# Supplementary material
Source: MDPI journal article supplement (https://www.mdpi.com/2075-163X/13/9/1121)
Supplement: s1 [file s1]

Archive with 3 entries (3 files):
- Supplementary File 1. Detrital zircon U-Pb dating and trace elements results.xlsx
- Supplementary File 2. Data for Figure 7d and 7e.xlsx
- Supplementary File 3. Analytical methods.pdf
