# Supplementary material
Source: MDPI journal article supplement (https://www.mdpi.com/2075-163X/13/9/1121)
Supplement: s1 [file s1 › Supplementary File 1. Detrital zircon U-Pb dating and trace elements results.xlsx]

## Sheet: Data
Spots	Final207_235	Final207_235_Int2SE	Final206_238	Final206_238_Int2SE	Final207_206	Final207_206_Int2SE		FinalAge207_235	FinalAge207_235_Int2SE	FinalAge206_238	FinalAge206_238_Int2SE	FinalAge207_206	FinalAge207_206_Int2SE	La_ppm_m139	Ce_ppm_m140	Pr_ppm_m141	Nd_ppm_m146	Sm_ppm_m147	Eu_ppm_m153	Gd_ppm_m157	Tb_ppm_m159	Dy_ppm_m163	Ho_ppm_m165	Er_ppm_m166	Tm_ppm_m169	Yb_ppm_m172	Lu_ppm_m175	Th_ppm_m232	U_ppm_m238			Comments	La	Ce	Pr	Nd	Sm	Eu	Gd	Tb	Dy	Ho	Er	Tm	Yb	Lu		Eu*	FinalAge206_238
This study
TT10#01	0.197	0.011	0.02825	0.00066	0.0506	0.0031		182	9.7	179.6	4.1	180	130	23.4	79	7.5	39.8	17	2.14	66	18.2	196	92	414	89	740	146	860	1140		0.237	TT10#01	98.7342	129.085	78.9474	85.2248	111.111	36.8966	321.168	486.631	771.654	1625.44	2501.51	3490.2	4352.94	5748.03		0.195317	179.6
TT10#02	0.263	0.011	0.0369	0.00072	0.0515	0.0019		236.4	8.8	233.6	4.5	250	86	0.59	40.6	0.39	3.8	5.8	1.79	34	10.8	106	42.5	154	31.1	346	75.5	910	1660		0.612	TT10#02	2.48945	66.3399	4.10526	8.13704	37.9085	30.8621	165.45	288.77	417.323	750.883	930.514	1219.61	2035.29	2972.44		0.389694	233.6
TT10#03	0.213	0.018	0.02879	0.00089	0.0529	0.0046		194	15	182.9	5.6	260	180		19.9	0.95	9.2	12.4	2.83	71	19.8	263	95	420	88	780	147	447	651		0.095	TT10#03	0	32.5163	10	19.7002	81.0458	48.7931	345.499	529.412	1035.43	1678.45	2537.76	3450.98	4588.24	5787.4		0.291588	182.9
TT10#04	0.196	0.017	0.02753	0.00097	0.0525	0.0049		183	15	175	6.1	230	180		19.7	0.2	5.7	7.9	3.3	31	11.1	125	36.4	167	29.5	293	59.7	477	660		0.467	TT10#04	0	32.1895	2.10526	12.2056	51.634	56.8966	150.852	296.791	492.126	643.11	1009.06	1156.86	1723.53	2350.39		0.644678	175
TT10#05	0.223	0.013	0.03212	0.00077	0.0503	0.0029		203	10	203.8	4.8	210	130	1.57	25.8	0.86	7.8	12.2	1.79	57	16.3	196	73.8	333	76	890	156	510	1270		0.153	TT10#05	6.62447	42.1569	9.05263	16.7024	79.7386	30.8621	277.372	435.829	771.654	1303.89	2012.08	2980.39	5235.29	6141.73		0.20752	203.8
TT10#06	0.204	0.013	0.03012	0.00078	0.0491	0.0032		188	11	191.3	4.8	140	140	0.44	26.4	0.36	4.4	11.4	2.89	49	11.6	117	48.6	205	44.5	455	92	543	1100		0.058	TT10#06	1.85654	43.1373	3.78947	9.42184	74.5098	49.8276	238.443	310.16	460.63	858.657	1238.67	1745.1	2676.47	3622.05		0.373827	191.3
TT10#07	0.203	0.019	0.02802	0.00086	0.0521	0.005		186	16	178.1	5.4	210	190	2	78	0.49	4.2	10.9	7.6	81	22.1	235	101	389	84	820	176	517	361		0.2055	TT10#07	8.43882	127.451	5.15789	8.99358	71.2418	131.034	394.161	590.909	925.197	1784.45	2350.45	3294.12	4823.53	6929.13		0.781954	178.1
TT10#08	0.287	0.017	0.0398	0.00095	0.0516	0.0029		254	13	251.6	5.9	240	120				0.19	1.3		14.5	8.7	125	59.7	318	79	890	199	44.6	1000		0.0374	TT10#08	0	0	0	0.406852	8.49673	0	70.5596	232.62	492.126	1054.77	1921.45	3098.04	5235.29	7834.65		0	251.6
TT10#09	0.287	0.018	0.039	0.0014	0.0531	0.0032		256	14	246.5	9	320	140	7.1	31	4.5	30	12.2	3.4	37.5	13.2	162	54.8	250	58	600	127	374	1480		0.254	TT10#09	29.9578	50.6536	47.3684	64.2398	79.7386	58.6207	182.482	352.941	637.795	968.198	1510.57	2274.51	3529.41	5000		0.485967	246.5
TT10#10	5.7	1.3	0.178	0.03	0.177	0.02		1550	220	1020	160	2280	280		8.9	0.067	1.03	0.54	0.61	13.5	4.6	51	28.9	122	24.2	281	66.9	124	720		0.0566	TT10#10	0	14.5425	0.705263	2.20557	3.52941	10.5172	65.6934	122.995	200.787	510.601	737.16	949.02	1652.94	2633.86		0.6907	1020
TT10#11	0.197	0.016	0.02853	0.00077	0.0494	0.0041		181	14	181.3	4.8	130	170		24.2	0.072	2.5	3.7	1.14	18.2	7.2	79	30.4	120	29.9	242	58.2	275	568		0.1655	TT10#11	0	39.5425	0.757895	5.35332	24.183	19.6552	88.5645	192.513	311.024	537.102	725.076	1172.55	1423.53	2291.34		0.424709	181.3
TT10#12	0.191	0.017	0.02596	0.00085	0.0529	0.0047		177	15	165.2	5.3	260	190		141	0.22	5.8	10.8	2.15	57	24	269	116	505	104	940	170	649	874		0.0255	TT10#12	0	230.392	2.31579	12.4197	70.5882	37.069	277.372	641.711	1059.06	2049.47	3051.36	4078.43	5529.41	6692.91		0.264919	165.2
TT10#13	0.188	0.012	0.0265	0.00081	0.0525	0.004		174	10	168.6	5.1	250	160	0.39	9.7	0.72	6.2	13.4	2.51	80	27.4	317	125	485	111	1000	177	562	1010		0.17	TT10#13	1.64557	15.8497	7.57895	13.2762	87.5817	43.2759	389.294	732.62	1248.03	2208.48	2930.51	4352.94	5882.35	6968.5		0.234369	168.6
TT10#14	0.183	0.017	0.02612	0.00092	0.0517	0.0053		169	14	166.2	5.8	150	200		18.8		0.4	1.43	0.31	11.7	6.4	108	34.7	173	43	393	89	161	374		0.0254	TT10#14	0	30.719	0	0.856531	9.34641	5.34483	56.9343	171.123	425.197	613.074	1045.32	1686.27	2311.76	3503.94		0.231699	166.2
TT10#15	0.211	0.029	0.0268	0.0013	0.058	0.0084		191	24	170.6	8.1	310	290		9	0.11	2.4	3.6	0.39	31.2	8.4	106	39.7	171	32.3	379	76	126	248			TT10#15	0	14.7059	1.15789	5.13919	23.5294	6.72414	151.825	224.599	417.323	701.413	1033.23	1266.67	2229.41	2992.13		0.112502	170.6
TT10#16	0.299	0.022	0.0404	0.0011	0.0538	0.0043		264	17	255	7.1	340	150		22.4	0.052	5.4	6	0.42	35	12.7	147	53	236	56	505	102	408	660			TT10#16	0	36.6013	0.547368	11.5632	39.2157	7.24138	170.316	339.572	578.74	936.396	1425.98	2196.08	2970.59	4015.75		0.088606	255
TT10#17	0.208	0.021	0.0281	0.0018	0.053	0.0056		191	18	178	11	310	230		27.6		2.9	4.9	2.6	28.7	9	76	34.1	156	25.4	298	58.7	126	347			TT10#17	0	45.098	0	6.20985	32.0261	44.8276	139.659	240.642	299.213	602.473	942.598	996.078	1752.94	2311.02		0.670283	178
TT10#18	0.22	0.024	0.0325	0.0011	0.0495	0.0055		199	20	206.3	6.7	90	210		3.6	0.12	3.2	9.3		49	21.2	266	104	339	65	580	105	189	313			TT10#18	0	5.88235	1.26316	6.85225	60.7843	0	238.443	566.845	1047.24	1837.46	2048.34	2549.02	3411.76	4133.86		0	206.3
TT10#19	0.186	0.02	0.02668	0.00099	0.0509	0.0055		171	17	169.7	6.2	110	210		11.9	0.22	5.9	6.5	0.56	30.7	12.3	134	56.8	237	48.6	422	81	152	380			TT10#19	0	19.4444	2.31579	12.6338	42.4837	9.65517	149.392	328.877	527.559	1003.53	1432.02	1905.88	2482.35	3188.98		0.121195	169.7
TT10#20	0.207	0.015	0.02911	0.00087	0.0515	0.0036		189	12	184.9	5.4	200	140	23.5	60	6.2	40	9.7	0.62	24.8	9.8	112	46	256	71	516	123	271	800			TT10#20	99.1561	98.0392	65.2632	85.6531	63.3987	10.6897	120.681	262.032	440.945	812.721	1546.83	2784.31	3035.29	4842.52		0.122209	184.9
TT10#21	0.647	0.04	0.0823	0.002	0.0563	0.0033		501	25	509	12	420	130		1.6	0.14	3.1	4.9		61	19.9	204	78	349	71	680	114	115	324			TT10#21	0	2.61438	1.47368	6.63812	32.0261	0	296.837	532.086	803.15	1378.09	2108.76	2784.31	4000	4488.19		0	509
TT10#22	0.211	0.0096	0.02989	0.00064	0.0509	0.0025		193.9	8.1	189.8	4	210	100	0.039	16.3	0.79	6.1	6.8	0.64	54	17.8	222	100	420	82	840	131	409	1610			TT10#22	0.164557	26.634	8.31579	13.0621	44.4444	11.0345	262.774	475.936	874.016	1766.78	2537.76	3215.69	4941.18	5157.48		0.102106	189.8
TT10#23	0.221	0.016	0.031	0.001	0.0527	0.0039		204	14	196.6	6.4	230	150		48.9	0.086	1.15	3.3	0.36	15.8	7.6	109	59.5	262	63.6	653	121	198	556			TT10#23	0	79.902	0.905263	2.46253	21.5686	6.2069	76.8856	203.209	429.134	1051.24	1583.08	2494.12	3841.18	4763.78		0.15242	196.6
TT10#24	0.194	0.049	0.027	0.001	0.051	0.012		175	41	171.5	6.3	80	450	1.54	97	0.76	13.4	14.8	9.2	93	34	404	141	629	128	1100	222	460	306			TT10#24	6.49789	158.497	8	28.6938	96.732	158.621	452.555	909.091	1590.55	2491.17	3800.6	5019.61	6470.59	8740.16		0.758122	171.5
TT10#25	0.249	0.037	0.0273	0.0013	0.0643	0.0097		219	30	173.8	8	480	310		26.7	0.011	0.91	2.3	0.88	10.9	6.3	53	31	135	33	351	79	148	150			TT10#25	0	43.6275	0.115789	1.94861	15.0327	15.1724	53.0414	168.449	208.661	547.703	815.71	1294.12	2064.71	3110.24		0.537315	173.8
TT10#26	0.191	0.023	0.0297	0.001	0.0468	0.0056		175	20	188.6	6.4	-20	230		27		1.15	3.7	0.81	41	12.6	180	68	303	73	690	158	283	493			TT10#26	0	44.1176	0	2.46253	24.183	13.9655	199.513	336.898	708.661	1201.41	1830.82	2862.75	4058.82	6220.47		0.201055	188.6
TT10#27	0.194	0.021	0.02696	0.00089	0.0512	0.0055		178	17	171.5	5.6	190	220	1.04	27	3.4	33	39	6	89	27	280	79	313	74	670	149	500	1040			TT10#27	4.38819	44.1176	35.7895	70.6638	254.902	103.448	433.09	721.925	1102.36	1395.76	1891.24	2901.96	3941.18	5866.14		0.311349	171.5
TT10#28	0.263	0.028	0.028	0.0014	0.0674	0.0065		234	22	177.7	8.8	720	220		7.2	0.6	4.6	17	1.28	43	17.3	184	66	300	73	520	137	286	470			TT10#28	0	11.7647	6.31579	9.85011	111.111	22.069	209.246	462.567	724.409	1166.08	1812.69	2862.75	3058.82	5393.7		0.144735	177.7
TT10#29	0.193	0.018	0.0265	0.001	0.0523	0.0044		181	16	168.6	6.4	260	180	1.36	24.7	2.26	24	24.8	5.8	41	16.1	196	78	326	72	780	144	590	1360			TT10#29	5.7384	40.3595	23.7895	51.3919	162.092	100	199.513	430.481	771.654	1378.09	1969.79	2823.53	4588.24	5669.29		0.556076	168.6
TT10#30	0.607	0.052	0.0736	0.0033	0.059	0.0051		476	33	457	20	470	190	12.8	36	4.1	19.8	7.9	0.51	15	7.8	83	38.5	156	32.8	353	89	272	950			TT10#30	54.0084	58.8235	43.1579	42.3983	51.634	8.7931	72.9927	208.556	326.772	680.212	942.598	1286.27	2076.47	3503.94		0.14323	457
TT10#31	0.665	0.033	0.0853	0.002	0.0565	0.0027		515	20	527	12	430	110		2.2	0.05		2.8		26	12.9	146	56	198	41	338	76	229	750			TT10#31	0	3.59477	0.526316	0	18.3007	0	126.521	344.92	574.803	989.399	1196.37	1607.84	1988.24	2992.13		0	527
TT10#32	0.209	0.017	0.0294	0.0011	0.0515	0.0045		191	14	186.5	7	200	180	0.61	47	0.084	3.9	7.2	1.03	23	15	150	72	298	79	660	136	455	710			TT10#32	2.57384	76.7974	0.884211	8.35118	47.0588	17.7586	111.922	401.07	590.551	1272.08	1800.6	3098.04	3882.35	5354.33		0.244698	186.5
TT10#33	0.213	0.035	0.0286	0.0012	0.0562	0.0097		194	30	181.6	7.5	140	320		15	0.24	1.7	7.5	1.35	18.8	13.6	149	69	300	46.3	490	103	232	318			TT10#33	0	24.5098	2.52632	3.64026	49.0196	23.2759	91.4842	363.636	586.614	1219.08	1812.69	1815.69	2882.35	4055.12		0.347574	181.6
TT10#34	0.208	0.018	0.02825	0.00075	0.0529	0.0044		190	15	179.5	4.7	250	170	0.11	38.6	0.39	8.3	12.6	2.35	84	22.5	318	121	511	100	1010	205	1500	1240			TT10#34	0.464135	63.0719	4.10526	17.773	82.3529	40.5172	408.759	601.604	1251.97	2137.81	3087.61	3921.57	5941.18	8070.87		0.220834	179.5
TT10#35	0.266	0.035	0.0342	0.0013	0.0582	0.0078		234	28	216.5	8.1	330	270	0.48	73	1	9.8	9.4	3.9	38	21.4	263	77	320	82	750	162	367	490			TT10#35	2.02532	119.281	10.5263	20.985	61.4379	67.2414	184.915	572.193	1035.43	1360.42	1933.53	3215.69	4411.76	6377.95		0.630859	216.5
TT10#36	0.203	0.02	0.0285	0.0011	0.0538	0.0057		185	17	180.9	6.9	230	210		87	0.21	1.9	5.1	1.6	44	13.1	192	84	379	80	790	167	575	758			TT10#36	0	142.157	2.21053	4.06852	33.3333	27.5862	214.112	350.267	755.906	1484.1	2290.03	3137.25	4647.06	6574.8		0.326537	180.9
TT10#37	0.188	0.049	0.0303	0.002	0.048	0.013		169	42	192	12	-220	420	0.039	69	0.07	1.3	8.2	1.45	27	9.9	114	71	300	75	610	136	290	232			TT10#37	0.164557	112.745	0.736842	2.78373	53.5948	25	131.387	264.706	448.819	1254.42	1812.69	2941.18	3588.24	5354.33		0.297922	192
TT10#38	0.228	0.03	0.03	0.0017	0.0583	0.008		204	24	191	11	330	270	8.2	48	2.8	23	15	2.4	79	14.6	227	70	330	59	730	111	297	590			TT10#38	34.5992	78.4314	29.4737	49.2505	98.0392	41.3793	384.428	390.374	893.701	1236.75	1993.96	2313.73	4294.12	4370.08		0.213145	191
TT10#39	0.175	0.017	0.02746	0.00067	0.0462	0.0045		162	14	174.6	4.2	-40	180		20.8	0.01	2.4	3.5	1.31	32	7.9	120	37.1	156	35.5	338	82	314	501			TT10#39	0	33.9869	0.105263	5.13919	22.8758	22.5862	155.718	211.23	472.441	655.477	942.598	1392.16	1988.24	3228.35		0.37843	174.6
TT10#40	0.218	0.024	0.0296	0.001	0.0553	0.0065		201	21	188	6.4	250	230	0.024	57	0.41	6.3	9.4	3.12	65	17.4	239	83	364	67.6	740	128	264	399			TT10#40	0.101266	93.1373	4.31579	13.4904	61.4379	53.7931	316.302	465.241	940.945	1466.43	2199.4	2650.98	4352.94	5039.37		0.385885	188
TT10#41	0.214	0.017	0.02953	0.00089	0.0527	0.0043		195	14	187.6	5.6	240	170	1.7	121	0.53	3.6	4.6	1.33	70	24.5	305	111	500	109	1170	263	1150	1570			TT10#41	7.173	197.712	5.57895	7.70878	30.0654	22.931	340.633	655.08	1200.79	1961.13	3021.15	4274.51	6882.35	10354.3		0.226593	187.6
TT10#42	0.208	0.015	0.02983	0.00079	0.0507	0.0038		193	13	189.4	4.9	190	150	0.25	268	2.5	29.5	49	12.7	205	84	810	312	1090	235	2220	413	2470	1450			TT10#42	1.05485	437.908	26.3158	63.1692	320.261	218.966	997.567	2245.99	3188.98	5512.37	6586.1	9215.69	13058.8	16259.8		0.387394	189.4
TT10#43	0.18	0.038	0.0283	0.0019	0.046	0.01		161	31	180	12	-130	370		23		0.5	1.5	1.27	39	8.9	129	60	300	66	650	123	311	410			TT10#43	0	37.5817	0	1.07066	9.80392	21.8966	189.781	237.968	507.874	1060.07	1812.69	2588.24	3823.53	4842.52		0.507633	180
TT10#44	0.62	0.056	0.0736	0.0034	0.0605	0.0055		488	33	458	21	570	180		17		2.8	5.7	0.67	36	14.1	185	82	370	82	820	150	269	590			TT10#44	0	27.7778	0	5.99572	37.2549	11.5517	175.182	377.005	728.346	1448.76	2235.65	3215.69	4823.53	5905.51		0.142991	458
TT10#45	0.204	0.017	0.0317	0.0014	0.0472	0.0041		187	15	201.2	9	20	170		34	0.038	2.8	3.9	0.29	56	23.8	256	122	520	110	1410	209	1400	2020			TT10#45	0	55.5556	0.4	5.99572	25.4902	5	272.506	636.364	1007.87	2155.48	3141.99	4313.73	8294.12	8228.35		0.0599923	201.2
TT10#46	10.6	4.6	0.116	0.04	0.43	0.11		1750	490	680	220	3390	600	19.4	57	0.74	6.9	11.5	3	52	15.4	180	76	224	72	740	126	1380	1710			TT10#46	81.8565	93.1373	7.78947	14.7752	75.1634	51.7241	253.041	411.765	708.661	1342.76	1353.47	2823.53	4352.94	4960.63		0.375054	680
TT10#47	0.196	0.013	0.0291	0.001	0.049	0.0031		181	11	184.7	6.3	110	130	0.025	19.6	0.53	4.6	9.5	1.31	37	13.5	320	160	510	150	980	145	660	1700			TT10#47	0.105485	32.0261	5.57895	9.85011	62.0915	22.5862	180.049	360.963	1259.84	2826.86	3081.57	5882.35	5764.71	5708.66		0.213615	184.7
TT10#48	0.206	0.02	0.0293	0.001	0.0519	0.0054		188	17	186	6.4	170	200		19	1.27	9	9.6	4.3	80	29.1	520	129	510	96	970	129	510	1480			TT10#48	0	31.0458	13.3684	19.2719	62.7451	74.1379	389.294	778.075	2047.24	2279.15	3081.57	3764.71	5705.88	5078.74		0.474364	186
TT10#49	0.204	0.018	0.02811	0.00085	0.0528	0.0047		186	15	178.6	5.3	220	180		24		0.92	6	0.59	19.2	6	98	49	200	46	530	137	380	1030			TT10#49	0	39.2157	0	1.97002	39.2157	10.1724	93.4307	160.428	385.827	865.724	1208.46	1803.92	3117.65	5393.7		0.168054	178.6
TT10#50	0.211	0.043	0.029	0.0015	0.0489	0.0092		185	35	184.5	9.3	0	360		109	0.24	5.4	7	0.68	55	15.5	205	160	360	91	830	210	330	360			TT10#50	0	178.105	2.52632	11.5632	45.7516	11.7241	267.64	414.439	807.087	2826.86	2175.23	3568.63	4882.35	8267.72		0.10595	184.5
TT10#51	0.298	0.022	0.0405	0.0013	0.0534	0.0034		264	17	255.9	7.8	300	140		15.8	0.015	0.09	0.48		9.7	3	45	36	200	46	490	89	300	1090			TT10#51	0	25.817	0.157895	0.192719	3.13725	0	47.2019	80.2139	177.165	636.042	1208.46	1803.92	2882.35	3503.94		0	255.9
TT10#52	0.239	0.037	0.0301	0.0016	0.0586	0.0097		213	30	190.9	9.9	310	320	23	91	7.4	46	6.7	3	57	19.1	265	125	430	106	940	146	350	1290			TT10#52	97.0464	148.693	77.8947	98.5011	43.7908	51.7241	277.372	510.695	1043.31	2208.48	2598.19	4156.86	5529.41	5748.03		0.469321	190.9
TT10#53	0.191	0.02	0.0281	0.0011	0.0485	0.005		175	17	178.4	6.8	80	210	4.8	36	1.7	19	5.1	0.44	18	5.4	71	25	118	35	370	93	310	760			TT10#53	20.2532	58.8235	17.8947	40.6852	33.3333	7.58621	87.5912	144.385	279.528	441.696	712.991	1372.55	2176.47	3661.42		0.140396	178.4
TT10#54	0.188	0.025	0.0277	0.0013	0.0475	0.0061		171	21	175.8	8.2	40	250		55	0.36	6.1	12.3	4.5	55	16.3	215	83	424	91	830	171	382	318			TT10#54	0	89.8693	3.78947	13.0621	80.3922	77.5862	267.64	435.829	846.457	1466.43	2561.93	3568.63	4882.35	6732.28		0.528935	175.8
TT10#55	0.199	0.026	0.0272	0.0014	0.0523	0.0071		181	22	172.8	8.8	180	270	3.9	15.5	1.46	6.5	2.8	0.74	20.7	10.3	104	37.1	149	33	383	65	152	372			TT10#55	16.4557	25.3268	15.3684	13.9186	18.3007	12.7586	100.73	275.401	409.449	655.477	900.302	1294.12	2252.94	2559.06		0.297161	172.8
TT10#56	0.219	0.028	0.0284	0.0013	0.0565	0.008		198	23	180.2	8.1	340	280	30	84	8.6	59	16.2	1.56	34	11	161	59	316	51	510	101	191	348			TT10#56	126.582	137.255	90.5263	126.338	105.882	26.8966	165.45	294.118	633.858	1042.4	1909.37	2000	3000	3976.38		0.203213	180.2
TT10#57	3.35	0.32	0.1638	0.0076	0.143	0.0076		1448	71	975	42	2211	93	0.1	5.1	0.45	4.3	6.2	2	19	7.2	92	30	130	34.5	340	90	184	930			TT10#57	0.421941	8.33333	4.73684	9.20771	40.5229	34.4828	92.4574	192.513	362.205	530.035	785.498	1352.94	2000	3543.31		0.563353	975
TT10#58	0.208	0.019	0.0285	0.0011	0.0551	0.0059		190	16	180.9	6.8	290	200	2.6	43	1.54	10.7	8.5	0.81	44	13.8	162	67	268	64.6	594	125	590	700			TT10#58	10.9705	70.2614	16.2105	22.9122	55.5556	13.9655	214.112	368.984	637.795	1183.75	1619.34	2533.33	3494.12	4921.26		0.128048	180.9
TT10#59	0.183	0.012	0.02788	0.00064	0.0478	0.0033		170	10	177.3	4	80	140	0.1	21	0.25	3.7	8.6	1.23	33	14.7	109	69	250	53	530	98	420	980			TT10#59	0.421941	34.3137	2.63158	7.92291	56.2092	21.2069	160.584	393.048	429.134	1219.08	1510.57	2078.43	3117.65	3858.27		0.223215	177.3
TT10#60	0.183	0.022	0.0288	0.001	0.0463	0.0057		167	18	183.3	6.4	-30	230		54.3	0.08	2.7	6.8	1.37	42	14.7	193	61	250	48.2	553	118	319	451			TT10#60	0	88.7255	0.842105	5.78158	44.4444	23.6207	204.38	393.048	759.843	1077.74	1510.57	1890.2	3252.94	4645.67		0.247836	183.3
TT10#61	0.337	0.072	0.039	0.0034	0.063	0.013		278	51	246	21	390	390		0.95		0.14		0.059	5.7	1.13	23.6	8.4	49	13.1	130	26.6	19.3	64.5			TT10#61	0	1.55229	0	0.299786	0	1.01724	27.7372	30.2139	92.9134	148.41	296.073	513.725	764.706	1047.24		#DIV/0!	246
TT10#62	0.19	0.024	0.0293	0.0011	0.0473	0.0059		173	20	186.1	6.8	-50	220		21.3		1.42	1.06	2.06	21.6	6.1	65	21.7	82	25.8	227	50	80	285			TT10#62	0	34.8039	0	3.04069	6.9281	35.5172	105.109	163.102	255.906	383.392	495.468	1011.76	1335.29	1968.5		1.31617	186.1
TT10#63	0.167	0.023	0.0271	0.0011	0.0442	0.006		153	20	172.6	6.9	-130	240		3.6	0.129	2.2	7.4	1.26	30	8.2	107	45.7	156	40.4	397	80.4	70	165			TT10#63	0	5.88235	1.35789	4.71092	48.366	21.7241	145.985	219.251	421.26	807.42	942.598	1584.31	2335.29	3165.35		0.258534	172.6
TT10#64	0.211	0.023	0.02833	0.00098	0.0539	0.0065		192	19	180.1	6.1	250	240	0.89	24	2.19	21.2	30.6	5.8	102	32.4	384	124	429	102	890	154	561	870			TT10#64	3.75527	39.2157	23.0526	45.3961	200	100	496.35	866.31	1511.81	2190.81	2592.15	4000	5235.29	6062.99		0.317388	180.1
TT10#65	0.3	0.016	0.04265	0.00089	0.051	0.0026		265	12	269.2	5.5	210	110	6	61	2.49	18	11.9	1.7	71	21.3	328	132	550	94	1040	196	630	1360			TT10#65	25.3165	99.6732	26.2105	38.5439	77.7778	29.3103	345.499	569.519	1291.34	2332.16	3323.26	3686.27	6117.65	7716.54		0.178801	269.2
TT10#66	0.223	0.033	0.0291	0.0014	0.0567	0.0078		198	26	184.9	8.5	240	260		29.4	0.074	2.2	4.5	2.07	22.2	7.7	104	38.1	150	36.4	440	92	280	291			TT10#66	0	48.0392	0.778947	4.71092	29.4118	35.6897	108.029	205.882	409.449	673.145	906.344	1427.45	2588.24	3622.05		0.633157	184.9
TT10#67	0.2	0.011	0.02825	0.00069	0.051	0.0028		184.5	9.4	179.6	4.3	220	120	0.32	21.7	1.51	11.6	13.9	2.18	49	19.3	211	105	440	85	820	164	610	1440			TT10#67	1.35021	35.4575	15.8947	24.8394	90.8497	37.5862	238.443	516.043	830.709	1855.12	2658.61	3333.33	4823.53	6456.69		0.255373	179.6
TT10#68	0.192	0.02	0.02883	0.00096	0.0487	0.0051		176	17	183.2	6	40	200		57	0.12	4	7.1	2.65	46	15.2	187	77	287	69	620	126	286	359			TT10#68	0	93.1373	1.26316	8.56531	46.4052	45.6897	223.844	406.417	736.22	1360.42	1734.14	2705.88	3647.06	4960.63		0.448292	183.2
TT10#69	0.21	0.017	0.0295	0.0011	0.0523	0.0043		192	14	187.2	7.1	230	170	0.14	26.6	0.42	11.7	19.1	5.2	92	28.8	322	124	479	113	960	203	526	498			TT10#69	0.590717	43.4641	4.42105	25.0535	124.837	89.6552	447.689	770.053	1267.72	2190.81	2894.26	4431.37	5647.06	7992.13		0.379242	187.2
TT10#70	0.186	0.021	0.02812	0.00085	0.0481	0.0055		174	19	178.7	5.3	40	210		7.4		0.62	1.4	0.45	11.7	3.4	70	25.2	125	29.2	310	59.4	124	379			TT10#70	0	12.0915	0	1.32762	9.15033	7.75862	56.9343	90.9091	275.591	445.23	755.287	1145.1	1823.53	2338.58		0.339922	178.7
TT10#71	0.257	0.013	0.03584	0.00075	0.0512	0.0021		232	10	227	4.7	248	96	0.022	16.5	0.29	3.2	9.6	0.93	70	21.8	303	109	461	98	880	169	930	2310			TT10#71	0.092827	26.9608	3.05263	6.85225	62.7451	16.0345	340.633	582.888	1192.91	1925.8	2785.5	3843.14	5176.47	6653.54		0.109679	227
TT10#72	0.189	0.016	0.02692	0.0009	0.0516	0.0048		174	14	171.2	5.7	160	170		11.2	0.09	2.3	6.2	0.17	37.1	14	171	62.1	255	44.5	410	82	211	464			TT10#72	0	18.3007	0.947368	4.92505	40.5229	2.93103	180.535	374.332	673.228	1097.17	1540.79	1745.1	2411.76	3228.35		0.0342681	171.2
TT10#73	0.2	0.015	0.02875	0.00072	0.0504	0.0038		184	13	182.7	4.5	170	160	0.11	18.2	0.062	0.35	2.7	0.88	18.7	11.3	128	47.1	211	54	550	111	356	1080			TT10#73	0.464135	29.7386	0.652632	0.749465	17.6471	15.1724	90.9976	302.139	503.937	832.155	1274.92	2117.65	3235.29	4370.08		0.37862	182.7
TT10#74	0.192	0.01	0.02711	0.00074	0.0514	0.0029		177.5	8.8	172.4	4.7	230	120		283	0.33	14.5	38	11.7	206	56	560	212	790	166	1530	284	2780	1300			TT10#74	0	462.418	3.47368	31.0493	248.366	201.724	1002.43	1497.33	2204.72	3745.58	4773.41	6509.8	9000	11181.1		0.404282	172.4
TT10#75	0.283	0.024	0.0423	0.0016	0.0488	0.0042		250	19	267.1	9.8	80	170		8.6		0.26		0.09	19	5.7	89	33.3	133	40.4	405	75	203	610			TT10#75	0	14.0523	0	0.556745	0	1.55172	92.4574	152.406	350.394	588.339	803.625	1584.31	2382.35	2952.76		#DIV/0!	267.1
TT10#76	0.206	0.015	0.02833	0.00071	0.0533	0.0043		189	12	180.1	4.5	270	170		86	0.078	4.3	8.5	2.01	25.7	10.8	121	53.3	210	41.5	470	100	787	600			TT10#76	0	140.523	0.821053	9.20771	55.5556	34.6552	125.061	288.77	476.378	941.696	1268.88	1627.45	2764.71	3937.01		0.415761	180.1
TT10#77	0.19	0.034	0.0287	0.0015	0.0508	0.0095		170	28	182	9.6	-70	310		95	0.053	5.1	8.9	1.65	46	18.1	172	85	302	72	590	123	209	207			TT10#77	0	155.229	0.557895	10.9208	58.1699	28.4483	223.844	483.957	677.165	1501.77	1824.77	2823.53	3470.59	4842.52		0.249307	182
TT10#78	0.208	0.017	0.02977	0.00082	0.0502	0.0039		190	14	189.1	5.1	140	150		26.6	0.017	2.9	4.1	1.56	26	7	88	36.8	182	38	410	112	460	1060			TT10#78	0	43.4641	0.178947	6.20985	26.7974	26.8966	126.521	187.166	346.457	650.177	1099.7	1490.2	2411.76	4409.45		0.461923	189.1
TT10#79	0.181	0.026	0.0291	0.0014	0.0469	0.0069		164	22	184.7	8.5	-90	260		11.4	0.01	0.4	2.2	1.27	13.5	8.2	88	37	162	40	395	88	81	161			TT10#79	0	18.6275	0.105263	0.856531	14.3791	21.8966	65.6934	219.251	346.457	653.71	978.852	1568.63	2323.53	3464.57		0.712441	184.7
TT10#80	0.2	0.015	0.0293	0.00076	0.0497	0.0035		184	13	186.1	4.7	130	140	0.05	27.3	0.057	0.92	3.5	1.05	22.2	6.6	107	33.6	131	29.1	338	64	305	680			TT10#80	0.21097	44.6078	0.6	1.97002	22.8758	18.1034	108.029	176.471	421.26	593.64	791.541	1141.18	1988.24	2519.69		0.364169	186.1
TT10#81	0.198	0.013	0.02898	0.00066	0.0495	0.0031		182	11	184.2	4.1	130	130		46		0.79	4.1	0.57	32	11.3	150	62	282	64	780	165	790	1330			TT10#81	0	75.1634	0	1.69165	26.7974	9.82759	155.718	302.139	590.551	1095.41	1703.93	2509.8	4588.24	6496.06		0.152136	184.2
TT10#82	0.2	0.016	0.02769	0.00077	0.0524	0.004		186	14	176	4.8	250	160		29	0.44	9.6	9.3	1.24	32	12.3	143	62	264	54.9	620	132	670	930			TT10#82	0	47.3856	4.63158	20.5567	60.7843	21.3793	155.718	328.877	562.992	1095.41	1595.17	2152.94	3647.06	5196.85		0.21975	176
TT10#83	0.299	0.016	0.0422	0.0011	0.0514	0.0031		264	13	266.6	6.6	220	130		32.6	0.12	6.3	10.5	2.2	57	22.4	222	98	389	92	890	202	499	840			TT10#83	0	53.268	1.26316	13.4904	68.6275	37.931	277.372	598.93	874.016	1731.45	2350.45	3607.84	5235.29	7952.76		0.274925	266.6
TT10#84	0.194	0.018	0.0294	0.001	0.0478	0.0044		181	16	186.7	6.5	50	180		5.3		0.56	2.3	0.66	16.6	5.6	83	33.5	135	30	335	74	167	670			TT10#84	0	8.66013	0	1.19914	15.0327	11.3793	80.7786	149.733	326.772	591.873	815.71	1176.47	1970.59	2913.39		0.32655	186.7
TT10#85	0.215	0.014	0.02948	0.00085	0.0528	0.0037		197	11	187.3	5.3	270	150	0.024	12.7	0.044	7.1	8	0.27	58	19.4	239	97	440	78	680	155	364	1110			TT10#85	0.101266	20.7516	0.463158	15.2034	52.2876	4.65517	282.238	518.717	940.945	1713.78	2658.61	3058.82	4000	6102.36		0.0383203	187.3
TT10#86	0.573	0.03	0.0701	0.0035	0.0591	0.0017		457	19	436	21	558	65	1.45	18	4.3	23.8	14.8	6.3	40	12.2	105	40.8	213	72	770	169	216	2170			TT10#86	6.11814	29.4118	45.2632	50.9636	96.732	108.621	194.647	326.203	413.386	720.848	1287.01	2823.53	4529.41	6653.54		0.791596	436
TT10#87	0.275	0.026	0.02917	0.00086	0.0703	0.0071		243	21	185.3	5.4	720	210	0.16	14.4	0.44	6.5	6.7	2.15	26.9	6.5	67	22.4	109	21.2	195	45.1	238	496			TT10#87	0.675105	23.5294	4.63158	13.9186	43.7908	37.069	130.9	173.797	263.78	395.76	658.61	831.373	1147.06	1775.59		0.489608	185.3
TT10#88	0.203	0.029	0.0291	0.0014	0.0496	0.0071		183	24	184.5	8.6	50	250		39.5	0.054	3.8	5.1	2.86	32	9.9	117	53	216	54	560	97	242	225			TT10#88	0	64.5425	0.568421	8.13704	33.3333	49.3103	155.718	264.706	460.63	936.396	1305.14	2117.65	3294.12	3818.9		0.684431	184.5
TT10#89	0.213	0.015	0.02986	0.00069	0.0512	0.0036		194	13	189.7	4.3	190	150		13.9	0.23	4.4	12.3	1.33	74	24.8	338	110	402	77	770	129	422	930			TT10#89	0	22.7124	2.42105	9.42184	80.3922	22.931	360.097	663.102	1330.71	1943.46	2429	3019.61	4529.41	5078.74		0.134774	189.7
TT10#90	0.202	0.013	0.02881	0.00068	0.0501	0.0029		186	11	183.1	4.3	180	130	0.98	29.3	0.73	4	5.2	0.86	22.9	9.3	125	59	220	52	500	109	470	1490			TT10#90	4.13502	47.8758	7.68421	8.56531	33.9869	14.8276	111.436	248.663	492.126	1042.4	1329.31	2039.22	2941.18	4291.34		0.240937	183.1
TT10#91	0.2053	0.0097	0.0301	0.00066	0.0489	0.0021		189.1	8.2	191.2	4.1	177	96	0.31	54	0.76	8.3	10.1	1.98	63	18.7	244	109	430	115	1250	243	1260	1620			TT10#91	1.30802	88.2353	8	17.773	66.0131	34.1379	306.569	500	960.63	1925.8	2598.19	4509.8	7352.94	9566.93		0.239971	191.2
TT10#92	0.189	0.015	0.02883	0.00094	0.0485	0.0044		174	13	183.2	5.9	50	170	222	380	48	145	24.9	5	30.5	10.1	106	41.6	199	42.5	373	76.3	293	544			TT10#92	936.709	620.915	505.263	310.493	162.745	86.2069	148.418	270.053	417.323	734.982	1202.42	1666.67	2194.12	3003.94		0.554682	183.2
TT10#93	0.238	0.023	0.0341	0.0017	0.0503	0.0044		213	18	216	10	120	170	0.08	6.6	0.81	5.2	5.9	0.68	31.6	10.6	115	41.9	146	39.1	332	68	128	890			TT10#93	0.337553	10.7843	8.52632	11.1349	38.5621	11.7241	153.771	283.422	452.756	740.283	882.175	1533.33	1952.94	2677.17		0.152252	216
TT10#94	0.208	0.026	0.0288	0.0012	0.0524	0.0065		188	22	182.7	7.5	130	240		68	0.19	3.8	7.5	3.08	51	17.1	230	78	379	86	703	155	367	320			TT10#94	0	111.111	2	8.13704	49.0196	53.1034	248.175	457.219	905.512	1378.09	2290.03	3372.55	4135.29	6102.36		0.481458	182.7
TT10#95	0.197	0.018	0.0291	0.001	0.0505	0.0053		180	15	184.8	6.4	140	200		29	0.25	4.9	9.9	1.61	41	16.9	176	78	328	75	680	135	293	514			TT10#95	0	47.3856	2.63158	10.4925	64.7059	27.7586	199.513	451.872	692.913	1378.09	1981.87	2941.18	4000	5314.96		0.244309	184.8
TT10#96	0.223	0.011	0.02302	0.00064	0.071	0.004		205.3	9.3	146.7	4	900	120	12.7	107	14.4	106	71	21	132	29.9	390	98	396	95	1000	161	730	1600			TT10#96	53.5865	174.837	151.579	226.981	464.052	362.069	642.336	799.465	1535.43	1731.45	2392.75	3725.49	5882.35	6338.58		0.663173	146.7
TT10#97	0.239	0.034	0.0321	0.0016	0.0536	0.0064		216	28	203.3	9.7	230	250	0.91	31.9	3.13	25.5	16.6	5.6	50	17.4	209	67	351	81	920	169	276	630			TT10#97	3.83966	52.1242	32.9474	54.6039	108.497	96.5517	243.309	465.241	822.835	1183.75	2120.85	3176.47	5411.76	6653.54		0.594255	203.3
TT10#98	0.222	0.012	0.03199	0.00079	0.0503	0.0025		203.1	9.6	202.9	4.9	180	110	0.018	22.3	0.035	3.1	8.8	0.022	53	20.3	247	88	401	82	830	141	415	1100			TT10#98	0.0759494	36.4379	0.368421	6.63812	57.5163	0.37931	257.908	542.781	972.441	1554.77	2422.96	3215.69	4882.35	5551.18		0.00311435	202.9
TT10#99	0.214	0.021	0.0315	0.001	0.0494	0.0048		194	18	200	6.3	80	190	0.22	23.1	0.029	0.83	2.1	1.45	16.9	5.9	81	32.3	128	31.9	300	69	234	605			TT10#99	0.92827	37.7451	0.305263	1.7773	13.7255	25	82.2384	157.754	318.898	570.671	773.414	1250.98	1764.71	2716.54		0.744113	200
TT10#100	0.484	0.032	0.0533	0.0032	0.0676	0.0035		397	21	334	20	790	110	0.69	13	2.62	18	12.6	5	38.2	12.4	141	47.3	210	49	439	94	180	662			TT10#100	2.91139	21.2418	27.5789	38.5439	82.3529	86.2069	185.888	331.551	555.118	835.689	1268.88	1921.57	2582.35	3700.79		0.69675	334
TT10#101	0.21	0.02	0.0286	0.0012	0.0541	0.005		192	16	181.5	7.7	290	200		10.4	0.007	0.65	2.2	0.26	8.7	5.3	39.9	16.4	99	19.6	213	41.9	121	582			TT10#101	0	16.9935	0.0736842	1.39186	14.3791	4.48276	42.3358	141.711	157.087	289.753	598.187	768.627	1252.94	1649.61		0.181688	181.5
TT10#102	0.197	0.023	0.0276	0.0011	0.0508	0.0058		179	19	175.5	6.9	150	230		18.5	0.5	10	16.2	4.44	87	25.2	242	105	392	79	700	132	254	288			TT10#102	0	30.2288	5.26316	21.4133	105.882	76.5517	423.358	673.797	952.756	1855.12	2368.58	3098.04	4117.65	5196.85		0.361568	175.5
TT10#103	0.206	0.022	0.02813	0.00089	0.0523	0.0047		191	19	178.8	5.6	240	190	0.065	20.5		0.94	2	0.68	6.2	4.2	44	20.4	89	22.9	265	49.8	195	480			TT10#103	0.274262	33.4967	0	2.01285	13.0719	11.7241	30.1703	112.299	173.228	360.424	537.764	898.039	1558.82	1960.63		0.590366	178.8
TT10#104	0.213	0.034	0.0277	0.0012	0.055	0.0078		189	28	176.1	7.7	200	280	1.16	46	0.38	3.1	6.8	5.3	45	13.2	217	63	281	57	600	123	269	234			TT10#104	4.89451	75.1634	4	6.63812	44.4444	91.3793	218.978	352.941	854.331	1113.07	1697.89	2235.29	3529.41	4842.52		0.926273	176.1
TT10#105	0.22	0.024	0.0292	0.0012	0.0544	0.0058		200	20	185.8	7.6	300	230	0.33	30	1.12	6.9	15.2	1.78	66	22.8	245	111	530	126	1080	190	680	1200			TT10#105	1.39241	49.0196	11.7895	14.7752	99.3464	30.6897	321.168	609.626	964.567	1961.13	3202.42	4941.18	6352.94	7480.31		0.171811	185.8
TT23#01	0.295	0.02	0.0273	0.0013	0.0822	0.0077		261	15	173.6	8	1050	190	4.61	40.2	5	28.9	14.6	5.2	31.1	10.1	82	30.6	111	23.5	209	37.6	153	303			TT23#01	19.4515	65.6863	52.6316	61.8844	95.4248	89.6552	151.338	270.053	322.835	540.636	670.695	921.569	1229.41	1480.31		0.746054	173.6
TT23#02	3.91	0.36	0.226	0.016	0.1211	0.0035		1563	77	1303	82	1955	51		0.72	0.021	1.24	4.6	0.15	25.1	10.9	149	54.5	262	54.1	529	99	106	732			TT23#02	0	1.17647	0.221053	2.65525	30.0654	2.58621	122.141	291.444	586.614	962.898	1583.08	2121.57	3111.76	3897.64		0.0426775	1303
TT23#03	0.2	0.016	0.02895	0.00074	0.0492	0.0035		184	13	183.9	4.6	180	160		17.1	0.114	2.61	5.2	2.47	29.5	8.5	73	28	113	20.5	206	40.9	185	330			TT23#03	0	27.9412	1.2	5.58887	33.9869	42.5862	143.552	227.273	287.402	494.7	682.779	803.922	1211.76	1610.24		0.609688	183.9
TT23#04	0.183	0.015	0.02595	0.00065	0.0503	0.0037		170	12	165.1	4.1	170	150	0.3	15.5	0.53	5.4	7.5	2.58	30.3	12	148	54.5	243	54.8	537	105	262	317			TT23#04	1.26582	25.3268	5.57895	11.5632	49.0196	44.4828	147.445	320.856	582.677	962.898	1468.28	2149.02	3158.82	4133.86		0.523229	165.1
TT23#05	0.212	0.011	0.03013	0.00062	0.051	0.0027		194.6	9.3	191.3	3.9	200	110	6.8	50.7	2.4	15.3	7.7	2.69	39.2	9.9	108	41	183	45.9	390	73.4	330	786			TT23#05	28.692	82.8431	25.2632	32.7623	50.3268	46.3793	190.754	264.706	425.197	724.382	1105.74	1800	2294.12	2889.76		0.473356	191.3
TT23#06	0.227	0.018	0.03185	0.00084	0.052	0.0045		206	15	202.1	5.2	190	170		45.8	0.35	5.9	10.8	5.5	56.8	15.6	175	63.6	277	67.1	571	121	285	244			TT23#06	0	74.8366	3.68421	12.6338	70.5882	94.8276	276.399	417.112	688.976	1123.67	1673.72	2631.37	3358.82	4763.78		0.678891	202.1
TT23#07	0.1942	0.0082	0.02757	0.00046	0.0509	0.0021		179.7	7	175.3	2.9	226	84	0.89	34.2	0.85	5.4	10.4	2.43	45.9	14.9	169	64.4	273	57.2	495	101	439	1019			TT23#07	3.75527	55.8824	8.94737	11.5632	67.9739	41.8966	223.358	398.396	665.354	1137.81	1649.55	2243.14	2911.76	3976.38		0.340022	175.3
TT23#08	0.1947	0.0074	0.02883	0.00054	0.0489	0.0018		180.3	6.3	183.2	3.4	127	79		18.4	0.019	0.56	3.2	1.16	19.8	6.72	85	34.4	156	40.4	414	80.6	270	1147			TT23#08	0	30.0654	0.2	1.19914	20.915	20	96.3504	179.679	334.646	607.774	942.598	1584.31	2435.29	3173.23		0.445527	183.2
TT23#09	0.211	0.014	0.03009	0.00077	0.051	0.0035		193	12	191.1	4.8	180	140	0.37	15.9	0.24	2.64	4.5	0.91	24.7	8.3	97	36.3	157	34.2	342	65.8	175	438			TT23#09	1.56118	25.9804	2.52632	5.6531	29.4118	15.6897	120.195	221.925	381.89	641.343	948.64	1341.18	2011.76	2590.55		0.263882	191.1
TT23#10	0.549	0.031	0.0625	0.0012	0.0635	0.0035		441	19	390.9	7.2	650	110	0.16	13.4	0.2	3.3	3.9	0.87	25.9	8.8	115	48	228	55.2	581	115	551	960			TT23#10	0.675105	21.8954	2.10526	7.06638	25.4902	15	126.034	235.294	452.756	848.057	1377.64	2164.71	3417.65	4527.56		0.264643	390.9
TT23#11	0.2138	0.0063	0.03031	0.00055	0.0512	0.0017		197.5	5.6	192.5	3.5	230	73	2.55	38.9	2.15	14.3	13.8	1.23	79	28.6	347	142	573	138	1170	201	607	1720			TT23#11	10.7595	63.5621	22.6316	30.621	90.1961	21.2069	384.428	764.706	1366.14	2508.83	3462.24	5411.76	6882.35	7913.39		0.113887	192.5
TT23#12	0.1902	0.009	0.02699	0.00058	0.0508	0.0021		176.3	7.7	171.7	3.6	206	91	0.5	220	1.29	11.3	14.6	4.2	102	34.1	435	155	602	126	1100	200	1140	1002			TT23#12	2.1097	359.477	13.5789	24.197	95.4248	72.4138	496.35	911.765	1712.6	2738.52	3637.46	4941.18	6470.59	7874.02		0.332733	171.7
TT23#13	0.208	0.015	0.02855	0.00068	0.0527	0.0041		191	13	181.4	4.2	240	160	0.09	19	0.088	2.21	4.8	1.99	23.9	9.1	105	38.1	162	38.9	361	71.2	185	480			TT23#13	0.379747	31.0458	0.926316	4.73233	31.3725	34.3103	116.302	243.316	413.386	673.145	978.852	1525.49	2123.53	2803.15		0.568012	181.4
TT23#14	0.241	0.022	0.0292	0.00075	0.0596	0.005		217	17	185.5	4.7	490	180		12.2	0.31	3.4	5	1.59	32.7	8.55	92	33.4	132	27.2	260	52.9	174	349			TT23#14	0	19.9346	3.26316	7.28051	32.6797	27.4138	159.124	228.61	362.205	590.106	797.583	1066.67	1529.41	2082.68		0.380156	185.5
TT23#15	0.22	0.013	0.02868	0.00064	0.0557	0.0033		201	11	182.3	4	370	130	0.84	227	0.81	6.5	13.7	3.52	120	37.3	467	191	747	143	1260	217	940	1118			TT23#15	3.5443	370.915	8.52632	13.9186	89.5425	60.6897	583.942	997.326	1838.58	3374.56	4513.6	5607.84	7411.76	8543.31		0.265409	182.3
TT23#16	5.3	0.1	0.3318	0.0054	0.1155	0.0022		1867	17	1847	26	1881	35		0.11		0.2	2.2	0.018	17.1	6.5	74	26.1	114	28.6	249	41.1	19.3	362			TT23#16	0	0.179739	0	0.428266	14.3791	0.310345	83.2117	173.797	291.339	461.131	688.822	1121.57	1464.71	1618.11		0.00897195	1847
TT23#17	0.212	0.017	0.0287	0.0012	0.0549	0.0039		196	13	182.4	7.6	320	150		75	0.18	4.6	8.5	2.79	64	17.2	217	79	319	73.7	796	151	356	342			TT23#17	0	122.549	1.89474	9.85011	55.5556	48.1034	311.436	459.893	854.331	1395.76	1927.49	2890.2	4682.35	5944.88		0.365703	182.4
TT23#18	0.192	0.016	0.02628	0.00069	0.0522	0.0043		177	14	167.2	4.4	240	170	14.1	59.2	4.58	20.8	9	0.9	29.4	12.1	138	58.7	259	57.8	506	104	341	728			TT23#18	59.4937	96.732	48.2105	44.5396	58.8235	15.5172	143.066	323.529	543.307	1037.1	1564.95	2266.67	2976.47	4094.49		0.16915	167.2
TT23#19	0.177	0.014	0.0263	0.00071	0.0491	0.0036		166	13	167.3	4.5	110	150	0.46	125	1.25	16.7	24.5	8.3	93	32.9	379	139	591	128	1280	236	1480	1230			TT23#19	1.94093	204.248	13.1579	35.7602	160.131	143.103	452.555	879.679	1492.13	2455.83	3571	5019.61	7529.41	9291.34		0.53159	167.3
TT23#20	0.211	0.02	0.0281	0.0012	0.0559	0.0058		192	17	178.5	7.8	310	210	1.83	42	2.33	12.9	13.9	5.9	55	14.9	175	79	303	69	680	131	540	750			TT23#20	7.72152	68.6275	24.5263	27.6231	90.8497	101.724	267.64	398.396	688.976	1395.76	1830.82	2705.88	4000	5157.48		0.652359	178.5
TT23#21	0.1855	0.0073	0.0267	0.0006	0.0505	0.0022		172.4	6.3	169.9	3.7	187	93	1.56	28.7	0.53	3.4	2.89	0.97	19.2	5.47	90	37.7	167	43.8	468	91.4	454	1260			TT23#21	6.58228	46.8954	5.57895	7.28051	18.8889	16.7241	93.4307	146.257	354.331	666.078	1009.06	1717.65	2752.94	3598.43		0.398103	169.9
TT23#22	0.188	0.011	0.02671	0.00059	0.0513	0.0031		174.5	9.1	169.9	3.7	220	130	0.84	23.8	0.34	3.9	6.4	1.57	41.2	14.1	175	61.2	265	54.5	477	86.6	415	739			TT23#22	3.5443	38.8889	3.57895	8.35118	41.8301	27.069	200.487	377.005	688.976	1081.27	1601.21	2137.25	2805.88	3409.45		0.295587	169.9
TT23#23	0.1876	0.0076	0.02675	0.00066	0.0517	0.0026		174.2	6.5	170.1	4.1	230	100	0.92	88	1.3	20.8	24.4	8.3	116	34.6	366	131	581	119	1090	201	808	912			TT23#23	3.88186	143.791	13.6842	44.5396	159.477	143.103	564.477	925.134	1440.94	2314.49	3510.57	4666.67	6411.76	7913.39		0.476955	170.1
TT23#24	0.221	0.027	0.0308	0.0014	0.0531	0.0066		198	23	195.3	8.8	150	240	0.031	11.2	0.18	2.09	4.6	1.51	26.1	6.96	87	31.3	140	30.7	281	51.9	52.5	126			TT23#24	0.130802	18.3007	1.89474	4.47537	30.0654	26.0345	127.007	186.096	342.52	553.004	845.921	1203.92	1652.94	2043.31		0.42131	195.3
TT23#25	0.212	0.02	0.02848	0.00099	0.0569	0.0061		199	19	181	6.2	320	200	2.5	35.7	1.05	7.2	7.3	1.55	39	9.8	146	55.2	216	52.1	463	87	371	555			TT23#25	10.5485	58.3333	11.0526	15.4176	47.7124	26.7241	189.781	262.032	574.803	975.265	1305.14	2043.14	2723.53	3425.2		0.280842	181
TT23#26	0.175	0.011	0.02664	0.00056	0.0476	0.0028		163.4	9.4	169.5	3.5	60	120	0.15	22.5	0.88	20.3	37	4.3	169	50.3	601	219	860	181	1560	268	707	1440			TT23#26	0.632911	36.7647	9.26316	43.469	241.83	74.1379	822.384	1344.92	2366.14	3869.26	5196.37	7098.04	9176.47	10551.2		0.166245	169.5
TT23#27	0.181	0.015	0.02749	0.0009	0.0477	0.004		170	14	174.8	5.7	70	170	0.32	22.5	2.65	39.5	56	12	215	43.2	394	101	295	51.5	430	68	558	730			TT23#27	1.35021	36.7647	27.8947	84.5824	366.013	206.897	1046.23	1155.08	1551.18	1784.45	1782.48	2019.61	2529.41	2677.17		0.334343	174.8
TT23#28	0.196	0.019	0.0304	0.0012	0.047	0.0045		179	16	193	7.2	20	190	0.18	60	0.15	5.7	8.1	2.51	35.5	12.5	194	64.6	292	62.8	587	94.3	292	403			TT23#28	0.759494	98.0392	1.57895	12.2056	52.9412	43.2759	172.749	334.225	763.78	1141.34	1764.35	2462.75	3452.94	3712.6		0.452523	193
TT23#29	0.198	0.014	0.02769	0.00077	0.052	0.0036		182	12	176.1	4.8	220	140	0.052	19	0.37	7.8	10.5	2.11	44	12.6	185	53	230	48	465	99	397	720			TT23#29	0.219409	31.0458	3.89474	16.7024	68.6275	36.3793	214.112	336.898	728.346	936.396	1389.73	1882.35	2735.29	3897.64		0.300113	176.1
TT23#30	0.19	0.014	0.02728	0.00079	0.05	0.0036		176	12	173.5	5	160	150	0.23	13.2	0.2	2.1	4.9	1.01	26.6	6.6	62	26.1	123	28	260	51.5	223	545			TT23#30	0.970464	21.5686	2.10526	4.49679	32.0261	17.4138	129.44	176.471	244.094	461.131	743.202	1098.04	1529.41	2027.56		0.270462	173.5
TT23#31	0.195	0.019	0.02682	0.00089	0.0529	0.0052		181	17	170.6	5.6	230	200		6	0.035	2.1	2.8	0.68	24.2	5.5	73	25.8	101	28.5	230	45.3	136	265			TT23#31	0	9.80392	0.368421	4.49679	18.3007	11.7241	117.762	147.059	287.402	455.83	610.272	1117.65	1352.94	1783.46		0.252549	170.6
TT23#32	0.182	0.014	0.02626	0.00092	0.0499	0.004		168	12	167	5.8	160	170		27.4		1.61	3.5	0.76	31	10.8	108	54	224	52	451	99	430	840			TT23#32	0	44.7712	0	3.44754	22.8758	13.1034	150.852	288.77	425.197	954.064	1353.47	2039.22	2652.94	3897.64		0.22306	167
TT23#33	0.322	0.02	0.0452	0.0015	0.052	0.0033		281	16	284.7	9.3	230	130	0.12	150	0.3	3.8	9.2	5.8	43	16.2	189	57.9	346	79	880	150	1010	561			TT23#33	0.506329	245.098	3.15789	8.13704	60.1307	100	209.246	433.155	744.094	1022.97	2090.63	3098.04	5176.47	5905.51		0.891504	284.7
TT23#34	0.217	0.015	0.03123	0.00078	0.0504	0.0036		198	12	198.2	4.9	150	140		17.5	0.15	4.4	6.5	0.057	37	12.6	172	55.6	220	48.6	449	70	472	626			TT23#34	0	28.5948	1.57895	9.42184	42.4837	0.982759	180.049	336.898	677.165	982.332	1329.31	1905.88	2641.18	2755.91		0.0112368	198.2
TT23#35	0.224	0.015	0.02866	0.00077	0.0569	0.004		204	12	182.1	4.8	390	150	2.2	11.1	0.9	5.7	3.8	0.76	22.7	6.3	90	33.4	155	34.7	342	68.7	126	662			TT23#35	9.2827	18.1373	9.47368	12.2056	24.8366	13.1034	110.462	168.449	354.331	590.106	936.556	1360.78	2011.76	2704.72		0.250168	182.1
TT23#37	0.191	0.014	0.02747	0.00089	0.0505	0.0032		176	11	174.6	5.6	190	140		10		1	0.74	0.63	11.3	4.3	46	20.5	84	20	218	47.2	136	548			TT23#37	0	16.3399	0	2.14133	4.8366	10.8621	54.9878	114.973	181.102	362.191	507.553	784.314	1282.35	1858.27		0.666053	174.6
TT23#38	0.193	0.01	0.02765	0.00048	0.0506	0.0027		179	8.7	175.8	3	180	110		14		0.28	2.04	0.56	12.6	5	72	31.8	137	29.2	361	71.6	161	930			TT23#38	0	22.8758	0	0.599572	13.3333	9.65517	61.3139	133.69	283.465	561.837	827.795	1145.1	2123.53	2818.9		0.337685	175.8
TT23#39	0.204	0.015	0.02834	0.0008	0.0526	0.0042		187	12	180.1	5	250	160		17.3	0.045	3.3	4.1	1.62	21.9	8.6	94	31	118	29.9	260	52.1	235	574			TT23#39	0	28.268	0.473684	7.06638	26.7974	27.931	106.569	229.947	370.079	547.703	712.991	1172.55	1529.41	2051.18		0.522666	180.1
TT23#40	0.203	0.017	0.0287	0.001	0.0518	0.0042		186	15	182.3	6.4	220	180		11.8	0.082	0.6	1.41	0.14	10.2	4.8	44	22.4	101	21.1	230	48.6	127	471			TT23#40	0	19.281	0.863158	1.2848	9.21569	2.41379	49.635	128.342	173.228	395.76	610.272	827.451	1352.94	1913.39		0.112861	182.3
TT23#41	0.211	0.019	0.02893	0.00099	0.0526	0.0044		195	16	183.8	6.2	240	170	0.059	17.3	0.15	3	6.3	1.32	39	10.1	139	44.9	190	47	405	75	266	451			TT23#41	0.248945	28.268	1.57895	6.42398	41.1765	22.7586	189.781	270.053	547.244	793.286	1148.04	1843.14	2382.35	2952.76		0.257451	183.8
TT23#42	0.196	0.012	0.0291	0.00075	0.0491	0.0032		180.5	9.9	184.9	4.7	110	130	0.43	27.3	0.9	8	11.4	3.58	51	15.6	171	55.8	236	55	499	106	505	1100			TT23#42	1.81435	44.6078	9.47368	17.1306	74.5098	61.7241	248.175	417.112	673.228	985.866	1425.98	2156.86	2935.29	4173.23		0.453909	184.9
TT23#43	0.195	0.015	0.02913	0.00082	0.0495	0.0041		179	13	185.1	5.2	100	160	0.041	83	0.34	7.7	6.6	2.92	58	17.4	198	74	360	84	790	161	760	920			TT23#43	0.172996	135.621	3.57895	16.4882	43.1373	50.3448	282.238	465.241	779.528	1307.42	2175.23	3294.12	4647.06	6338.58		0.456269	185.1
TT23#44	0.222	0.021	0.0312	0.0011	0.0511	0.0048		201	17	198	7	200	190		17.2		0.11	3.3	0.87	17.3	7.1	76	30.1	170	31.2	301	67	166	529			TT23#44	0	28.1046	0	0.235546	21.5686	15	84.1849	189.84	299.213	531.802	1027.19	1223.53	1770.59	2637.8		0.352016	198
TT23#45	0.171	0.02	0.02557	0.00088	0.0479	0.0053		158	17	162.7	5.5	20	210		98	0.21	7.2	12.9	3.87	43	11	113	36.6	148	38.9	309	67	624	438			TT23#45	0	160.131	2.21053	15.4176	84.3137	66.7241	209.246	294.118	444.882	646.643	894.26	1525.49	1817.65	2637.8		0.502349	162.7
TT23#46	5.11	0.13	0.3217	0.0067	0.1149	0.0025		1834	21	1797	33	1868	40		0.9	0.049	2.7	4.8		22.7	13.3	144	58	227	49.2	560	90	105	720			TT23#46	0	1.47059	0.515789	5.78158	31.3725	0	110.462	355.615	566.929	1024.73	1371.6	1929.41	3294.12	3543.31		0	1797
TT23#47	0.18	0.018	0.02837	0.00096	0.0466	0.0049		169	16	180.3	6	0	200		9.8		1.27	3	0.66	20.2	6.4	86	28.2	124	32.6	296	51.3	134	374			TT23#47	0	16.0131	0	2.71949	19.6078	11.3793	98.2968	171.123	338.583	498.233	749.245	1278.43	1741.18	2019.69		0.259198	180.3
TT23#48	0.185	0.013	0.02752	0.00068	0.0488	0.0034		171	11	175	4.3	110	140		12.9	0.066	0.71	3.5	1.48	44	17.3	199	69	272	63	540	110	621	1180			TT23#48	0	21.0784	0.694737	1.52034	22.8758	25.5172	214.112	462.567	783.465	1219.08	1643.5	2470.59	3176.47	4330.71		0.364607	175
TT23#49	0.195	0.019	0.02756	0.00098	0.0529	0.0044		179	16	175.2	6.2	290	160	0.51	46	1.43	16.9	24.9	7.3	104	25.4	293	111	447	96	810	167	534	622			TT23#49	2.1519	75.1634	15.0526	36.1884	162.745	125.862	506.083	679.144	1153.54	1961.13	2700.91	3764.71	4764.71	6574.8		0.438561	175.2
TT23#50	0.184	0.015	0.02813	0.00067	0.0475	0.004		170	13	178.8	4.2	20	160		9.5	0.014	1.4	0.22	0.68	12.5	3.4	58	21.3	111	31	283	78	129	920			TT23#50	0	15.5229	0.147368	2.99786	1.43791	11.7241	60.8273	90.9091	228.346	376.325	670.695	1215.69	1664.71	3070.87		1.25362	178.8
TT23#51	0.198	0.019	0.02757	0.00099	0.0527	0.0055		181	16	175.3	6.2	210	200	0.87	17.5	0.26	1.9	6.7	1.8	29	7.7	99	42	162	39.3	411	76	197	364			TT23#51	3.67089	28.5948	2.73684	4.06852	43.7908	31.0345	141.119	205.882	389.764	742.049	978.852	1541.18	2417.65	2992.13		0.394784	175.3
TT23#52	0.187	0.014	0.0198	0.0011	0.0688	0.0045		173	12	126.4	6.8	820	140	9.4	135	15	79	64	17.8	124	29.8	282	88	289	64	590	126	1590	1900			TT23#52	39.6624	220.588	157.895	169.165	418.301	306.897	603.406	796.791	1110.24	1554.77	1746.22	2509.8	3470.59	4960.63		0.610862	126.4
TT23#53	5.33	0.22	0.3295	0.0083	0.1173	0.0046		1874	33	1834	40	1894	71		0.36		0.33	4.1		31	13.9	167	60	256	43.5	454	86	38.5	260			TT23#53	0	0.588235	0	0.706638	26.7974	0	150.852	371.658	657.48	1060.07	1546.83	1705.88	2670.59	3385.83		0	1834
TT23#54	0.269	0.03	0.0381	0.0014	0.0513	0.0056		236	24	241.2	8.5	130	210		5.6		0.05	0.71		5	2.82	25.1	12.8	75	18.8	202	38.6	34.1	201			TT23#54	0	9.15033	0	0.107066	4.64052	0	24.3309	75.4011	98.8189	226.148	453.172	737.255	1188.24	1519.69		0	241.2
TT23#55	0.196	0.022	0.02704	0.00099	0.0531	0.0058		179	18	171.9	6.2	220	210	0.42	26.8	0.31	4.8	7.7	1.31	47	15.5	197	66	227	51	470	97	344	550			TT23#55	1.77215	43.7908	3.26316	10.2784	50.3268	22.5862	228.71	414.439	775.591	1166.08	1371.6	2000	2764.71	3818.9		0.210524	171.9
TT23#56	1.117	0.038	0.1232	0.0025	0.0656	0.0019		759	18	749	15	786	62	0.12	14.7		2.4	4.7		38.3	12.6	156	67	254	58.5	524	97	366	960			TT23#56	0.506329	24.0196	0	5.13919	30.719	0	186.375	336.898	614.173	1183.75	1534.74	2294.12	3082.35	3818.9		0	749
TT23#57	0.192	0.014	0.02642	0.0008	0.0526	0.0037		177	12	168.1	5	280	160	3	19.7	0.73	7	8.4	1.98	34.9	9.8	106	46.6	168	42.3	379	86	329	928			TT23#57	12.6582	32.1895	7.68421	14.9893	54.902	34.1379	169.83	262.032	417.323	823.322	1015.11	1658.82	2229.41	3385.83		0.353538	168.1
TT23#58	0.235	0.028	0.0307	0.0017	0.0573	0.0066		215	24	195	11	340	240	3.5	50.8	3.9	19.7	15.1	4	40.7	11.2	132	37.1	176	42.9	438	74.8	263	326			TT23#58	14.7679	83.0065	41.0526	42.1842	98.6928	68.9655	198.054	299.465	519.685	655.477	1063.44	1682.35	2576.47	2944.88		0.493285	195
TT23#59	0.1676	0.0079	0.02401	0.00054	0.0503	0.0024		157	6.9	152.9	3.4	180	100	2.61	70	2.45	11.8	13	4.2	49	19.6	229	86	318	85	762	161	880	2420			TT23#59	11.0127	114.379	25.7895	25.2677	84.9673	72.4138	238.443	524.064	901.575	1519.43	1921.45	3333.33	4482.35	6338.58		0.508749	152.9
TT23#60	0.253	0.023	0.0376	0.0013	0.0494	0.0047		226	19	238.1	7.8	80	190		28.5	0.051	0.5	1.15	0.29	9	1.18	25.2	8.9	51	14.6	162	37.2	229	436			TT23#60	0	46.5686	0.536842	1.07066	7.51634	5	43.7956	31.5508	99.2126	157.244	308.157	572.549	952.941	1464.57		0.275582	238.1
TT23#61	0.22	0.015	0.02821	0.00095	0.0577	0.0046		201	13	179.3	5.9	410	160	6.3	28	2.9	12.9	8.2	1.47	27.4	8.7	86	32.1	142	36.1	355	72	218	422			TT23#61	26.5823	45.7516	30.5263	27.6231	53.5948	25.3448	133.333	232.62	338.583	567.138	858.006	1415.69	2088.24	2834.65		0.299819	179.3
TT23#62	0.188	0.011	0.02657	0.00061	0.0514	0.0029		174.5	9.3	169	3.8	210	120	0.7	16.5	0.59	5.4	5.2	1.02	22.6	11.9	221	109	564	127	1120	208	295	1340			TT23#62	2.95359	26.9608	6.21053	11.5632	33.9869	17.5862	109.976	318.182	870.079	1925.8	3407.85	4980.39	6588.24	8188.98		0.287652	169
TT23#63	0.205	0.012	0.0285	0.00067	0.0519	0.003		189	10	181.2	4.2	240	120	0.14	32.3	0.43	4.6	5.8	1.61	21.6	9.6	111	44	198	50.8	439	86.8	408	1116			TT23#63	0.590717	52.7778	4.52632	9.85011	37.9085	27.7586	105.109	256.684	437.008	777.385	1196.37	1992.16	2582.35	3417.32		0.439753	181.2
TT23#64	0.2	0.017	0.02841	0.00082	0.0514	0.0045		183	15	180.5	5.1	200	180		9.1		2	4.1	0.54	25.5	10.9	139	49.1	179	46.2	439	76	179	441			TT23#64	0	14.8693	0	4.28266	26.7974	9.31034	124.088	291.444	547.244	867.491	1081.57	1811.76	2582.35	2992.13		0.161456	180.5
TT23#65	0.195	0.015	0.02712	0.00064	0.0519	0.004		180	13	172.5	4	200	160		19.1	0.14	1.09	1.57	0.56	15.7	7	72	30.2	126	32.1	276	61.8	197	677			TT23#65	0	31.2092	1.47368	2.33405	10.2614	9.65517	76.399	187.166	283.465	533.569	761.329	1258.82	1623.53	2433.07		0.344836	172.5
TT23#66	0.196	0.014	0.02917	0.0008	0.0484	0.0035		181	12	185.3	5	100	150	2.15	105	1.4	10	12.3	1.68	54	17.1	221	81	398	84	696	148	483	754			TT23#66	9.07173	171.569	14.7368	21.4133	80.3922	28.9655	262.774	457.219	870.079	1431.1	2404.83	3294.12	4094.12	5826.77		0.199289	185.3
TT23#67	0.186	0.014	0.0274	0.00077	0.0497	0.004		172	12	174.2	4.8	120	160		9	0.35	6.4	13.2	0.19	57	18.6	203	99	327	86	644	124	302	620			TT23#67	0	14.7059	3.68421	13.7045	86.2745	3.27586	277.372	497.326	799.213	1749.12	1975.83	3372.55	3788.24	4881.89		0.0211764	174.2
TT23#68	0.214	0.015	0.03007	0.00078	0.0508	0.0031		196	12	190.9	4.9	210	130	2.8	20.3	0.85	8	12.8	1.5	61	17.1	277	91	355	69	700	125	407	790			TT23#68	11.8143	33.1699	8.94737	17.1306	83.6601	25.8621	296.837	457.219	1090.55	1607.77	2145.02	2705.88	4117.65	4921.26		0.164114	190.9
TT23#69	0.198	0.016	0.02876	0.00081	0.0504	0.0041		182	13	182.7	5.1	140	160		14	0.015	1.52	2.8	1.4	19.3	7.5	81	27.9	104	29.5	285	58.9	191	520			TT23#69	0	22.8758	0.157895	3.25482	18.3007	24.1379	93.9173	200.535	318.898	492.933	628.399	1156.86	1676.47	2318.9		0.582229	182.7
TT23#70	0.191	0.017	0.02651	0.00071	0.0526	0.0047		176	14	168.7	4.5	220	190	0.1	58.5	0.34	4.9	13.5	8.2	91	29.2	319	119	489	109	968	180	437	498			TT23#70	0.421941	95.5882	3.57895	10.4925	88.2353	141.379	442.822	780.749	1255.91	2102.47	2954.68	4274.51	5694.12	7086.61		0.715237	168.7
TT23#71	0.217	0.019	0.02779	0.00087	0.0567	0.0051		197	16	176.7	5.5	370	190	1.69	23.2	0.62	3.8	7	1.84	43	12.3	167	52.3	221	44.9	443	75.3	286	580			TT23#71	7.1308	37.9085	6.52632	8.13704	45.7516	31.7241	209.246	328.877	657.48	924.028	1335.35	1760.78	2605.88	2964.57		0.324234	176.7
TT23#72	0.214	0.017	0.02913	0.00074	0.0526	0.0041		195	14	185.1	4.6	260	160	0.042	19.7	0.21	3.3	7.1	1.5	38.2	14.6	157	55	270	52.1	528	97	300	747			TT23#72	0.177215	32.1895	2.21053	7.06638	46.4052	25.8621	185.888	390.374	618.11	971.731	1631.42	2043.14	3105.88	3818.9		0.278454	185.1
TT23#73	0.423	0.028	0.0569	0.0016	0.0544	0.0039		358	19	356.6	9.5	330	140	0.019	48	0.16	3.7	9.5	3.95	60	21	266	98	397	93.5	867	152	275	293			TT23#73	0.0801688	78.4314	1.68421	7.92291	62.0915	68.1034	291.971	561.497	1047.24	1731.45	2398.79	3666.67	5100	5984.25		0.505805	356.6
TT23#74	0.213	0.021	0.02967	0.00094	0.0527	0.0056		193	18	188.4	5.9	170	210	0.09	14.4	0.23	2.5	6.8	0.69	22.6	8.3	108	46	155	34.2	371	69	169	500			TT23#74	0.379747	23.5294	2.42105	5.35332	44.4444	11.8966	109.976	221.925	425.197	812.721	936.556	1341.18	2182.35	2716.54		0.170163	188.4
TT23#75	0.193	0.011	0.02753	0.00061	0.0515	0.0029		178.6	9.1	175	3.8	210	120	0.024	11.4	0.16	3.5	6.9		55	19.4	226	97	378	88	820	147	444	1140			TT23#75	0.101266	18.6275	1.68421	7.49465	45.098	0	267.64	518.717	889.764	1713.78	2283.99	3450.98	4823.53	5787.4		0	175
TT23#76	0.203	0.016	0.02787	0.00092	0.0527	0.004		186	13	177.2	5.7	250	160	2.5	42	2.2	11.2	3.9	0.82	21.8	11.2	139	76	320	77	710	134	440	1280			TT23#76	10.5485	68.6275	23.1579	23.9829	25.4902	14.1379	106.083	299.465	547.244	1342.76	1933.53	3019.61	4176.47	5275.59		0.27188	177.2
TT23#77	0.365	0.034	0.0482	0.0016	0.0552	0.0053		310	26	304	10	290	190	0.18	12.6	0.079	0.12	1.2	0.82	11.6	2.9	66	33.5	174	51	530	127	100	329			TT23#77	0.759494	20.5882	0.831579	0.256959	7.84314	14.1379	56.4477	77.5401	259.843	591.873	1051.36	2000	3117.65	5000		0.67192	304
TT23#78	0.239	0.021	0.02836	0.00078	0.0616	0.0057		215	17	180.2	4.9	500	190	0.08	15.4	0.058	2.9	4.6	0.5	32.1	9.3	112	45.2	190	44.9	447	88	221	424			TT23#78	0.337553	25.1634	0.610526	6.20985	30.0654	8.62069	156.204	248.663	440.945	798.587	1148.04	1760.78	2629.41	3464.57		0.125795	180.2
TT23#79	0.21	0.026	0.0278	0.0012	0.055	0.0069		191	22	176.9	7.5	270	260		12.7	0.021	2.2	5.9	0.89	43	13.8	178	66	275	59	580	99	165	380			TT23#79	0	20.7516	0.221053	4.71092	38.5621	15.3448	209.246	368.984	700.787	1166.08	1661.63	2313.73	3411.76	3897.64		0.170826	176.9
TT23#80	0.199	0.018	0.0297	0.0012	0.0487	0.0045		182	15	188.7	7.7	80	180		17.6	0.33	3.2	5.4	2.3	41	10.6	102	37.1	161	38.2	319	77.4	293	455			TT23#80	0	28.7582	3.47368	6.85225	35.2941	39.6552	199.513	283.422	401.575	655.477	972.81	1498.04	1876.47	3047.24		0.472566	188.7
TT23#81	0.188	0.018	0.02789	0.00084	0.0493	0.005		175	16	177.3	5.2	100	200	0.2	8	0.17	2.2	3.9	1	33	12.1	165	53.5	258	57.9	520	98	298	579			TT23#81	0.843882	13.0719	1.78947	4.71092	25.4902	17.2414	160.584	323.529	649.606	945.23	1558.91	2270.59	3058.82	3858.27		0.269485	177.3
TT23#82	0.207	0.02	0.02789	0.00098	0.0544	0.0053		188	17	177.3	6.1	260	200	18.4	49	3.8	14.2	4.4	1.21	36	10.1	105	37.5	181	38.7	463	89	385	740			TT23#82	77.6371	80.0654	40	30.4069	28.7582	20.8621	175.182	270.053	413.386	662.544	1093.66	1517.65	2723.53	3503.94		0.293922	177.3
TT23#83	0.189	0.016	0.02709	0.00099	0.05	0.0041		174	14	172.2	6.2	120	160	2	77	2.11	16.2	14.3	4.5	39	13.9	159	79	286	79	710	133	430	870			TT23#83	8.43882	125.817	22.2105	34.6895	93.4641	77.5862	189.781	371.658	625.984	1395.76	1728.1	3098.04	4176.47	5236.22		0.582554	172.2
TT23#84	0.193	0.018	0.0282	0.001	0.0504	0.0048		177	15	179.1	6.3	120	190	0.2	21.2	0.1	1.9	3	0.74	13.7	6.5	85	30.6	153	34.4	334	60	400	439			TT23#84	0.843882	34.6405	1.05263	4.06852	19.6078	12.7586	66.6667	173.797	334.646	540.636	924.471	1349.02	1964.71	2362.2		0.352886	179.1
TT23#85	0.194	0.018	0.0278	0.001	0.0502	0.0048		181	16	176.8	6.5	170	200	0.48	28	1.16	4.3	11.9	2.22	51	14.3	142	64	227	48	480	102	365	770			TT23#85	2.02532	45.7516	12.2105	9.20771	77.7778	38.2759	248.175	382.353	559.055	1130.74	1371.6	1882.35	2823.53	4015.75		0.275498	176.8
TT23#86	0.16	0.025	0.0262	0.0012	0.0472	0.0076		155	24	166.8	7.6	-100	280		11.1	0.076	3.2	6.2	1.23	35	11.1	124	45.3	183	46.4	366	73	109	190			TT23#86	0	18.1373	0.8	6.85225	40.5229	21.2069	170.316	296.791	488.189	800.353	1105.74	1819.61	2152.94	2874.02		0.255269	166.8
TT23#87	0.222	0.019	0.0306	0.0011	0.0528	0.0044		201	15	194.5	6.6	250	170		22.3	0.069	2.5	7.2	1.59	34	10.3	144	45.3	198	48.9	485	96	316	515			TT23#87	0	36.4379	0.726316	5.35332	47.0588	27.4138	165.45	275.401	566.929	800.353	1196.37	1917.65	2852.94	3779.53		0.310681	194.5
TT23#88	0.329	0.056	0.0293	0.0018	0.084	0.015		276	41	186	12	850	360	6.6	62	1.16	6.4	4.6	2.25	23.7	11.1	144	70	249	47	500	91	196	197			TT23#88	27.8481	101.307	12.2105	13.7045	30.0654	38.7931	115.328	296.791	566.929	1236.75	1504.53	1843.14	2941.18	3582.68		0.658799	186
TT23#89	0.187	0.015	0.02712	0.00087	0.0499	0.004		172	13	172.4	5.4	150	170		12.8	0.54	11.7	23.9	1.08	156	42.7	500	156	820	161	1410	301	990	1200			TT23#89	0	20.915	5.68421	25.0535	156.209	18.6207	759.124	1141.71	1968.5	2756.18	4954.68	6313.73	8294.12	11850.4		0.0540737	172.4
TT23#90	0.197	0.02	0.0297	0.0012	0.0484	0.005		180	17	188.7	7.5	80	210	0.028	26.7	0.27	1.7	6.7	2.4	34	10.1	105	42	228	46	441	90	362	610			TT23#90	0.118143	43.6275	2.84211	3.64026	43.7908	41.3793	165.45	270.053	413.386	742.049	1377.64	1803.92	2594.12	3543.31		0.486136	188.7
TT23#91	0.218	0.025	0.0267	0.0011	0.0602	0.0075		197	21	169.8	7	420	250	28	89	8.6	36.9	8.9	1.89	48	7.2	84	40.2	183	36.2	413	82	329	470			TT23#91	118.143	145.425	90.5263	79.015	58.1699	32.5862	233.577	192.513	330.709	710.247	1105.74	1419.61	2429.41	3228.35		0.279557	169.8
TT23#92	0.196	0.016	0.02727	0.00097	0.0527	0.0043		180	13	173.4	6.1	230	160		3.9	0.063	0.41	2.3	0.02	18	12.6	95	43	232	47.5	520	108	208	790			TT23#92	0	6.37255	0.663158	0.877944	15.0327	0.344828	87.5912	336.898	374.016	759.717	1401.81	1862.75	3058.82	4251.97		0.00950284	173.4
TT23#93	0.174	0.012	0.02528	0.0008	0.0502	0.0033		164.1	9.8	160.9	5	180	130	0.31	31.1	0.3	6.6	11	2.9	69	18	159	55	238	55	455	84	490	1110			TT23#93	1.30802	50.817	3.15789	14.1328	71.8954	50	335.766	481.283	625.984	971.731	1438.07	2156.86	2676.47	3307.09		0.321811	160.9
TT23#94	0.196	0.017	0.02405	0.00085	0.059	0.0048		180	14	153.2	5.4	450	170	1.27	18.2	0.96	9.2	6	1.69	26.5	8.5	107	37.3	182	34	366	72	278	749			TT23#94	5.35865	29.7386	10.1053	19.7002	39.2157	29.1379	128.954	227.273	421.26	659.011	1099.7	1333.33	2152.94	2834.65		0.409743	153.2
TT23#95	0.194	0.016	0.02838	0.00078	0.0492	0.004		178	13	180.4	4.9	130	170	1.01	38.5	0.32	5.9	8.9	1.9	60	23.2	229	86	338	69	630	127	640	730			TT23#95	4.2616	62.9085	3.36842	12.6338	58.1699	32.7586	291.971	620.321	901.575	1519.43	2042.3	2705.88	3705.88	5000		0.251366	180.4
TT23#96	0.181	0.011	0.02665	0.00077	0.049	0.0029		168.4	9.4	169.5	4.8	140	130	11.3	122	5	39.6	37.3	7.4	116	46	513	168	720	162	1490	295	1380	1280			TT23#96	47.6793	199.346	52.6316	84.7966	243.791	127.586	564.477	1229.95	2019.69	2968.2	4350.45	6352.94	8764.71	11614.2		0.343931	169.5
TT23#97	0.213	0.02	0.0297	0.001	0.0516	0.005		193	17	188.8	6.5	190	190		25	0.1	0.4	3.6	0.48	16.7	6	66	26.1	129	32.7	317	76	282	504			TT23#97	0	40.8497	1.05263	0.856531	23.5294	8.27586	81.2652	160.428	259.843	461.131	779.456	1282.35	1864.71	2992.13		0.189258	188.8
TT23#98	0.196	0.016	0.02846	0.00086	0.0503	0.0042		180	13	180.8	5.4	130	170	2.9	51	3.6	12.7	20.2	4	31	10.9	108	47	203	51	490	90	630	1100			TT23#98	12.2363	83.3333	37.8947	27.1949	132.026	68.9655	150.852	291.444	425.197	830.389	1226.59	2000	2882.35	3543.31		0.488683	180.8
TT23#99	0.244	0.02	0.0339	0.0012	0.0525	0.0043		219	17	214.8	7.3	220	160	0.025	8	0.42	2.9	1.3	1.05	11.6	2.8	42	20.7	95	21.2	236	58	225	680			TT23#99	0.105485	13.0719	4.42105	6.20985	8.49673	18.1034	56.4477	74.8663	165.354	365.724	574.018	831.373	1388.24	2283.46		0.826632	214.8
TT23#100	0.184	0.011	0.02563	0.00057	0.052	0.0031		170.4	9.4	163.1	3.6	250	130	1.78	133	2.73	19.5	35	7.3	111	33.4	380	121	470	101	1040	196	1730	1840			TT23#100	7.51055	217.32	28.7368	41.7559	228.758	125.862	540.146	893.048	1496.06	2137.81	2839.88	3960.78	6117.65	7716.54		0.358056	163.1
TT23#101	0.19	0.018	0.02451	0.00075	0.0564	0.0055		175	16	156.1	4.7	370	210		17.2	0.15	3.8	7.4	1.13	43	14.5	181	59	295	71	530	103	322	770			TT23#101	0	28.1046	1.57895	8.13704	48.366	19.4828	209.246	387.701	712.598	1042.4	1782.48	2784.31	3117.65	4055.12		0.193665	156.1
TT23#102	0.204	0.022	0.02753	0.00092	0.0532	0.0057		186	18	175	5.8	230	210		8.3	0.16	4.1	5.3	1.11	30	9.6	116	35.9	126	31.8	280	65	151	488			TT23#102	0	13.5621	1.68421	8.77944	34.6405	19.1379	145.985	256.684	456.693	634.276	761.329	1247.06	1647.06	2559.06		0.269121	175
TT23#103	0.195	0.013	0.02866	0.00067	0.0496	0.0031		180	11	182.1	4.2	130	130	0.087	128	0.32	2.9	7.3	1.4	50	20.3	281	134	560	137	1290	220	910	1100			TT23#103	0.367089	209.15	3.36842	6.20985	47.7124	24.1379	243.309	542.781	1106.3	2367.49	3383.69	5372.55	7588.24	8661.42		0.22403	182.1
TT23#104	0.268	0.017	0.03771	0.00084	0.051	0.0031		239	13	238.6	5.2	210	130		7.5	0.74	4.2	6.2	1.16	44	19.7	245	85	392	94	800	160	436	674			TT23#104	0	12.2549	7.78947	8.99358	40.5229	20	214.112	526.738	964.567	1501.77	2368.58	3686.27	4705.88	6299.21		0.214714	238.6
TT23#105	0.2	0.012	0.02849	0.0008	0.0514	0.0031		184.7	9.7	181.1	5	210	120	1.14	20.5	1.08	6.1	6.3	1.85	20.5	8.6	98	48.2	196	44	457	104	352	1580			TT23#105	4.81013	33.4967	11.3684	13.0621	41.1765	31.8966	99.7567	229.947	385.827	851.59	1184.29	1725.49	2688.24	4094.49		0.497678	181.1
TT23#106	0.211	0.022	0.02829	0.00089	0.054	0.006		192	19	179.8	5.6	250	220	0.021	10.4	0.43	6.3	8.3	1.61	34.8	14.7	143	51.9	239	51.6	433	96	198	515			TT23#106	0.0886076	16.9935	4.52632	13.4904	54.2484	27.7586	169.343	393.048	562.992	916.961	1444.11	2023.53	2547.06	3779.53		0.289615	179.8
TT23#107	0.236	0.055	0.0289	0.002	0.061	0.016		210	46	183	12	170	430		20.2	0.1	2.2	2.5	2.06	17.7	6.5	72	28.1	117	31.8	294	63	78	97			TT23#107	0	33.0065	1.05263	4.71092	16.3399	35.5172	86.1314	173.797	283.465	496.466	706.949	1247.06	1729.41	2480.31		0.946748	183
TT23#108	0.203	0.021	0.0282	0.0012	0.0525	0.0046		187	18	179	7.5	260	190	0.12	34	0.21	5.1	9.3	0.39	55	19.6	239	79	410	83	800	154	600	940			TT23#108	0.506329	55.5556	2.21053	10.9208	60.7843	6.72414	267.64	524.064	940.945	1395.76	2477.34	3254.9	4705.88	6062.99		0.0527188	179
TT23#109	0.209	0.018	0.0309	0.001	0.0494	0.0044		191	15	196	6.4	90	170	0.028	25.8	0.25	3.5	3.8	1.24	23.3	9.9	111	40.3	207	40.3	429	91	274	810			TT23#109	0.118143	42.1569	2.63158	7.49465	24.8366	21.3793	113.382	264.706	437.008	712.014	1250.76	1580.39	2523.53	3582.68		0.40288	196
TT23#110	0.215	0.018	0.0294	0.00091	0.0534	0.0047		196	15	186.8	5.7	240	170		14.4	0.132	1.03	5.7	0.63	34	10.8	139	68	280	63	670	116	337	810			TT23#110	0	23.5294	1.38947	2.20557	37.2549	10.8621	165.45	288.77	547.244	1201.41	1691.84	2470.59	3941.18	4566.93		0.138353	186.8
TT23#111	0.197	0.011	0.02774	0.00059	0.052	0.0032		181.4	9.6	176.4	3.7	230	130		17.2		0.83	1.9	0.99	23.1	8.9	102	49	240	48	530	128	590	1970			TT23#111	0	28.1046	0	1.7773	12.4183	17.069	112.409	237.968	401.575	865.724	1450.15	1882.35	3117.65	5039.37		0.456853	176.4
TT23#112	0.201	0.017	0.02877	0.00095	0.052	0.0044		185	14	182.8	5.9	200	170		14.6	0.22	6.1	11.2	2.7	44	12	145	45.2	199	39.4	385	81	289	750			TT23#112	0	23.8562	2.31579	13.0621	73.2026	46.5517	214.112	320.856	570.866	798.587	1202.42	1545.1	2264.71	3188.98		0.371837	182.8
TT23#113	0.19	0.014	0.02745	0.00065	0.0493	0.0036		175	12	174.6	4.1	140	150	0.1	26	0.16	2.3	3.1	0.96	19.4	5.8	60	28.8	99	32.4	294	61	384	920			TT23#113	0.421941	42.4837	1.68421	4.92505	20.2614	16.5517	94.4039	155.08	236.22	508.834	598.187	1270.59	1729.41	2401.57		0.378454	174.6
TT23#114	0.204	0.054	0.0272	0.0028	0.071	0.021		183	47	172	17	150	520		15.9	0.19	4.3	8.6	3.2	26	7.6	93	38	129	34.2	263	68	135	62			TT23#114	0	25.9804	2	9.20771	56.2092	55.1724	126.521	203.209	366.142	671.378	779.456	1341.18	1547.06	2677.17		0.654241	172
TT23#115	0.201	0.019	0.02893	0.0008	0.0506	0.0047		184	16	183.8	5	140	180		13.5	0.09	2.2	5	1.81	36	13.9	139	66	247	62	491	104	477	540			TT23#115	0	22.0588	0.947368	4.71092	32.6797	31.2069	175.182	371.658	547.244	1166.08	1492.45	2431.37	2888.24	4094.49		0.412445	183.8
TT31#01	0.411	0.04	0.0425	0.0013	0.0706	0.0062		350	29	267.9	8	810	170		18.8	0.52	6.5	14	5.35	80	23.2	311	98	451	100.7	862	182	174	273			TT31#01	0	30.719	5.47368	13.9186	91.5033	92.2414	389.294	620.321	1224.41	1731.45	2725.08	3949.02	5070.59	7165.35		0.488729	267.9
TT31#02	0.257	0.012	0.03113	0.00064	0.0598	0.0032		231.7	9.8	197.6	4	530	110	2.73	24.2	1.99	9	6.2	1.35	21.3	7.2	99	43	185	54	491	99	352	1039			TT31#02	11.519	39.5425	20.9474	19.2719	40.5229	23.2759	103.65	192.513	389.764	759.717	1117.82	2117.65	2888.24	3897.64		0.359147	197.6
TT31#03	0.219	0.016	0.03148	0.0009	0.0497	0.0036		200	13	199.7	5.6	180	160		16.1	0.084	1.91	5.7	0.65	34.5	10.4	132	53.7	221	53.1	422	86.7	173	324			TT31#03	0	26.3072	0.884211	4.08994	37.2549	11.2069	167.883	278.075	519.685	948.763	1335.35	2082.35	2482.35	3413.39		0.141707	199.7
TT31#04	0.228	0.012	0.03221	0.00078	0.0507	0.0027		208	10	204.4	4.9	200	120	0.035	6.8	0.2	1.99	3.5	0.28	15.9	6.4	80	33.7	182	53.9	533	117	104	707			TT31#04	0.147679	11.1111	2.10526	4.26124	22.8758	4.82759	77.3723	171.123	314.961	595.406	1099.7	2113.73	3135.29	4606.3		0.114749	204.4
TT31#05	0.719	0.026	0.0878	0.0017	0.0594	0.0022		548	15	542.5	9.9	548	83		13		1.1	1.44	0.5	11.6	4.05	46.8	20.4	93	25.2	234	56.7	158	285			TT31#05	0	21.2418	0	2.35546	9.41176	8.62069	56.4477	108.289	184.252	360.424	561.934	988.235	1376.47	2232.28		0.37401	542.5
TT31#06	0.338	0.019	0.0451	0.001	0.0537	0.0032		294	15	284.4	6.3	310	130		14.4	0.008	0.72	2.86	0.13	20.3	7.9	100	45.9	253	63.2	608	128	219	583			TT31#06	0	23.5294	0.0842105	1.54176	18.6928	2.24138	98.7835	211.23	393.701	810.954	1528.7	2478.43	3576.47	5039.37		0.0521598	284.4
TT31#07	0.2737	0.0096	0.03843	0.00072	0.0511	0.0016		245.1	7.6	243.1	4.5	228	68		16.3		0.41	0.96	0.4	10.2	4.23	52.4	20.1	106	26	270	64.4	298	1019			TT31#07	0	26.634	0	0.877944	6.27451	6.89655	49.635	113.102	206.299	355.124	640.483	1019.61	1588.24	2535.43		0.390794	243.1
TT31#08	0.834	0.072	0.0907	0.0059	0.0658	0.0033		604	39	558	35	766	98		2.21	0.2	4.2	8.8	1.61	37.8	11.5	130	50.7	221	47.5	466	91	51.6	189			TT31#08	0	3.61111	2.10526	8.99358	57.5163	27.7586	183.942	307.487	511.811	895.76	1335.35	1862.75	2741.18	3582.68		0.269875	558
TT31#09	0.231	0.014	0.0295	0.0011	0.0562	0.0025		210	11	187.4	6.6	420	100	0.55	2.74	0.42	3.49	3.39	0.98	12	4.26	58	30.6	161	51.6	557	122	47.4	848			TT31#09	2.32068	4.47712	4.42105	7.47323	22.1569	16.8966	58.3942	113.904	228.346	540.636	972.81	2023.53	3276.47	4803.15		0.469742	187.4
TT31#10	1.499	0.041	0.1513	0.0025	0.0711	0.0017		928	17	908	14	947	50		10.4	0.183	3.03	7.5	0.46	38.8	12.9	149	59.7	231	52.8	428	79	310	484			TT31#10	0	16.9935	1.92632	6.48822	49.0196	7.93103	188.808	344.92	586.614	1054.77	1395.77	2070.59	2517.65	3110.24		0.0824394	908
TT31#11	0.249	0.016	0.03404	0.00083	0.0527	0.0034		225	13	215.8	5.2	260	130		21.5	0.081	1.62	2.73	0.98	15.9	4.91	65.1	27.7	131	34.3	349	71.9	228	348			TT31#11	0	35.1307	0.852632	3.46895	17.8431	16.8966	77.3723	131.283	256.299	489.399	791.541	1345.1	2052.94	2830.71		0.454747	215.8
TT31#12	0.314	0.011	0.04324	0.00079	0.0523	0.0017		276.8	8.4	272.8	4.9	274	72		7.5	0.107	1.81	2.43	1.5	17.1	5.37	87	34.2	188	47.7	564	136	724	1430			TT31#12	0	12.2549	1.12632	3.8758	15.8824	25.8621	83.2117	143.583	342.52	604.24	1135.95	1870.59	3317.65	5354.33		0.7114	272.8
TT31#13	0.301	0.011	0.04178	0.00083	0.0517	0.0017		266.5	8.4	263.8	5.1	253	71	0.2	54.6	0.33	5.6	14	2.65	88	32.6	367	157	699	141	1490	242	773	1310			TT31#13	0.843882	89.2157	3.47368	11.9914	91.5033	45.6897	428.224	871.658	1444.88	2773.85	4223.56	5529.41	8764.71	9527.56		0.230815	263.8
TT31#14	0.258	0.017	0.0355	0.0011	0.0533	0.0037		234	15	224.6	6.6	280	150		8.7		0.07	1.39	0.39	8.5	2.28	31.3	14.9	57.1	16.5	163	39.7	90	244			TT31#14	0	14.2157	0	0.149893	9.08497	6.72414	41.3625	60.9626	123.228	263.251	345.015	647.059	958.824	1562.99		0.346874	224.6
TT31#15	0.305	0.017	0.0412	0.001	0.0535	0.0031		269	13	260.5	6.4	300	120	0.034	12.9	0.35	7.1	10.8	2.3	68.6	21.4	268	96	423	82.9	850	159	273	462			TT31#15	0.14346	21.0784	3.68421	15.2034	70.5882	39.6552	333.82	572.193	1055.12	1696.11	2555.89	3250.98	5000	6259.84		0.258332	260.5
TT31#16	1.429	0.04	0.1475	0.0036	0.0695	0.0014		899	16	886	20	913	45		4		0.05	1.19	0.091	4.3	1.78	28.5	12.5	63.1	17	197	47.3	95	1210			TT31#16	0	6.53595	0	0.107066	7.77778	1.56897	20.9246	47.5936	112.205	220.848	381.269	666.667	1158.82	1862.2		0.122986	886
TT31#17	0.597	0.034	0.0772	0.0018	0.0559	0.0034		472	22	480	11	390	130		25.5		0.99	2.43	0.54	9.7	2.76	32	14.8	59.7	15.3	142	28.8	112	138.8			TT31#17	0	41.6667	0	2.11991	15.8824	9.31034	47.2019	73.7968	125.984	261.484	360.725	600	835.294	1133.86		0.340039	480
TT31#18	0.24	0.01	0.03486	0.00066	0.0497	0.002		217.6	8.2	220.9	4.1	176	88	0.036	28.5	0.42	7.4	10.2	1.84	56.8	17.7	217	77.9	386	79.2	903	150	543	985			TT31#18	0.151899	46.5686	4.42105	15.8458	66.6667	31.7241	276.399	473.262	854.331	1376.33	2332.33	3105.88	5311.76	5905.51		0.233705	220.9
TT31#19	0.22	0.011	0.03084	0.00071	0.0507	0.0021		201	9	195.8	4.4	220	93		54.9	0.32	5	10.7	1.7	75	23.9	240	90.2	360	74.5	617	115	970	917			TT31#19	0	89.7059	3.36842	10.7066	69.9346	29.3103	364.964	639.037	944.882	1593.64	2175.23	2921.57	3629.41	4527.56		0.183464	195.8
TT31#20	0.299	0.014	0.04081	0.00082	0.0529	0.0025		265	11	257.8	5.1	280	100		44.9	0.118	3.25	7.7	2.34	55.3	17.6	222	90.9	386	95.6	883	172	541	525			TT31#20	0	73.366	1.24211	6.95931	50.3268	40.3448	269.1	470.588	874.016	1606.01	2332.33	3749.02	5194.12	6771.65		0.346682	257.8
TT31#21	0.223	0.025	0.0294	0.0012	0.0539	0.006		202	21	187	7.3	290	240	0.013	50.1	0.74	12.1	17	7.1	88	28.4	263	105	452	80.8	744	137	235	156			TT31#21	0.0548523	81.8627	7.78947	25.9101	111.111	122.414	428.224	759.358	1035.43	1855.12	2731.12	3168.63	4376.47	5393.7		0.561198	187
TT31#22	0.353	0.023	0.0428	0.001	0.0594	0.0039		305	17	270.2	6.4	510	140	81	207	25.5	126	30.3	4.17	73	14.5	168	66.5	249	59	492	102	221	230			TT31#22	341.772	338.235	268.421	269.807	198.039	71.8966	355.231	387.701	661.417	1174.91	1504.53	2313.73	2894.12	4015.75		0.271067	270.2
TT31#23	0.405	0.022	0.0546	0.0012	0.0534	0.0028		344	16	342.9	7.4	300	110		17.3	0.088	3.2	4.1	0.85	29.2	9.3	126	48.4	228	50.8	524	102	220	326			TT31#23	0	28.268	0.926316	6.85225	26.7974	14.6552	142.092	248.663	496.063	855.124	1377.64	1992.16	3082.35	4015.75		0.237498	342.9
TT31#24	0.218	0.016	0.02971	0.00099	0.0531	0.0036		199	13	188.7	6.2	290	150	210	380	59	310	68	1.76	67	18.1	185	62.3	294	64.8	529	106.1	279	543			TT31#24	886.076	620.915	621.053	663.812	444.444	30.3448	326.034	483.957	728.346	1100.71	1776.44	2541.18	3111.76	4177.17		0.0797158	188.7
TT31#25	0.293	0.016	0.04082	0.00098	0.0521	0.0033		260	13	257.9	6.1	240	130		23.8		0.17	0.92	0.27	5.1	1.47	28.5	13.5	67.4	21.5	256	61.6	180	325			TT31#25	0	38.8889	0	0.364026	6.01307	4.65517	24.8175	39.3048	112.205	238.516	407.251	843.137	1505.88	2425.2		0.381073	257.9
TT31#26	0.219	0.014	0.02999	0.00084	0.0527	0.0035		200	12	190.5	5.3	260	140		7.2	0.107	3.37	5.6	0.77	28.9	9.2	117	44.9	194	45	418	73.3	117	369			TT31#26	0	11.7647	1.12632	7.21627	36.6013	13.2759	140.633	245.989	460.63	793.286	1172.21	1764.71	2458.82	2885.83		0.185042	190.5
TT31#27	0.2156	0.009	0.02919	0.00065	0.0534	0.0023		197.9	7.6	185.5	4	313	95	0.084	72.2	0.34	5.6	15.6	0.96	100	33.5	381	139	554	110	951	166	561	833			TT31#27	0.35443	117.974	3.57895	11.9914	101.961	16.5517	486.618	895.722	1500	2455.83	3347.43	4313.73	5594.12	6535.43		0.0743075	185.5
TT31#28	1.761	0.062	0.1709	0.0058	0.0746	0.0013		1027	23	1016	32	1050	35	2.6	5.3	1.06	7.5	9.3	2.77	61	25	254	66.7	251	44.8	371	59.6	70	1038			TT31#28	10.9705	8.66013	11.1579	16.06	60.7843	47.7586	296.837	668.449	1000	1178.45	1516.62	1756.86	2182.35	2346.46		0.355547	1016
TT31#29	0.316	0.025	0.0414	0.0013	0.0551	0.0045		276	19	261.5	7.8	310	160		12.1		0.66	2.07	0.41	14.9	3.03	49.7	20.2	97	25	266	58.9	119	179			TT31#29	0	19.7712	0	1.41328	13.5294	7.06897	72.5061	81.016	195.669	356.89	586.103	980.392	1564.71	2318.9		0.225699	261.5
TT31#30	0.556	0.034	0.0713	0.0033	0.0571	0.0028		450	23	444	20	450	110	0.45	14	0.193	1.49	1.67	0.23	10.6	3.7	38.1	15.5	65.7	17.5	173	38.6	122	363			TT31#30	1.89873	22.8758	2.03158	3.19058	10.915	3.96552	51.5815	98.9305	150	273.852	396.979	686.275	1017.65	1519.69		0.167125	444
TT31#31	0.305	0.011	0.04157	0.00091	0.0529	0.0018		269.5	8.7	262.5	5.6	303	76	0.18	24.5	0.96	15.7	28.3	3.52	131	40	467	162	653	125.3	1190	193	715	1121			TT31#31	0.759494	40.0327	10.1053	33.6188	184.967	60.6897	637.47	1069.52	1838.58	2862.19	3945.62	4913.73	7000	7598.43		0.176741	262.5
TT31#32	0.291	0.028	0.0385	0.0016	0.0548	0.0049		257	22	243	10	340	190		7.9	0.21	2.9	4.6	0.94	28.5	7.9	90	36.3	153	32.1	285	53.1	112	190			TT31#32	0	12.9085	2.21053	6.20985	30.0654	16.2069	138.686	211.23	354.331	641.343	924.471	1258.82	1676.47	2090.55		0.250986	243
TT31#33	0.184	0.034	0.0288	0.0014	0.0461	0.0088		165	29	183	8.9	-130	330		4.9		0.16	0.31	0.33	4.5	0.87	10.3	6	21.2	5.2	63	12.6	30.2	44.7			TT31#33	0	8.00654	0	0.342612	2.02614	5.68966	21.8978	23.262	40.5512	106.007	128.097	203.922	370.588	496.063		0.854182	183
TT31#34	0.614	0.058	0.0729	0.0023	0.0609	0.006		484	34	453	14	530	190		8.2	0.019	0.8	2.39	0.54	14.6	3.5	49.7	20.2	90	18.7	204	38	41.3	73.4			TT31#34	0	13.3987	0.2	1.71306	15.6209	9.31034	71.0462	93.5829	195.669	356.89	543.807	733.333	1200	1496.06		0.279474	453
TT31#35	0.411	0.033	0.0564	0.0016	0.0519	0.0042		345	24	354	10	230	170		18.9		0.1	1.47	0.25	6.7	3.25	43.5	18.2	89	19.3	212	44.7	74.8	155.6			TT31#35	0	30.8824	0	0.214133	9.60784	4.31034	32.6034	86.8984	171.26	321.555	537.764	756.863	1247.06	1759.84		0.243538	354
TT31#36	0.201	0.02	0.0279	0.0011	0.0525	0.0053		184	17	177.4	7	230	210	0.05	24	0.144	4.08	6	2.02	29.3	9.3	104	43.7	196	42.1	373	76.7	162	152.4			TT31#36	0.21097	39.2157	1.51579	8.73662	39.2157	34.8276	142.579	248.663	409.449	772.085	1184.29	1650.98	2194.12	3019.69		0.465764	177.4
TT31#37	0.254	0.039	0.0392	0.0019	0.0484	0.0078		222	31	247	12	-50	280		13.8	0.045	0.98	1.34	0.56	10	3.59	42.9	17	71.8	17.6	165	30.1	46.7	53.3			TT31#37	0	22.549	0.473684	2.0985	8.75817	9.65517	48.6618	95.9893	168.898	300.353	433.837	690.196	970.588	1185.04		0.467691	247
TT31#38	0.302	0.021	0.0417	0.00092	0.0514	0.0032		266	16	263.3	5.7	260	130		15.9	0.25	6.2	9.8	2.72	51.8	13.7	185	72.7	292	61.8	578	107.1	191	247			TT31#38	0	25.9804	2.63158	13.2762	64.0523	46.8966	252.068	366.31	728.346	1284.45	1764.35	2423.53	3400	4216.54		0.369075	263.3
TT31#39	0.196	0.026	0.0277	0.001	0.0522	0.0074		178	22	176.1	6.5	140	260		35.2	0.37	7.2	10.8	4.35	49.6	13.4	171	52.9	211	51.7	468	85.1	161	122.5			TT31#39	0	57.5163	3.89474	15.4176	70.5882	75	241.363	358.289	673.228	934.629	1274.92	2027.45	2752.94	3350.39		0.574593	176.1
TT31#40	0.224	0.03	0.03112	0.00099	0.0523	0.0067		201	24	197.5	6.2	230	260		49.9	0.44	8.6	9.5	3.23	64	16.8	184	70	264	59.6	547	103	271	172			TT31#40	0	81.5359	4.63158	18.4154	62.0915	55.6897	311.436	449.198	724.409	1236.75	1595.17	2337.25	3217.65	4055.12		0.400474	197.5
TT31#41	0.63	0.03	0.0776	0.0019	0.0586	0.0025		495	18	482	11	531	96		8.8	0.033	0.92	3.6	0.19	25.7	8.9	106	42.5	188	42	402	74	192	489			TT31#41	0	14.3791	0.347368	1.97002	23.5294	3.27586	125.061	237.968	417.323	750.883	1135.95	1647.06	2364.71	2913.39		0.0603892	482
TT31#42	0.628	0.016	0.0784	0.0013	0.0581	0.0015		497	11	486.6	7.8	518	57	0.51	23.8	0.97	8.6	11.2	1.56	40	12	143	54.3	253	59.9	559	113	582	1163			TT31#42	2.1519	38.8889	10.2105	18.4154	73.2026	26.8966	194.647	320.856	562.992	959.364	1528.7	2349.02	3288.24	4448.82		0.225325	486.6
TT31#43	0.613	0.04	0.0748	0.002	0.0596	0.0044		480	24	465	12	520	150		10.2		0.15	1.23	0.22	7.6	2.59	39.7	16.6	87	25.4	266	55.5	88.9	210			TT31#43	0	16.6667	0	0.321199	8.03922	3.7931	36.983	69.2513	156.299	293.286	525.68	996.078	1564.71	2185.04		0.219982	465
TT31#44	0.264	0.018	0.036	0.0011	0.0533	0.004		236	14	228.1	6.9	270	150	1.52	25.7	0.77	8.1	11.1	0.34	61.6	21.1	236	92.9	381	74.5	702	124	258	495			TT31#44	6.4135	41.9935	8.10526	17.3448	72.549	5.86207	299.757	564.171	929.134	1641.34	2302.11	2921.57	4129.41	4881.89		0.0397512	228.1
TT31#45	0.704	0.043	0.0766	0.0019	0.066	0.0034		542	26	475	11	780	110	0.035	18	0.195	2.77	8.1	0.3	42.8	15.1	174	65.9	272	53.8	452	77.3	291	501			TT31#45	0.147679	29.4118	2.05263	5.93148	52.9412	5.17241	208.273	403.743	685.039	1164.31	1643.5	2109.8	2658.82	3043.31		0.0492584	475
TT31#46	0.2261	0.0099	0.03136	0.00069	0.0522	0.0028		206.4	8.2	199	4.3	250	110		23.3	0.046	1.68	2.92		23.8	8	116	51.7	229	49.1	526	92.9	282	591			TT31#46	0	38.0719	0.484211	3.59743	19.085	0	115.815	213.904	456.693	913.428	1383.69	1925.49	3094.12	3657.48		0	199
TT31#47	0.221	0.022	0.02962	0.00091	0.0541	0.0053		200	18	188.2	5.7	260	200		27.5	0.235	4.7	7.5	2.74	39.1	12.1	126	46.6	204	48.6	459	90	213	230			TT31#47	0	44.9346	2.47368	10.0642	49.0196	47.2414	190.268	323.529	496.063	823.322	1232.63	1905.88	2700	3543.31		0.489165	188.2
TT31#48	0.277	0.03	0.0361	0.0013	0.0555	0.0059		244	24	228.8	8.1	290	210		3.9		0.53	0.69		7.1	2.49	26.3	14	57.8	12.8	159	30.8	32.8	117.3			TT31#48	0	6.37255	0	1.1349	4.5098	0	34.5499	66.5775	103.543	247.35	349.245	501.961	935.294	1212.6		0	228.8
TT31#49	0.446	0.031	0.0569	0.0017	0.0569	0.0043		371	22	357	10	400	160	0.25	27.4	0.23	4.2	4.9	1.63	25.5	9	116	48.3	216	48.4	479	98.7	102	188			TT31#49	1.05485	44.7712	2.42105	8.99358	32.0261	28.1034	124.088	240.642	456.693	853.357	1305.14	1898.04	2817.65	3885.83		0.445803	357
TT31#50	0.321	0.013	0.03937	0.00085	0.0587	0.0027		282	10	248.9	5.3	540	100	0.16	9.8	0.172	1.47	1.98	0.53	10.3	4.35	49.1	21.2	97	23.7	228	49	180	447			TT31#50	0.675105	16.0131	1.81053	3.14775	12.9412	9.13793	50.1217	116.31	193.307	374.558	586.103	929.412	1341.18	1929.13		0.358797	248.9
TT31#51	0.593	0.026	0.0744	0.0016	0.0577	0.0028		471	17	462.4	9.8	470	100		9.6	0.034	1.33	2.6		20.1	6.3	91	32.3	148	27.4	285	47.1	91.5	243			TT31#51	0	15.6863	0.357895	2.84797	16.9935	0	97.8102	168.449	358.268	570.671	894.26	1074.51	1676.47	1854.33		0	462.4
TT31#52	0.285	0.018	0.03808	0.00081	0.0547	0.0039		253	15	240.9	5	320	150	0.115	14.4	0.29	4.9	4.5	1.58	22	6.7	70	28.8	140	33.2	354	72.5	244	270			TT31#52	0.485232	23.5294	3.05263	10.4925	29.4118	27.2414	107.056	179.144	275.591	508.834	845.921	1301.96	2082.35	2854.33		0.485471	240.9
TT31#53	0.297	0.016	0.04043	0.00092	0.0535	0.003		263	12	255.4	5.7	340	130	11.8	43	4.6	21.1	6.6	0.45	18.2	4.74	73	27.6	141	31.5	324	62.9	117	349			TT31#53	49.789	70.2614	48.4211	45.182	43.1373	7.75862	88.5645	126.738	287.402	487.633	851.964	1235.29	1905.88	2476.38		0.125524	255.4
TT31#54	0.294	0.012	0.04008	0.00083	0.0527	0.0022		261.2	9.8	253.3	5.1	286	89	0.41	7.7	0.125	1.28	5.6	0.52	40.3	17.5	228	83.8	358	76.5	805	153	151	657			TT31#54	1.72996	12.5817	1.31579	2.7409	36.6013	8.96552	196.107	467.914	897.638	1480.57	2163.14	3000	4735.29	6023.62		0.105823	253.3
TT31#55	0.289	0.011	0.03954	0.00076	0.0527	0.002		256.8	8.3	250	4.7	291	85		20.9	0.26	6	7.7	1.62	50.7	16.6	191	78.2	325	71.9	742	124	1040	904			TT31#55	0	34.1503	2.73684	12.848	50.3268	27.931	246.715	443.85	751.969	1381.63	1963.75	2819.61	4364.71	4881.89		0.250662	250
TT31#56	0.278	0.014	0.03809	0.00083	0.0526	0.0027		248	11	240.9	5.2	270	110		38.4	0.023	0.92	0.95	0.46	7.9	3.45	43.1	17	110	32.8	455	106	490	676			TT31#56	0	62.7451	0.242105	1.97002	6.20915	7.93103	38.4428	92.246	169.685	300.353	664.653	1286.27	2676.47	4173.23		0.513341	240.9
TT31#57	0.361	0.024	0.0479	0.0015	0.0542	0.0037		311	18	303.3	8.6	340	150	0.085	25.2		1.61	1.79	0.71	6.6	3.38	39.1	17.8	85	23.2	229	42.7	281	249			TT31#57	0.35865	41.1765	0	3.44754	11.6993	12.2414	32.1168	90.3743	153.937	314.488	513.595	909.804	1347.06	1681.1		0.631515	303.3
TT31#58	0.203	0.013	0.02897	0.00056	0.0504	0.0032		186	11	184.1	3.5	170	130		26.4	0.211	2.09	4.7	0.72	23	8.6	108	45.7	212	57.4	595	114	210	411			TT31#58	0	43.1373	2.22105	4.47537	30.719	12.4138	111.922	229.947	425.197	807.42	1280.97	2250.98	3500	4488.19		0.211711	184.1
TT31#59	0.362	0.018	0.0504	0.0016	0.0514	0.0018		312	13	317	10	249	81		27.2	0.136	1.81	6.6	0.79	34.8	13.1	158	61.8	277	65.5	610	116	459	920			TT31#59	0	44.4444	1.43158	3.8758	43.1373	13.6207	169.343	350.267	622.047	1091.87	1673.72	2568.63	3588.24	4566.93		0.159364	317
TT31#60	0.502	0.023	0.0645	0.0012	0.056	0.0024		411	16	402.9	7.4	415	96	0.2	38.5	0.19	1.73	3.15	0.97	20.6	5.7	69.7	31.8	153	39.9	408	80	244	364			TT31#60	0.843882	62.9085	2	3.7045	20.5882	16.7241	100.243	152.406	274.409	561.837	924.471	1564.71	2400	3149.61		0.368134	402.9
TT31#61	0.626	0.019	0.078	0.0013	0.0578	0.0018		493	12	484.2	7.6	497	67		10.8	0.37	3.9	3.4	0.97	8.9	1.99	26.9	9.5	43.6	14.5	145	31.4	176	751			TT31#61	0	17.6471	3.89474	8.35118	22.2222	16.7241	43.309	53.2086	105.906	167.845	263.444	568.627	852.941	1236.22		0.53909	484.2
TT31#62	0.268	0.016	0.03888	0.0009	0.0496	0.003		242	14	245.9	5.6	160	130		14.7	0.021	1.01	2.37	0.37	21.8	6.9	89	36.6	196	37.2	433	74.2	174	311			TT31#62	0	24.0196	0.221053	2.16274	15.4902	6.37931	106.083	184.492	350.394	646.643	1184.29	1458.82	2547.06	2921.26		0.15737	245.9
TT31#63	0.217	0.019	0.0315	0.0012	0.0492	0.0044		197	16	200	7.2	120	180		16.5	0.095	2.23	4	0.86	25	8.1	90	37.8	169	32.9	318	67.4	145	197			TT31#63	0	26.9608	1	4.77516	26.1438	14.8276	121.655	216.578	354.331	667.845	1021.15	1290.2	1870.59	2653.54		0.262919	200
TT31#64	1.181	0.043	0.1326	0.0038	0.0643	0.002		789	20	802	21	727	70		0.22	0.029	1.08	2.69		25.8	11.9	144	46.9	179	36.8	299	50	49.9	306			TT31#64	0	0.359477	0.305263	2.31263	17.5817	0	125.547	318.182	566.929	828.622	1081.57	1443.14	1758.82	1968.5		0	802
TT31#65	0.593	0.021	0.0714	0.0015	0.0595	0.0018		471	13	444.5	8.8	563	67		0.86			1.03		10.4	4.17	48.9	15.8	67.7	16.4	160	27.1	32.6	769			TT31#65	0	1.40523	0	0	6.73203	0	50.6083	111.497	192.52	279.152	409.063	643.137	941.176	1066.93		0	444.5
TT31#66	0.212	0.02	0.0295	0.00088	0.0514	0.0051		193	16	187.4	5.5	180	190		6.2	0.014	0.37	2.15	0.069	18	5.8	63.9	25.9	126	23.3	252	41.9	128	312			TT31#66	0	10.1307	0.147368	0.792291	14.0523	1.18966	87.5912	155.08	251.575	457.597	761.329	913.725	1482.35	1649.61		0.0339092	187.4
TT31#67	0.224	0.024	0.0306	0.0011	0.0536	0.0063		203	20	194.2	6.8	240	240		13.7	0.098	0.73	3.6	0.21	15.5	6.69	99	43.9	214	51.3	527	108.4	115	159			TT31#67	0	22.3856	1.03158	1.56317	23.5294	3.62069	75.4258	178.877	389.764	775.618	1293.05	2011.76	3100	4267.72		0.085946	194.2
TT31#68	0.612	0.041	0.0753	0.0023	0.0592	0.0043		479	26	468	14	480	160		5.6	0.021	1.73	4.1	0.3	25.2	6.3	80	30	119	24.6	238	43.4	69.9	101			TT31#68	0	9.15033	0.221053	3.7045	26.7974	5.17241	122.628	168.449	314.961	530.035	719.033	964.706	1400	1708.66		0.0902304	468
TT31#69	0.317	0.017	0.0399	0.0013	0.0574	0.0026		279	13	252.4	8.3	480	100	0.74	12.6	0.47	1.1	2.43	0.22	12.4	4.42	60.3	30.8	140	36.9	356	72.4	174	587			TT31#69	3.12236	20.5882	4.94737	2.35546	15.8824	3.7931	60.3406	118.182	237.402	544.17	845.921	1447.06	2094.12	2850.39		0.122527	252.4
TT31#70	0.21	0.019	0.03088	0.00079	0.0512	0.0051		195	17	196	5	150	190	0.102	7.3		0.47	2.13	0.28	14.8	4.42	61	27.2	134	29.4	293	56.8	93	215			TT31#70	0.43038	11.9281	0	1.00642	13.9216	4.82759	72.0195	118.182	240.157	480.565	809.668	1152.94	1723.53	2236.22		0.152462	196
TT31#71	0.285	0.022	0.0388	0.0012	0.0537	0.0045		252	17	245.2	7.5	280	170		3.7		0.58	1.77	0.22	8.6	4.59	56.1	21.2	95.3	23.9	211	43.2	50.3	161.5			TT31#71	0	6.04575	0	1.24197	11.5686	3.7931	41.8491	122.727	220.866	374.558	575.831	937.255	1241.18	1700.79		0.172389	245.2
TT31#72	0.61	0.038	0.0752	0.0021	0.0588	0.004		479	24	467	13	480	140		5.8	0.054	1.54	1.53	0.23	19.4	5.83	63.8	24	105	18.4	217	33.3	54	138.2			TT31#72	0	9.47712	0.568421	3.29764	10	3.96552	94.4039	155.882	251.181	424.028	634.441	721.569	1276.47	1311.02		0.129064	467
TT31#73	0.307	0.017	0.04142	0.00098	0.0536	0.003		270	13	261.6	6	300	120		16.2	0.02	0.48	2.65	0.2	11.1	4.52	50.5	22.4	106	25.1	225	43.4	166	404			TT31#73	0	26.4706	0.210526	1.02784	17.3203	3.44828	54.0146	120.856	198.819	395.76	640.483	984.314	1323.53	1708.66		0.112738	261.6
TT31#74	0.233	0.013	0.03249	0.00082	0.0522	0.0029		213	11	206.1	5.1	250	120		43.6	0.027	1.02	3.6	0.7	23.8	11.3	170	69.5	344	80.7	891	162	253	367			TT31#74	0	71.2418	0.284211	2.18415	23.5294	12.069	115.815	302.139	669.291	1227.92	2078.55	3164.71	5241.18	6377.95		0.231197	206.1
TT31#75	0.38	0.018	0.0369	0.001	0.075	0.004		326	13	233.6	6.5	1010	110	6.68	67.4	4.6	22.5	21.2	4.36	61.9	23.2	253	98	435	105.4	1012	198	611	845			TT31#75	28.1857	110.131	48.4211	48.1799	138.562	75.1724	301.217	620.321	996.063	1731.45	2628.4	4133.33	5952.94	7795.28		0.367957	233.6
TT31#76	0.711	0.034	0.0871	0.0023	0.0592	0.0031		542	20	538	14	520	110		6.2	0.008	0.53	0.78	0.012	4.2	2.11	23.1	8.5	38.5	9.9	96	20.8	114	271			TT31#76	0	10.1307	0.0842105	1.1349	5.09804	0.206897	20.438	56.4171	90.9449	150.177	232.628	388.235	564.706	818.898		0.020269	538
TT31#77	0.208	0.022	0.031	0.0012	0.0492	0.0054		189	19	196.9	7.7	70	210	0.015	9.5	0.36	5.9	10.4	3.45	56	13.8	149	55.1	223	46.9	390	72.9	117	138.6			TT31#77	0.0632911	15.5229	3.78947	12.6338	67.9739	59.4828	272.506	368.984	586.614	973.498	1347.43	1839.22	2294.12	2870.08		0.437051	196.9
TT31#78	0.596	0.053	0.0784	0.0028	0.0544	0.0046		465	35	486	17	330	190		4.7	0.234	5.6	9.7	0.95	52	16.2	168	65	256	50.4	428	73.6	70.1	120			TT31#78	0	7.67974	2.46316	11.9914	63.3987	16.3793	253.041	433.155	661.417	1148.41	1546.83	1976.47	2517.65	2897.64		0.129318	486
TT31#79	0.293	0.0092	0.0339	0.00074	0.0624	0.0021		261.9	7.6	214.9	4.6	673	77	3.49	22.4	2.19	11.5	7.8	1.87	26.5	8.5	118	46.9	287	78.9	885	169	459	1290			TT31#79	14.7257	36.6013	23.0526	24.6253	50.9804	32.2414	128.954	227.273	464.567	828.622	1734.14	3094.12	5205.88	6653.54		0.397645	214.9
TT31#80	1.925	0.045	0.1736	0.0039	0.08	0.0011		1088	16	1032	21	1191	27	0.28	24.3	0.135	2.58	2.52	0.36	18	7.4	92	42.2	203	48.7	541	110	308	1540			TT31#80	1.18143	39.7059	1.42105	5.52463	16.4706	6.2069	87.5912	197.861	362.205	745.583	1226.59	1909.8	3182.35	4330.71		0.163414	1032
TT31#81	0.329	0.013	0.042	0.0018	0.0572	0.0023		288	10	265	11	466	88	2.32	69.6	2.18	16.1	18.5	2.73	78	24.9	335	107	495	125	1170	223	698	953			TT31#81	9.78903	113.725	22.9474	34.4754	120.915	47.069	379.562	665.775	1318.9	1890.46	2990.94	4901.96	6882.35	8779.53		0.219712	265
TT31#82	0.297	0.024	0.0393	0.0012	0.0557	0.0053		262	19	248.6	7.3	320	190	0.73	47.5	0.98	6.1	6.9	2.13	27.5	8.5	124	46.6	225	56.5	612	109	179	246			TT31#82	3.08017	77.6144	10.3158	13.0621	45.098	36.7241	133.82	227.273	488.189	823.322	1359.52	2215.69	3600	4291.34		0.472729	248.6
TT31#83	0.35	0.014	0.04787	0.00096	0.0526	0.002		306	11	301.4	5.9	285	84	0.17	13.8	0.095	1.21	2.72	0.51	17.6	7.4	85	28.8	145	36.8	315	67	400	830			TT31#83	0.7173	22.549	1	2.59101	17.7778	8.7931	85.6448	197.861	334.646	508.834	876.133	1443.14	1852.94	2637.8		0.225348	301.4
TT31#84	0.192	0.018	0.02831	0.00082	0.0496	0.0049		177	15	179.9	5.1	120	190		9.3	0.169	2.36	3.8	1.44	17.4	7.5	85	30.9	156	33.8	347	70.3	150	220			TT31#84	0	15.1961	1.77895	5.05353	24.8366	24.8276	84.6715	200.535	334.646	545.936	942.598	1325.49	2041.18	2767.72		0.541402	179.9
TT31#85	0.582	0.014	0.0726	0.0012	0.0575	0.0012		466.7	8.3	451.6	7.3	507	49	0.19	19.2	0.37	4.05	8.4	0.82	42	16	187	74.8	335	66.5	582	110	602	1370			TT31#85	0.801688	31.3725	3.89474	8.67238	54.902	14.1379	204.38	427.807	736.22	1321.55	2024.17	2607.84	3423.53	4330.71		0.133467	451.6
TT31#86	0.284	0.016	0.0351	0.001	0.0576	0.0027		253	12	222.5	6.5	530	110	0.018	10	0.017	0.98	0.91	0.21	12	4.57	54.8	24.6	120	27.4	325	64.9	130	468			TT31#86	0.0759494	16.3399	0.178947	2.0985	5.94771	3.62069	58.3942	122.193	215.748	434.629	725.076	1074.51	1911.76	2555.12		0.194282	222.5
TT31#87	0.314	0.035	0.0424	0.0016	0.054	0.0061		271	27	267	10	220	220		15		1.8	2.7	1.23	14.2	7	67	26.7	117	27.9	272	61.8	53.2	75.9			TT31#87	0	24.5098	0	3.85439	17.6471	21.2069	69.0998	187.166	263.78	471.731	706.949	1094.12	1600	2433.07		0.607299	267
TT31#88	3.287	0.097	0.256	0.0071	0.0921	0.002		1474	23	1468	36	1475	36	0.02	208	0.67	12.9	26.6	6.63	155	50.3	619	228	924	209	1950	328	773	512			TT31#88	0.0843882	339.869	7.05263	27.6231	173.856	114.31	754.258	1344.92	2437.01	4028.27	5583.08	8196.08	11470.6	12913.4		0.315668	1468
TT31#89	0.344	0.055	0.0429	0.0017	0.0575	0.0089		288	40	271	11	300	310		1.21			0.37	0.091	0.35	0.2	2.4	3.36	15.8	3.77	50.6	13.4	13.5	48.1			TT31#89	0	1.97712	0	0	2.4183	1.56897	1.70316	5.34759	9.44882	59.364	95.4683	147.843	297.647	527.559		0.77309	271
TT31#90	1.116	0.051	0.1008	0.0032	0.0792	0.0027		756	24	619	18	1152	65		6.5		0.2	0.93	0.101	5.8	1.71	18.6	9.5	43.5	12.5	114	24.2	29.8	209			TT31#90	0	10.6209	0	0.428266	6.07843	1.74138	28.2238	45.7219	73.2283	167.845	262.84	490.196	670.588	952.756		0.13295	619
TT31#91	0.307	0.024	0.0419	0.0012	0.0528	0.0039		269	18	264.3	7.3	250	150		15.1	0.019	0.57	2.58	0.25	15.4	5.18	74	29.2	136	31.3	300	63.2	109	182			TT31#91	0	24.6732	0.2	1.22056	16.8627	4.31034	74.9392	138.503	291.339	515.901	821.752	1227.45	1764.71	2488.19		0.121253	264.3
TT31#92	0.689	0.032	0.0843	0.0025	0.0588	0.0022		529	19	521	15	528	78		0.37		0.06	0.86		4.7	3.09	35.8	12	56	10.5	89	17.9	16.6	591			TT31#92	0	0.604575	0	0.12848	5.62092	0	22.871	82.6203	140.945	212.014	338.369	411.765	523.529	704.724		0	521
TT31#93	0.194	0.01	0.02907	0.00057	0.0486	0.0029		179.2	8.8	184.7	3.6	110	130		5.8		0.69	2.07		21.8	7.1	91	38	169	37.8	356	66.4	219	582			TT31#93	0	9.47712	0	1.47752	13.5294	0	106.083	189.84	358.268	671.378	1021.15	1482.35	2094.12	2614.17		0	184.7
TT31#94	0.557	0.046	0.0676	0.0016	0.0589	0.005		443	30	421.5	9.8	480	190	0.08	4.5	0.19	2.8	4.2	1.13	27.5	7.7	83	34.3	148	28.9	280	47.2	54.6	146			TT31#94	0.337553	7.35294	2	5.99572	27.451	19.4828	133.82	205.882	326.772	606.007	894.26	1133.33	1647.06	1858.27		0.321448	421.5
TT31#95	0.202	0.02	0.0307	0.0013	0.0479	0.0042		184	16	194.6	8.3	70	180		2.6		0.046	0.38	0.38	4.7	1.85	38.9	19.3	107	27.9	341	66.3	43.1	246			TT31#95	0	4.24837	0	0.0985011	2.48366	6.55172	22.871	49.4652	153.15	340.989	646.526	1094.12	2005.88	2610.24		0.869294	194.6
TT31#96	0.304	0.019	0.04214	0.00089	0.0525	0.0033		268	14	266.1	5.5	250	130		14.9		0.56	1.69	0.22	12.8	4.99	73	37.7	181	45.3	507	99.8	117	294			TT31#96	0	24.3464	0	1.19914	11.0458	3.7931	62.2871	133.422	287.402	666.078	1093.66	1776.47	2982.35	3929.13		0.14461	266.1
TT31#97	0.1947	0.0084	0.02801	0.00061	0.0502	0.0021		180.2	7.1	178	3.8	183	91		5.8	0.031	0.59	2.5	0.17	16.4	6.37	95	33.2	144	32.6	354	64.2	164	709			TT31#97	0	9.47712	0.326316	1.26338	16.3399	2.93103	79.8054	170.321	374.016	586.572	870.091	1278.43	2082.35	2527.56		0.0811672	178
TT31#98	0.549	0.028	0.0516	0.0018	0.0769	0.0036		442	19	324	11	1071	94	6.25	40.7	5.56	25.3	21.1	4.97	63	20.5	226	80.6	414	107	1043	203	248	1118			TT31#98	26.3713	66.5033	58.5263	54.1756	137.908	85.6897	306.569	548.128	889.764	1424.03	2501.51	4196.08	6135.29	7992.13		0.416743	324
TT31#99	0.299	0.018	0.0423	0.001	0.052	0.0033		264	14	267	6.3	230	130		7.8	0.01		0.77	0.34	10.6	3.73	48.7	26.3	116	25.7	252	55.8	142	405			TT31#99	0	12.7451	0.105263	0	5.03268	5.86207	51.5815	99.7326	191.732	464.664	700.906	1007.84	1482.35	2196.85		0.363835	267
TT31#100	0.284	0.012	0.03904	0.00083	0.0524	0.0021		252.7	9.5	246.9	5.2	272	87		14.9	0.079	2.33	3.9	1.04	17.2	7	70	26	138	36.5	396	81	580	940			TT31#100	0	24.3464	0.831579	4.98929	25.4902	17.931	83.6983	187.166	275.591	459.364	833.837	1431.37	2329.41	3188.98		0.388204	246.9
TT31#101	0.1975	0.0068	0.02821	0.00052	0.0506	0.0018		182.7	5.7	179.3	3.3	203	76	2.59	13	1	5.4	3.48	0.14	30.1	9.4	118	43.9	175	37.7	347	65.4	341	1483			TT31#101	10.9283	21.2418	10.5263	11.5632	22.7451	2.41379	146.472	251.337	464.567	775.618	1057.4	1478.43	2041.18	2574.8		0.0418195	179.3
TT31#102	0.371	0.032	0.048	0.0016	0.0564	0.0048		320	25	301.9	9.7	360	180		7.1		0.9	2.65	0.62	11.5	4.69	51.6	22.9	94	21	223	42.9	49.9	141			TT31#102	0	11.6013	0	1.92719	17.3203	10.6897	55.9611	125.401	203.15	404.594	567.976	823.529	1311.76	1688.98		0.343355	301.9
TT31#103	0.393	0.019	0.0491	0.0022	0.059	0.0027		335	13	309	13	520	100	22.9	95	17.3	85	29.6	1.33	48.3	9.1	115	42.3	219	58.6	679	122	84	790			TT31#103	96.6245	155.229	182.105	182.013	193.464	22.931	235.036	243.316	452.756	747.35	1323.26	2298.04	3994.12	4803.15		0.107536	309
TT31#104	0.639	0.022	0.0802	0.0017	0.0579	0.0022		500	13	497	10	494	79		8.8	0.118	2.08	3.69	0.105	27.6	8.3	92	31.6	136	26.2	244	46	159	436			TT31#104	0	14.3791	1.24211	4.45396	24.1176	1.81034	134.307	221.925	362.205	558.304	821.752	1027.45	1435.29	1811.02		0.0318086	497
TT31#105	0.282	0.0093	0.03881	0.0007	0.0524	0.0018		251.9	7.4	245.4	4.3	280	77		6.2	0.011			0.144	2.4	1.41	21.5	11.2	80	24	296	81.5	173	1086			TT31#105	0	10.1307	0.115789	0	0	2.48276	11.6788	37.7005	84.6457	197.88	483.384	941.176	1741.18	3208.66		#DIV/0!	245.4
TT31#106	0.75	0.13	0.0318	0.0018	0.163	0.025		534	70	202	11	2190	290	3.7	28	1.76	8.1	6.1	1.01	23.6	5.4	58	22.4	91	20.9	175	35.9	48.7	51.9			TT31#106	15.6118	45.7516	18.5263	17.3448	39.8693	17.4138	114.842	144.385	228.346	395.76	549.849	819.608	1029.41	1413.39		0.25735	202
TT31#107	0.1966	0.0084	0.02878	0.00054	0.0493	0.0022		181.8	7.2	182.9	3.4	160	100		8.2	0.008	0.97	4.1	0.22	22.9	8.2	118	45	205	51.6	408	84.1	253	831			TT31#107	0	13.3987	0.0842105	2.07709	26.7974	3.7931	111.436	219.251	464.567	795.053	1238.67	2023.53	2400	3311.02		0.0694123	182.9
TT31#108	0.216	0.015	0.03063	0.00076	0.0508	0.0035		197	13	194.5	4.8	180	140		11.9	0.008	0.41	1.08	0.034	10.9	3.92	60	26.3	127	33	336	67.5	114	406			TT31#108	0	19.4444	0.0842105	0.877944	7.05882	0.586207	53.0414	104.813	236.22	464.664	767.372	1294.12	1976.47	2657.48		0.0302955	194.5
TT31#109	3.097	0.063	0.2428	0.0044	0.0917	0.0016		1430	16	1400	23	1455	32	0.046	15.5	0.62	9.4	18.7	0.42	78	25.2	315	102	433	83.5	724	130	377	489			TT31#109	0.194093	25.3268	6.52632	20.1285	122.222	7.24138	379.562	673.797	1240.16	1802.12	2616.31	3274.51	4258.82	5118.11		0.0336206	1400
TT31#110	0.35	0.018	0.04714	0.00095	0.0538	0.0027		303	13	296.9	5.8	340	110	0.068	11.4	0.35	4.3	9	1.56	46.6	15.4	189	69.9	317	69.9	659	120	250	407			TT31#110	0.28692	18.6275	3.68421	9.20771	58.8235	26.8966	226.764	411.765	744.094	1234.98	1915.41	2741.18	3876.47	4724.41		0.232881	296.9
TT31#111	0.61	0.025	0.0765	0.0016	0.0571	0.0026		482	16	474.8	9.7	470	100	0.48	4.5	0.64	4.7	7.8	0.85	37.3	12.8	130	48.6	184	43.2	377	73.8	131	357			TT31#111	2.02532	7.35294	6.73684	10.0642	50.9804	14.6552	181.509	342.246	511.811	858.657	1111.78	1694.12	2217.65	2905.51		0.152349	474.8
TT31#112	0.214	0.015	0.02975	0.00081	0.0519	0.0039		195	12	188.9	5.1	240	160		31.4	0.031	1.77	4.4	0.78	30	13.4	188	74	360	86	817	186	348	523			TT31#112	0	51.3072	0.326316	3.79015	28.7582	13.4483	145.985	358.289	740.157	1307.42	2175.23	3372.55	4805.88	7322.83		0.207554	188.9
TT31#113	0.47	0.04	0.0625	0.0044	0.055	0.0032		385	28	390	27	350	120		6		0.92	2.21	0.099	17.2	5.43	75	27.6	145	32.6	312	57.6	81.3	294			TT31#113	0	9.80392	0	1.97002	14.4444	1.7069	83.6983	145.187	295.276	487.633	876.133	1278.43	1835.29	2267.72		0.0490906	390
TT31#114	0.32	0.029	0.0431	0.0014	0.0526	0.0043		279	22	271.9	8.7	270	180		14	0.038	1.42	3.1	0.61	19.1	5.6	71	25.3	117	27.4	305	50.7	103	142			TT31#114	0	22.8758	0.4	3.04069	20.2614	10.5172	92.944	149.733	279.528	446.996	706.949	1074.51	1794.12	1996.06		0.242357	271.9
TT31#115	0.31	0.021	0.0417	0.0016	0.0538	0.0035		272	16	263	10	300	130		17.8	0.1	1.07	3.26	0.85	13.2	5.35	68	29.9	165	42.9	472	113	208	583			TT31#115	0	29.085	1.05263	2.29122	21.3072	14.6552	64.2336	143.048	267.717	528.269	996.979	1682.35	2776.47	4448.82		0.396138	263
TT31#116	0.31	0.016	0.04173	0.00096	0.053	0.0027		273	12	263.5	6	310	110		2.81		0.79	2.55	0.045	13.2	7.3	108	39.4	185	44.5	422	87.5	118	443			TT31#116	0	4.5915	0	1.69165	16.6667	0.775862	64.2336	195.187	425.197	696.113	1117.82	1745.1	2482.35	3444.88		0.0237126	263.5
TT31#117	0.212	0.012	0.02965	0.00059	0.051	0.0028		194.1	9.8	188.4	3.7	220	120		5.6	0.036	0.18	1.79	0.084	8.6	4.01	47.8	19.4	107	22.3	270	56.7	108	591			TT31#117	0	9.15033	0.378947	0.385439	11.6993	1.44828	41.8491	107.219	188.189	342.756	646.526	874.51	1588.24	2232.28		0.0654526	188.4
TT31#118	0.27	0.018	0.03916	0.00097	0.0495	0.0031		241	14	247.6	6	140	130		9.2	0.076	2.05	6.2	0.85	24.2	7.8	82	32.2	158	29.1	264	49.5	163	307			TT31#118	0	15.0327	0.8	4.38972	40.5229	14.6552	117.762	208.556	322.835	568.905	954.683	1141.18	1552.94	1948.82		0.212148	247.6
TT31#119	0.567	0.018	0.0722	0.0023	0.0565	0.0013		455	12	449	14	479	50	0.069	15.2	0.4	2.49	4.1	0.43	25.8	9.6	109	44.3	242	52.6	573	102.4	491	1340			TT31#119	0.291139	24.8366	4.21053	5.33191	26.7974	7.41379	125.547	256.684	429.134	782.686	1462.24	2062.75	3370.59	4031.5		0.127817	449
TT31#120	0.698	0.048	0.0861	0.0027	0.0605	0.0045		533	29	532	16	550	150	13	49	4.6	22	3	0.66	4.7	2.26	19.8	8.4	44.4	12	158	36.8	113	203			TT31#120	54.8523	80.0654	48.4211	47.1092	19.6078	11.3793	22.871	60.4278	77.9528	148.41	268.278	470.588	929.412	1448.82		0.537351	532
TT31#121	0.286	0.017	0.039	0.0013	0.0533	0.0033		255	13	246.9	7.8	290	130		17.4		0.11	0.4	0.27	8.4	2.94	40.5	21.4	141	42.8	450	110	165	442			TT31#121	0	28.4314	0	0.235546	2.61438	4.65517	40.8759	78.6096	159.449	378.092	851.964	1678.43	2647.06	4330.71		0.450316	246.9
TT31#122	0.251	0.028	0.0362	0.0015	0.0513	0.0057		223	22	229.4	9.1	140	220		6.2	0.119	1.98	2.84	0.79	18.2	5.87	83	32.4	162	35.5	330	69.4	105	221			TT31#122	0	10.1307	1.25263	4.23983	18.5621	13.6207	88.5645	156.952	326.772	572.438	978.852	1392.16	1941.18	2732.28		0.335935	229.4
TT31#123	0.218	0.022	0.029	0.0014	0.0552	0.0058		199	18	184.4	8.7	290	210	0.072	10.2	0.22	1.38	3.1	1.23	11.7	5.4	66	28.2	131	35.9	398	76.7	64.6	222			TT31#123	0.303797	16.6667	2.31579	2.95503	20.2614	21.2069	56.9343	144.385	259.843	498.233	791.541	1407.84	2341.18	3019.69		0.624389	184.4
TT31#124	0.242	0.011	0.03179	0.00065	0.055	0.0024		219.6	8.6	201.7	4.1	378	93	1.1	9.9	0.97	7.5	5.2	0.55	19.2	5.7	90	49.7	276	78.4	960	184	221	926			TT31#124	4.64135	16.1765	10.2105	16.06	33.9869	9.48276	93.4307	152.406	354.331	878.092	1667.67	3074.51	5647.06	7244.09		0.168281	201.7
TT31#125	0.365	0.056	0.049	0.002	0.0543	0.0087		309	44	308	12	180	300		3.3	0.011	0.12	0.46	0.22	4.8	1.08	15	6.6	33.6	7.8	107	23.4	20	45.2			TT31#125	0	5.39216	0.115789	0.256959	3.00654	3.7931	23.3577	28.877	59.0551	116.608	203.021	305.882	629.412	921.26		0.452634	308
TT39#01	0.668	0.02	0.0831	0.0017	0.0578	0.0013		518	12	515	10	510	50		1.6		0.4	2.8	0.053	18.5	9.7	88	18.1	51.8	6.1	58	4	16.9	1610			TT39#01	0	2.61438	0	0.856531	18.3007	0.913793	90.0243	259.358	346.457	319.788	312.991	239.216	341.176	157.48		0.0225131	515
TT39#02	0.311	0.012	0.04258	0.00084	0.0528	0.002		274.3	8.9	268.8	5.2	292	82	0.25	15.7	0.48	4.5	11.6	1.32	47.6	18.6	233	96	411	98	839	178	618	1400			TT39#02	1.05485	25.6536	5.05263	9.63597	75.817	22.7586	231.63	497.326	917.323	1696.11	2483.38	3843.14	4935.29	7007.87		0.171737	268.8
TT39#03	0.683	0.021	0.0852	0.0018	0.0583	0.0017		527	12	527	11	519	63				0.58	2.6	0.031	30.7	12.9	153	49.8	225	52.4	466	89	22.4	1240			TT39#03	0	0	0	1.24197	16.9935	0.534483	149.392	344.92	602.362	879.859	1359.52	2054.9	2741.18	3503.94		0.0106079	527
TT39#04	0.223	0.018	0.03158	0.00091	0.0509	0.0042		205	16	200.4	5.7	180	170		25.9		1.13	6.2	0.13	47	17.7	188	84	365	65.8	620	114	240	515			TT39#04	0	42.3203	0	2.4197	40.5229	2.24138	228.71	473.262	740.157	1484.1	2205.44	2580.39	3647.06	4488.19		0.0232821	200.4
TT39#05	0.293	0.022	0.0404	0.0015	0.0529	0.0039		258	17	255.4	9.5	250	160	12.8	30	6.6	27.8	13	2.09	26	9.7	93	38.4	170	39.2	449	79	177	700			TT39#05	54.0084	49.0196	69.4737	59.5289	84.9673	36.0345	126.521	259.358	366.142	678.445	1027.19	1537.25	2641.18	3110.24		0.347545	255.4
TT39#06	0.2	0.021	0.0302	0.001	0.0474	0.0049		183	17	191.5	6.4	40	210		13.9	0.019	1.7	4.9	1.44	19.7	7.5	80	28.2	167	35.5	330	73	217	302			TT39#06	0	22.7124	0.2	3.64026	32.0261	24.8276	95.8637	200.535	314.961	498.233	1009.06	1392.16	1941.18	2874.02		0.448079	191.5
TT39#07	0.725	0.032	0.0886	0.0022	0.0586	0.0024		550	19	547	13	526	92		0.65	0.078	0.17	1.68		23.9	9.2	113	45.8	220	47.8	401	79.5	96	560			TT39#07	0	1.06209	0.821053	0.364026	10.9804	0	116.302	245.989	444.882	809.187	1329.31	1874.51	2358.82	3129.92		0	547
TT39#08	0.199	0.016	0.02889	0.00082	0.0501	0.0042		183	14	183.6	5.1	130	170		37.9	0.16	2.7	7.2	3.09	42	12.3	116	36.9	151	28.1	309	64.1	324	437			TT39#08	0	61.9281	1.68421	5.78158	47.0588	53.2759	204.38	328.877	456.693	651.943	912.387	1101.96	1817.65	2523.62		0.543239	183.6
TT39#09	0.29	0.024	0.0397	0.0021	0.0532	0.0036		256	19	251	13	270	140	10.2	21	7.6	30	24.4	4.7	56	17.1	179	77	368	90	840	153	125	830			TT39#09	43.038	34.3137	80	64.2398	159.477	81.0345	272.506	457.219	704.724	1360.42	2223.56	3529.41	4941.18	6023.62		0.388716	251
TT39#10	0.229	0.015	0.03221	0.00095	0.0516	0.0036		208	13	204.3	5.9	210	140	0.58	42.7	1.12	8.9	17	0.53	90	33.7	390	143	637	116	1010	195	355	687			TT39#10	2.44726	69.7712	11.7895	19.0578	111.111	9.13793	437.956	901.07	1535.43	2526.5	3848.94	4549.02	5941.18	7677.17		0.0414242	204.3
TT39#11	0.309	0.031	0.0417	0.0013	0.0524	0.0048		269	23	263.2	8.3	240	190		13.6	0.029	1.2	4.8		20.4	7	86	28.2	134	24.7	234	51.5	119	354			TT39#11	0	22.2222	0.305263	2.56959	31.3725	0	99.2701	187.166	338.583	498.233	809.668	968.627	1376.47	2027.56		0	263.2
TT39#12	0.322	0.037	0.0445	0.0017	0.0526	0.0055		277	28	281	11	230	210		21.6		1.18	1.77	1.18	16.6	4.9	56	24.9	104	28.2	292	57.4	97	157			TT39#12	0	35.2941	0	2.52677	11.5686	20.3448	80.7786	131.016	220.472	439.929	628.399	1105.88	1717.65	2259.84		0.665526	281
TT39#13	0.303	0.021	0.0431	0.0011	0.051	0.0035		267	16	271.7	6.7	180	140	3.1	17.3	1.02	9.2	3.2	0.34	41	11.2	145	58	307	78	675	161	270	579			TT39#13	13.0802	28.268	10.7368	19.7002	20.915	5.86207	199.513	299.465	570.866	1024.73	1854.98	3058.82	3970.59	6338.58		0.0907477	271.7
TT39#14	0.303	0.017	0.042	0.0012	0.0523	0.0032		267	13	265.4	7.2	250	130		10.3	0.12	1.9	6.3	1.08	55	13.6	217	78	348	66	680	151	270	535			TT39#14	0	16.8301	1.26316	4.06852	41.1765	18.6207	267.64	363.636	854.331	1378.09	2102.72	2588.24	4000	5944.88		0.177376	265.4
TT39#15	0.204	0.016	0.02988	0.00088	0.0496	0.0042		187	13	189.7	5.5	100	170	0.037	75	0.016	1.17	2.5	1.16	27.5	11.8	127	60.6	315	73.8	762	172	256	445			TT39#15	0.156118	122.549	0.168421	2.50535	16.3399	20	133.82	315.508	500	1070.67	1903.32	2894.12	4482.35	6771.65		0.427706	189.7
TT39#16	0.215	0.012	0.02997	0.00072	0.0518	0.003		196.8	9.6	190.3	4.5	230	120	0.33	19.6	0.49	3.5	7.2	0.022	49	20.3	205	94	390	83	730	149	353	900			TT39#16	1.39241	32.0261	5.15789	7.49465	47.0588	0.37931	238.443	542.781	807.087	1660.78	2356.5	3254.9	4294.12	5866.14		0.00358082	190.3
TT39#17	4.87	0.24	0.3087	0.0076	0.1129	0.0049		1785	41	1733	37	1815	79		7	0.21	3.3	8.3	0.069	34.1	9.7	113	43.5	190	35.6	292	47.5	149	128			TT39#17	0	11.4379	2.21053	7.06638	54.2484	1.18966	165.937	259.358	444.882	768.551	1148.04	1396.08	1717.65	1870.08		0.0125388	1733
TT39#18	0.65	0.025	0.0845	0.0016	0.0554	0.0023		510	16	522.9	9.6	409	93		5	0.06	0.24	2.5	0.18	27.2	6.4	83	29.8	149	31.5	282	59.1	177	880			TT39#18	0	8.16993	0.631579	0.513919	16.3399	3.10345	132.36	171.123	326.772	526.502	900.302	1235.29	1658.82	2326.77		0.0667332	522.9
TT39#19	0.285	0.038	0.0424	0.002	0.0503	0.007		253	31	268	13	80	260		7.5		0.82	1.49	0.47	11.5	3.5	71	25.2	140	28.9	246	56.8	52	119			TT39#19	0	12.2549	0	1.75589	9.73856	8.10345	55.9611	93.5829	279.528	445.23	845.921	1133.33	1447.06	2236.22		0.34712	268
TT39#20	0.203	0.017	0.0285	0.00081	0.0519	0.0045		189	15	181.1	5.1	210	170		11.7		0.57	1.45	0.6	8.4	4.2	45.2	20.1	92	21.6	249	54.4	150	387			TT39#20	0	19.1176	0	1.22056	9.47712	10.3448	40.8759	112.299	177.953	355.124	555.891	847.059	1464.71	2141.73		0.525595	181.1
TT39#21	0.576	0.033	0.0745	0.0021	0.0551	0.0026		458	21	463	12	390	110		9.5	0.032	1.41	3.6	0.031	29.6	11.9	173	73.7	305	65.5	571	106	307	890			TT39#21	0	15.5229	0.336842	3.01927	23.5294	0.534483	144.039	318.182	681.102	1302.12	1842.9	2568.63	3358.82	4173.23		0.00918096	463
TT39#22	0.611	0.041	0.0814	0.0025	0.0555	0.0041		484	28	504	15	370	160		2.5	0.107	2.09	6.2		31.7	12.6	131	45.3	193	39.9	349	64.5	121	195			TT39#22	0	4.08497	1.12632	4.47537	40.5229	0	154.258	336.898	515.748	800.353	1166.16	1564.71	2052.94	2539.37		0	504
TT39#23	0.284	0.018	0.0408	0.0013	0.0508	0.0031		252	15	257.6	7.7	190	130		6.7	0.033	0.61	3.2	0.2	31.7	11	158	59.3	308	70.2	615	124	304	664			TT39#23	0	10.9477	0.347368	1.30621	20.915	3.44828	154.258	294.118	622.047	1047.7	1861.03	2752.94	3617.65	4881.89		0.0607084	257.6
TT39#24	0.328	0.027	0.0433	0.0014	0.0542	0.004		284	20	273.3	8.8	300	160	0.14	38.8	0.19	1.14	3.5	1.78	13.7	4.2	63	29.7	132	26.6	344	82.8	506	507			TT39#24	0.590717	63.3987	2	2.44111	22.8758	30.6897	66.6667	112.299	248.031	524.735	797.583	1043.14	2023.53	3259.84		0.785868	273.3
TT39#25	0.285	0.019	0.0421	0.0012	0.0495	0.0032		256	16	265.8	7.6	130	140		10.2	0.046	2.3	6.3	1.29	50.3	22.4	271	104.4	457	89.4	806	132.8	237	461			TT39#25	0	16.6667	0.484211	4.92505	41.1765	22.2414	244.769	598.93	1066.93	1844.52	2761.33	3505.88	4741.18	5228.35		0.221544	265.8
TT39#26	3.43	0.11	0.2542	0.0058	0.0968	0.0025		1506	26	1459	30	1557	52		8.5	0.19	1.87	7.4	0.92	44.9	15.7	206	79.2	341	66.8	589	112	106.5	231			TT39#26	0	13.8889	2	4.00428	48.366	15.8621	218.491	419.786	811.024	1399.29	2060.42	2619.61	3464.71	4409.45		0.154302	1459
TT39#27	0.281	0.016	0.0414	0.001	0.0484	0.0025		250	13	261.5	6.2	120	120		6.1		0.16	1.2	0.1	9.4	3.6	57	24.7	115	27.4	291	65.7	158	464			TT39#27	0	9.96732	0	0.342612	7.84314	1.72414	45.7421	96.2567	224.409	436.396	694.864	1074.51	1711.76	2586.61		0.0910268	261.5
TT39#28	0.302	0.015	0.0413	0.00087	0.0524	0.0025		267	12	260.8	5.4	260	100		16.9	0.064	2.7	5.2	0.48	27.1	11.1	127	42	207	42.7	451	84.4	256	436			TT39#28	0	27.6144	0.673684	5.78158	33.9869	8.27586	131.873	296.791	500	742.049	1250.76	1674.51	2652.94	3322.83		0.123617	260.8
TT39#29	2.184	0.085	0.187	0.0045	0.084	0.002		1170	27	1104	25	1280	47		1.7		0.64	3.2	0.11	40	13.7	195	76	327	62.4	604	113	106	543			TT39#29	0	2.77778	0	1.37045	20.915	1.89655	194.647	366.31	767.717	1342.76	1975.83	2447.06	3552.94	4448.82		0.0297243	1104
TT39#30	0.58	0.022	0.073	0.0016	0.0576	0.0024		463	14	454	9.5	501	85		6		0.18	0.16	0.12	4.9	1.82	27.5	13.2	66	16.3	193	37.3	56.7	446			TT39#30	0	9.80392	0	0.385439	1.04575	2.06897	23.8443	48.6631	108.268	233.216	398.792	639.216	1135.29	1468.5		0.41433	454
TT39#31	0.651	0.041	0.0833	0.0022	0.0569	0.0039		504	26	515	13	440	150		4.7	0.11	1.18	3.3	0.27	23.3	6.6	78	25.8	115	22	187	37.3	94	159			TT39#31	0	7.67974	1.15789	2.52677	21.5686	4.65517	113.382	176.471	307.087	455.83	694.864	862.745	1100	1468.5		0.0941353	515
TT39#32	4.19	0.2	0.2616	0.0096	0.1162	0.0043		1659	39	1495	48	1886	61	0.46	16.4	0.35	3	5.8	0.42	18.3	6	63.2	27.4	112	25.4	239	47.4	69.2	118			TT39#32	1.94093	26.7974	3.68421	6.42398	37.9085	7.24138	89.0511	160.428	248.819	484.099	676.737	996.078	1405.88	1866.14		0.124633	1495
TT39#33	1.117	0.047	0.1233	0.0039	0.0652	0.0019		757	23	749	22	761	64				0.74	1.95		17.9	4.35	46.8	15.5	52.5	11.9	140	28.2	26.5	472			TT39#33	0	0	0	1.58458	12.7451	0	87.1046	116.31	184.252	273.852	317.221	466.667	823.529	1110.24		0	749
TT39#34	0.189	0.028	0.0294	0.0017	0.0501	0.0081		176	25	186	10	-10	280		27.5	0.016	1.01	3.6	1.05	18.3	5.7	71	27.2	130	23.9	252	51.3	70	93			TT39#34	0	44.9346	0.168421	2.16274	23.5294	18.1034	89.0511	152.406	279.528	480.565	785.498	937.255	1482.35	2019.69		0.395491	186
TT39#35	0.621	0.022	0.0795	0.0017	0.0565	0.0021		489	14	493.3	9.9	439	83		15.1	0.048	1.13	2.42		20.9	5.6	65	24.4	114	23.3	191	35.8	193	641			TT39#35	0	24.6732	0.505263	2.4197	15.817	0	101.703	149.733	255.906	431.095	688.822	913.725	1123.53	1409.45		0	493.3
TT39#36	0.525	0.04	0.0659	0.0015	0.0575	0.0042		423	26	411.1	9	410	150		3.4		1.08	3.6	0.41	15.9	5.5	75	27.8	131	27.8	252	52.1	86.4	193			TT39#36	0	5.55556	0	2.31263	23.5294	7.06897	77.3723	147.059	295.276	491.166	791.541	1090.2	1482.35	2051.18		0.165675	411.1
TT39#37	0.647	0.031	0.0798	0.0018	0.0586	0.0025		504	19	495	11	512	94	8.2	30.7	3.92	25.4	17.5	0.61	78	23.7	237	82.3	309	60.6	512	91.3	121	300			TT39#37	34.5992	50.1634	41.2632	54.3897	114.379	10.5172	379.562	633.69	933.071	1454.06	1867.07	2376.47	3011.76	3594.49		0.0504763	495
TT39#38	0.55	0.024	0.0715	0.0014	0.0555	0.0023		443	16	445	8.5	395	92		16.8	0.58	13.5	21.8	0.96	95	28.7	302	101.1	426	84	734	128	458	503			TT39#38	0	27.451	6.10526	28.9079	142.484	16.5517	462.287	767.38	1188.98	1786.22	2574.02	3294.12	4317.65	5039.37		0.0644918	445
TT39#39	0.233	0.011	0.03099	0.00067	0.055	0.0027		212.3	9	196.7	4.2	360	100	6.4	55	8.2	39.8	21.8	6.6	67	16.5	171	64	310	80	800	165	301	1046			TT39#39	27.0042	89.8693	86.3158	85.2248	142.484	113.793	326.034	441.176	673.228	1130.74	1873.11	3137.25	4705.88	6496.06		0.527961	196.7
TT39#40	0.208	0.013	0.02908	0.00063	0.0511	0.0031		191	11	184.8	3.9	230	130		36.9	0.039	0.44	1.64	0.26	15.2	5.9	104	45.8	247	59.2	635	133	201	528			TT39#40	0	60.2941	0.410526	0.942184	10.719	4.48276	73.9659	157.754	409.449	809.187	1492.45	2321.57	3735.29	5236.22		0.159204	184.8
TT39#41	1.434	0.065	0.151	0.0035	0.069	0.0033		902	28	906	19	840	100		2.6	0.013	1.42	3.3	0.15	19.5	8	87	35.9	135	31.2	269	45.6	80	122.3			TT39#41	0	4.24837	0.136842	3.04069	21.5686	2.58621	94.8905	213.904	342.52	634.276	815.71	1223.53	1582.35	1795.28		0.0571664	906
TT39#42	0.283	0.016	0.04044	0.00095	0.051	0.0033		252	13	255.5	5.9	190	130		8.1	0.062	1.98	3.3	0.11	23.5	8.8	84	40.4	165	40.1	330	78	198	514			TT39#42	0	13.2353	0.652632	4.23983	21.5686	1.89655	114.355	235.294	330.709	713.781	996.979	1572.55	1941.18	3070.87		0.0381879	255.5
TT39#43	0.634	0.017	0.0788	0.0012	0.0583	0.0017		500	11	488.7	7	523	62	0.023	4.9	0.14	3.4	6.3		44	17.7	193	72	317	61	560	115	330	890			TT39#43	0.0970464	8.00654	1.47368	7.28051	41.1765	0	214.112	473.262	759.843	1272.08	1915.41	2392.16	3294.12	4527.56		0	488.7
TT39#44	0.306	0.029	0.0419	0.0012	0.0531	0.005		267	23	264.3	7.6	230	200		15.7	0.071	0.51	2.46	0.78	13.8	3.49	55	19.7	101	22.3	225	45	138	132			TT39#44	0	25.6536	0.747368	1.09208	16.0784	13.4483	67.1533	93.3155	216.535	348.057	610.272	874.51	1323.53	1771.65		0.409271	264.3
TT39#45	0.256	0.031	0.0345	0.0015	0.0564	0.0072		231	26	218.4	9.4	260	250		1.83	0.121	1.71	3.2	0.68	15.4	5.6	60	22.6	109	20.8	221	49.3	46.4	111			TT39#45	0	2.9902	1.27368	3.66167	20.915	11.7241	74.9392	149.733	236.22	399.293	658.61	815.686	1300	1940.94		0.29614	218.4
TT39#46	0.277	0.017	0.04023	0.00083	0.0496	0.0029		246	13	254.2	5.2	140	120		11.7	0.16	2.77	8.2	0.66	40.6	15.4	178	63.7	276	62.7	566	106	238	473			TT39#46	0	19.1176	1.68421	5.93148	53.5948	11.3793	197.567	411.765	700.787	1125.44	1667.67	2458.82	3329.41	4173.23		0.110585	254.2
TT39#47	0.562	0.036	0.0713	0.0035	0.0569	0.0023		449	24	443	21	453	90	2.86	27.5	2.56	14.3	7.6	1.26	31.5	8.3	106	42.7	207	48.1	521	92	231	717			TT39#47	12.0675	44.9346	26.9474	30.621	49.6732	21.7241	153.285	221.925	417.323	754.417	1250.76	1886.27	3064.71	3622.05		0.248961	443
TT39#48	0.554	0.028	0.0719	0.0016	0.0557	0.0027		445	18	447.7	9.7	400	110		7.6	0.048	2.54	4.8	0.55	28.4	10.2	147	56.6	250	55.1	510	100	166	417			TT39#48	0	12.4183	0.505263	5.43897	31.3725	9.48276	138.2	272.727	578.74	1000	1510.57	2160.78	3000	3937.01		0.144015	447.7
TT39#49	0.462	0.055	0.059	0.0028	0.0586	0.0075		374	38	369	17	330	250		40	0.117	2.8	5.3	2.66	21.3	9.5	116	40.8	223	46.2	441	104	75.3	72.2			TT39#49	0	65.3595	1.23158	5.99572	34.6405	45.8621	103.65	254.011	456.693	720.848	1347.43	1811.76	2594.12	4094.49		0.765381	369
TT39#50	0.272	0.018	0.0373	0.0011	0.053	0.0036		242	14	235.9	6.8	280	150		23.5	0.012	0.85	2.37	0.76	14.3	4.67	65	25.5	132	30.5	342	77	182	260			TT39#50	0	38.3987	0.126316	1.82013	15.4902	13.1034	69.5864	124.866	255.906	450.53	797.583	1196.08	2011.76	3031.5		0.399112	235.9
TT39#51	0.658	0.024	0.0807	0.0017	0.0591	0.0023		512	15	500	10	535	85		1.8	0.02	1.13	4.5	0.045	28.2	12.8	148	59	271	59.2	519	97	102	462			TT39#51	0	2.94118	0.210526	2.4197	29.4118	0.775862	137.226	342.246	582.677	1042.4	1637.46	2321.57	3052.94	3818.9		0.0122125	500
TT39#52	0.302	0.024	0.0402	0.0011	0.0542	0.0041		265	18	253.8	7	290	150		14	0.028	0.65	2.03	0.23	14.1	5.7	70	26.1	135	30.7	319	57.4	120	260			TT39#52	0	22.8758	0.294737	1.39186	13.268	3.96552	68.6131	152.406	275.591	461.131	815.71	1203.92	1876.47	2259.84		0.13143	253.8
TT39#53	1.026	0.057	0.115	0.0039	0.0649	0.0034		716	30	706	24	710	110		2.2	0.12	1.67	3.1	0.47	15.1	4.6	60	22.7	104	23.3	194	37.2	75	177			TT39#53	0	3.59477	1.26316	3.57602	20.2614	8.10345	73.4793	122.995	236.22	401.06	628.399	913.725	1141.18	1464.57		0.210016	706
TT39#54	0.205	0.017	0.02897	0.00082	0.0529	0.0039		193	14	184.1	5.1	250	150		23.1	0.26	2.5	5.4	0.92	33.7	8.3	113	41.3	193	47.5	484	98	265	473			TT39#54	0	37.7451	2.73684	5.35332	35.2941	15.8621	163.99	221.925	444.882	729.682	1166.16	1862.75	2847.06	3858.27		0.208497	184.1
TT39#55	0.649	0.028	0.0807	0.0015	0.058	0.0023		505	17	499.9	8.8	492	87		3.7		0.7	0.96		13.6	4.73	62	25.8	105	22.9	184	33.4	94	445			TT39#55	0	6.04575	0	1.49893	6.27451	0	66.18	126.471	244.094	455.83	634.441	898.039	1082.35	1314.96		0	499.9
TT39#56	0.223	0.026	0.0294	0.0011	0.0544	0.0063		201	21	187	6.8	270	230	8.3	34.3	1.55	5	1.81	0.96	8.9	4.03	44.5	15.4	75	15.7	173	32.3	84	156			TT39#56	35.0211	56.0458	16.3158	10.7066	11.8301	16.5517	43.309	107.754	175.197	272.085	453.172	615.686	1017.65	1271.65		0.731241	187
TT39#57	0.192	0.023	0.0293	0.0012	0.0505	0.0067		175	20	186.1	7.8	70	260		17.1	0.021	0.52	1.16	0.52	5.9	2.93	31.1	11.9	68.4	20.8	221	54.4	75	141			TT39#57	0	27.9412	0.221053	1.11349	7.5817	8.96552	28.7105	78.3422	122.441	210.247	413.293	815.686	1300	2141.73		0.607676	186.1
TT39#58	0.238	0.012	0.0329	0.0011	0.0519	0.0026		215.9	9.8	208.8	6.7	250	110	4.18	31.4	4.51	19.4	12.3	2.07	22.9	7.1	105	40.9	230	77	920	177	114	908			TT39#58	17.6371	51.3072	47.4737	41.5418	80.3922	35.6897	111.436	189.84	413.386	722.615	1389.73	3019.61	5411.76	6968.5		0.377071	208.8
TT39#59	0.225	0.019	0.0305	0.001	0.0544	0.005		204	16	193.6	6.3	260	170		13.5	0.14	2.52	3.8	1.1	14.4	5.2	68	28.5	145	36	389	77	125	196			TT39#59	0	22.0588	1.47368	5.39615	24.8366	18.9655	70.073	139.037	267.717	503.534	876.133	1411.76	2288.24	3031.5		0.454614	193.6
TT39#60	0.191	0.014	0.02854	0.00071	0.0486	0.0034		176	12	181.4	4.5	90	140		23.9	0.113	2.1	5.6	2.14	34.9	11.1	148	56.7	267	50.5	555	96.3	195	367			TT39#60	0	39.0523	1.18947	4.49679	36.6013	36.8966	169.83	296.791	582.677	1001.77	1613.29	1980.39	3264.71	3791.34		0.467984	181.4
TT39#61	0.299	0.016	0.04105	0.00087	0.0527	0.0029		264	12	259.3	5.4	270	110		11.8	0.009	0.41	2.81	0.4	18.1	6.8	87	40.1	172	44.3	471	84.4	178	449			TT39#61	0	19.281	0.0947368	0.877944	18.366	6.89655	88.0779	181.818	342.52	708.481	1039.27	1737.25	2770.59	3322.83		0.171471	259.3
TT39#62	0.288	0.016	0.04075	0.00079	0.0506	0.0027		256	12	257.4	4.9	200	120		11.8	0.05	1.96	4.2	0.68	28.2	9.7	131	49.9	234	46.7	468	91.7	186	398			TT39#62	0	19.281	0.526316	4.197	27.451	11.7241	137.226	259.358	515.748	881.625	1413.9	1831.37	2752.94	3610.24		0.191022	257.4
TT39#63	0.321	0.031	0.0417	0.0013	0.0576	0.0058		283	24	263.5	8	400	180	0.11	42.3	0.062	0.7	3	0.61	24.8	7.5	107	42.5	233	47.7	581	109	175	243			TT39#63	0.464135	69.1176	0.652632	1.49893	19.6078	10.5172	120.681	200.535	421.26	750.883	1407.85	1870.59	3417.65	4291.34		0.216206	263.5
TT39#64	0.313	0.023	0.0416	0.001	0.0546	0.0042		274	18	262.8	6.3	310	160	7.8	30.4	2.44	9.3	3.6	0.24	15.5	6.7	73	31.8	183	53.3	541	104	112	292			TT39#64	32.9114	49.6732	25.6842	19.9143	23.5294	4.13793	75.4258	179.144	287.402	561.837	1105.74	2090.2	3182.35	4094.49		0.098224	262.8
TT39#65	0.447	0.018	0.0604	0.0015	0.0541	0.0022		374	12	378.2	9.2	342	90		8.5			0.24	0.26	4.6	1.16	15.5	9.7	58.8	18.2	270	85.2	255	512			TT39#65	0	13.8889	0	0	1.56863	4.48276	22.3844	31.016	61.0236	171.378	355.287	713.725	1588.24	3354.33		0.756506	378.2
TT39#66	0.624	0.023	0.0779	0.0016	0.0575	0.0018		491	14	483.6	9.4	487	68		10.5		0.48	3.8	0.16	33	10.9	147	58.6	296	65.6	572	115	273	823			TT39#66	0	17.1569	0	1.02784	24.8366	2.75862	160.584	291.444	578.74	1035.34	1788.52	2572.55	3364.71	4527.56		0.0436812	483.6
TT39#67	0.288	0.023	0.0388	0.0013	0.0537	0.0042		254	18	245.3	7.8	270	160	0.039	73.9	0.16	1.44	4.1	1.66	24	9.4	112	43.4	227	48.6	546	112	202	265			TT39#67	0.164557	120.752	1.68421	3.08351	26.7974	28.6207	116.788	251.337	440.945	766.784	1371.6	1905.88	3211.76	4409.45		0.511604	245.3
TT39#68	0.279	0.019	0.03979	0.00085	0.0506	0.0035		248	15	251.5	5.3	170	150	0.074	21.1	0.41	5.7	10.7	0.73	40.2	11.4	145	44.7	197	40.1	364	57.5	237	300			TT39#68	0.312236	34.4771	4.31579	12.2056	69.9346	12.5862	195.62	304.813	570.866	789.753	1190.33	1572.55	2141.18	2263.78		0.107607	251.5
TT39#69	0.318	0.014	0.0432	0.0014	0.0534	0.0025		279	11	272.8	8.7	330	110	106	271	32.5	125	25.2	0.94	43.6	10.6	123	41.5	182	36.7	389	69.5	225	538			TT39#69	447.257	442.81	342.105	267.666	164.706	16.2069	212.165	283.422	484.252	733.216	1099.7	1439.22	2288.24	2736.22		0.0866978	272.8
TT39#70	0.207	0.021	0.0311	0.0012	0.0478	0.0044		189	18	197.3	7.5	30	180	0.016	5.4		1.42	1.84	0.58	13.3	4.28	49.3	18.9	93	21.8	265	41.8	74	307			TT39#70	0.0675105	8.82353	0	3.04069	12.0261	10	64.7202	114.439	194.094	333.922	561.934	854.902	1558.82	1645.67		0.35844	197.3
TT39#71	0.435	0.038	0.0558	0.0043	0.0558	0.002		360	27	349	26	414	82	0.95	9.5	1.3	5.8	3.7	1.14	11.7	4.32	70.5	31.6	198	53	640	114	213	965			TT39#71	4.00844	15.5229	13.6842	12.4197	24.183	19.6552	56.9343	115.508	277.559	558.304	1196.37	2078.43	3764.71	4488.19		0.529706	349
TT39#72	0.231	0.014	0.03474	0.00097	0.0475	0.003		210	12	220.1	6	80	130		19.1	0.46	7.6	11.8	1.14	49.5	14.9	170	54.4	228	46.8	457	73.4	315	417			TT39#72	0	31.2092	4.84211	16.2741	77.1242	19.6552	240.876	398.396	669.291	961.131	1377.64	1835.29	2688.24	2889.76		0.144207	220.1
TT39#73	0.308	0.018	0.04414	0.00097	0.0503	0.0027		271	14	278.4	6	170	110		13		0.046	1.37	0.44	16.3	5.7	87	36	197	39.1	381	77.6	110	368			TT39#73	0	21.2418	0	0.0985011	8.95425	7.58621	79.3187	152.406	342.52	636.042	1190.33	1533.33	2241.18	3055.12		0.284657	278.4
TT39#74	0.212	0.017	0.0301	0.0011	0.0526	0.0049		193	14	191.2	6.6	200	180		28.7	0.19	3.47	7.3	2.53	42.9	12.8	135	55.6	246	63.7	574	115	128	269			TT39#74	0	46.8954	2	7.43041	47.7124	43.6207	208.759	342.246	531.496	982.332	1486.4	2498.04	3376.47	4527.56		0.437073	191.2
TT39#75	0.2	0.024	0.02859	0.00087	0.0512	0.0063		181	20	181.7	5.5	100	230		10.5	0.039	1.03	3.2	0.58	17	5.56	70	22.8	110	26.7	219	40.8	93	155			TT39#75	0	17.1569	0.410526	2.20557	20.915	10	82.7251	148.663	275.591	402.827	664.653	1047.06	1288.24	1606.3		0.24041	181.7
TT39#76	0.298	0.017	0.0416	0.0013	0.0518	0.0026		263	13	262.9	8.3	240	110	15.5	47.8	5.88	35	10.1	0.67	25.7	10.6	111	45.7	232	57.1	542	101.2	221	506			TT39#76	65.4008	78.1046	61.8947	74.9465	66.0131	11.5517	125.061	283.422	437.008	807.42	1401.81	2239.22	3188.24	3984.25		0.127137	262.9
TT39#77	0.508	0.032	0.0635	0.0037	0.0575	0.0019		413	21	396	22	498	76	1.9	4.4	1.88	8.2	5.5	1.26	16.1	7.6	97	44.6	281	81	860	145	90	787			TT39#77	8.01688	7.18954	19.7895	17.5589	35.9477	21.7241	78.3455	203.209	381.89	787.986	1697.89	3176.47	5058.82	5708.66		0.409355	396
TT39#78	0.617	0.026	0.0804	0.0016	0.0551	0.0023		486	16	498.3	9.7	396	96		6.2	0.024	1.35	2.69	0.26	18.4	5.5	57.9	22.1	81	19.4	179	30.5	193	383			TT39#78	0	10.1307	0.252632	2.89079	17.5817	4.48276	89.5377	147.059	227.953	390.459	489.426	760.784	1052.94	1200.79		0.112983	498.3
TT39#79	0.989	0.024	0.1134	0.0021	0.063	0.0013		697	12	692	12	696	44		0.17		0.27	1.65		16.1	12.1	173	66.8	312	64.4	578	94	48	810			TT39#79	0	0.277778	0	0.578158	10.7843	0	78.3455	323.529	681.102	1180.21	1885.2	2525.49	3400	3700.79		0	692
TT39#80	1.354	0.07	0.1398	0.006	0.0695	0.0015		861	31	842	34	902	45	1.85	2.3	1.49	7.2	5.1	0.53	14.1	7.4	86	27.9	116	28.8	289	60.5	26.2	1019			TT39#80	7.80591	3.75817	15.6842	15.4176	33.3333	9.13793	68.6131	197.861	338.583	492.933	700.906	1129.41	1700	2381.89		0.191075	842
TT39#81	0.642	0.021	0.0796	0.0017	0.0591	0.0017		508	13	493.4	9.9	548	64		11.4	0.015	1.31	3.5	0.19	19.5	6.6	92	32.7	150	30.7	306	52.2	234	602			TT39#81	0	18.6275	0.157895	2.80514	22.8758	3.27586	94.8905	176.471	362.205	577.739	906.344	1203.92	1800	2055.12		0.0703114	493.4
TT39#82	0.281	0.012	0.03956	0.00092	0.0514	0.0023		250.5	9.7	250.1	5.7	229	97	0.049	15.3	0.18	1.45	2.3	0.5	14	6.48	84	29.9	176	41.7	455	86.4	255	746			TT39#82	0.206751	25	1.89474	3.10493	15.0327	8.62069	68.1265	173.262	330.709	528.269	1063.44	1635.29	2676.47	3401.57		0.26938	250.1
TT39#83	1.48	0.045	0.1545	0.0034	0.0696	0.002		919	18	926	19	910	55		8.4	0.129	1	4.2	0.091	25.4	9.1	120	44.6	203	41.7	394	67.4	170	393			TT39#83	0	13.7255	1.35789	2.14133	27.451	1.56897	123.601	243.316	472.441	787.986	1226.59	1635.29	2317.65	2653.54		0.0269354	926
TT39#84	0.299	0.015	0.0409	0.0011	0.054	0.0032		265	12	258.3	6.7	320	130	26.7	59	7	27.8	9.8	0.64	25	7	88	35.2	142	36.8	393	67.9	183	401			TT39#84	112.658	96.4052	73.6842	59.5289	64.0523	11.0345	121.655	187.166	346.457	621.908	858.006	1443.14	2311.76	2673.23		0.125003	258.3
TT39#85	0.287	0.015	0.03938	0.00088	0.0528	0.0029		255	12	249	5.4	270	120		4.7	0.012	0.94	4.6	0.018	31	11.9	138	59.6	284	56.8	535	99	152	444			TT39#85	0	7.67974	0.126316	2.01285	30.0654	0.310345	150.852	318.182	543.307	1053	1716.01	2227.45	3147.06	3897.64		0.00460825	249
TT39#86	0.59	0.031	0.0733	0.0026	0.058	0.0023		468	20	456	16	495	89		8.9	0.45	7	13.8	0.52	58	16.9	184	63.7	269	56.6	485	89	330	629			TT39#86	0	14.5425	4.73684	14.9893	90.1961	8.96552	282.238	451.872	724.409	1125.44	1625.38	2219.61	2852.94	3503.94		0.0561919	456
TT39#87	0.216	0.015	0.02945	0.00071	0.0534	0.0037		198	12	187.1	4.5	290	150	14.6	65	5.3	23	7.7	0.4	22.9	8.3	92	36.4	172	37.2	383	74	187	427			TT39#87	61.6034	106.209	55.7895	49.2505	50.3268	6.89655	111.436	221.925	362.205	643.11	1039.27	1458.82	2252.94	2913.39		0.0920917	187.1
TT39#88	0.21	0.017	0.03045	0.0007	0.0499	0.0042		192	15	193.3	4.4	150	170	5.3	42.6	1.52	8.1	6.3	0.56	30.8	9.3	121	52.8	265	59.2	606	106	133	353			TT39#88	22.3629	69.6078	16	17.3448	41.1765	9.65517	149.878	248.663	476.378	932.862	1601.21	2321.57	3564.71	4173.23		0.122904	193.3
TT39#89	0.279	0.019	0.0401	0.0013	0.0497	0.003		248	15	253.3	7.8	190	120	0.1	10	0.22	1.03	0.77	0.23	7.3	3.23	44.7	22.8	113	29	330	69.7	116	383			TT39#89	0.421941	16.3399	2.31579	2.20557	5.03268	3.96552	35.5231	86.3636	175.984	402.827	682.779	1137.25	1941.18	2744.09		0.296582	253.3
TT39#90	1.419	0.039	0.1461	0.0031	0.0699	0.0011		895	17	879	17	918	32	0.032	12.1	0.53	7.1	12.1	0.15	75	24.2	290	109	537	105	1060	182	765	1240			TT39#90	0.135021	19.7712	5.57895	15.2034	79.085	2.58621	364.964	647.059	1141.73	1925.8	3244.71	4117.65	6235.29	7165.35		0.0152227	879
TT39#91	0.63	0.02	0.0788	0.0016	0.0577	0.0014		495	12	488.7	9.6	501	55	0.74	2.4	0.42	1.19	1.94	0.55	4	1.9	25.7	9.6	46.4	9.8	116	27.9	146	1062			TT39#91	3.12236	3.92157	4.42105	2.54818	12.6797	9.48276	19.4647	50.8021	101.181	169.611	280.363	384.314	682.353	1098.43		0.603609	488.7
TT39#92	0.249	0.014	0.0347	0.0013	0.053	0.0027		225	12	219.9	7.9	290	110	4.26	29.9	3.98	22	13.4	3.86	36.7	12.1	124	44	208	48.1	544	102	225	644			TT39#92	17.9747	48.8562	41.8947	47.1092	87.5817	66.5517	178.589	323.529	488.189	777.385	1256.8	1886.27	3200	4015.75		0.53214	219.9
TT39#93	0.415	0.019	0.0559	0.0015	0.0539	0.0025		351	14	350.7	9.1	330	100		45.6	0.081	2.34	7.2	0.48	41.4	16.7	221	90	383	89	848	152	188	373			TT39#93	0	74.5098	0.852632	5.01071	47.0588	8.27586	201.46	446.524	870.079	1590.11	2314.2	3490.2	4988.24	5984.25		0.084996	350.7
TT39#94	0.538	0.026	0.0723	0.0023	0.0544	0.0025		435	17	450	14	360	100		9.2	0.048	0.91	2.8	0.42	18.3	5.64	75	28.3	158	39.4	350	70.8	150	354			TT39#94	0	15.0327	0.505263	1.94861	18.3007	7.24138	89.0511	150.802	295.276	500	954.683	1545.1	2058.82	2787.4		0.179378	450
TT39#95	0.651	0.03	0.082	0.0023	0.0571	0.0024		510	17	508	14	493	94	0.105	6	0.122	4	6.4	0.25	36.8	11.1	94	34.6	142	31.4	281	45.5	263	423			TT39#95	0.443038	9.80392	1.28421	8.56531	41.8301	4.31034	179.075	296.791	370.079	611.307	858.006	1231.37	1652.94	1791.34		0.0498023	508
TT39#96	0.653	0.017	0.0814	0.0015	0.0581	0.0014		509	11	504.3	8.8	519	54	0.114	3.9	0.24	2.09	2.9	0.35	15.1	6.1	83	31.8	146	32.5	312	53.6	211	1690			TT39#96	0.481013	6.37255	2.52632	4.47537	18.9542	6.03448	73.4793	163.102	326.772	561.837	882.175	1274.51	1835.29	2110.24		0.161698	504.3
TT39#97	0.635	0.029	0.0802	0.0026	0.0574	0.0022		496	18	497	16	471	89		23.2	0.084	1.51	4.8	0.53	20.4	7.5	86	37.5	194	47.6	431	81.1	340	682			TT39#97	0	37.9085	0.884211	3.2334	31.3725	9.13793	99.2701	200.535	338.583	662.544	1172.21	1866.67	2535.29	3192.91		0.163743	497
TT39#98	0.26	0.023	0.0326	0.0024	0.0567	0.0027		235	19	207	15	458	94	2.73	3.1	2.74	10.8	7.4	1.68	10.4	3.28	50	29.9	203	57	750	144	46	830			TT39#98	11.519	5.06536	28.8421	23.1263	48.366	28.9655	50.6083	87.7005	196.85	528.269	1226.59	2235.29	4411.76	5669.29		0.585464	207
TT39#99	0.354	0.022	0.0437	0.0011	0.0583	0.0034		305	16	277.3	7.4	490	130		11.3	0.099	1.83	5	0.49	26.4	12.3	151	55.4	234	56.3	519	89	234	425			TT39#99	0	18.4641	1.04211	3.91863	32.6797	8.44828	128.467	328.877	594.488	978.799	1413.9	2207.84	3052.94	3503.94		0.130387	277.3
TT39#100	0.247	0.013	0.03401	0.00079	0.0521	0.0023		223	10	215.6	4.9	265	99		3.5	0.015	1.29	4.3	0.24	25.1	10.8	136	61.1	266	60.1	653	110	137	698			TT39#100	0	5.71895	0.157895	2.76231	28.1046	4.13793	122.141	288.77	535.433	1079.51	1607.25	2356.86	3841.18	4330.71		0.0706259	215.6
TT39#101	0.641	0.024	0.0817	0.0019	0.0565	0.0017		501	15	506	11	451	65	0.52	5.4	0.31	2	3.2	0.04	15.7	7.01	103	42.3	202	43.3	440	72.2	134	970			TT39#101	2.19409	8.82353	3.26316	4.28266	20.915	0.689655	76.399	187.433	405.512	747.35	1220.54	1698.04	2588.24	2842.52		0.0172528	506
TT39#102	0.275	0.017	0.0393	0.0013	0.0513	0.0033		246	13	248.7	7.9	200	130		15.6	0.27	6.1	9.8	1.2	42	11.8	145	55.5	202	39.8	397	71.6	219	221			TT39#102	0	25.4902	2.84211	13.0621	64.0523	20.6897	204.38	315.508	570.866	980.565	1220.54	1560.78	2335.29	2818.9		0.180829	248.7
TT39#103	0.645	0.033	0.0795	0.002	0.059	0.0032		502	21	493	12	500	120	1.42	9.9	0.85	6.7	1.45	0.22	3.4	1.42	24.7	7.8	41	11.7	140	28.2	64.6	270			TT39#103	5.99156	16.1765	8.94737	14.3469	9.47712	3.7931	16.545	37.9679	97.2441	137.809	247.734	458.824	823.529	1110.24		0.302916	493
TT39#104	0.195	0.015	0.02923	0.00084	0.0495	0.0039		182	13	185.7	5.3	120	160		13.1	0.06	2.43	5.4	0.75	37.1	10.5	134	52.8	237	54.6	580	97	192	355			TT39#104	0	21.4052	0.631579	5.20343	35.2941	12.931	180.535	280.749	527.559	932.862	1432.02	2141.18	3411.76	3818.9		0.161995	185.7
TT39#105	0.321	0.015	0.04507	0.00093	0.0516	0.0022		282	11	284.1	5.7	240	95		4.5		0.14	1.5	0.13	11.1	4.6	77	29.3	171	45.2	431	81.5	186	761			TT39#105	0	7.35294	0	0.299786	9.80392	2.24138	54.0146	122.995	303.15	517.668	1033.23	1772.55	2535.29	3208.66		0.0974002	284.1
TT39#106	0.255	0.027	0.0382	0.0015	0.0486	0.0048		227	22	241.8	9.5	90	200	0.094	21.8	0.155	1.71	1.88	0.7	21.2	5.1	51.2	21.8	101	23.4	206	39.7	107	149			TT39#106	0.396624	35.6209	1.63158	3.66167	12.2876	12.069	103.163	136.364	201.575	385.159	610.272	917.647	1211.76	1562.99		0.338981	241.8
TT39#107	0.552	0.025	0.0721	0.0016	0.0553	0.0023		444	16	448.6	9.6	386	93		9.2	0.21	3.76	9.8	0.62	41.2	14.8	158	68.6	266	61.2	531	93	186	450			TT39#107	0	15.0327	2.21053	8.05139	64.0523	10.6897	200.487	395.722	622.047	1212.01	1607.25	2400	3123.53	3661.42		0.0943308	448.6
TT39#108	0.625	0.019	0.0791	0.0013	0.0569	0.0016		492	12	490.7	7.7	468	63	0.092	10.1	0.18	0.94	5.2	0.24	16.4	5.8	60.6	21.9	101	25	217	40.6	269	794			TT39#108	0.388186	16.5033	1.89474	2.01285	33.9869	4.13793	79.8054	155.08	238.583	386.926	610.272	980.392	1276.47	1598.43		0.0794532	490.7
TT39#109	0.605	0.022	0.0776	0.0016	0.0564	0.0019		479	14	481.9	9.3	439	75		0.09		0.18	1.07		9.7	4.18	42	15.7	49.2	9	66	9.3	12.8	782			TT39#109	0	0.147059	0	0.385439	6.99346	0	47.2019	111.765	165.354	277.385	297.281	352.941	388.235	366.142		0	481.9
TT39#110	0.613	0.023	0.0765	0.0018	0.0583	0.0025		484	15	475	11	496	95	0.13	14.9	0.139	1.74	3.4	0.29	19.5	6.5	92	32.4	159	38.2	351	67	139	349			TT39#110	0.548523	24.3464	1.46316	3.72591	22.2222	5	94.8905	173.797	362.205	572.438	960.725	1498.04	2064.71	2637.8		0.108884	475
TT39#111	0.605	0.034	0.0757	0.0022	0.0582	0.0034		477	21	470	13	470	130		4.8	0.094	3.9	6.7	0.33	30.4	9.2	99	31.2	142	26.8	233	42.2	89.5	176			TT39#111	0	7.84314	0.989474	8.35118	43.7908	5.68966	147.932	245.989	389.764	551.237	858.006	1050.98	1370.59	1661.42		0.0706909	470
TT39#112	1.447	0.067	0.1504	0.0037	0.07	0.0029		907	29	903	21	886	90		2	0.019	1.15	3.4		24.7	8.3	89	37.8	171	30.9	349	60.9	60.6	146			TT39#112	0	3.26797	0.2	2.46253	22.2222	0	120.195	221.925	350.394	667.845	1033.23	1211.76	2052.94	2397.64		0	903
TT39#113	0.652	0.057	0.0826	0.0024	0.0568	0.0046		500	34	511	15	380	160		9.3	0.041	0.5	2.7	0.37	13.9	5.8	62	21.8	103	22.4	249	45	51.4	84.4			TT39#113	0	15.1961	0.431579	1.07066	17.6471	6.37931	67.6399	155.08	244.094	385.159	622.356	878.431	1464.71	1771.65		0.184644	511
TT39#114	0.292	0.013	0.04103	0.00091	0.052	0.0023		261	10	259.2	5.6	253	97	0.26	13.7	0.23	2.22	3.6	0.19	33.6	10.8	137	49.8	228	49.6	509	95	277	667			TT39#114	1.09705	22.3856	2.42105	4.75375	23.5294	3.27586	163.504	288.77	539.37	879.859	1377.64	1945.1	2994.12	3740.16		0.0528149	259.2
TT39#115	0.679	0.035	0.0835	0.002	0.0587	0.0026		523	20	517	12	510	94		1.36	0.1	1.74	4.6		27.4	8.4	94	36.7	151	30.6	295	51.1	113	268			TT39#115	0	2.22222	1.05263	3.72591	30.0654	0	133.333	224.599	370.079	648.41	912.387	1200	1735.29	2011.81		0	517
TT39#116	0.288	0.017	0.04035	0.00078	0.0518	0.0027		255	13	254.9	4.8	230	110		14.9	0.111	2.9	8.3	0.81	40.9	14.9	196	74.9	338	61.7	664	115	297	568			TT39#116	0	24.3464	1.16842	6.20985	54.2484	13.9655	199.027	398.396	771.654	1323.32	2042.3	2419.61	3905.88	4527.56		0.134403	254.9
TT39#117	0.289	0.02	0.0393	0.001	0.0529	0.0035		256	16	248.5	6.2	300	150	0.109	10.8	0.59	9	11.5	1.27	54.5	17.7	198	69.8	304	62.4	591	101.7	263	457			TT39#117	0.459916	17.6471	6.21053	19.2719	75.1634	21.8966	265.207	473.262	779.528	1233.22	1836.86	2447.06	3476.47	4003.94		0.155089	248.5
TT39#118	0.428	0.05	0.0544	0.0057	0.0583	0.0029		352	34	340	35	490	110	2.21	13.4	2.29	13.2	12.2	1.85	30.4	9.3	133	51.4	263	66	790	142	136	600			TT39#118	9.32489	21.8954	24.1053	28.2655	79.7386	31.8966	147.932	248.663	523.622	908.127	1589.12	2588.24	4647.06	5590.55		0.293683	340
TT39#119	0.649	0.026	0.0787	0.0021	0.0587	0.0019		506	16	488	13	560	68	0.17	3.9	0.33	2.9	6.1	0.32	40	15.8	211	81	373	74.9	717	127	230	1090			TT39#119	0.7173	6.37255	3.47368	6.20985	39.8693	5.51724	194.647	422.46	830.709	1431.1	2253.78	2937.25	4217.65	5000		0.0626295	488
TT39#120	0.289	0.011	0.0402	0.00075	0.0521	0.002		257.5	8.5	254.1	4.7	260	82		11.8	0.047	0.62	4.1	0.099	27.3	11	141	60.6	288	61.8	656	117	414	1001			TT39#120	0	19.281	0.494737	1.32762	26.7974	1.7069	132.847	294.118	555.118	1070.67	1740.18	2423.53	3858.82	4606.3		0.0286079	254.1
TT39#121	0.611	0.069	0.0662	0.0032	0.068	0.0065		486	46	413	19	760	180	0.17	6.4	0.168	1.32	0.28	0.13	2.8	1.73	26.3	10.9	44.3	13	158	29.7	41.3	208			TT39#121	0.7173	10.4575	1.76842	2.82655	1.83007	2.24138	13.6253	46.2567	103.543	192.58	267.674	509.804	929.412	1169.29		0.448858	413
TT39#122	2.683	0.088	0.2292	0.0067	0.0848	0.0016		1319	25	1329	35	1304	37	0.056	21.7	0.072	1	5	0.35	39.5	15.9	217	82.3	439	95	840	154	184	760			TT39#122	0.236287	35.4575	0.757895	2.14133	32.6797	6.03448	192.214	425.134	854.331	1454.06	2652.57	3725.49	4941.18	6062.99		0.0761392	1329
TT39#123	0.607	0.016	0.0778	0.0012	0.0567	0.0017		481	10	482.8	6.9	456	66		11.1		1.49	3	0.34	20.4	6.9	99	36.7	182	49.3	497	90.6	234	739			TT39#123	0	18.1373	0	3.19058	19.6078	5.86207	99.2701	184.492	389.764	648.41	1099.7	1933.33	2923.53	3566.93		0.13287	482.8
TT79#01	0.537	0.072	0.0714	0.0039	0.0536	0.007		419	47	444	23	220	250		1.14	0.049	0.18	1.19	0.065	12.9	3.57	56	20.6	94	23	217	49.4	31.8	59.7			TT79#01	0	1.86275	0.515789	0.385439	7.77778	1.12069	62.7737	95.4545	220.472	363.958	567.976	901.961	1276.47	1944.88		0.0507188	444
TT79#02	0.551	0.029	0.0697	0.0018	0.0566	0.0025		443	19	434	11	448	99		5.4		0.09	1.2	0.027	13.7	5	67	29.9	137	27.8	305	59.9	184	457			TT79#02	0	8.82353	0	0.192719	7.84314	0.465517	66.6667	133.69	263.78	528.269	827.795	1090.2	1794.12	2358.27		0.0203581	434
TT79#03	0.602	0.049	0.0738	0.0034	0.0589	0.0044		471	31	458	20	470	160		4.1		0.51	1.5		17	5.9	83	27.5	137	27.6	269	55.5	139	182			TT79#03	0	6.69935	0	1.09208	9.80392	0	82.7251	157.754	326.772	485.866	827.795	1082.35	1582.35	2185.04		0	458
TT79#04	0.602	0.026	0.0756	0.0017	0.0573	0.0024		480	15	470	10	473	94		5.8		0.36	2.77	0.088	11.5	5.2	59.2	24.1	120	28.3	269	53.9	271	317			TT79#04	0	9.47712	0	0.770878	18.1046	1.51724	55.9611	139.037	233.071	425.795	725.076	1109.8	1582.35	2122.05		0.047667	470
TT79#05	0.4995	0.0086	0.06306	0.00073	0.05712	0.00085		411.1	5.9	394.2	4.4	489	33	2.75	21.8	3.44	23.6	11.9	1.41	25.1	8.5	90	37.5	180	42.8	479	82.7	214	3650			TT79#05	11.6034	35.6209	36.2105	50.5353	77.7778	24.3103	122.141	227.273	354.331	662.544	1087.61	1678.43	2817.65	3255.91		0.249421	394.2
TT79#06	0.545	0.013	0.0697	0.001	0.0565	0.0014		441.4	8.4	434.1	6.2	459	53	0.043	6.2	0.137	2.08	4.3	0.31	21.5	6.9	115	42.3	227	50	549	103	408	1710			TT79#06	0.181435	10.1307	1.44211	4.45396	28.1046	5.34483	104.623	184.492	452.756	747.35	1371.6	1960.78	3229.41	4055.12		0.0985671	434.1
TT79#07	0.675	0.028	0.08	0.0019	0.0611	0.0019		522	17	496	11	642	63		1.9		0.58	1.04	0.35	5.8	3.48	38.1	21.1	122	31.4	432	84.4	110	991			TT79#07	0	3.10458	0	1.24197	6.79739	6.03448	28.2238	93.0481	150	372.792	737.16	1231.37	2541.18	3322.83		0.435673	496
TT79#08	1.192	0.077	0.1268	0.0044	0.0691	0.0037		795	35	769	26	840	120		5.3	0.011	0.23	1.87	0.022	15.6	6.4	83	32.2	153	36.7	410	87	82	291			TT79#08	0	8.66013	0.115789	0.492505	12.2222	0.37931	75.9124	171.123	326.772	568.905	924.471	1439.22	2411.76	3425.2		0.0124527	769
TT79#09	0.4	0.042	0.0471	0.0019	0.0623	0.0065		336	30	296	12	580	230		2.2		0.42	1.71	0.02	7.8	2.68	43.5	15.1	70	17.8	174	32.6	125	176			TT79#09	0	3.59477	0	0.899358	11.1765	0.344828	37.9562	71.6578	171.26	266.784	422.961	698.039	1023.53	1283.46		0.016742	296
TT79#10	0.59	0.044	0.068	0.0037	0.0617	0.0019		465	28	424	22	669	65		2.6	0.01	0.86	1.73	0.22	12.5	5.1	69	33.2	169	43.8	485	108	120	901			TT79#10	0	4.24837	0.105263	1.84154	11.3072	3.7931	60.8273	136.364	271.654	586.572	1021.15	1717.65	2852.94	4251.97		0.144633	424
TT79#11	0.616	0.026	0.0768	0.0014	0.0576	0.0025		485	16	477.1	8.7	491	97		10.2	0.016	0.26	2.42	0.082	19.2	7.7	90	41	178	37.6	409	62	240	453			TT79#11	0	16.6667	0.168421	0.556745	15.817	1.41379	93.4307	205.882	354.331	724.382	1075.53	1474.51	2405.88	2440.94		0.0367772	477.1
TT79#12	0.541	0.058	0.0674	0.0034	0.0602	0.0062		434	40	420	20	450	220		0.67			0.28	0.024	2.8	1.59	22.6	9.5	48.1	11.7	164	30.8	55.1	99.1			TT79#12	0	1.09477	0	0	1.83007	0.413793	13.6253	42.5134	88.9764	167.845	290.634	458.824	964.706	1212.6		0.0828661	420
TT79#13	0.416	0.032	0.0547	0.0016	0.0563	0.0046		354	24	343.4	9.9	350	170		2.8			0.36		4.2	2.09	28	11	69.1	18.3	185	37.6	75	197			TT79#13	0	4.57516	0	0	2.35294	0	20.438	55.8824	110.236	194.346	417.523	717.647	1088.24	1480.31		0	343.4
TT79#14	0.687	0.031	0.0875	0.0031	0.0568	0.0018		528	18	540	18	475	64		3.3	0.046	1	0.35	0.019	3.3	1.85	30.4	14.4	90	26.2	246	59	114	1270			TT79#14	0	5.39216	0.484211	2.14133	2.28758	0.327586	16.0584	49.4652	119.685	254.417	543.807	1027.45	1447.06	2322.83		0.0540488	540
TT79#15	0.582	0.038	0.0747	0.0022	0.0562	0.0035		461	25	464	13	410	140		5.2		0.59	1.38	0.12	10.8	5.6	62	25.7	113	24.4	252	45.3	121	177			TT79#15	0	8.49673	0	1.26338	9.01961	2.06897	52.5547	149.733	244.094	454.064	682.779	956.863	1482.35	1783.46		0.0950284	464
TT79#16	0.51	0.032	0.0688	0.0016	0.0535	0.0032		415	21	429.1	9.6	300	130		6.1		0.55	2.9	0.022	14.9	6.2	96	35.8	180	36.1	325	63	183	211			TT79#16	0	9.96732	0	1.17773	18.9542	0.37931	72.5061	165.775	377.953	632.509	1087.61	1415.69	1911.76	2480.31		0.0102319	429.1
TT79#17	0.559	0.055	0.0669	0.0027	0.0599	0.0061		439	36	417	17	460	210		1.52			0.69		4.7	1.4	29.9	11.3	52	12.2	134	26.9	57.8	71.6			TT79#17	0	2.48366	0	0	4.5098	0	22.871	37.4332	117.717	199.647	314.199	478.431	788.235	1059.06		0	417
TT79#18	0.613	0.072	0.0758	0.0037	0.0589	0.0066		469	45	470	22	380	220		1.23		0.8	1.67	0.078	8.7	4.05	60	24.5	116	26.3	241	50.7	68	92			TT79#18	0	2.0098	0	1.71306	10.915	1.34483	42.3358	108.289	236.22	432.862	700.906	1031.37	1417.65	1996.06		0.0625605	470
TT79#19	0.538	0.025	0.0695	0.0018	0.056	0.0023		435	16	433	11	418	90		5.5		0.14	1.49	0.23	16.1	5.1	61	30.1	139	35.7	335	71.7	204	503			TT79#19	0	8.98693	0	0.299786	9.73856	3.96552	78.3455	136.364	240.157	531.802	839.879	1400	1970.59	2822.83		0.143564	433
TT79#20	0.556	0.067	0.0665	0.0039	0.0634	0.0086		432	45	414	23	450	280		1.9		0.24	1.58	0.16	7.8	2.74	36.8	15.3	75	18.9	183	39.6	38	56			TT79#20	0	3.10458	0	0.513919	10.3268	2.75862	37.9562	73.262	144.882	270.318	453.172	741.176	1076.47	1559.06		0.139337	414
TT79#21	0.561	0.032	0.0707	0.0017	0.0571	0.0032		449	21	440	10	450	130		4.3		0.25	1.43		11.8	4.21	59	24.2	122	28.4	284	55.3	173	272			TT79#21	0	7.02614	0	0.535332	9.34641	0	57.4209	112.567	232.283	427.562	737.16	1113.73	1670.59	2177.17		0	440
TT79#22	0.579	0.036	0.0731	0.0018	0.0572	0.0037		464	24	455	11	440	140		2.9	0.015	0.37	1.62		6.8	2.88	52.4	20	92	22.4	213	44.4	85.4	147			TT79#22	0	4.73856	0.157895	0.792291	10.5882	0	33.09	77.0053	206.299	353.357	555.891	878.431	1252.94	1748.03		0	455
TT79#23	0.605	0.028	0.078	0.0033	0.0566	0.0018		478	18	484	20	451	73		6.2		0.41	2.13	0.18	13.8	5.4	78	37.9	198	52.9	519	128	105	790			TT79#23	0	10.1307	0	0.877944	13.9216	3.10345	67.1533	144.385	307.087	669.611	1196.37	2074.51	3052.94	5039.37		0.1015	484
TT79#24	0.429	0.031	0.0567	0.0022	0.0551	0.0041		358	22	355	13	330	150		5.3		0.06	1.21		7.3	3.42	58	17.7	99	24.1	259	48.9	124	243			TT79#24	0	8.66013	0	0.12848	7.9085	0	35.5231	91.4439	228.346	312.721	598.187	945.098	1523.53	1925.2		0	355
TT79#25	0.569	0.059	0.0704	0.0031	0.06	0.0069		446	37	438	18	400	210		1.96			1.47		3.2	2.17	26.3	12	59.5	13.6	140	30.1	50.3	79.5			TT79#25	0	3.20261	0	0	9.60784	0	15.5718	58.0214	103.543	212.014	359.517	533.333	823.529	1185.04		0	438
TT79#26	0.418	0.011	0.0555	0.0012	0.0544	0.0015		354.5	8.2	348	7.6	372	63	1.01	7.9	1.28	7.9	4.2	0.66	11.8	5.63	66.2	26.9	139	32.5	310	61.1	249	1620			TT79#26	4.2616	12.9085	13.4737	16.9165	27.451	11.3793	57.4209	150.535	260.63	475.265	839.879	1274.51	1823.53	2405.51		0.286617	348
TT79#27	0.531	0.045	0.068	0.0033	0.0565	0.0045		425	30	423	20	380	170		3.2	0.013	0.24	2.06		10.8	4.59	44.7	19.5	93	22.9	183	42.3	110	161			TT79#27	0	5.22876	0.136842	0.513919	13.4641	0	52.5547	122.727	175.984	344.523	561.934	898.039	1076.47	1665.35		0	423
TT79#28	0.646	0.016	0.0811	0.0016	0.05735	0.00086		505	10	502.8	9.7	499	34	1.44	6.5	0.38	2.1	1.87	0.16	16.6	6.4	78	37.7	206	48.7	520	104.4	325	3700			TT79#28	6.07595	10.6209	4	4.49679	12.2222	2.75862	80.7786	171.123	307.087	666.078	1244.71	1909.8	3058.82	4110.24		0.0877948	502.8
TT79#29	0.446	0.048	0.0579	0.0032	0.0559	0.0063		365	35	362	20	330	240		2.9	0.045	1.57	1.5	0.068	8	3.2	39.1	14.7	73	17.8	178	32.7	61.8	83			TT79#29	0	4.73856	0.473684	3.36188	9.80392	1.17241	38.9294	85.5615	153.937	259.717	441.088	698.039	1047.06	1287.4		0.0600125	362
TT79#30	0.58	0.062	0.0716	0.0038	0.0573	0.0057		452	39	445	23	390	200		2.3			1		5.4	2.33	32.2	11.5	59.7	16.2	146	30.1	91	90.2			TT79#30	0	3.75817	0	0	6.53595	0	26.2774	62.2995	126.772	203.18	360.725	635.294	858.824	1185.04		0	445
TT79#31	0.814	0.062	0.0891	0.0042	0.0663	0.0028		603	35	550	25	779	88		3.9		0.06	0.46	0.017	6.6	1.96	38.1	13.6	81	22.2	229	49.8	92	565			TT79#31	0	6.37255	0	0.12848	3.00654	0.293103	32.1168	52.4064	150	240.283	489.426	870.588	1347.06	1960.63		0.0298278	550
TT79#32	0.932	0.093	0.0978	0.007	0.068	0.0036		647	54	600	42	840	110		4.2		0.26	1.78	0.18	4.9	2.92	40.6	16.4	74	18.1	175	38.4	79	301			TT79#32	0	6.86275	0	0.556745	11.634	3.10345	23.8443	78.0749	159.843	289.753	447.13	709.804	1029.41	1511.81		0.186332	600
TT79#33	0.597	0.018	0.0752	0.001	0.0572	0.0016		474	11	467.5	6.2	481	62		8.7	0.057	0.96	4.9	0.28	22.9	12.2	143	57.3	302	69.3	617	120	568	1160			TT79#33	0	14.2157	0.6	2.05567	32.0261	4.82759	111.436	326.203	562.992	1012.37	1824.77	2717.65	3629.41	4724.41		0.0808101	467.5
TT79#34	0.558	0.054	0.0752	0.0032	0.0543	0.0055		441	34	467	19	240	200		1.22		0.08	0.65		4.7	1.32	22.7	8.8	54.6	11.4	130	27.3	43.9	74.1			TT79#34	0	1.99346	0	0.171306	4.24837	0	22.871	35.2941	89.3701	155.477	329.909	447.059	764.706	1074.8		0	467
TT79#35	0.518	0.026	0.0657	0.0015	0.057	0.0026		422	17	410.4	9.3	460	100		5.5		0.69	1.66	0.11	18.2	6.8	102	36	181	42	384	75	266	555			TT79#35	0	8.98693	0	1.47752	10.8497	1.89655	88.5645	181.818	401.575	636.042	1093.66	1647.06	2258.82	2952.76		0.0611824	410.4
TT79#36	0.726	0.036	0.0899	0.0033	0.0582	0.0015		551	21	555	19	521	57		0.1					1.07	1.29	11.7	9.8	57	18.1	230	53.9	42.8	850			TT79#36	0	0.163399	0	0	0	0	5.20681	34.492	46.063	173.145	344.411	709.804	1352.94	2122.05		#DIV/0!	555
TT79#37	0.486	0.027	0.0614	0.0021	0.0583	0.0042		399	19	384	13	480	150		3		0.21	1.11	0.02	8.5	3.3	51	17.7	84	20.7	212	41.8	109	276			TT79#37	0	4.90196	0	0.449679	7.2549	0.344828	41.3625	88.2353	200.787	312.721	507.553	811.765	1247.06	1645.67		0.0199059	384
TT79#38	0.58	0.043	0.0737	0.0029	0.0565	0.0038		458	27	458	17	420	150		3.8		0.08	0.66		13.6	3.39	52.7	20.7	89	22.1	182	40.6	61.2	112.9			TT79#38	0	6.20915	0	0.171306	4.31373	0	66.18	90.6417	207.48	365.724	537.764	866.667	1070.59	1598.43		0	458
TT79#39	0.568	0.052	0.0704	0.0026	0.06	0.0056		453	36	438	16	460	200		2.7		0.1	0.56		1.9	1.83	18.7	10.8	51.2	15.7	144	26.6	44.6	71.3			TT79#39	0	4.41176	0	0.214133	3.66013	0	9.24574	48.9305	73.622	190.813	309.366	615.686	847.059	1047.24		0	438
TT79#40	0.534	0.044	0.0716	0.0028	0.0534	0.0037		428	30	445	17	280	150		3.1		1.1	2.4		15.2	5.17	63	28	135	25.8	247	46.2	97	164			TT79#40	0	5.06536	0	2.35546	15.6863	0	73.9659	138.235	248.031	494.7	815.71	1011.76	1452.94	1818.9		0	445
TT79#41	0.58	0.043	0.0735	0.0034	0.0571	0.0036		458	28	457	20	420	130		3		0.35	0.52		3.9	2.1	34.6	13.8	69	15.9	178	31.2	83.3	201			TT79#41	0	4.90196	0	0.749465	3.39869	0	18.9781	56.1497	136.22	243.816	416.918	623.529	1047.06	1228.35		0	457
TT79#42	0.614	0.063	0.0744	0.003	0.0587	0.006		473	39	462	18	420	210		3.3		0.88	0.58	0.21	14.7	3.56	55.7	25.3	117	24.4	248	47.9	76.4	71.7			TT79#42	0	5.39216	0	1.88437	3.79085	3.62069	71.5328	95.1872	219.291	446.996	706.949	956.863	1458.82	1885.83		0.219872	462
TT79#43	0.558	0.018	0.0714	0.0013	0.0567	0.0019		449	11	444.6	7.7	452	73		3.9	0.011	0.37	0.47		6.4	4.8	62.1	23.7	148	31.2	363	70.5	140	992			TT79#43	0	6.37255	0.115789	0.792291	3.0719	0	31.1436	128.342	244.488	418.728	894.26	1223.53	2135.29	2775.59		0	444.6
TT79#44	0.593	0.026	0.0748	0.0018	0.0576	0.0027		471	17	465	11	480	100		5.3		1.21	1.95		10.2	4.94	58.6	26.4	119	28.5	256	42.2	169	308			TT79#44	0	8.66013	0	2.59101	12.7451	0	49.635	132.086	230.709	466.431	719.033	1117.65	1505.88	1661.42		0	465
TT79#45	0.314	0.038	0.0398	0.0015	0.0565	0.0069		272	29	251.2	9.3	360	240		3.9		1.11	2.1	0.23	20.4	6.9	77	33.1	158	36	361	67.1	107	180			TT79#45	0	6.37255	0	2.37687	13.7255	3.96552	99.2701	184.492	303.15	584.806	954.683	1411.76	2123.53	2641.73		0.10743	251.2
TT79#46	0.456	0.027	0.0557	0.0019	0.0587	0.0031		379	19	352	13	500	120		4.3	0.025	0.24	1.07	0.025	7.5	2.29	37.9	17	92	22.8	228	52.6	110	355			TT79#46	0	7.02614	0.263158	0.513919	6.99346	0.431034	36.4964	61.2299	149.213	300.353	555.891	894.118	1341.18	2070.87		0.0269799	352
TT79#47	0.549	0.036	0.0682	0.0025	0.0581	0.0033		442	23	425	15	490	120		4.3		0.23	1.17	0.066	9.3	4.21	60.7	22.8	102	24.3	230	50.8	102	347			TT79#47	0	7.02614	0	0.492505	7.64706	1.13793	45.2555	112.567	238.976	402.827	616.314	952.941	1352.94	2000		0.0611693	425
TT79#48	0.582	0.026	0.0723	0.0016	0.0582	0.0027		464	17	449.8	9.7	500	100	0.064	5.3		0.52	1.8	0.054	11.6	5.5	51.3	27.2	130	30.2	286	57.3	187	456			TT79#48	0.270042	8.66013	0	1.11349	11.7647	0.931034	56.4477	147.059	201.969	480.565	785.498	1184.31	1682.35	2255.91		0.0361287	449.8
TT79#49	0.577	0.047	0.0709	0.0025	0.059	0.0046		455	30	441	15	460	160		2.6		0.48	1		9.2	1.99	36	14.5	62	14.5	144	29.7	60.9	107.9			TT79#49	0	4.24837	0	1.02784	6.53595	0	44.7689	53.2086	141.732	256.184	374.622	568.627	847.059	1169.29		0	441
TT79#50	0.484	0.029	0.0614	0.0017	0.0563	0.0032		397	20	384	10	420	130		5.9		0.8	1.24	0.084	12.5	4.63	60	28.2	124	32.3	346	62.4	209	358			TT79#50	0	9.64052	0	1.71306	8.10458	1.44828	60.8273	123.797	236.22	498.233	749.245	1266.67	2035.29	2456.69		0.0652285	384
TT79#51	0.538	0.025	0.0705	0.0023	0.056	0.0024		435	17	439	14	411	94		2.8		0.25	0.54		13.3	5	55	27.5	141	29.5	342	67.4	243	495			TT79#51	0	4.57516	0	0.535332	3.52941	0	64.7202	133.69	216.535	485.866	851.964	1156.86	2011.76	2653.54		0	439
TT79#52	0.543	0.036	0.0709	0.0031	0.0556	0.0031		440	25	441	18	400	130		5.1			0.39		11.5	3.18	39.6	15.3	83	21.6	232	42.4	113	239			TT79#52	0	8.33333	0	0	2.54902	0	55.9611	85.0267	155.906	270.318	501.511	847.059	1364.71	1669.29		0	441
TT79#53	0.582	0.04	0.0766	0.0021	0.0555	0.0043		460	26	476	13	330	150		3.7		0.59	2.5	0.047	9	3.98	62	24.5	111	23.8	225	46	110	217			TT79#53	0	6.04575	0	1.26338	16.3399	0.810345	43.7956	106.417	244.094	432.862	670.695	933.333	1323.53	1811.02		0.0302922	476
TT79#54	0.596	0.027	0.0742	0.0018	0.059	0.0028		473	18	462	11	520	100		6.3		1.13	1.49	0.22	11.7	6	67.5	31.1	140	33.4	318	61.8	251	502			TT79#54	0	10.2941	0	2.4197	9.73856	3.7931	56.9343	160.428	265.748	549.47	845.921	1309.8	1870.59	2433.07		0.161087	462
TT79#55	0.559	0.059	0.0699	0.0039	0.0585	0.0042		452	36	435	23	480	160		4.8	0.015	0.32	0.82		6.7	2.58	41.7	17	83	21.2	233	48.5	96	308			TT79#55	0	7.84314	0.157895	0.685225	5.35948	0	32.6034	68.984	164.173	300.353	501.511	831.373	1370.59	1909.45		0	435
TT79#56	0.611	0.026	0.0768	0.0017	0.0577	0.0025		485	17	477	10	492	98		5.5	0.087	0.15	2.6	0.04	17.1	6.5	80	35.8	160	35	353	61.3	217	341			TT79#56	0	8.98693	0.915789	0.321199	16.9935	0.689655	83.2117	173.797	314.961	632.509	966.767	1372.55	2076.47	2413.39		0.01834	477
TT79#57	0.689	0.021	0.0808	0.0019	0.0619	0.0018		531	12	501	11	649	63		6.2	0.011	0.63	2.3	0.13	15.5	5.5	66.9	27.3	118	23.3	278	55.4	106	581			TT79#57	0	10.1307	0.115789	1.34904	15.0327	2.24138	75.4258	147.059	263.386	482.332	712.991	913.725	1635.29	2181.1		0.0665637	501
TT79#58	0.43	0.053	0.054	0.0026	0.058	0.0064		367	40	339	16	380	220		1.78		0.4	0.08	0.046	2.1	1.01	18.5	6.1	40.5	9.2	87	21	44.1	68.4			TT79#58	0	2.9085	0	0.856531	0.522876	0.793103	10.219	27.0053	72.8346	107.774	244.713	360.784	511.765	826.772		0.343105	339
TT79#59	0.602	0.035	0.0751	0.0039	0.0573	0.002		475	23	466	24	478	78		2.1	0.086	0.22	1.6	0.023	5.2	3.81	37.5	22.8	127	32.4	360	71	74	1870			TT79#59	0	3.43137	0.905263	0.471092	10.4575	0.396552	25.3041	101.872	147.638	402.827	767.372	1270.59	2117.65	2795.28		0.0243775	466
TT79#60	0.521	0.06	0.0688	0.0056	0.0571	0.0048		423	41	427	34	390	180		2			1.1	0.16	3.9	1.87	32.5	11.2	60.6	15	160	36.8	70	146			TT79#60	0	3.26797	0	0	7.18954	2.75862	18.9781	50	127.953	197.88	366.163	588.235	941.176	1448.82		0.236165	427
TT79#61	0.554	0.06	0.0717	0.0027	0.0558	0.0062		435	39	446	16	300	220		2.3		0.36	0.4	0.15	6.3	3.4	38.3	13	73	17	162	30.5	39.5	67.6			TT79#61	0	3.75817	0	0.770878	2.61438	2.58621	30.6569	90.9091	150.787	229.682	441.088	666.667	952.941	1200.79		0.288878	446
TT79#62	0.564	0.061	0.061	0.0035	0.0689	0.0074		442	39	381	21	680	230		2.3		0.18	1.01		5.4	2.02	32.2	17.2	79	16.6	185	38.3	57	115			TT79#62	0	3.75817	0	0.385439	6.60131	0	26.2774	54.0107	126.772	303.887	477.341	650.98	1088.24	1507.87		0	381
TT79#63	0.524	0.035	0.0665	0.0025	0.0568	0.0037		423	23	415	15	430	140		6		0.82	2.3		17.2	7.2	83	29.3	141	30.8	273	59.2	200	354			TT79#63	0	9.80392	0	1.75589	15.0327	0	83.6983	192.513	326.772	517.668	851.964	1207.84	1605.88	2330.71		0	415
TT79#64	0.559	0.085	0.0666	0.004	0.0583	0.0088		426	54	415	24	350	290		1.82		0.06	0.77	0.032	8.6	2.17	32.8	16.1	76	19.4	172	37.5	34.4	53			TT79#64	0	2.97386	0	0.12848	5.03268	0.551724	41.8491	58.0214	129.134	284.452	459.215	760.784	1011.76	1476.38		0.0380171	415
TT79#65	0.613	0.038	0.0769	0.0017	0.0573	0.0035		480	24	477	10	430	130		4.1	0.013		2.07	0.019	13.3	5	53.1	24	116	25.8	247	50.7	162	260			TT79#65	0	6.69935	0.136842	0	13.5294	0.327586	64.7202	133.69	209.055	424.028	700.906	1011.76	1452.94	1996.06		0.0110705	477
TT79#66	0.588	0.027	0.0712	0.0017	0.0601	0.0027		468	17	443	10	563	95		3.4		0.5	1.5		9.4	4.25	63	25.2	134	33.6	341	73	170	633			TT79#66	0	5.55556	0	1.07066	9.80392	0	45.7421	113.636	248.031	445.23	809.668	1317.65	2005.88	2874.02		0	443
TT79#67	0.605	0.084	0.0696	0.0059	0.062	0.0075		455	54	432	35	530	270		1.23	0.02	0.33	0.45		6.7	2.61	44.9	20.2	92	21	212	47.4	53	68			TT79#67	0	2.0098	0.210526	0.706638	2.94118	0	32.6034	69.7861	176.772	356.89	555.891	823.529	1247.06	1866.14		0	432
TT79#68	0.665	0.05	0.0786	0.0033	0.0616	0.003		517	31	488	20	610	100		7		1	1.68		18.7	6.6	81	37.5	179	39.9	412	84.2	204	721			TT79#68	0	11.4379	0	2.14133	10.9804	0	90.9976	176.471	318.898	662.544	1081.57	1564.71	2423.53	3314.96		0	488
TT79#69	0.602	0.022	0.075	0.0016	0.0581	0.0021		477	14	466.2	9.7	504	80		5.7		0.6	1.21	0.025	8.3	6.1	70	30.4	139	35.8	352	65	238	617			TT79#69	0	9.31373	0	1.2848	7.9085	0.431034	40.3893	163.102	275.591	537.102	839.879	1403.92	2070.59	2559.06		0.0241175	466.2
TT79#70	0.634	0.057	0.076	0.0036	0.061	0.0053		491	36	472	21	530	190		3.8		1.08	4.1	0.34	23.1	10.4	100	42.2	199	40.1	371	80.7	116	105.7			TT79#70	0	6.20915	0	2.31263	26.7974	5.86207	112.409	278.075	393.701	745.583	1202.42	1572.55	2182.35	3177.17		0.106808	472
TT79#71	0.609	0.029	0.0759	0.0017	0.0578	0.0028		480	18	471.5	9.9	490	110		9.9		1.02	3.7	0.021	22.4	10	110	47.5	252	48.5	434	82	344	522			TT79#71	0	16.1765	0	2.18415	24.183	0.362069	109.002	267.38	433.071	839.223	1522.66	1901.96	2552.94	3228.35		0.00705209	471.5
TT79#72	0.354	0.044	0.0442	0.0017	0.0595	0.0077		299	32	279	11	350	260	0.03	8.5	0.106	0.8	2.14	0.025	8	3.54	39.8	10.9	62	14.4	162	34.2	149	118.9			TT79#72	0.126582	13.8889	1.11579	1.71306	13.9869	0.431034	38.9294	94.6524	156.693	192.58	374.622	564.706	952.941	1346.46		0.0184719	279
TT79#73	0.524	0.02	0.067	0.0019	0.0558	0.0019		427	13	418	11	431	79		3.2	0.016	0.1	0.71		7.7	4.96	65	29.8	138	36.9	399	93	147	1100			TT79#73	0	5.22876	0.168421	0.214133	4.64052	0	37.4696	132.62	255.906	526.502	833.837	1447.06	2347.06	3661.42		0	418
TT79#74	0.396	0.044	0.0557	0.0024	0.0518	0.0059		330	32	349	14	140	220		4.1		0.78	1.27	0.021	11.2	4.5	59	22.3	111	21.3	208	42	87	89.9			TT79#74	0	6.69935	0	1.67024	8.30065	0.362069	54.5012	120.321	232.283	393.993	670.695	835.294	1223.53	1653.54		0.0170228	349
TT79#75	0.637	0.069	0.0752	0.0035	0.0638	0.0081		485	44	467	21	490	250		2.7		0.38	1.02	0.017	4.9	3.64	46.1	21.4	98	24.1	215	53.8	67.7	75			TT79#75	0	4.41176	0	0.813704	6.66667	0.293103	23.8443	97.3262	181.496	378.092	592.145	945.098	1264.71	2118.11		0.0232474	467
TT79#76	0.554	0.048	0.0752	0.0025	0.055	0.0051		445	33	467	15	300	190		1.8			0.59		5.8	3.28	37.5	17.3	84	18.5	184	31.8	41.9	84.8			TT79#76	0	2.94118	0	0	3.85621	0	28.2238	87.7005	147.638	305.654	507.553	725.49	1082.35	1251.97		0	467
TT79#77	0.603	0.03	0.0752	0.0017	0.0579	0.0027		477	19	469	11	480	100		5.5	0.091	1.23	3.6	0.07	18.8	6.7	98	37	183	43.3	374	70.3	261	750			TT79#77	0	8.98693	0.957895	2.63383	23.5294	1.2069	91.4842	179.144	385.827	653.71	1105.74	1698.04	2200	2767.72		0.0260131	469
TT79#78	0.569	0.077	0.0684	0.0032	0.0602	0.008		447	50	426	19	410	260		2.3		0.54	0.83	0.029	7.9	2.44	32.9	13.2	70.4	15.5	160	35.2	55.5	54.5			TT79#78	0	3.75817	0	1.15632	5.42484	0.5	38.4428	65.2406	129.528	233.216	425.378	607.843	941.176	1385.83		0.0346233	426
TT79#79	0.591	0.026	0.0782	0.0016	0.055	0.0027		469	16	485.3	9.6	360	100		9.4	0.141	3.1	8.7	0.053	51	18.8	230	82	325	66.6	543	95	460	412			TT79#79	0	15.3595	1.48421	6.63812	56.8627	0.913793	248.175	502.674	905.512	1448.76	1963.75	2611.76	3194.12	3740.16		0.00769227	485.3
TT79#80	0.672	0.089	0.0694	0.0052	0.0675	0.0067		499	54	431	31	700	230		1.49		0.3	0.76		3.3	2.04	34.4	11.3	60.7	10.7	126	26.9	30.5	128			TT79#80	0	2.43464	0	0.642398	4.96732	0	16.0584	54.5455	135.433	199.647	366.767	419.608	741.176	1059.06		0	431
TT79#81	0.392	0.046	0.0496	0.0026	0.0582	0.0074		326	34	312	16	400	270		2.6			0.23		4.6	2.04	30.4	14.6	59.1	15.3	165	31	40.2	94			TT79#81	0	4.24837	0	0	1.50327	0	22.3844	54.5455	119.685	257.951	357.1	600	970.588	1220.47		0	312
TT79#82	0.474	0.065	0.0633	0.0031	0.057	0.0083		384	47	395	19	230	280		1.8					2	2.02	15.4	9.4	44.2	12.1	112	23.2	26.8	47.5			TT79#82	0	2.94118	0	0	0	0	9.73236	54.0107	60.6299	166.078	267.069	474.51	658.824	913.386		#DIV/0!	395
TT79#83	0.393	0.044	0.0505	0.0024	0.0551	0.0062		328	31	320	15	320	230		4.8	0.035		0.5		8.3	2.24	35.9	15.8	78	15.6	155	33.4	72.8	113			TT79#83	0	7.84314	0.368421	0	3.26797	0	40.3893	59.893	141.339	279.152	471.299	611.765	911.765	1314.96		0	320
TT79#84	0.688	0.063	0.0869	0.0071	0.0587	0.0029		521	36	535	41	500	110		2.4		0.08	0.58		4.2	2.96	40.3	16.5	108	30.8	270	59.3	81	603			TT79#84	0	3.92157	0	0.171306	3.79085	0	20.438	79.1444	158.661	291.519	652.568	1207.84	1588.24	2334.65		0	535
TT79#85	0.479	0.036	0.0636	0.0033	0.0552	0.0039		393	25	397	20	340	150		3.8			0.07		9.9	3.18	41.9	17.8	89	23.1	197	43.2	99	155			TT79#85	0	6.20915	0	0	0.457516	0	48.1752	85.0267	164.961	314.488	537.764	905.882	1158.82	1700.79		0	397
TT79#86	0.641	0.074	0.0769	0.003	0.0602	0.0069		485	47	477	18	420	240		1.9			1.71		7.6	2.06	38.3	16.2	72.3	17.6	149	31.8	52.4	64.6			TT79#86	0	3.10458	0	0	11.1765	0	36.983	55.0802	150.787	286.219	436.858	690.196	876.471	1251.97		0	477
TT79#87	0.463	0.018	0.0597	0.0016	0.0561	0.0018		385	13	373.6	9.7	443	74		4.6		0.52	0.52	0.019	11.7	5.03	67	33.8	182	43.9	385	87.7	229	990			TT79#87	0	7.51634	0	1.11349	3.39869	0.327586	56.9343	134.492	263.78	597.173	1099.7	1721.57	2264.71	3452.76		0.0235496	373.6
TT79#88	0.415	0.065	0.052	0.0033	0.059	0.0092		340	46	326	20	340	310	0.1	3.4	0.013		0.85	0.19	6.1	2.94	31.6	13.3	81	12.9	168	35.8	37.8	80			TT79#88	0.421941	5.55556	0.136842	0	5.55556	3.27586	29.6837	78.6096	124.409	234.982	489.426	505.882	988.235	1409.45		0.255096	326
TT79#89	0.513	0.03	0.0657	0.0018	0.0562	0.0032		417	20	410	11	400	120		5.3		0.3	1.7		14.1	5.5	65	26.5	132	28.9	261	55.8	165	329			TT79#89	0	8.66013	0	0.642398	11.1111	0	68.6131	147.059	255.906	468.198	797.583	1133.33	1535.29	2196.85		0	410
TT79#90	0.502	0.072	0.0639	0.0028	0.06	0.0087		413	55	399	17	390	300		2.5	0.015	1.32	0.56		3.7	2.04	31.3	13.4	61	14.6	140	29.9	37.4	49.5			TT79#90	0	4.08497	0.157895	2.82655	3.66013	0	18.0049	54.5455	123.228	236.749	368.58	572.549	823.529	1177.17		0	399
TT79#91	0.513	0.014	0.0659	0.0015	0.0562	0.0015		419.9	9.6	411.3	8.8	458	56	0.49	6.6	0.63	6.7	3.4	0.6	10.8	4.2	64	25.1	157	35.6	356	72	123	2490			TT79#91	2.06751	10.7843	6.63158	14.3469	22.2222	10.3448	52.5547	112.299	251.969	443.463	948.64	1396.08	2094.12	2834.65		0.302708	411.3
TT79#92	0.409	0.041	0.0541	0.0017	0.0548	0.0057		341	30	340	10	260	210		4	0.021	0.23	1.48		9.1	3.33	51.9	15.4	92	21.6	179	35.7	81.6	155			TT79#92	0	6.53595	0.221053	0.492505	9.6732	0	44.2822	89.0374	204.331	272.085	555.891	847.059	1052.94	1405.51		0	340
TT79#93	0.601	0.032	0.0778	0.0022	0.0559	0.0028		474	20	483	13	400	110		7.5		1.13	2.1		19.8	5.8	76	31.8	150	33.9	292	57.6	313	374			TT79#93	0	12.2549	0	2.4197	13.7255	0	96.3504	155.08	299.213	561.837	906.344	1329.41	1717.65	2267.72		0	483
TT79#94	0.464	0.042	0.0597	0.0029	0.0572	0.0052		385	28	373	18	420	180		2.6	0.013		0.17		3.1	2.97	37	12.2	66	19.1	152	39	75.6	136			TT79#94	0	4.24837	0.136842	0	1.11111	0	15.0852	79.4118	145.669	215.548	398.792	749.02	894.118	1535.43		0	373
TT79#95	0.588	0.035	0.0763	0.0018	0.0557	0.0034		470	24	474	11	390	140		7.2		1.03	2.8	0.12	21.3	5.4	81	34	186	42.1	355	72	318	313			TT79#95	0	11.7647	0	2.20557	18.3007	2.06897	103.65	144.385	318.898	600.707	1123.87	1650.98	2088.24	2834.65		0.0475046	474
TT79#96	0.363	0.042	0.0471	0.0029	0.0573	0.0069		309	32	296	18	360	260		2.9		0.43	0.75		7.5	2.52	51.4	15.7	85	22.4	223	46.6	104	208			TT79#96	0	4.73856	0	0.920771	4.90196	0	36.4964	67.3797	202.362	277.385	513.595	878.431	1311.76	1834.65		0	296
TT79#97	0.613	0.031	0.077	0.0015	0.0579	0.003		482	19	477.9	8.7	490	120		4.7		0.56	1.11	0.046	7.8	3.7	49.6	23.5	117	29.1	275	50.2	188	449			TT79#97	0	7.67974	0	1.19914	7.2549	0.793103	37.9562	98.9305	195.276	415.194	706.949	1141.18	1617.65	1976.38		0.0477939	477.9
TT79#98	1.57	0.11	0.131	0.0071	0.0852	0.0026		940	46	792	41	1311	59		4.8		1.9	3.2	0.31	20.9	7.6	121	48.4	252	58.2	487	111	97	475			TT79#98	0	7.84314	0	4.06852	20.915	5.34483	101.703	203.209	476.378	855.124	1522.66	2282.35	2864.71	4370.08		0.115888	792
TT79#99	0.728	0.028	0.0901	0.0021	0.0582	0.0018		553	17	556	12	513	70		0.16					0.67	1.04	14.6	10	64.2	16.9	206	49.4	43.7	839			TT79#99	0	0.261438	0	0	0	0	3.26034	27.8075	57.4803	176.678	387.915	662.745	1211.76	1944.88		#DIV/0!	556
TT79#100	0.84	0.042	0.0996	0.0037	0.0617	0.0023		619	24	612	22	629	82		1.39		0.43	2.5	0.17	18.6	7.5	70	30.5	143	33.3	315	70.6	71.2	396			TT79#100	0	2.27124	0	0.920771	16.3399	2.93103	90.5109	200.535	275.591	538.869	864.048	1305.88	1852.94	2779.53		0.076216	612
TT79#101	0.774	0.06	0.0874	0.0035	0.0632	0.0035		573	34	540	21	650	120		7.7		0.62	3.4	0.27	21.1	11.2	125	46.9	241	48.8	453	84.2	153	317			TT79#101	0	12.5817	0	1.32762	22.2222	4.65517	102.676	299.465	492.126	828.622	1456.19	1913.73	2664.71	3314.96		0.0974556	540
TT79#102	0.548	0.029	0.0684	0.002	0.0575	0.0028		441	19	426	12	500	100		4		0.42	0.72	0.021	7	3.3	47	22.7	110	23.9	222	58.7	103	637			TT79#102	0	6.53595	0	0.899358	4.70588	0.362069	34.0633	88.2353	185.039	401.06	664.653	937.255	1305.88	2311.02		0.0285975	426
TT79#103	1.56	0.16	0.1318	0.0097	0.0833	0.0031		924	60	794	55	1246	73		6		0.08	0.57	0.046	5	2.54	27	11.1	60	13.4	137	33.4	142	450			TT79#103	0	9.80392	0	0.171306	3.72549	0.793103	24.3309	67.9144	106.299	196.113	362.538	525.49	805.882	1314.96		0.0833027	794
TT79#104	0.585	0.059	0.0727	0.0022	0.0576	0.0054		458	34	452	13	380	170		1.58	0.011		1.02	0.061	9.4	3.66	40.7	22.6	109	21	249	43.8	85	151			TT79#104	0	2.5817	0.115789	0	6.66667	1.05172	45.7421	97.861	160.236	399.293	658.61	823.529	1464.71	1724.41		0.0602268	452
TT79#105	0.527	0.046	0.0689	0.0021	0.0563	0.0048		427	32	430	13	350	170		1.78		0.18	1.15		3.4	3.14	36.5	12.9	73	17.5	174	30.9	64.9	96			TT79#105	0	2.9085	0	0.385439	7.51634	0	16.545	83.9572	143.701	227.915	441.088	686.275	1023.53	1216.54		0	430
TT79#106	0.521	0.029	0.0665	0.0023	0.0565	0.0026		423	20	414	14	430	100		3.8		0.31	1.06	0.025	11.7	5.9	61	24.8	139	33.8	282	61.6	249	536			TT79#106	0	6.20915	0	0.663812	6.9281	0.431034	56.9343	157.754	240.157	438.163	839.879	1325.49	1658.82	2425.2		0.0217029	414
TT79#107	0.468	0.035	0.0643	0.0016	0.053	0.0042		385	24	401.9	9.9	240	160		3.7		0.64	2.8		15.9	6.9	81	29.5	145	32.1	255	56.7	151	194			TT79#107	0	6.04575	0	1.37045	18.3007	0	77.3723	184.492	318.898	521.201	876.133	1258.82	1500	2232.28		0	401.9
TT79#108	0.485	0.037	0.0644	0.0021	0.0553	0.0047		396	26	402	13	310	170		1.21		0.4			3.5	1.42	19.1	8.9	43.5	9.4	110	28.6	72.9	119			TT79#108	0	1.97712	0	0.856531	0	0	17.0316	37.9679	75.1969	157.244	262.84	368.627	647.059	1125.98		#DIV/0!	402
TT79#109	0.48	0.043	0.06	0.0024	0.0583	0.0048		392	29	375	15	440	180		3.4		0.58	1.91	0.072	8.5	4.7	47	19.2	89	18.4	187	42.1	84	167			TT79#109	0	5.55556	0	1.24197	12.4837	1.24138	41.3625	125.668	185.039	339.223	537.764	721.569	1100	1657.48		0.0546298	375
TT79#110	0.45	0.022	0.0592	0.0014	0.0544	0.0019		375	15	370.6	8.5	361	75		5.3		0.24	0.87		10	3.15	30.5	18.7	94	30.9	295	62.5	141	1130			TT79#110	0	8.66013	0	0.513919	5.68627	0	48.6618	84.2246	120.079	330.389	567.976	1211.76	1735.29	2460.63		0	370.6
TT79#111	0.617	0.025	0.0713	0.0014	0.0619	0.002		486	15	444.1	8.6	655	75	0.022	6.9	0.06	1.36	1.07	0.25	15.1	5.18	63	28.5	144	34	345	78	232	665			TT79#111	0.092827	11.2745	0.631579	2.91221	6.99346	4.31034	73.4793	138.503	248.031	503.534	870.091	1333.33	2029.41	3070.87		0.190144	444.1
TT95#01	0.649	0.02	0.0826	0.0017	0.057	0.0014		507	12	511.4	9.9	473	55	0.019	11.1	0.095	1.61	6.7	0.18	39.3	12.7	139	59	246	55.5	551	106	360	1430			TT95#01	0.0801688	18.1373	1	3.44754	43.7908	3.10345	191.241	339.572	547.244	1042.4	1486.4	2176.47	3241.18	4173.23		0.0339127	511.4
TT95#02	0.251	0.016	0.03587	0.00077	0.0507	0.0034		226	13	227.1	4.8	200	140		15.6	0.018	0.62	3.8	2.21	29.5	10.9	142	49	220	48.7	463	90.4	139	369			TT95#02	0	25.4902	0.189474	1.32762	24.8366	38.1034	143.552	291.444	559.055	865.724	1329.31	1909.8	2723.53	3559.06		0.638136	227.1
TT95#03	0.253	0.011	0.0349	0.001	0.0525	0.0022		228.5	8.8	221.2	6.3	279	90	26.9	261	34.6	201	125	26.7	232	61	510	126	442	112	1010	195	1480	1630			TT95#03	113.502	426.471	364.211	430.407	816.993	460.345	1128.95	1631.02	2007.87	2226.15	2670.69	4392.16	5941.18	7677.17		0.479331	221.2
TT95#04	4.01	0.15	0.2937	0.007	0.0983	0.0028		1629	31	1659	35	1576	55		39.8	0.013	2.6	5.7	0.37	26.2	13.3	166	64.8	285	61.7	608	109	189	253			TT95#04	0	65.0327	0.136842	5.56745	37.2549	6.37931	127.494	355.615	653.543	1144.88	1722.05	2419.61	3576.47	4291.34		0.092563	1659
TT95#05	2.9	0.16	0.224	0.01	0.0932	0.0018		1367	43	1301	55	1483	37		9.7	0.024	1.71	2.9	0.15	32.1	9.8	152	53	230	50.1	544	94.3	157	547			TT95#05	0	15.8497	0.252632	3.66167	18.9542	2.58621	156.204	262.032	598.425	936.396	1389.73	1964.71	3200	3712.6		0.0475295	1301
TT95#06	1.48	0.11	0.1566	0.0093	0.0683	0.0023		909	42	934	51	853	70		4.8	0.006	1.47	2.6	0.31	27.2	11	103	49.4	213	43.5	447	87.8	61.4	503			TT95#06	0	7.84314	0.0631579	3.14775	16.9935	5.34483	132.36	294.118	405.512	872.792	1287.01	1705.88	2629.41	3456.69		0.112697	934
TT95#07	1.739	0.054	0.1727	0.0045	0.0733	0.0017		1023	21	1026	24	1010	46		22.9	0.3	3.1	5.8	0.72	40.9	14.7	163	62.5	291	53.8	565	110	208	531			TT95#07	0	37.4183	3.15789	6.63812	37.9085	12.4138	199.027	393.048	641.732	1104.24	1758.31	2109.8	3323.53	4330.71		0.142916	1026
TT95#08	0.33	0.025	0.0446	0.0023	0.0538	0.0037		287	19	281	14	350	160		32.3		0.42	1.94	1.32	11.6	5	72	36.2	150	36.2	423	76.7	101	415			TT95#08	0	52.7778	0	0.899358	12.6797	22.7586	56.4477	133.69	283.465	639.576	906.344	1419.61	2488.24	3019.69		0.850683	281
TT95#09	0.661	0.035	0.0872	0.0038	0.0549	0.0022		518	23	539	22	408	96	0.014	4.4	0.053	1.12	1.01	0.097	10.3	5.26	61	27.7	153	37.7	443	84	54.4	549			TT95#09	0.0590717	7.18954	0.557895	2.39829	6.60131	1.67241	50.1217	140.642	240.157	489.399	924.471	1478.43	2605.88	3307.09		0.0919424	539
TT95#10	0.273	0.017	0.0404	0.0013	0.0491	0.0028		244	13	255.4	8	120	120		12.6	0.083	1.25	3.2	0.6	25.4	7.6	86	44.7	198	47	494	102	215	507			TT95#10	0	20.5882	0.873684	2.67666	20.915	10.3448	123.601	203.209	338.583	789.753	1196.37	1843.14	2905.88	4015.75		0.203462	255.4
TT95#11	1.862	0.093	0.1777	0.0084	0.0764	0.0018		1070	35	1052	47	1092	48		2.7		0.2	0.39	0.12	4.1	2.15	39.1	23.5	127	37.9	390	94	60.7	944			TT95#11	0	4.41176	0	0.428266	2.54902	2.06897	19.9513	57.4866	153.937	415.194	767.372	1486.27	2294.12	3700.79		0.290122	1052
TT95#12	0.564	0.025	0.0715	0.0032	0.0573	0.0013		452	17	445	19	488	51	31.9	215	30	165	85	16.1	102	21.3	200	68	369	84	950	171	326	2070			TT95#12	134.599	351.307	315.789	353.319	555.556	277.586	496.35	569.519	787.402	1201.41	2229.61	3294.12	5588.24	6732.28		0.528616	445
TT95#13	0.298	0.025	0.0402	0.0018	0.0531	0.0035		262	20	254	11	280	140		10.5	0.079	1.56	5.1	0.5	27.9	13.8	184	68	278	59.5	585	119	174	484			TT95#13	0	17.1569	0.831579	3.34047	33.3333	8.62069	135.766	368.984	724.409	1201.41	1679.76	2333.33	3441.18	4685.04		0.128146	254
TT95#14	1.029	0.044	0.1173	0.0041	0.0632	0.0017		715	22	714	24	706	59	0.22	1.51	0.043	0.63	0.75	0.25	3.8	2.91	27.5	12.9	76	23.1	280	58	41.2	805			TT95#14	0.92827	2.46732	0.452632	1.34904	4.90196	4.31034	18.4915	77.8075	108.268	227.915	459.215	905.882	1647.06	2283.46		0.452732	714
TT95#15	1.957	0.088	0.1882	0.007	0.0752	0.002		1093	31	1110	38	1057	52		4.1	0.14	4.9	9.2	0.43	57.8	19.2	202	65	291	61.3	565	105	183	537			TT95#15	0	6.69935	1.47368	10.4925	60.1307	7.41379	281.265	513.369	795.276	1148.41	1758.31	2403.92	3323.53	4133.86		0.0570078	1110
TT95#16	0.281	0.01	0.0397	0.0012	0.0515	0.0019		250.5	8.2	250.9	7.6	242	84	1.6	34.5	2.54	13.3	11.4	0.87	47.1	14.3	204	80	375	87	853	181	430	1250			TT95#16	6.75105	56.3725	26.7368	28.4797	74.5098	15	229.197	382.353	803.15	1413.43	2265.86	3411.76	5017.65	7125.98		0.114784	250.9
TT95#17	1.92	0.14	0.181	0.01	0.0758	0.002		1068	51	1068	57	1072	54		21.4	0.011	0.88	2.3	0.11	20.8	6.9	123	51	278	72	817	201	122	775			TT95#17	0	34.9673	0.115789	1.88437	15.0327	1.89655	101.217	184.492	484.252	901.06	1679.76	2823.53	4805.88	7913.39		0.0486206	1068
TT95#18	0.665	0.025	0.0848	0.002	0.0568	0.0019		516	15	525	12	454	75	1.06	16.8	0.26	2.2	1.73	0.17	14.1	4.54	63	25.4	97	29	308	63	274	610			TT95#18	4.47257	27.451	2.73684	4.71092	11.3072	2.93103	68.6131	121.39	248.031	448.763	586.103	1137.25	1811.76	2480.31		0.10523	525
TT95#19	0.283	0.04	0.0408	0.0019	0.0513	0.0077		250	32	257	12	80	270		5.1		0.39	1.14	0.35	12.2	4.04	41.3	16.4	61.5	12.7	140	29.2	33.5	79.6			TT95#19	0	8.33333	0	0.835118	7.45098	6.03448	59.3674	108.021	162.598	289.753	371.601	498.039	823.529	1149.61		0.286919	257
TT95#20	0.805	0.046	0.0951	0.0033	0.0611	0.0025		594	25	585	20	604	91	0.079	15.2	0.04	0.75	2.07	0.45	11.2	4.5	42	20.8	79	15.2	147	30.4	151	593			TT95#20	0.333333	24.8366	0.421053	1.606	13.5294	7.75862	54.5012	120.321	165.354	367.491	477.341	596.078	864.706	1196.85		0.285721	585
TT95#21	1.835	0.078	0.1767	0.0064	0.0751	0.0019		1051	29	1047	35	1067	48	0.023	11.9	0.028	0.92	4.7	0.099	32.3	13.4	191	72	367	99	820	167	106	556			TT95#21	0.0970464	19.4444	0.294737	1.97002	30.719	1.7069	157.178	358.289	751.969	1272.08	2217.52	3882.35	4823.53	6574.8		0.0245645	1047
TT95#22	1.439	0.049	0.1526	0.0039	0.0682	0.0015		902	20	915	22	870	45	4.1	19.4	3.6	19.4	14.6	1.99	35	17.2	249	97	420	107	1180	211	222	1280			TT95#22	17.2996	31.6993	37.8947	41.5418	95.4248	34.3103	170.316	459.893	980.315	1713.78	2537.76	4196.08	6941.18	8307.09		0.269133	915
TT95#23	0.28	0.017	0.0414	0.0013	0.0496	0.003		254	14	261.4	7.8	140	130	4.1	18.2	1.01	8.3	5.2	0.22	35	12.3	169	69.3	303	62	620	124	226	438			TT95#23	17.2996	29.7386	10.6316	17.773	33.9869	3.7931	170.316	328.877	665.354	1224.38	1830.82	2431.37	3647.06	4881.89		0.0498552	261.4
TT95#24	0.292	0.011	0.0408	0.001	0.052	0.0018		259.7	8.5	257.7	6.2	264	76	1.61	15	2.3	14.1	12.5	2.61	44	13.9	144	50.6	219	54.3	579	124	356	1640			TT95#24	6.79325	24.5098	24.2105	30.1927	81.6993	45	214.112	371.658	566.929	893.993	1323.26	2129.41	3405.88	4881.89		0.340238	257.7
TT95#25	0.329	0.017	0.0448	0.0014	0.0538	0.0023		288	13	282.2	8.4	326	94	0.12	37.4	0.067	1.43	5.2	0.45	32.1	14.3	179	76	384	94	1050	251	488	840			TT95#25	0.506329	61.1111	0.705263	3.0621	33.9869	7.75862	156.204	382.353	704.724	1342.76	2320.24	3686.27	6176.47	9881.89		0.106483	282.2
TT95#26	0.245	0.014	0.0353	0.0011	0.0505	0.003		222	11	223.8	6.6	180	120	0.038	12	0.077	3.2	8.5	0.052	33.2	14.1	177	57.8	234	49.5	474	92	229	584			TT95#26	0.160338	19.6078	0.810526	6.85225	55.5556	0.896552	161.557	377.005	696.85	1021.2	1413.9	1941.18	2788.24	3622.05		0.00946343	223.8
TT95#27	0.305	0.023	0.043	0.0016	0.052	0.0041		267	18	271.3	9.7	210	160	5.4	18.6	2.01	9.6	8.9	0.48	31.6	11.3	128	45.4	191	43.6	355	74	237	405			TT95#27	22.7848	30.3922	21.1579	20.5567	58.1699	8.27586	153.771	302.139	503.937	802.12	1154.08	1709.8	2088.24	2913.39		0.0875037	271.3
TT95#28	0.567	0.027	0.0727	0.0024	0.0564	0.002		454	17	452	15	437	79		1.8	0.02	1.27	1.51	0.051	6.7	4.16	71	29.8	178	40.7	460	101	91	1022			TT95#28	0	2.94118	0.210526	2.71949	9.86928	0.87931	32.6034	111.23	279.528	526.502	1075.53	1596.08	2705.88	3976.38		0.0490194	452
TT95#29	0.674	0.029	0.0863	0.0025	0.0567	0.0022		520	18	533	15	466	80	2.6	27.1	0.69	4.2	3.2	0.66	15.9	6.6	93	36.5	213	49.2	536	128	477	697			TT95#29	10.9705	44.281	7.26316	8.99358	20.915	11.3793	77.3723	176.471	366.142	644.876	1287.01	1929.41	3152.94	5039.37		0.282875	533
TT95#30	0.235	0.033	0.0325	0.0018	0.0526	0.0063		213	27	206	11	250	250	2.7	24.7	0.78	5.7	8.3	0.37	34.2	13.2	152	53.1	233	54	496	100	172	298			TT95#30	11.3924	40.3595	8.21053	12.2056	54.2484	6.37931	166.423	352.941	598.425	938.163	1407.85	2117.65	2917.65	3937.01		0.0671388	206
TT95#31	0.321	0.019	0.0453	0.0022	0.0516	0.0022		281	14	285	14	242	92	4.6	34.2	4.7	23.9	18.7	2.37	43	14.3	191	80	309	68.3	714	135	214	1180			TT95#31	19.4093	55.8824	49.4737	51.1777	122.222	40.8621	209.246	382.353	751.969	1413.43	1867.07	2678.43	4200	5314.96		0.255515	285
TT95#32	0.649	0.019	0.0833	0.002	0.0561	0.0012		507	12	516	12	453	51		32.3	0.053	2.4	7.2	0.77	38.5	14.5	171	63.9	264	63.4	572	112	815	2000			TT95#32	0	52.7778	0.557895	5.13919	47.0588	13.2759	187.348	387.701	673.228	1128.98	1595.17	2486.27	3364.71	4409.45		0.14139	516
TT95#33	1.38	0.044	0.1495	0.0027	0.0673	0.0023		878	19	898	15	832	69		1.39		0.83	4	0.015	35.6	13	159	50	197	39.9	380	81	71.7	323			TT95#33	0	2.27124	0	1.7773	26.1438	0.258621	173.236	347.594	625.984	883.392	1190.33	1564.71	2235.29	3188.98		0.00384291	898
TT95#34	1.553	0.056	0.1558	0.004	0.0719	0.0021		948	23	933	23	968	60		0.29	0.011	1.04	5.7	0.29	60	22.1	292	95	331	74	700	123	78	665			TT95#34	0	0.473856	0.115789	2.22698	37.2549	5	291.971	590.909	1149.61	1678.45	2000	2901.96	4117.65	4842.52		0.0479412	933
TT95#35	1.632	0.083	0.1656	0.0059	0.0713	0.0033		975	31	986	33	920	100		1.1	0.067	1.9	6.1	0.34	51.5	20.3	294	96	426	82	749	137	67	254			TT95#35	0	1.79739	0.705263	4.06852	39.8693	5.86207	250.608	542.781	1157.48	1696.11	2574.02	3215.69	4405.88	5393.7		0.0586454	986
TT95#36	4.38	0.29	0.219	0.011	0.1429	0.0048		1683	59	1273	57	2243	58	0.13	12.1	0.31	5	6.8	2.63	30.9	10.3	113	35	161	36.7	449	88	108	290			TT95#36	0.548523	19.7712	3.26316	10.7066	44.4444	45.3448	150.365	275.401	444.882	618.375	972.81	1439.22	2641.18	3464.57		0.554684	1273
TT95#37	1.088	0.047	0.1246	0.0032	0.063	0.0021		744	22	757	18	681	72		0.32			1.4	0.123	17.5	6.3	62	13.4	40.4	7.8	50	8.5	7.2	582			TT95#37	0	0.522876	0	0	9.15033	2.12069	85.1582	168.449	244.094	236.749	244.109	305.882	294.118	334.646		0.0759706	757
TT95#38	0.258	0.02	0.038	0.0012	0.0492	0.0039		231	15	240.6	7.4	90	150		14.3		0.12	3.1	0.69	16.5	5.9	82	34.6	160	39	360	80	85	451			TT95#38	0	23.366	0	0.256959	20.2614	11.8966	80.292	157.754	322.835	611.307	966.767	1529.41	2117.65	3149.61		0.294951	240.6
TT95#39	0.603	0.036	0.0776	0.0026	0.0564	0.003		475	23	481	15	440	100		4.7	0.133	4.3	9.8	0.31	50	19.9	246	93	348	82	800	155	176	502			TT95#39	0	7.67974	1.4	9.20771	64.0523	5.34483	243.309	532.086	968.504	1643.11	2102.72	3215.69	4705.88	6102.36		0.0428141	481
TT95#40	0.329	0.026	0.0448	0.0018	0.0529	0.004		286	20	283	11	280	160		21.5	0.012	0.39	1.71	0.7	6.9	3.5	56	20.5	106	28.5	303	69.3	220	349			TT95#40	0	35.1307	0.126316	0.835118	11.1765	12.069	33.5766	93.5829	220.472	362.191	640.483	1117.65	1782.35	2728.35		0.623016	283
TT95#41	0.557	0.043	0.0717	0.003	0.0567	0.004		443	27	446	18	400	150		7.7	0.16	2.17	5.9	0.56	25.9	7.6	125	50.7	215	44.1	440	101	101	291			TT95#41	0	12.5817	1.68421	4.64668	38.5621	9.65517	126.034	203.209	492.126	895.76	1299.09	1729.41	2588.24	3976.38		0.138496	446
TT95#42	0.298	0.016	0.0433	0.0012	0.0499	0.0025		264	13	273.1	7.5	180	110	0.21	22.2	0.26	4.5	4.8	0.51	21.8	8.3	85	39.2	187	43.7	468	109	550	1010			TT95#42	0.886076	36.2745	2.73684	9.63597	31.3725	8.7931	106.083	221.925	334.646	692.58	1129.91	1713.73	2752.94	4291.34		0.152421	273.1
TT95#43	1.069	0.035	0.1231	0.0033	0.0633	0.0016		739	18	748	19	700	56				0.16	0.58		16.1	7	71	18.5	41	8.7	60	8.8	5.5	819			TT95#43	0	0	0	0.342612	3.79085	0	78.3455	187.166	279.528	326.855	247.734	341.176	352.941	346.457		0	748
TT95#44	3.85	0.25	0.285	0.011	0.0972	0.0043		1583	49	1613	54	1533	84	0.033	8.3	0.42	9.2	10.9	2.09	59	15.7	183	65	240	53.8	408	83	61.1	86.6			TT95#44	0.139241	13.5621	4.42105	19.7002	71.2418	36.0345	287.105	419.786	720.472	1148.41	1450.15	2109.8	2400	3267.72		0.251959	1613
TT95#45	0.528	0.034	0.0688	0.0033	0.0555	0.0024		427	23	429	20	394	92	0.25	5.2	0.42	2.9	6.4	0.052	24.3	9	85	35.7	174	42.2	380	78	234	563			TT95#45	1.05485	8.49673	4.42105	6.20985	41.8301	0.896552	118.248	240.642	334.646	630.742	1051.36	1654.9	2235.29	3070.87		0.0127478	429
TT95#46	0.113	0.012	0.01629	0.00045	0.05	0.0055		108	11	104.1	2.8	90	210	0.15	8	0.066	1.38	2.3	0.26	22.6	5.6	74	34.4	146	29.5	304	75	193	645			TT95#46	0.632911	13.0719	0.694737	2.95503	15.0327	4.48276	109.976	149.733	291.339	607.774	882.175	1156.86	1788.24	2952.76		0.11025	104.1
TT95#47	0.235	0.017	0.0356	0.0011	0.0485	0.0038		213	14	225.5	7	70	150		14	0.082	2.4	5.6	0.15	25.9	15.9	207	69	314	71	627	136	276	516			TT95#47	0	22.8758	0.863158	5.13919	36.6013	2.58621	126.034	425.134	814.961	1219.08	1897.28	2784.31	3688.24	5354.33		0.0380777	225.5
TT95#48	1.86	0.14	0.1683	0.0095	0.0788	0.0027		1046	50	999	52	1141	70	0.32	15.6	0.4	3.6	6	0.023	37	15.8	220	97	440	94	790	166	141	920			TT95#48	1.35021	25.4902	4.21053	7.70878	39.2157	0.396552	180.049	422.46	866.142	1713.78	2658.61	3686.27	4647.06	6535.43		0.00471927	999
TT95#49	0.274	0.029	0.0412	0.0013	0.0486	0.0051		241	23	260	7.9	50	200		21.1		0.4	1.4		3.5	5.3	48	31	124	33.2	288	62	190	527			TT95#49	0	34.4771	0	0.856531	9.15033	0	17.0316	141.711	188.976	547.703	749.245	1301.96	1694.12	2440.94		0	260
TT95#50	0.248	0.028	0.0361	0.0017	0.0512	0.006		221	22	228	10	150	230		3.9	0.041	2.2	8.1	0.12	31	12.9	186	67	290	75	610	134	115	330			TT95#50	0	6.37255	0.431579	4.71092	52.9412	2.06897	150.852	344.92	732.283	1183.75	1752.27	2941.18	3588.24	5275.59		0.0231516	228
TT95#51	0.874	0.075	0.0898	0.0063	0.0698	0.0025		624	40	552	37	907	73	6.4	35.6	1.33	12.1	4.6	1.25	28	10.9	147	77	504	156	1360	355	166	1150			TT95#51	27.0042	58.1699	14	25.9101	30.0654	21.5517	136.253	291.444	578.74	1360.42	3045.32	6117.65	8000	13976.4		0.336725	552
TT95#52	0.488	0.045	0.0689	0.0034	0.053	0.0047		396	31	429	21	240	180		5.7		1.4	2.3	1.1	33	8.1	89	39.5	233	57	422	104	122	322			TT95#52	0	9.31373	0	2.99786	15.0327	18.9655	160.584	216.578	350.394	697.88	1407.85	2235.29	2482.35	4094.49		0.386007	429
TT95#53	0.281	0.026	0.039	0.0013	0.0526	0.0047		248	20	246.6	8	210	180		6.9	0.056	5.2	8.2	1.11	46	14.1	179	58	244	65	519	133	194	444			TT95#53	0	11.2745	0.589474	11.1349	53.5948	19.1379	223.844	377.005	704.724	1024.73	1474.32	2549.02	3052.94	5236.22		0.174727	246.6
TT95#54	0.389	0.026	0.0517	0.0015	0.0549	0.0038		330	19	324.5	9	330	150		66		0.41	4	0.46	22.2	8.9	129	70	381	87	900	216	276	650			TT95#54	0	107.843	0	0.877944	26.1438	7.93103	108.029	237.968	507.874	1236.75	2302.11	3411.76	5294.12	8503.94		0.149236	324.5
TT95#55	0.372	0.028	0.0528	0.0033	0.0535	0.0032		318	20	331	20	300	130	6.7	34.7	5.6	24.6	14.3	2.6	32.3	8.8	110	50.6	308	93	840	187	103	660			TT95#55	28.27	56.6993	58.9474	52.6767	93.4641	44.8276	157.178	235.294	433.071	893.993	1861.03	3647.06	4941.18	7362.2		0.369852	331
TT95#56	0.606	0.029	0.0792	0.002	0.0557	0.0024		481	19	491	12	404	93		1.2		0.21	1.2		18.1	8.6	114	51	287	84	740	209	66	890			TT95#56	0	1.96078	0	0.449679	7.84314	0	88.0779	229.947	448.819	901.06	1734.14	3294.12	4352.94	8228.35		0	491
TT95#57	1.41	0.058	0.1461	0.0044	0.0697	0.002		888	24	878	25	900	61		5.5			0.89	0.5	12.8	4.9	79	38	171	47.7	560	128	62	860			TT95#57	0	8.98693	0	0	5.81699	8.62069	62.2871	131.016	311.024	671.378	1033.23	1870.59	3294.12	5039.37		0.452891	878
TT95#58	0.5	0.031	0.0659	0.0028	0.0545	0.0027		408	21	411	17	360	110	0.26	11.7	0.33	5.3	7.4	0.11	44	13.7	170	80	405	99	940	230	294	960			TT95#58	1.09705	19.1176	3.47368	11.349	48.366	1.89655	214.112	366.31	669.291	1413.43	2447.13	3882.35	5529.41	9055.12		0.0186369	411
TT95#59	0.653	0.05	0.0808	0.003	0.0593	0.0048		503	31	500	18	470	170		9.5		0.71	0.89	0.52	10.4	4.8	66	22.5	110	27.3	232	68	99	214			TT95#59	0	15.5229	0	1.52034	5.81699	8.96552	50.6083	128.342	259.843	397.527	664.653	1070.59	1364.71	2677.17		0.522535	500
TT95#60	0.292	0.012	0.0418	0.0011	0.0507	0.0022		259	9.7	263.8	6.9	202	92	0.37	19.6	0.47	5.3	6.3	0.59	40.2	17.8	204	90	399	103	920	204	710	2110			TT95#60	1.56118	32.0261	4.94737	11.349	41.1765	10.1724	195.62	475.936	803.15	1590.11	2410.88	4039.22	5411.76	8031.5		0.113342	263.8
TT95#61	0.304	0.015	0.042	0.0011	0.052	0.0024		269	12	265.5	6.6	270	100	6	31	2.8	14.5	7	0.22	44.1	13.5	157	69	262	65.4	522	100	253	693			TT95#61	25.3165	50.6536	29.4737	31.0493	45.7516	3.7931	214.599	360.963	618.11	1219.08	1583.08	2564.71	3070.59	3937.01		0.0382805	265.5
TT95#62	2.25	0.23	0.186	0.015	0.0844	0.003		1150	77	1092	85	1287	74	0.15	23.4	0.48	1.45	1.9	0.54	16.1	7.8	91	34.6	161	37.6	444	98	184	398			TT95#62	0.632911	38.2353	5.05263	3.10493	12.4183	9.31034	78.3455	208.556	358.268	611.307	972.81	1474.51	2611.76	3858.27		0.298489	1092
TT95#63	0.307	0.027	0.0424	0.0013	0.0529	0.0045		272	22	267.4	8.1	240	170		3.8			0.97		10.1	4.9	74	25.5	119	33.9	287	71	116	490			TT95#63	0	6.20915	0	0	6.33987	0	49.1484	131.016	291.339	450.53	719.033	1329.41	1688.24	2795.28		0	267.4
TT95#64	0.659	0.045	0.0829	0.0025	0.0577	0.0038		508	27	513	15	440	140		19.7	0.27	3.1	8.8	1.86	52	13.5	159	53	186	49	368	78	170	254			TT95#64	0	32.1895	2.84211	6.63812	57.5163	32.069	253.041	360.963	625.984	936.396	1123.87	1921.57	2164.71	3070.87		0.265824	513
TT95#65	0.289	0.018	0.04091	0.00095	0.0511	0.003		256	14	258.4	5.9	200	120		40	0.022	0.77	5.3	1.98	25.6	9.6	98	43.4	191	53.6	557	126	394	754			TT95#65	0	65.3595	0.231579	1.64882	34.6405	34.1379	124.574	256.684	385.827	766.784	1154.08	2101.96	3276.47	4960.63		0.519674	258.4
TT95#66	0.714	0.033	0.0891	0.0024	0.0581	0.0024		544	19	550	14	496	88	5.6	12.4	1.83	7.7	3.8	0.026	33	10.6	141	64	274	60	529	105	177	940			TT95#66	23.6287	20.2614	19.2632	16.4882	24.8366	0.448276	160.584	283.422	555.118	1130.74	1655.59	2352.94	3111.76	4133.86		0.0070982	550
TT95#67	0.275	0.023	0.0387	0.0018	0.0528	0.0045		247	19	244	11	230	170	6.9	64	2.4	9.4	9.9	0.63	46	20.5	303	109	480	104	870	180	590	840			TT95#67	29.1139	104.575	25.2632	20.1285	64.7059	10.8621	223.844	548.128	1192.91	1925.8	2900.3	4078.43	5117.65	7086.61		0.0902543	244
TT95#68	0.271	0.025	0.0386	0.0019	0.0519	0.0042		240	20	244	12	230	170	7.3	52	6.8	29.1	20.5	4.8	45	14.9	182	78	412	131	1210	232	171	750			TT95#68	30.8017	84.9673	71.5789	62.3126	133.987	82.7586	218.978	398.396	716.535	1378.09	2489.43	5137.25	7117.65	9133.86		0.48315	244
TT95#69	0.684	0.04	0.0862	0.0021	0.0579	0.0035		524	24	533	12	460	130		8.3	0.15	2.1	5.7	1.6	53	15.7	191	72	330	73	590	125	170	428			TT95#69	0	13.5621	1.57895	4.49679	37.2549	27.5862	257.908	419.786	751.969	1272.08	1993.96	2862.75	3470.59	4921.26		0.281429	533
TT95#70	3.96	0.11	0.2845	0.0071	0.1004	0.0016		1621	23	1612	36	1627	29	0.029	29	1.57	20.1	32.9	3.43	131	39.5	383	144	596	118	1020	198	1310	1080			TT95#70	0.122363	47.3856	16.5263	43.0407	215.033	59.1379	637.47	1056.15	1507.87	2544.17	3601.21	4627.45	6000	7795.28		0.159729	1612
TT95#71	0.61	0.029	0.0742	0.0026	0.0594	0.0018		481	19	461	15	557	69	4.8	53	6.8	35.8	29.5	5.7	51	16.8	156	49	268	53	590	131	206	1340			TT95#71	20.2532	86.6013	71.5789	76.6595	192.81	98.2759	248.175	449.198	614.173	865.724	1619.34	2078.43	3470.59	5157.48		0.449265	461
TT95#72	0.239	0.017	0.03512	0.00099	0.0495	0.0033		219	14	222.4	6.2	150	140	0.066	3.8	0.022	2.2	1.36	0.28	16.3	7.6	108	64	296	80	860	186	89	840			TT95#72	0.278481	6.20915	0.231579	4.71092	8.88889	4.82759	79.3187	203.209	425.197	1130.74	1788.52	3137.25	5058.82	7322.83		0.18181	222.4
TT95#73	0.574	0.049	0.0677	0.0043	0.0609	0.0031		452	31	422	26	580	110	10.5	34	4.9	24.9	12.4	2.76	60	19	247	102	509	133	1410	277	261	1090			TT95#73	44.3038	55.5556	51.5789	53.3191	81.0458	47.5862	291.971	508.021	972.441	1802.12	3075.53	5215.69	8294.12	10905.5		0.309347	422
TT95#74	1.172	0.031	0.1323	0.0024	0.0639	0.0017		786	15	801	14	731	58	0.3	11.2	0.16	0.95	0.78	0.41	8.9	2.62	64	24.9	108	31.7	386	93	405	1180			TT95#74	1.26582	18.3007	1.68421	2.03426	5.09804	7.06897	43.309	70.0535	251.969	439.929	652.568	1243.14	2270.59	3661.42		0.475735	801
TT95#75	4.5	0.15	0.2979	0.0084	0.1092	0.002		1725	28	1679	42	1779	34		6.4		0.14	0.7	0.22	1.9	0.29	14.5	5.2	22.9	7.6	87	19.9	104	1070			TT95#75	0	10.4575	0	0.299786	4.57516	3.7931	9.24574	7.75401	57.0866	91.8728	138.369	298.039	511.765	783.465		0.583204	1679
TT95#76	0.239	0.021	0.0344	0.0017	0.0508	0.0046		216	17	218	10	180	180	10.9	75	12.9	47	22.9	5	38	9.2	98	41	295	101	1000	238	238	1080			TT95#76	45.9916	122.549	135.789	100.642	149.673	86.2069	184.915	245.989	385.827	724.382	1782.48	3960.78	5882.35	9370.08		0.518184	218
TT95#77	0.389	0.05	0.0517	0.0037	0.0527	0.005		323	36	325	23	250	200	1.05	9.1	0.74	11.5	6.3	0.49	45	12.7	173	76	246	72	540	122	111	497			TT95#77	4.43038	14.8693	7.78947	24.6253	41.1765	8.44828	218.978	339.572	681.102	1342.76	1486.4	2823.53	3176.47	4803.15		0.0889699	325
TT95#78	0.57	0.022	0.0701	0.0017	0.0587	0.0017		456	14	437	10	532	66	10.5	78	8.4	47	34	3.5	112	33.5	381	143	605	144	1410	310	960	1860			TT95#78	44.3038	127.451	88.4211	100.642	222.222	60.3448	545.012	895.722	1500	2526.5	3655.59	5647.06	8294.12	12204.7		0.173398	437
TT95#79	0.516	0.04	0.0699	0.0043	0.0558	0.0033		417	26	435	26	380	120	0.91	15	0.1	1.8	0.3	0.49	1.8	2.7	26.1	15	97	29.5	298	81	132	428			TT95#79	3.83966	24.5098	1.05263	3.85439	1.96078	8.44828	8.75912	72.1925	102.756	265.018	586.103	1156.86	1752.94	3188.98		2.03856	435
TT95#80	6.08	0.18	0.2946	0.0078	0.1492	0.0027		1982	26	1662	39	2330	31	0.11	4.2	0.021	2.4	3.4	1.07	10.6	1.78	19.4	11.4	54	17.3	168	38	105	628			TT95#80	0.464135	6.86275	0.221053	5.13919	22.2222	18.4483	51.5815	47.5936	76.378	201.413	326.284	678.431	988.235	1496.06		0.544898	1662
TT95#81	0.326	0.031	0.0476	0.0021	0.0502	0.0046		282	24	299	13	130	190		13	0.023	1.27	2.2	0.97	13.4	4.7	74	26.9	131	28.1	301	77	212	346			TT95#81	0	21.2418	0.242105	2.71949	14.3791	16.7241	65.2068	125.668	291.339	475.265	791.541	1101.96	1770.59	3031.5		0.546175	299
TT95#82	0.743	0.038	0.0913	0.0017	0.0588	0.0026		560	22	563	10	511	95				0.36	1	0.1	22.8	9.5	133	66	272	75	760	149	54.7	826			TT95#82	0	0	0	0.770878	6.53595	1.72414	110.949	254.011	523.622	1166.08	1643.5	2941.18	4470.59	5866.14		0.064026	563
TT95#83	0.244	0.038	0.0359	0.0018	0.0515	0.0084		214	31	227	11	30	300	0.067	6.3	0.08	1.5	2.7	0.32	19	6.3	72	28	104	28.4	227	45.7	38.3	112			TT95#83	0.2827	10.2941	0.842105	3.21199	17.6471	5.51724	92.4574	168.449	283.465	494.7	628.399	1113.73	1335.29	1799.21		0.136589	227
TT95#84	0.287	0.02	0.0411	0.0013	0.0502	0.0036		254	16	259.7	8.3	170	150		29.3		0.76	2.2	1.14	24.9	4.4	66	25.6	138	29	391	100	224	556			TT95#84	0	47.8758	0	1.62741	14.3791	19.6552	121.168	117.647	259.843	452.297	833.837	1137.25	2300	3937.01		0.470888	259.7
TT95#85	0.282	0.03	0.0412	0.0013	0.0495	0.005		248	24	260.4	8.1	90	200		18.2	0.55	8	12.4	0.13	65	16.8	175	65.3	280	44.1	491	99	170	287			TT95#85	0	29.7386	5.78947	17.1306	81.0458	2.24138	316.302	449.198	688.976	1153.71	1691.84	1729.41	2888.24	3897.64		0.0139991	260.4
TT95#86	0.298	0.031	0.0449	0.0014	0.0479	0.0052		260	24	283.1	8.5	40	210		13.1			1.29	0.63	4.6	2.07	42	23.3	105	30.5	342	73	152	283			TT95#86	0	21.4052	0	0	8.43137	10.8621	22.3844	55.3476	165.354	411.661	634.441	1196.08	2011.76	2874.02		0.790661	283.1
TT95#87	0.698	0.03	0.0851	0.0018	0.0592	0.0022		535	18	526	11	542	82	7.7	43.9	1.64	7.2	3.7	0.33	12.4	4.1	40.5	19.3	104	24.3	275	55.6	555	1110			TT95#87	32.4895	71.732	17.2632	15.4176	24.183	5.68966	60.3406	109.626	159.449	340.989	628.399	952.941	1617.65	2188.98		0.148945	526
TT95#88	0.615	0.059	0.0813	0.0029	0.0553	0.0054		475	37	504	17	300	200		17.7	0.25	5.4	10.1	0.34	36	13.5	136	59	245	53	413	75	160	233			TT95#88	0	28.9216	2.63158	11.5632	66.0131	5.86207	175.182	360.963	535.433	1042.4	1480.36	2078.43	2429.41	2952.76		0.0545118	504
TT95#90	0.256	0.011	0.0361	0.0007	0.0514	0.0021		230.5	9.2	228.6	4.3	231	88		25.1	0.24	5	19.7	0.068	123	49.8	540	190	820	185	1400	268	1070	1990			TT95#90	0	41.0131	2.52632	10.7066	128.758	1.17241	598.54	1331.55	2125.98	3356.89	4954.68	7254.9	8235.29	10551.2		0.00422325	228.6
TT95#91	1.253	0.091	0.1383	0.0088	0.0653	0.0022		810	42	832	50	754	73		2.9	0.019	0.94	3.8	0.025	32.6	14.4	172	62.9	325	66	700	161	94	770			TT95#91	0	4.73856	0.2	2.01285	24.8366	0.431034	158.637	385.027	677.165	1111.31	1963.75	2588.24	4117.65	6338.58		0.00686694	832
TT95#92	2.19	0.12	0.1847	0.008	0.0857	0.0025		1168	37	1090	43	1314	57	2.2	42	0.29	3.2	7.8	3.19	42	12.7	145	55	238	53.6	564	110	90	439			TT95#92	9.2827	68.6275	3.05263	6.85225	50.9804	55	204.38	339.572	570.866	971.731	1438.07	2101.96	3317.65	4330.71		0.538818	1090
TT95#93	0.245	0.011	0.03455	0.00076	0.0513	0.002		221.8	8.6	218.9	4.7	227	83	0.44	16.2	0.79	4.2	10.1	0.72	48	18.8	213	81.1	366	78	714	146	499	1220			TT95#93	1.85654	26.4706	8.31579	8.99358	66.0131	12.4138	233.577	502.674	838.583	1432.86	2211.48	3058.82	4200	5748.03		0.0999712	218.9
TT95#94	1.435	0.089	0.1554	0.0083	0.067	0.0027		896	38	929	46	830	79		3.6	0.41	4.4	12.4	0.66	80	22.3	243	80	277	58	487	91	283	710			TT95#94	0	5.88235	4.31579	9.42184	81.0458	11.3793	389.294	596.257	956.693	1413.43	1673.72	2274.51	2864.71	3582.68		0.0640637	929
TT95#95	0.304	0.015	0.04198	0.00092	0.0523	0.0024		268	12	265.1	5.7	265	99	0.36	40.3	0.14	2	3.8	0.16	19.5	8.4	130	56.3	261	66	689	160	341	1340			TT95#95	1.51899	65.8497	1.47368	4.28266	24.8366	2.75862	94.8905	224.599	511.811	994.7	1577.04	2588.24	4052.94	6299.21		0.0568244	265.1
TT95#96	1.421	0.059	0.1487	0.0048	0.0689	0.0017		893	25	893	27	883	51	4.8	42	2.2	15.8	17.8	0.38	68	25.5	272	119	466	107	1000	198	1120	1880			TT95#96	20.2532	68.6275	23.1579	33.833	116.34	6.55172	330.9	681.818	1070.87	2102.47	2815.71	4196.08	5882.35	7795.28		0.033392	893
TT95#97	5.05	0.34	0.319	0.016	0.1143	0.0056		1818	54	1778	81	1835	85		11.9		0.24	3.9	0.78	10.2	4.3	53	14.7	74	13.3	158	30.6	94	172			TT95#97	0	19.4444	0	0.513919	25.4902	13.4483	49.635	114.973	208.661	259.717	447.13	521.569	929.412	1204.72		0.378082	1778
TT95#98	0.291	0.015	0.0426	0.00098	0.0496	0.0026		258	12	268.9	6	140	110	3.1	28.4	1.27	9.6	11.3	1.08	47	18.1	169	67	299	66	566	111	568	1550			TT95#98	13.0802	46.4052	13.3684	20.5567	73.8562	18.6207	228.71	483.957	665.354	1183.75	1806.65	2588.24	3329.41	4370.08		0.143271	268.9
TT95#99	0.33	0.022	0.046	0.0013	0.0517	0.0039		287	17	289.8	8.1	240	150		38		0.53	1.06	0.97	14.4	8.7	75	43	180	47	519	129	360	503			TT95#99	0	62.0915	0	1.1349	6.9281	16.7241	70.073	232.62	295.276	759.717	1087.61	1843.14	3052.94	5078.74		0.759034	289.8
TT95#100	0.751	0.07	0.0899	0.0032	0.0623	0.0059		563	43	554	19	540	190		12.3			0.09	0.42	12.8	4.8	60	23	108	28.6	305	67	152	250			TT95#100	0	20.098	0	0	0.588235	7.24138	62.2871	128.342	236.22	406.36	652.568	1121.57	1794.12	2637.8		1.19632	554
TT95#101	0.275	0.04	0.0353	0.0018	0.0587	0.0096		238	32	224	11	240	310		7.8	0.11	4.4	9.9	0.97	51	13	132	59	243	40.5	500	86	125	171			TT95#101	0	12.7451	1.15789	9.42184	64.7059	16.7241	248.175	347.594	519.685	1042.4	1468.28	1588.24	2941.18	3385.83		0.131975	224
TT95#102	0.647	0.03	0.0823	0.0029	0.0567	0.0023		504	19	509	17	459	92	0.74	26.6	0.77	6.9	8.8	1.68	64	19.5	215	71	310	73	690	131	448	890			TT95#102	3.12236	43.4641	8.10526	14.7752	57.5163	28.9655	311.436	521.39	846.457	1254.42	1873.11	2862.75	4058.82	5157.48		0.216422	509
TT95#103	0.653	0.048	0.0817	0.0022	0.0582	0.0045		509	31	506	13	460	160		10.1	0.36	4.8	8.2	0.61	39	9.5	111	42.7	190	34.5	318	63	177	319			TT95#103	0	16.5033	3.78947	10.2784	53.5948	10.5172	189.781	254.011	437.008	754.417	1148.04	1352.94	1870.59	2480.31		0.104283	506
TT95#104	0.688	0.05	0.082	0.0035	0.0606	0.0037		524	30	507	21	550	130	0.039	20.1		1.6	2.9	0.41	22.7	6.4	90	34.7	158	33.8	350	56	206	520			TT95#104	0.164557	32.8431	0	3.42612	18.9542	7.06897	110.462	171.123	354.331	613.074	954.683	1325.49	2058.82	2204.72		0.154488	507
TT95#105	0.37	0.068	0.0414	0.003	0.0609	0.0098		302	50	261	18	410	340		37	0.17	5.1	8.5	6.7	59	13.4	142	63	285	67	710	135	75	158			TT95#105	0	60.4575	1.78947	10.9208	55.5556	115.517	287.105	358.289	559.055	1113.07	1722.05	2627.45	4176.47	5314.96		0.914667	261
TT95#106	0.284	0.027	0.0373	0.0013	0.0567	0.0058		256	23	236	8.1	370	210	7.4	29.5	5.4	32.2	8.9	0.18	52	10.6	130	55	241	48.7	540	95	424	600			TT95#106	31.2236	48.2026	56.8421	68.9507	58.1699	3.10345	253.041	283.422	511.811	971.731	1456.19	1909.8	3176.47	3740.16		0.0255799	236
TT95#107	0.311	0.032	0.0439	0.0018	0.0514	0.0051		270	24	277	11	160	200	0.35	16.2	0.61	5.4	5.8	0.78	29.7	9.1	86	33.4	163	31.7	312	54.4	171	338			TT95#107	1.47679	26.4706	6.42105	11.5632	37.9085	13.4483	144.526	243.316	338.583	590.106	984.894	1243.14	1835.29	2141.73		0.181688	277
TT173#01	0.26	0.039	0.0345	0.0016	0.054	0.0078		229	31	219	10	190	270	39	146	15	75	24	1.8	55	17.8	197	77	420	87	880	192	400	670			TT173#01	164.557	238.562	157.895	160.6	156.863	31.0345	267.64	475.936	775.591	1360.42	2537.76	3411.76	5176.47	7559.06		0.151464	219
TT173#03	0.238	0.033	0.0323	0.0014	0.0561	0.0086		211	27	204.7	9	200	290		45		5.1	8.8	0.3	50	19.7	230	89	349	86	760	150	136	371			TT173#03	0	73.5294	0	10.9208	57.5163	5.17241	243.309	526.738	905.512	1572.44	2108.76	3372.55	4470.59	5905.51		0.0437239	204.7
TT173#04	0.229	0.019	0.0319	0.0013	0.052	0.004		207	16	202.1	7.8	210	160		23.7	0.15	4.7	12.6	1.49	86	28.4	294	114	420	112	1070	174	560	1030			TT173#04	0	38.7255	1.57895	10.0642	82.3529	25.6897	418.491	759.358	1157.48	2014.13	2537.76	4392.16	6294.12	6850.39		0.138381	202.1
TT173#05	0.223	0.027	0.0317	0.0014	0.0514	0.0063		201	23	200.9	8.5	130	240		38	0.16	6.1	16.4	2.1	82	22.5	270	100	447	94	900	164	151	334			TT173#05	0	62.0915	1.68421	13.0621	107.19	36.2069	399.027	601.604	1062.99	1766.78	2700.91	3686.27	5294.12	6456.69		0.175071	200.9
TT173#06	0.231	0.031	0.0321	0.0015	0.054	0.008		206	26	203.7	9.2	210	280		25.9	0.2	7.6	19.1	2.14	87	33.8	352	127	530	106	960	161	216	311			TT173#06	0	42.3203	2.10526	16.2741	124.837	36.8966	423.358	903.743	1385.83	2243.82	3202.42	4156.86	5647.06	6338.58		0.160495	203.7
TT173#07	0.227	0.029	0.0299	0.0017	0.0595	0.0077		203	24	190	11	380	270	4.2	57	5.1	30.5	16.9	6.1	87	23.6	186	76	440	96	1090	220	370	830			TT173#07	17.7215	93.1373	53.6842	65.3105	110.458	105.172	423.358	631.016	732.283	1342.76	2658.61	3764.71	6411.76	8661.42		0.486352	190
TT173#08	0.237	0.026	0.0323	0.0012	0.0532	0.0058		212	21	204.6	7.7	200	210	0.023	59	0.82	7.1	13.9	1.9	83	34	338	118	610	101	1090	197	210	480			TT173#08	0.0970464	96.4052	8.63158	15.2034	90.8497	32.7586	403.893	909.091	1330.71	2084.81	3685.8	3960.78	6411.76	7755.91		0.171014	204.6
TT173#09	0.239	0.026	0.0321	0.0018	0.053	0.006		214	21	204	11	280	240	33.2	127	15.2	108	101	41	570	118	860	310	840	184	1160	219	350	383			TT173#09	140.084	207.516	160	231.263	660.131	706.897	2773.72	3155.08	3385.83	5477.03	5075.53	7215.69	6823.53	8622.05		0.522407	204
TT173#10	0.679	0.022	0.0846	0.0016	0.0577	0.0018		525	13	523.4	9.7	496	66		1.18		2.4	6.8	0.27	54	15.5	145	44	193	32.6	366	66	183	1320			TT173#10	0	1.9281	0	5.13919	44.4444	4.65517	262.774	414.439	570.866	777.385	1166.16	1278.43	2152.94	2598.43		0.0430761	523.4
TT173#11	1.367	0.053	0.1435	0.0052	0.0688	0.0013		870	23	863	30	883	40	0.9	24.7	1.38	11	11	1.31	51	20.1	236	80	426	87	811	158	788	1760			TT173#11	3.79747	40.3595	14.5263	23.5546	71.8954	22.5862	248.175	537.433	929.134	1413.43	2574.02	3411.76	4770.59	6220.47		0.169088	863
TT173#12	0.245	0.033	0.0355	0.0013	0.0505	0.0068		222	28	224.5	7.9	90	250		19.5	0.12	1.83	2.7	0.35	27.3	6.4	91	38.8	179	37.7	423	81	104	213			TT173#12	0	31.8627	1.26316	3.91863	17.6471	6.03448	132.847	171.123	358.268	685.512	1081.57	1478.43	2488.24	3188.98		0.124632	224.5
TT173#13	0.234	0.023	0.0323	0.0014	0.0531	0.0056		210	19	204.6	9	280	230		25.7	0.32	2.9	7.7	1.49	85	19.2	213	86	353	77	720	151	108	294			TT173#13	0	41.9935	3.36842	6.20985	50.3268	25.6897	413.625	513.369	838.583	1519.43	2132.93	3019.61	4235.29	5944.88		0.178055	204.6
TT173#14	0.204	0.022	0.03017	0.00098	0.0494	0.0056		186	19	191.6	6.2	90	220	0.09	44.2	0.17	4	7.2	0.99	41	14.7	190	68.2	304	60	576	96	98	227			TT173#14	0.379747	72.2222	1.78947	8.56531	47.0588	17.069	199.513	393.048	748.031	1204.95	1836.86	2352.94	3388.24	3779.53		0.176157	191.6
TT173#15	0.226	0.019	0.032	0.0011	0.0517	0.0047		207	15	202.7	6.7	180	180		28.8	0.41	7.6	15.4	2.03	83	24.2	300	108	474	90.1	719	132	158	270			TT173#15	0	47.0588	4.31579	16.2741	100.654	35	403.893	647.059	1181.1	1908.13	2864.05	3533.33	4229.41	5196.85		0.173588	202.7
TT173#16	1.131	0.026	0.1272	0.0021	0.0642	0.0013		767	12	772	12	739	43		17.3		2.3	8.9	0.03	54	19.1	219	94	434	72.9	840	151	680	1690			TT173#16	0	28.268	0	4.92505	58.1699	0.517241	262.774	510.695	862.205	1660.78	2622.36	2858.82	4941.18	5944.88		0.00418363	772
TT173#17	1.22	0.11	0.132	0.0089	0.0655	0.0023		793	52	796	51	779	71	0.039	9	0.12	1.34	2.7		33	14.4	156	54	270	57	490	93	400	1090			TT173#17	0.164557	14.7059	1.26316	2.86938	17.6471	0	160.584	385.027	614.173	954.064	1631.42	2235.29	2882.35	3661.42		0	796
TT173#18	0.225	0.025	0.0326	0.0012	0.0504	0.0059		202	21	207	7.8	90	220	0.27	39	0.25	6	11.5	1.56	88	23.5	281	96	467	79	780	140	174	313			TT173#18	1.13924	63.7255	2.63158	12.848	75.1634	26.8966	428.224	628.342	1106.3	1696.11	2821.75	3098.04	4588.24	5511.81		0.149919	207
TT173#19	0.668	0.014	0.0844	0.0013	0.0572	0.0011		519.1	8.6	522.4	7.6	489	44	4.4	8.3	1.13	4.4	3.6	0.05	16.5	7.1	89	27.6	154	28.5	309	61.5	299	2570			TT173#19	18.5654	13.5621	11.8947	9.42184	23.5294	0.862069	80.292	189.84	350.394	487.633	930.514	1117.65	1817.65	2421.26		0.0198335	522.4
TT173#20	0.316	0.031	0.047	0.0016	0.0487	0.0049		274	24	296.1	9.9	50	190	0.046	2.5		0.72	0.98	0.22	11.1	4.1	55	21.1	95	28.3	270	58.9	86	334			TT173#20	0.194093	4.08497	0	1.54176	6.40523	3.7931	54.0146	109.626	216.535	372.792	574.018	1109.8	1588.24	2318.9		0.203926	296.1
TT173#21	0.581	0.043	0.0792	0.0027	0.054	0.0043		459	28	491	16	310	170		8.5		3.4	6.5	0.22	15	8.9	82	29.2	129	22.7	244	41.1	102	252			TT173#21	0	13.8889	0	7.28051	42.4837	3.7931	72.9927	237.968	322.835	515.901	779.456	890.196	1435.29	1618.11		0.0681152	491
TT173#22	0.214	0.016	0.0322	0.00089	0.0486	0.0038		196	13	204.2	5.5	110	160		11.3		1.12	3.8	0.38	27.7	14.7	177	68.7	351	84	742	145	243	741			TT173#22	0	18.4641	0	2.39829	24.8366	6.55172	134.793	393.048	696.85	1213.78	2120.85	3294.12	4364.71	5708.66		0.113234	204.2
TT173#23	0.22	0.022	0.033	0.0012	0.0499	0.0056		199	18	208.9	7.6	90	210	0.33	41.4	0.104	2.7	2.2	1.27	18.2	7.8	99	37	197	49.1	640	120	198	305			TT173#23	1.39241	67.6471	1.09474	5.78158	14.3791	21.8966	88.5645	208.556	389.764	653.71	1190.33	1925.49	3764.71	4724.41		0.613593	208.9
TT173#24	0.297	0.025	0.0425	0.0014	0.0518	0.0043		266	20	268.5	8.6	220	170		5.3		3	2.7	0.56	30	6.1	61	26.6	116	23.7	260	50.3	147	484			TT173#24	0	8.66013	0	6.42398	17.6471	9.65517	145.985	163.102	240.157	469.965	700.906	929.412	1529.41	1980.31		0.190226	268.5
TT173#25	0.692	0.029	0.0862	0.0022	0.0581	0.0023		531	17	533	13	500	83						0.11		0.11	6	0.37	9.8	1.64	38	5.3	48.1	960			TT173#25	0	0	0	0	0	1.89655	0	2.94118	23.622	6.5371	59.2145	64.3137	223.529	208.661		#DIV/0!	533
TT173#26	0.377	0.051	0.0464	0.0024	0.0601	0.0088		318	38	292	15	420	290	0.36	39.3	0.54	4.1	5.8	1.7	21.8	8.7	86	46	224	65	640	115	190	300			TT173#26	1.51899	64.2157	5.68421	8.77944	37.9085	29.3103	106.083	232.62	338.583	812.721	1353.47	2549.02	3764.71	4527.56		0.4622	292
TT173#27	0.313	0.021	0.0424	0.0014	0.0532	0.0033		275	16	267.8	8.4	300	130		17	0.11	2.4	7.4	0.041	59	18.9	315	121	497	99	920	155	728	1620			TT173#27	0	27.7778	1.15789	5.13919	48.366	0.706897	287.105	505.348	1240.16	2137.81	3003.02	3882.35	5411.76	6102.36		0.00599882	267.8
TT173#28	0.671	0.037	0.0859	0.0031	0.0562	0.0021		517	22	531	18	427	82		1.4	0.13	2.8	4.7		20.6	4.8	74	30	166	45.9	513	116	52	1600			TT173#28	0	2.28758	1.36842	5.99572	30.719	0	100.243	128.342	291.339	530.035	1003.02	1800	3017.65	4566.93		0	531
TT173#29	0.659	0.032	0.0858	0.0022	0.0561	0.0027		514	21	531	13	410	110		0.13					5.4	3.3	37	16.5	69	16.2	215	32.4	21.1	700			TT173#29	0	0.212418	0	0	0	0	26.2774	88.2353	145.669	291.519	416.918	635.294	1264.71	1275.59		#DIV/0!	531
TT173#30	0.249	0.041	0.0318	0.0014	0.0567	0.0092		219	33	201.7	9	260	300		29.9	0.65	7.9	23.5	4.2	128	42.2	440	129	517	102	950	131	156	315			TT173#30	0	48.8562	6.84211	16.9165	153.595	72.4138	622.871	1128.34	1732.28	2279.15	3123.87	4000	5588.24	5157.48		0.234118	201.7
TT173#31	0.728	0.044	0.0933	0.0027	0.0561	0.0028		552	25	575	16	420	110	8.8	29	3.2	13.4	6.9	0.46	22.3	6.4	94	33	154	34.8	365	66.3	193	1200			TT173#31	37.1308	47.3856	33.6842	28.6938	45.098	7.93103	108.516	171.123	370.079	583.039	930.514	1364.71	2147.06	2610.24		0.113372	575
TT173#32	1.035	0.033	0.1187	0.0025	0.063	0.0016		719	16	723	14	692	53	0.12	5.6	0.15	1.06	4.6		16.5	10.9	189	82	372	83	750	157	447	2040			TT173#32	0.506329	9.15033	1.57895	2.26981	30.0654	0	80.292	291.444	744.094	1448.76	2247.73	3254.9	4411.76	6181.1		0	723
TT173#33	0.222	0.025	0.0324	0.0012	0.0505	0.0057		200	20	205.5	7.8	100	210	5.4	36.7	2.01	12.1	9	1.36	35.2	12.4	169	61.7	239	52.2	490	91	74.2	203			TT173#33	22.7848	59.9673	21.1579	25.9101	58.8235	23.4483	171.29	331.551	665.354	1090.11	1444.11	2047.06	2882.35	3582.68		0.233598	205.5
TT173#34	0.287	0.012	0.03949	0.00084	0.0527	0.0023		255.3	9.1	249.6	5.2	282	93	0.32	32.3	0.86	4.1	6.4	0.91	27.7	10.7	111	51.5	262	60.3	623	146	511	1170			TT173#34	1.35021	52.7778	9.05263	8.77944	41.8301	15.6897	134.793	286.096	437.008	909.894	1583.08	2364.71	3664.71	5748.03		0.208947	249.6
TT173#35	0.231	0.014	0.0271	0.0012	0.0627	0.0037		210	11	172.3	7.2	650	120	3.7	66	5.9	45	31.6	7.3	89	23.8	223	94	466	141	1500	312	800	1520			TT173#35	15.6118	107.843	62.1053	96.3597	206.536	125.862	433.09	636.364	877.953	1660.78	2815.71	5529.41	8823.53	12283.5		0.420831	172.3
TT173#36	0.229	0.01	0.03218	0.00076	0.0519	0.0026		209.2	8.5	204.2	4.8	250	110	1.22	22.8	1.51	13	10.5	2.13	43	11.3	137	48.7	267	76	658	142	318	1050			TT173#36	5.14768	37.2549	15.8947	27.8373	68.6275	36.7241	209.246	302.139	539.37	860.424	1613.29	2980.39	3870.59	5590.55		0.30646	204.2
TT173#37	0.239	0.013	0.03432	0.00077	0.0507	0.003		217	11	217.5	4.8	180	120	5.7	29.4	2.16	14.8	13.2		76	25.1	310	105	487	110	780	150	430	950			TT173#37	24.0506	48.0392	22.7368	31.6916	86.2745	0	369.83	671.123	1220.47	1855.12	2942.6	4313.73	4588.24	5905.51		0	217.5
TT173#38	0.306	0.014	0.0429	0.0012	0.0528	0.0027		272	11	270.8	7.3	280	110	0.07	16.3	0.42	3.1	3.3	0.83	9.3	4.1	50	20.2	100	23.2	373	90	276	1070			TT173#38	0.295359	26.634	4.42105	6.63812	21.5686	14.3103	45.2555	109.626	196.85	356.89	604.23	909.804	2194.12	3543.31		0.45804	270.8
TT173#39	0.298	0.015	0.0423	0.0011	0.051	0.0026		264	12	267.1	6.9	220	110	0.083	12.3	0.13	2.7	2.4	0.17	25.7	12	159	58	339	87	810	168	341	1250			TT173#39	0.350211	20.098	1.36842	5.78158	15.6863	2.93103	125.061	320.856	625.984	1024.73	2048.34	3411.76	4764.71	6614.17		0.066176	267.1
TT173#40	2.56	0.26	0.183	0.014	0.0976	0.0037		1240	77	1074	76	1549	71	1.5	11.3	0.68	3.7	4.3	1.65	17	8	103	34.9	155	40.1	404	87	69	674			TT173#40	6.32911	18.4641	7.15789	7.92291	28.1046	28.4483	82.7251	213.904	405.512	616.608	936.556	1572.55	2376.47	3425.2		0.589996	1074
TT173#41	0.281	0.022	0.0422	0.0012	0.0476	0.0035		252	18	266.3	7.4	90	150	25.8	93	6.8	29	6	1.62	18.4	7	102	34.5	200	49	445	81	399	796			TT173#41	108.861	151.961	71.5789	62.0985	39.2157	27.931	89.5377	187.166	401.575	609.541	1208.46	1921.57	2617.65	3188.98		0.471362	266.3
TT173#42	0.322	0.027	0.0426	0.0014	0.0543	0.0041		282	21	269	8.9	340	170	0.02	26	0.133	4.2	2.1	0.5	17	11.9	137	41.5	248	59	550	120	391	1090			TT173#42	0.0843882	42.4837	1.4	8.99358	13.7255	8.62069	82.7251	318.182	539.37	733.216	1498.49	2313.73	3235.29	4724.41		0.255835	269
TT173#43	0.6	0.022	0.0768	0.0019	0.0565	0.0018		476	14	477	11	464	65	0.77	13.1	1.17	10.1	4.8	0.56	26.2	10.6	151	53	284	73	750	148	87	2410			TT173#43	3.24895	21.4052	12.3158	21.6274	31.3725	9.65517	127.494	283.422	594.488	936.396	1716.01	2862.75	4411.76	5826.77		0.152665	477
TT173#44	0.304	0.021	0.0379	0.0021	0.0592	0.0034		267	16	239	13	530	120	3.13	52	5.9	43	20.2	5.1	69	16.4	156	62	320	87	820	155	364	1290			TT173#44	13.2068	84.9673	62.1053	92.0771	132.026	87.931	335.766	438.503	614.173	1095.41	1933.53	3411.76	4823.53	6102.36		0.417632	239
TT173#45	0.213	0.016	0.03087	0.00079	0.0499	0.0036		195	13	195.9	5	160	150	0.41	42.8	0.15	4.5	6.3	1	43	13.4	181	83	334	71.2	732	130	238	495			TT173#45	1.72996	69.9346	1.57895	9.63597	41.1765	17.2414	209.246	358.289	712.598	1466.43	2018.13	2792.16	4305.88	5118.11		0.185746	195.9
TT173#46	0.223	0.044	0.0312	0.0015	0.054	0.012		193	36	198.1	9.5	0	370	0.13	17.1	0.33	3.8	3.2	0.93	8.3	4.14	43	20.6	102	29.8	336	65	71	159			TT173#46	0.548523	27.9412	3.47368	8.13704	20.915	16.0345	40.3893	110.695	169.291	363.958	616.314	1168.63	1976.47	2559.06		0.551687	198.1
TT173#47	0.204	0.028	0.0311	0.0015	0.0477	0.0066		184	24	197	9.4	10	260		29.2	0.19	4.6	8.5	1.39	48	17.1	215	78	328	72	610	111	105	235			TT173#47	0	47.7124	2	9.85011	55.5556	23.9655	233.577	457.219	846.457	1378.09	1981.87	2823.53	3588.24	4370.08		0.210382	197
TT173#48	0.21	0.016	0.03129	0.00078	0.0483	0.0036		192	14	198.6	4.9	80	150		8.2		1.11	7	0.59	29.1	11.7	175	59	300	69	580	123	165	492			TT173#48	0	13.3987	0	2.37687	45.7516	10.1724	141.606	312.834	688.976	1042.4	1812.69	2705.88	3411.76	4842.52		0.126381	198.6
TT173#49	0.219	0.021	0.0324	0.0011	0.0503	0.0052		202	19	205.6	6.9	110	200	3.4	35.5	1.06	8.4	4.8	0.21	28.6	8.3	147	60	245	75	574	127	321	580			TT173#49	14.346	58.0065	11.1579	17.9872	31.3725	3.62069	139.173	221.925	578.74	1060.07	1480.36	2941.18	3376.47	5000		0.0547948	205.6
TT173#50	0.228	0.035	0.0315	0.0013	0.052	0.0071		202	28	199.7	8.4	110	260		29.1	0.29	6.5	12.5	0.97	61	22.4	225	92	445	80	676	126	102	221			TT173#50	0	47.549	3.05263	13.9186	81.6993	16.7241	296.837	598.93	885.827	1625.44	2688.82	3137.25	3976.47	4960.63		0.107393	199.7
TT173#51	0.659	0.04	0.0808	0.0024	0.0586	0.0032		509	24	501	14	490	120	20	56	7.5	40	11.1	0.16	44	14.5	177	69	271	46.4	377	77	160	337			TT173#51	84.3882	91.5033	78.9474	85.6531	72.549	2.75862	214.112	387.701	696.85	1219.08	1637.46	1819.61	2217.65	3031.5		0.0221338	501
TT173#52	0.179	0.018	0.0278	0.001	0.047	0.0051		166	15	176.8	6.3	10	210	0.025	36.5	0.39	5.6	10	1.92	40	20	294	104	434	99	910	187	480	740			TT173#52	0.105485	59.6405	4.10526	11.9914	65.3595	33.1034	194.647	534.759	1157.48	1837.46	2622.36	3882.35	5352.94	7362.2		0.293491	176.8
TT173#53	0.659	0.046	0.0811	0.0025	0.0591	0.0045		508	28	502	15	470	160		7	0.13	2.9	4.5	0.072	21.6	8.4	105	30	145	26.1	234	40.8	106	257			TT173#53	0	11.4379	1.36842	6.20985	29.4118	1.24138	105.109	224.599	413.386	530.035	876.133	1023.53	1376.47	1606.3		0.0223266	502
TT173#54	0.228	0.027	0.0325	0.0011	0.0505	0.006		205	22	206.4	6.8	90	220	0.35	33.2	0.42	6.1	9.5	1.22	47	17	214	80	361	69.6	612	113	115	259			TT173#54	1.47679	54.2484	4.42105	13.0621	62.0915	21.0345	228.71	454.545	842.52	1413.43	2181.27	2729.41	3600	4448.82		0.176511	206.4
TT173#55	0.208	0.02	0.0313	0.0011	0.0483	0.0046		189	16	198.7	6.6	50	180		35.9	0.29	4.3	8.7	1.04	60	14.8	191	66.7	285	64.5	507	94	126	243			TT173#55	0	58.6601	3.05263	9.20771	56.8627	17.931	291.971	395.722	751.969	1178.45	1722.05	2529.41	2982.35	3700.79		0.139162	198.7
TT173#56	0.227	0.044	0.031	0.0017	0.054	0.012		201	36	197	11	170	400	600	2080	251	1250	330	32	144	16.2	156	63.7	250	55	464	94	98	220			TT173#56	2531.65	3398.69	2642.11	2676.66	2156.86	551.724	700.73	433.155	614.173	1125.44	1510.57	2156.86	2729.41	3700.79		0.448782	197
TT173#57	0.222	0.025	0.0313	0.0013	0.0526	0.0063		200	21	198.5	8	160	240		19.9	0.49	11.5	35.4	10.4	142	35.7	395	125	500	89.3	800	132	204	302			TT173#57	0	32.5163	5.15789	24.6253	231.373	179.31	690.998	954.545	1555.12	2208.48	3021.15	3501.96	4705.88	5196.85		0.448447	198.5
TT173#58	0.223	0.02	0.0307	0.0012	0.0541	0.0054		203	16	194.9	7.5	270	200	6.5	59	2.2	6.1	8.6	1.48	38.1	15	193	61.7	300	59.6	520	90	174	313			TT173#58	27.4262	96.4052	23.1579	13.0621	56.2092	25.5172	185.401	401.07	759.843	1090.11	1812.69	2337.25	3058.82	3543.31		0.249962	194.9
TT173#59	0.622	0.05	0.0831	0.0026	0.0544	0.0044		483	31	515	15	300	170	0.18	10.3		2.4	4.2		21.9	9	109	42.5	205	41	351	55.5	105	321			TT173#59	0.759494	16.8301	0	5.13919	27.451	0	106.569	240.642	429.134	750.883	1238.67	1607.84	2064.71	2185.04		0	515
TT173#60	1.7	0.15	0.1548	0.0046	0.0783	0.0052		1000	55	927	26	1110	120	0.34	7.2	0.2	3.8	8.8	0.46	43	18.3	213	69	329	59.7	588	115	283	687			TT173#60	1.4346	11.7647	2.10526	8.13704	57.5163	7.93103	209.246	489.305	838.583	1219.08	1987.92	2341.18	3458.82	4527.56		0.0722946	927
TT173#61	0.231	0.027	0.0329	0.0011	0.0513	0.0062		207	22	208.5	7	110	230		32	0.46	8.8	11.9	2.6	72	24.4	286	105	399	94	730	145	147	282			TT173#61	0	52.2876	4.84211	18.8437	77.7778	44.8276	350.365	652.406	1125.98	1855.12	2410.88	3686.27	4294.12	5708.66		0.271555	208.5
TT173#62	0.744	0.04	0.0919	0.003	0.0582	0.0028		561	23	566	17	510	110		0.44	0.049	1.9	5	0.27	34.4	14.9	182	65	257	43.5	375	71	101	741			TT173#62	0	0.718954	0.515789	4.06852	32.6797	4.65517	167.397	398.396	716.535	1148.41	1552.87	1705.88	2205.88	2795.28		0.0629395	566
TT173#63	0.736	0.032	0.0895	0.0027	0.0599	0.0019		562	20	552	16	580	66		0.8		2.1	5.7		38	34	350	94	317	71	530	103	183	1730			TT173#63	0	1.30719	0	4.49679	37.2549	0	184.915	909.091	1377.95	1660.78	1915.41	2784.31	3117.65	4055.12		0	552
TT173#64	0.228	0.031	0.0314	0.0015	0.0531	0.0074		203	26	198.9	9.6	140	270		30.6	0.08	2.8	3.9	0.65	36	10.9	167	52.8	230	59	438	93	72	205			TT173#64	0	50	0.842105	5.99572	25.4902	11.2069	175.182	291.444	657.48	932.862	1389.73	2313.73	2576.47	3661.42		0.167708	198.9
TT173#65	0.577	0.03	0.0743	0.0014	0.0554	0.0028		459	19	462.1	8.1	400	110	0.36	15.6	0.7	7.9	12.4	0.88	56	14.7	171	55.9	220	39.5	402	67.1	356	587			TT173#65	1.51899	25.4902	7.36842	16.9165	81.0458	15.1724	272.506	393.048	673.228	987.633	1329.31	1549.02	2364.71	2641.73		0.102094	462.1
TT173#66	0.231	0.026	0.0322	0.0011	0.052	0.0054		207	21	204	6.9	160	200		26.1	0.35	4.7	10.5	3	77	23.1	268	111	455	88	870	190	240	345			TT173#66	0	42.6471	3.68421	10.0642	68.6275	51.7241	374.696	617.647	1055.12	1961.13	2749.24	3450.98	5117.65	7480.31		0.322556	204
TT173#67	0.667	0.028	0.0837	0.0021	0.0574	0.0018		516	17	518	13	483	68	0.021	19.1	0.47	5.7	11.1	0.28	53	15.5	205	57.1	263	48.8	473	82	800	1740			TT173#67	0.0886076	31.2092	4.94737	12.2056	72.549	4.82759	257.908	414.439	807.087	1008.83	1589.12	1913.73	2782.35	3228.35		0.0352925	518
TT173#68	1.634	0.064	0.1651	0.0043	0.0724	0.0027		983	26	984	24	964	80	7.1	25.6	2.21	11.2	9.4	1.26	44	13.7	200	82	320	63	590	112	372	630			TT173#68	29.9578	41.8301	23.2632	23.9829	61.4379	21.7241	214.112	366.31	787.402	1448.76	1933.53	2470.59	3470.59	4409.45		0.18941	984
TT173#69	0.643	0.028	0.083	0.0022	0.0559	0.0018		502	17	514	13	427	75	0.02	9.1	0.61	8.9	14.2	0.83	75	22.7	254	79	307	60	552	98	489	1010			TT173#69	0.0843882	14.8693	6.42105	19.0578	92.8105	14.3103	364.964	606.952	1000	1395.76	1854.98	2352.94	3247.06	3858.27		0.0777547	514
TT173#70	0.67	0.041	0.0868	0.0036	0.0554	0.0024		518	24	537	21	403	98		3.8	0.11	7.7	17	1.02	67	20.3	231	140	470	70	900	210	331	1020			TT173#70	0	6.20915	1.15789	16.4882	111.111	17.5862	326.034	542.781	909.449	2473.5	2839.88	2745.1	5294.12	8267.72		0.0923979	537
TT173#71	0.307	0.033	0.0422	0.0017	0.0526	0.0055		267	26	266	11	200	210		2.7	0.2	1.32	5.8	0.15	20.8	11	139	57.7	236	43.9	418	87	127	335			TT173#71	0	4.41176	2.10526	2.82655	37.9085	2.58621	101.217	294.118	547.244	1019.43	1425.98	1721.57	2458.82	3425.2		0.0417512	266
TT173#72	0.241	0.026	0.0332	0.0012	0.0529	0.0057		216	21	210.3	7.7	190	210		36.4	0.19	7.3	10.9	1.14	59	20.1	279	95	368	72.8	613	136	146	265			TT173#72	0	59.4771	2	15.6317	71.2418	19.6552	287.105	537.433	1098.43	1678.45	2223.56	2854.9	3605.88	5354.33		0.137432	210.3
TT173#73	0.292	0.017	0.0428	0.0018	0.049	0.0028		259	13	270	11	160	130	0.2	9.2	0.21	2	1.7	0.22	15.7	5.9	103	48.3	189	49.6	475	107	258	1050			TT173#73	0.843882	15.0327	2.21053	4.28266	11.1111	3.7931	76.399	157.754	405.512	853.357	1141.99	1945.1	2794.12	4212.6		0.130188	270
TT173#74	0.231	0.027	0.0315	0.0013	0.0535	0.0062		207	22	199.8	7.8	200	230		26	0.25	2.9	8.6	2.7	58	12.4	157	55.5	229	46.9	450	88	96	209			TT173#74	0	42.4837	2.63158	6.20985	56.2092	46.5517	282.238	331.551	618.11	980.565	1383.69	1839.22	2647.06	3464.57		0.369593	199.8
TT173#75	1.144	0.074	0.1201	0.0059	0.0685	0.0026		764	36	730	34	847	82	0.025	5.1	0.4	5	5.1	1	26.2	11	132	50.6	223	49.3	548	104	117	387			TT173#75	0.105485	8.33333	4.21053	10.7066	33.3333	17.2414	127.494	294.118	519.685	893.993	1347.43	1933.33	3223.53	4094.49		0.264477	730
TT173#76	0.232	0.03	0.0318	0.0014	0.0539	0.0072		212	26	201.8	8.7	220	260		27.7	0.35	8.3	14.7	2.52	90	25.1	345	121	520	96	850	154	133	258			TT173#76	0	45.2614	3.68421	17.773	96.0784	43.4483	437.956	671.123	1358.27	2137.81	3141.99	3764.71	5000	6062.99		0.211809	201.8
TT173#77	0.242	0.03	0.0315	0.0013	0.0568	0.0076		216	24	199.8	7.9	280	260		25.1	0.36	7.4	15.9	1.83	59	22.7	285	107	417	67.9	728	127	122	229			TT173#77	0	41.0131	3.78947	15.8458	103.922	31.5517	287.105	606.952	1122.05	1890.46	2519.64	2662.75	4282.35	5000		0.182663	199.8
TT173#78	0.238	0.026	0.0333	0.0013	0.0533	0.006		213	21	211.4	7.8	200	220	242	630	81	370	80	4	98	25.9	252	86	342	80	690	141	98	285			TT173#78	1021.1	1029.41	852.632	792.291	522.876	68.9655	476.886	692.513	992.126	1519.43	2066.47	3137.25	4058.82	5551.18		0.13811	211.4
TT173#79	0.207	0.023	0.0298	0.0013	0.0502	0.006		188	19	188.9	8.3	120	220	0.44	28.7	1.4	16.1	15.3	2.48	62	22.3	317	74	341	73	840	147	361	567			TT173#79	1.85654	46.8954	14.7368	34.4754	100	42.7586	301.703	596.257	1248.03	1307.42	2060.42	2862.75	4941.18	5787.4		0.246169	188.9
TT173#80	0.301	0.024	0.0431	0.0014	0.0511	0.004		264	19	272.1	8.7	190	160		15.5		1.2	1.7	0.28	9.5	4.3	63	25.9	137	31.5	374	86	232	548			TT173#80	0	25.3268	0	2.56959	11.1111	4.82759	46.2287	114.973	248.031	457.597	827.795	1235.29	2200	3385.83		0.213008	272.1
TT173#81	0.238	0.037	0.0326	0.0015	0.0541	0.0095		210	30	206.9	9.6	150	310	0.16	21.5	0.43	9.3	15.6	3.2	90	21.9	248	85	313	64	610	104	138	209			TT173#81	0.675105	35.1307	4.52632	19.9143	101.961	55.1724	437.956	585.561	976.378	1501.77	1891.24	2509.8	3588.24	4094.49		0.26109	206.9
TT173#82	0.514	0.024	0.0656	0.0021	0.0572	0.0025		424	18	410	13	466	92	3.4	16.5	3.05	21.6	10.8	2.87	36	10.8	102	38.3	223	65	880	165	104	1410			TT173#82	14.346	26.9608	32.1053	46.2527	70.5882	49.4828	175.182	288.77	401.575	676.678	1347.43	2549.02	5176.47	6496.06		0.444982	410
TT173#83	1.176	0.054	0.1323	0.004	0.0636	0.0021		785	25	800	23	721	76	0.44	9.5		1.6	3.3		28	10.3	166	60	341	66	610	113	283	950			TT173#83	1.85654	15.5229	0	3.42612	21.5686	0	136.253	275.401	653.543	1060.07	2060.42	2588.24	3588.24	4448.82		0	800
TT173#84	0.381	0.044	0.0507	0.0054	0.0559	0.0029		321	31	317	33	400	110	1.49	20.7	1.82	13.7	11.2	1.81	21.1	10.6	135	44.9	328	107	1450	295	178	1200			TT173#84	6.28692	33.8235	19.1579	29.3362	73.2026	31.2069	102.676	283.422	531.496	793.286	1981.87	4196.08	8529.41	11614.2		0.359958	317
TT173#85	0.252	0.03	0.0354	0.0013	0.0532	0.006		228	25	224.5	8.1	190	220		27.4		1.9	4.4		38	14.9	191	65	254	47.8	490	101	254	499			TT173#85	0	44.7712	0	4.06852	28.7582	0	184.915	398.396	751.969	1148.41	1534.74	1874.51	2882.35	3976.38		0	224.5
TT173#86	0.468	0.055	0.0601	0.0064	0.0562	0.0023		380	37	375	39	426	88	2.5	25.1	3.5	27.6	23.3	4.5	52	18.2	225	107	640	209	2840	510	500	1930			TT173#86	10.5485	41.0131	36.8421	59.1006	152.288	77.5862	253.041	486.631	885.827	1890.46	3867.07	8196.08	16705.9	20078.7		0.395236	375
TT173#87	0.228	0.033	0.0313	0.0016	0.0534	0.008		202	27	198.4	9.9	170	290		22.8	0.22	7.6	19.4	1.76	74	23.4	269	95	412	77	604	126	124	225			TT173#87	0	37.2549	2.31579	16.2741	126.797	30.3448	360.097	625.668	1059.06	1678.45	2489.43	3019.61	3552.94	4960.63		0.14201	198.4
TT173#88	0.24	0.033	0.0315	0.0015	0.0565	0.0079		214	26	199.8	9.2	310	280		25.9	0.18	5	12.1	1.56	62	19.3	259	96	358	77	720	124	119	239			TT173#88	0	42.3203	1.89474	10.7066	79.085	26.8966	301.703	516.043	1019.69	1696.11	2163.14	3019.61	4235.29	4881.89		0.174124	199.8
TT173#89	0.949	0.046	0.1078	0.0037	0.0639	0.0026		674	24	659	22	721	88	0.34	7.1	0.37	2	0.87	0.054	14.1	5.4	99	80	380	57	790	177	280	1130			TT173#89	1.4346	11.6013	3.89474	4.28266	5.68627	0.931034	68.6131	144.385	389.764	1413.43	2296.07	2235.29	4647.06	6968.5		0.0471355	659
TT173#90	0.228	0.029	0.0356	0.0017	0.0489	0.0065		208	25	225	10	20	240		13.2		0.19	3.1		8.9	3.1	99	35	179	38	430	90	210	490			TT173#90	0	21.5686	0	0.406852	20.2614	0	43.309	82.8877	389.764	618.375	1081.57	1490.2	2529.41	3543.31		0	225
TT173#91	0.224	0.043	0.0334	0.0024	0.053	0.011		195	35	212	15	0	350		37	0.45	1.6	8.6	1.46	78	32	430	141	710	105	1290	163	153	310			TT173#91	0	60.4575	4.73684	3.42612	56.2092	25.1724	379.562	855.615	1692.91	2491.17	4290.03	4117.65	7588.24	6417.32		0.172338	212
TT173#92	0.197	0.045	0.0316	0.0019	0.0445	0.0097		173	37	201	12	-250	370	0.035	30.2	0.076	4.5	12.9	1.57	59	27.6	287	105	391	86	780	118	133	220			TT173#92	0.147679	49.3464	0.8	9.63597	84.3137	27.069	287.105	737.968	1129.92	1855.12	2362.54	3372.55	4588.24	4645.67		0.173981	201
TT173#93	0.719	0.035	0.0916	0.003	0.0568	0.0021		547	21	565	17	457	81		1.8		1.9	7.7		90	32	330	138	670	107	1180	206	420	1960			TT173#93	0	2.94118	0	4.06852	50.3268	0	437.956	855.615	1299.21	2438.16	4048.34	4196.08	6941.18	8110.24		0	565
TT173#94	0.774	0.081	0.0807	0.0075	0.069	0.0027		564	47	498	45	862	85	4	30	4.4	29	16.8	3.4	55	14.9	209	83	437	123	1180	229	190	1060			TT173#94	16.8776	49.0196	46.3158	62.0985	109.804	58.6207	267.64	398.396	822.835	1466.43	2640.48	4823.53	6941.18	9015.75		0.341953	498
TT173#95	0.235	0.022	0.03255	0.00078	0.0524	0.005		212	18	206.4	4.9	200	180		24.2	0.35	7.3	12.2	0.41	63	22.3	281	87	437	79	810	131	279	505			TT173#95	0	39.5425	3.68421	15.6317	79.7386	7.06897	306.569	596.257	1106.3	1537.1	2640.48	3098.04	4764.71	5157.48		0.0452124	206.4
TT173#96	0.212	0.022	0.0333	0.0015	0.0469	0.005		192	19	211.2	9.5	-20	200		11.5	0.07	1	3.6	0.29	16.2	9.7	169	56	293	65	690	140	134	570			TT173#96	0	18.7908	0.736842	2.14133	23.5294	5	78.8321	259.358	665.354	989.399	1770.39	2549.02	4058.82	5511.81		0.116095	211.2
TT173#97	0.199	0.052	0.0319	0.0027	0.053	0.016		171	42	202	17	-160	450		12.9	0.32	5	5.6	0.98	23.6	6.6	78	25.3	121	25.4	252	45.4	178	94			TT173#97	0	21.0784	3.36842	10.7066	36.6013	16.8966	114.842	176.471	307.087	446.996	731.118	996.078	1482.35	1787.4		0.260615	202
TT173#98	0.229	0.026	0.0345	0.0014	0.0463	0.0047		207	21	218.6	8.7	10	200	0.79	35	0.17	2.6	9.8		53	22.4	274	91	451	74	660	131	331	602			TT173#98	3.33333	57.1895	1.78947	5.56745	64.0523	0	257.908	598.93	1078.74	1607.77	2725.08	2901.96	3882.35	5157.48		0	218.6
TT173#99	0.239	0.04	0.0336	0.0019	0.053	0.0085		211	32	213	12	140	310		27.2	0.32	4.5	8.7	2.5	64	26.8	256	108	400	81	840	130	145	264			TT173#99	0	44.4444	3.36842	9.63597	56.8627	43.1034	311.436	716.578	1007.87	1908.13	2416.92	3176.47	4941.18	5118.11		0.323902	213
TT173#100	0.259	0.039	0.0347	0.0019	0.0552	0.0088		228	31	220	12	190	290		28	0.21	1.8	5.6	0.74	31	13.3	240	95	480	70	870	141	117	318			TT173#100	0	45.7516	2.21053	3.85439	36.6013	12.7586	150.852	355.615	944.882	1678.45	2900.3	2745.1	5117.65	5551.18		0.171704	220
TT173#101	0.205	0.029	0.0329	0.0015	0.0485	0.0072		190	26	208.5	9.4	10	270	3	78	0.2	9	7	1.23	37	10.8	236	77	319	83	930	175	348	378			TT173#101	12.6582	127.451	2.10526	19.2719	45.7516	21.2069	180.049	288.77	929.134	1360.42	1927.49	3254.9	5470.59	6889.76		0.233657	208.5
TT173#102	0.303	0.021	0.0447	0.0017	0.0503	0.0037		267	16	282	10	160	150		16.8		0.56	2.3		14.2	6.2	64	35.5	209	47	600	142	440	1000			TT173#102	0	27.451	0	1.19914	15.0327	0	69.0998	165.775	251.969	627.208	1262.84	1843.14	3529.41	5590.55		0	282
TT173#103	1.412	0.065	0.1457	0.0036	0.0692	0.0028		888	27	880	21	884	92		1.2	0.026	1.9	3.3	0.09	42	16.6	305	121	560	115	1000	244	207	970			TT173#103	0	1.96078	0.273684	4.06852	21.5686	1.55172	204.38	443.85	1200.79	2137.81	3383.69	4509.8	5882.35	9606.3		0.0233714	880
TT173#104	0.218	0.021	0.0337	0.0014	0.0483	0.0047		201	18	213.4	8.5	50	180		11.6	0.21	4.8	8.3	2.73	50	15.5	210	74	318	67	680	120	156	440			TT173#104	0	18.9542	2.21053	10.2784	54.2484	47.069	243.309	414.439	826.772	1307.42	1921.45	2627.45	4000	4724.41		0.409696	213.4
TT173#105	0.321	0.03	0.046	0.0019	0.0509	0.0045		279	23	289	12	150	170		6.2		0.28	0.95	0.028	4.5	3.1	54	21.2	114	22.5	303	50.5	136	508			TT173#105	0	10.1307	0	0.599572	6.20915	0.482759	21.8978	82.8877	212.598	374.558	688.822	882.353	1782.35	1988.19		0.0414013	289
TT173#106	0.234	0.048	0.0323	0.0024	0.054	0.011		202	39	205	15	80	370		7.5		0.57	1.7	0.47	14.6	4	66	28.7	177	45	418	92	50	179			TT173#106	0	12.2549	0	1.22056	11.1111	8.10345	71.0462	106.952	259.843	507.067	1069.49	1764.71	2458.82	3622.05		0.288417	205
TT173#107	0.219	0.011	0.03057	0.00086	0.0525	0.0026		200.5	9.4	194.1	5.4	270	110	0.08	39	0.48	7	9.3	0.09	1300	31.5	400	165	670	142	1320	2300	1110	2750			TT173#107	0.337553	63.7255	5.05263	14.9893	60.7843	1.55172	6326.03	842.246	1574.8	2915.19	4048.34	5568.63	7764.71	90551.2		0.00250238	194.1
TT173#108	0.215	0.037	0.0323	0.0016	0.0469	0.0073		191	29	205	10	10	290		22.3	0.038	6.6	8.6	1.73	57	21.2	271	96	473	97	920	143	185	362			TT173#108	0	36.4379	0.4	14.1328	56.2092	29.8276	277.372	566.845	1066.93	1696.11	2858.01	3803.92	5411.76	5629.92		0.238882	205
TT173#109	0.233	0.025	0.0327	0.0014	0.0519	0.0052		210	20	207.1	8.8	180	200		22	0.2	15	100	1.11	70	100	610	190	620	124	1230	234	1200	930			TT173#109	0	35.9477	2.10526	32.1199	653.595	19.1379	340.633	2673.8	2401.57	3356.89	3746.22	4862.75	7235.29	9212.6		0.04056	207.1
TT173#110	0.239	0.037	0.0322	0.0022	0.059	0.0089		212	29	204	14	320	280	0.11	42	0.18	4.8	14.8	1.3	63	17.5	252	96	355	77	830	138	108	355			TT173#110	0.464135	68.6275	1.89474	10.2784	96.732	22.4138	306.569	467.914	992.126	1696.11	2145.02	3019.61	4882.35	5433.07		0.130156	204
TT173#111	0.228	0.027	0.0332	0.0014	0.0491	0.0054		205	22	210.4	8.9	110	220	55	230	34	86	40	2.6	132	140	770	270	1570	260	3100	610	1700	2700			TT173#111	232.068	375.817	357.895	184.154	261.438	44.8276	642.336	3743.32	3031.5	4770.32	9486.4	10196.1	18235.3	24015.7		0.109391	210.4
TT173#112	1.58	0.12	0.1688	0.0072	0.0683	0.0049		945	49	1004	39	810	150			0.15	1.9	4.2		24	11.6	130	44	207	45	410	69	125	272			TT173#112	0	0	1.57895	4.06852	27.451	0	116.788	310.16	511.811	777.385	1250.76	1764.71	2411.76	2716.54		0	1004
TT173#113	0.295	0.052	0.0415	0.0022	0.0543	0.0092		261	41	262	13	160	300		22		2.4	6.8	0.2	28	11.4	200	90	500	59	570	117	270	450			TT173#113	0	35.9477	0	5.13919	44.4444	3.44828	136.253	304.813	787.402	1590.11	3021.15	2313.73	3352.94	4606.3		0.0443119	262
TT173#114	0.224	0.038	0.0344	0.0021	0.0492	0.0084		204	32	218	13	0	300	12.3	61	7.6	42	20.1	0.52	93	24.6	410	144	640	134	1240	215	310	510			TT173#114	51.8987	99.6732	80	89.9358	131.373	8.96552	452.555	657.754	1614.17	2544.17	3867.07	5254.9	7294.12	8464.57		0.0367695	218
TT206#01	0.314	0.03	0.0463	0.0017	0.0486	0.0044		273	23	292	11	90	180	0.077	9.6	0.068	0.87	0.71	0.28	3.2	1.58	18.8	7.9	35.8	9.6	118	27.8	163	227			TT206#01	0.324895	15.6863	0.715789	1.86296	4.64052	4.82759	15.5718	42.246	74.0157	139.576	216.314	376.471	694.118	1094.49		0.567907	292
TT206#02	1.589	0.058	0.1651	0.0037	0.0696	0.0023		962	22	984	21	905	65				1.9	5.9		51.6	18	221	50.6	155	29.3	238	34.2	72.6	464			TT206#02	0	0	0	4.06852	38.5621	0	251.095	481.283	870.079	893.993	936.556	1149.02	1400	1346.46		0	984
TT206#03	0.304	0.023	0.0435	0.0011	0.0502	0.0034		267	18	274.6	6.7	200	150		22.2		0.73	0.72	0.36	17.7	4.23	63	25.5	120	28.7	379	68.9	204	348			TT206#03	0	36.2745	0	1.56317	4.70588	6.2069	86.1314	113.102	248.031	450.53	725.076	1125.49	2229.41	2712.6		0.3083	274.6
TT206#04	0.329	0.021	0.0435	0.0012	0.0552	0.0038		291	15	274.4	7.3	380	130		30.3		0.42	1.8	0.95	12.8	4.23	57.7	32.8	155	42.8	492	98	279	472			TT206#04	0	49.5098	0	0.899358	11.7647	16.3793	62.2871	113.102	227.165	579.505	936.556	1678.43	2894.12	3858.27		0.605071	274.4
TT206#05	0.673	0.021	0.0847	0.0017	0.0574	0.0014		521	13	524	10	490	56		0.37		0.75	2.5		30.2	12.4	127	41.7	151	34.6	266	45.5	74	917			TT206#05	0	0.604575	0	1.606	16.3399	0	146.959	331.551	500	736.749	912.387	1356.86	1564.71	1791.34		0	524
TT206#06	0.264	0.022	0.0393	0.0021	0.049	0.0032		236	17	248	13	110	130		4.2	0.03	0.56	2.4	0.65	18	7.2	100	40.3	191	47.4	510	83	66	681			TT206#06	0	6.86275	0.315789	1.19914	15.6863	11.2069	87.5912	192.513	393.701	712.014	1154.08	1858.82	3000	3267.72		0.30234	248
TT206#07	0.677	0.021	0.0855	0.002	0.0576	0.0014		524	13	529	12	498	54		0.97	0.05	1.68	3.8		35.7	14.5	191	60.7	264	53	498	85	129	1124			TT206#07	0	1.58497	0.526316	3.59743	24.8366	0	173.723	387.701	751.969	1072.44	1595.17	2078.43	2929.41	3346.46		0	529
TT206#08	0.239	0.013	0.03369	0.00086	0.0516	0.0029		217	10	213.6	5.4	220	120		17.1		0.47	1.8	0.34	18.8	6.1	102	37.4	218	46.6	574	95.7	253	900			TT206#08	0	27.9412	0	1.00642	11.7647	5.86207	91.4842	163.102	401.575	660.777	1317.22	1827.45	3376.47	3767.72		0.178685	213.6
TT206#09	0.294	0.019	0.0406	0.0013	0.0526	0.0033		260	15	256.7	8	260	130		15.1	0.31	3.4	8.8	0.52	44.7	17.4	205	80.6	362	81.3	880	131	317	537			TT206#09	0	24.6732	3.26316	7.28051	57.5163	8.96552	217.518	465.241	807.087	1424.03	2187.31	3188.24	5176.47	5157.48		0.0801552	256.7
TT206#10	0.302	0.027	0.0427	0.0012	0.0517	0.0049		268	22	269.7	7.7	190	180		3.9		1.33	2.6	0.16	22.3	7.9	100	49.9	204	45.2	506	89	75	201			TT206#10	0	6.37255	0	2.84797	16.9935	2.75862	108.516	211.23	393.701	881.625	1232.63	1772.55	2976.47	3503.94		0.0642398	269.7
TT206#11	0.265	0.03	0.0387	0.0016	0.0491	0.0054		234	24	244.4	9.8	80	210		6.8		0.74	2.3	0.063	14.3	4.72	50.7	23.3	90	19.6	203	37	64.8	145			TT206#11	0	11.1111	0	1.58458	15.0327	1.08621	69.5864	126.203	199.606	411.661	543.807	768.627	1194.12	1456.69		0.033584	244.4
TT206#12	0.622	0.031	0.0813	0.0022	0.056	0.0027		492	20	504	13	400	110		11.9	0.067	1.17	4.7	0.2	18.8	6.1	95	32.9	139	27.3	294	53.6	132	404			TT206#12	0	19.4444	0.705263	2.50535	30.719	3.44828	91.4842	163.102	374.016	581.272	839.879	1070.59	1729.41	2110.24		0.0650468	504
TT206#13	0.278	0.019	0.0404	0.0017	0.0506	0.0026		250	14	255	10	190	110		7	0.073	0.97	3.6	0.41	25.4	10.7	166	77	436	104	1190	192	182	1000			TT206#13	0	11.4379	0.768421	2.07709	23.5294	7.06897	123.601	286.096	653.543	1360.42	2634.44	4078.43	7000	7559.06		0.131081	255
TT206#14	0.522	0.026	0.0683	0.0034	0.0555	0.0016		424	18	425	21	425	62	1.44	10.1	1.17	7	5.6	1.23	16.2	6.8	83	38.5	228	61.8	747	130	237	1970			TT206#14	6.07595	16.5033	12.3158	14.9893	36.6013	21.2069	78.8321	181.818	326.772	680.212	1377.64	2423.53	4394.12	5118.11		0.3948	425
TT206#15	0.615	0.015	0.0783	0.0016	0.0568	0.0012		485.8	9.1	486	9.3	470	49		16.9	0.68	10.4	14	0.083	75	29.9	360	128	532	117	1000	155	1080	2190			TT206#15	0	27.6144	7.15789	22.2698	91.5033	1.43103	364.964	799.465	1417.32	2261.48	3214.5	4588.24	5882.35	6102.36		0.00783082	486
TT206#16	0.275	0.016	0.03794	0.00076	0.0523	0.0028		245	13	240	4.7	250	110		56.8	0.063	2.11	4	1.68	21.6	8.5	91	34.5	157	39.4	404	69.7	599	676			TT206#16	0	92.8105	0.663158	4.5182	26.1438	28.9655	105.109	227.273	358.268	609.541	948.64	1545.1	2376.47	2744.09		0.552556	240
TT206#17	0.416	0.017	0.0484	0.0015	0.0618	0.0019		352	12	306.3	9.8	644	65	11.4	77	11.4	64	56.5	20.9	123	39.7	357	83.4	349	68.7	860	123	1240	1640			TT206#17	48.1013	125.817	120	137.045	369.281	360.345	598.54	1061.5	1405.51	1473.5	2108.76	2694.12	5058.82	4842.52		0.766466	306.3
TT206#18	0.315	0.012	0.04438	0.00082	0.0514	0.0021		277.1	9.1	279.9	5.1	249	93	4.22	23	2.21	10.8	5.9	0.2	21.9	10.9	153	54.7	291	73.5	743	115	403	885			TT206#18	17.8059	37.5817	23.2632	23.1263	38.5621	3.44828	106.569	291.444	602.362	966.431	1758.31	2882.35	4370.59	4527.56		0.0537905	279.9
TT206#19	0.287	0.02	0.04128	0.00089	0.0505	0.0035		255	15	260.7	5.5	160	140	9.3	30	3.9	9.3	3.3	0.87	15.2	4.72	54.2	19.7	94.3	24.8	276	42.3	152	423			TT206#19	39.2405	49.0196	41.0526	19.9143	21.5686	15	73.9659	126.203	213.386	348.057	569.789	972.549	1623.53	1665.35		0.375547	260.7
TT206#20	0.23	0.022	0.0336	0.0011	0.0496	0.0049		208	18	213.1	6.6	120	200		6.1	0.27	5	11.6	2.3	63	23.2	270	90	401	97	940	150	128	283			TT206#20	0	9.96732	2.84211	10.7066	75.817	39.6552	306.569	620.321	1062.99	1590.11	2422.96	3803.92	5529.41	5905.51		0.260107	213.1
TT206#21	1.307	0.062	0.1373	0.0045	0.0685	0.0027		843	27	829	25	879	82		0.13		0.51	3.2		27	14.1	191	74	323	67.7	736	102.8	36.1	287			TT206#21	0	0.212418	0	1.09208	20.915	0	131.387	377.005	751.969	1307.42	1951.66	2654.9	4329.41	4047.24		0	829
TT206#22	0.302	0.014	0.04124	0.00095	0.0529	0.0023		267	11	260.5	5.9	292	97	0.92	13.4	0.91	6.4	6.4	0.97	17.2	6.8	80	34.8	176	39.9	436	71.7	278	888			TT206#22	3.88186	21.8954	9.57895	13.7045	41.8301	16.7241	83.6983	181.818	314.961	614.841	1063.44	1564.71	2564.71	2822.83		0.282645	260.5
TT206#23	0.318	0.046	0.0413	0.0017	0.0552	0.0079		271	34	260	10	240	270		3.7	0.31	7.8	13	4.22	58	18.2	154	49.6	193	35.9	392	66.2	65.2	102.1			TT206#23	0	6.04575	3.26316	16.7024	84.9673	72.7586	282.238	486.631	606.299	876.325	1166.16	1407.84	2305.88	2606.3		0.46984	260
TT206#24	1.437	0.094	0.1433	0.0081	0.0719	0.0015		892	40	861	45	973	43		7.6		0.3	1.16	0.044	16.7	7.3	94	42.5	196	49.2	544	87.7	130	963			TT206#24	0	12.4183	0	0.642398	7.5817	0.758621	81.2652	195.187	370.079	750.883	1184.29	1929.41	3200	3452.76		0.0305625	861
TT206#25	0.389	0.027	0.0518	0.0028	0.0538	0.0019		331	20	325	17	354	77	0.048	5.6	0.044	1	1.26	0.28	8.1	5.17	89	36.5	149	35.5	347	57	103	1028			TT206#25	0.202532	9.15033	0.463158	2.14133	8.23529	4.82759	39.4161	138.235	350.394	644.876	900.302	1392.16	2041.18	2244.09		0.26795	325
TT206#26	1.427	0.048	0.148	0.0045	0.0695	0.0016		897	20	889	26	910	49		9.9	0.26	6.4	10	0.18	54.5	17.4	208	76.7	352	73	738	106	352	734			TT206#26	0	16.1765	2.73684	13.7045	65.3595	3.10345	265.207	465.241	818.898	1355.12	2126.89	2862.75	4341.18	4173.23		0.0235721	889
TT206#27	0.537	0.033	0.0684	0.0039	0.0562	0.0014		433	23	426	24	447	55		17	0.049	0.72	2.7	0.41	14.3	4.33	59	28.8	181	43.6	471	78	277	1120			TT206#27	0	27.7778	0.515789	1.54176	17.6471	7.06897	69.5864	115.775	232.283	508.834	1093.66	1709.8	2770.59	3070.87		0.201724	426
TT206#28	0.319	0.036	0.0418	0.0015	0.0554	0.0061		275	27	263.8	9.6	270	220		4.8		0.65		0.31	2.7	1.82	30.8	10.3	48.1	11.4	145	31.8	61.7	104			TT206#28	0	7.84314	0	1.39186	0	5.34483	13.1387	48.6631	121.26	181.979	290.634	447.059	852.941	1251.97		#DIV/0!	263.8
TT206#29	0.295	0.018	0.0413	0.0013	0.0511	0.0027		261	14	260.7	8.3	230	120	12.3	26.2	2.28	8.6	4.9	0.89	32.2	9.5	104	36.7	171	37.9	377	64.2	156	496			TT206#29	51.8987	42.8105	24	18.4154	32.0261	15.3448	156.691	254.011	409.449	648.41	1033.23	1486.27	2217.65	2527.56		0.216615	260.7
TT206#30	0.95	0.1	0.1012	0.0099	0.0664	0.0018		651	57	617	59	800	60	0.1	5.7	0.054	2.2	4.3	0.41	20.6	8.2	136	57.2	338	81	860	146	194	980			TT206#30	0.421941	9.31373	0.568421	4.71092	28.1046	7.06897	100.243	219.251	535.433	1010.6	2042.3	3176.47	5058.82	5748.03		0.13318	617
TT206#31	0.689	0.021	0.0848	0.0016	0.0591	0.0015		533	12	524.6	9.6	553	55		3.4		1.2	2.41	0.12	16.9	7.2	75	28.9	126	27	275	46	293	1176			TT206#31	0	5.55556	0	2.56959	15.7516	2.06897	82.2384	192.513	295.276	510.601	761.329	1058.82	1617.65	1811.02		0.0574848	524.6
TT206#32	0.314	0.054	0.0451	0.0026	0.052	0.01		270	44	284	16	40	340						0.024	1.1	0.53	6.7	3.9	23.5	5.3	71	12.2	8.1	37			TT206#32	0	0	0	0	0	0.413793	5.3528	14.1711	26.378	68.9046	141.994	207.843	417.647	480.315		#DIV/0!	284
TT206#33	0.72	0.1	0.08	0.0097	0.0625	0.0023		522	57	492	57	657	78	0.62	13.3	1.24	5	4.4	1.41	16.1	7.4	90	32.8	150	28.5	303	49.2	129	1290			TT206#33	2.61603	21.732	13.0526	10.7066	28.7582	24.3103	78.3455	197.861	354.331	579.505	906.344	1117.65	1782.35	1937.01		0.512157	492
TT206#34	1.436	0.077	0.1512	0.0068	0.0687	0.0024		895	34	906	39	860	73		5.1	0.015	0.52	3.1		18.3	7.2	103	45.8	199	43.9	465	70.3	157	433			TT206#34	0	8.33333	0.157895	1.11349	20.2614	0	89.0511	192.513	405.512	809.187	1202.42	1721.57	2735.29	2767.72		0	906
TT206#35	0.301	0.02	0.0401	0.0012	0.0549	0.0041		265	15	253.7	7.2	320	150	6.3	211	2.7	17.9	17.8	5.23	66	24.4	295	94	450	89	865	144	368	314			TT206#35	26.5823	344.771	28.4211	38.3298	116.34	90.1724	321.168	652.406	1161.42	1660.78	2719.03	3490.2	5088.24	5669.29		0.466491	253.7
TT206#36	1.254	0.063	0.1284	0.005	0.0702	0.0019		818	29	778	29	916	56	1.98	75	1.27	11.5	11.1	3.8	29.7	9.8	118	48.2	240	53.9	610	125	483	836			TT206#36	8.35443	122.549	13.3684	24.6253	72.549	65.5172	144.526	262.032	464.567	851.59	1450.15	2113.73	3588.24	4921.26		0.639834	778
TT206#37	0.307	0.021	0.0428	0.0015	0.0521	0.0031		270	16	270.1	9.4	240	130		6.3	0.11	1.31	2.4	0.44	13.1	5.8	82	32	186	42.8	479	91	133	647			TT206#37	0	10.2941	1.15789	2.80514	15.6863	7.58621	63.747	155.08	322.835	565.371	1123.87	1678.43	2817.65	3582.68		0.239903	270.1
TT206#38	0.636	0.02	0.0812	0.0021	0.0572	0.0015		499	12	503	13	479	60	0.11	12.7	0.47	3.8	6.3	0.79	37.4	10.9	128	46.9	231	45.8	456	82.4	625	1200			TT206#38	0.464135	20.7516	4.94737	8.13704	41.1765	13.6207	181.995	291.444	503.937	828.622	1395.77	1796.08	2682.35	3244.09		0.157342	503
TT206#39	0.217	0.019	0.0298	0.001	0.0526	0.0046		198	16	189.2	6.3	270	190	0.79	3.7	0.66	2.3	2	0.91	5.1	3.6	47	15.5	68	17.1	193	42.1	109	697			TT206#39	3.33333	6.04575	6.94737	4.92505	13.0719	15.6897	24.8175	96.2567	185.039	273.852	410.876	670.588	1135.29	1657.48		0.871094	189.2
TT206#40	0.239	0.014	0.03268	0.00074	0.0522	0.003		216	11	207.2	4.6	260	120	0.099	25.7	0.45	5.9	14.3	1.16	79	25.6	329	123	571	94	920	165	357	716			TT206#40	0.417722	41.9935	4.73684	12.6338	93.4641	20	384.428	684.492	1295.28	2173.14	3450.15	3686.27	5411.76	6496.06		0.105512	207.2
TT206#41	0.636	0.018	0.0812	0.0014	0.057	0.0016		499	11	503.2	8.1	471	61		20.4	0.24	4.5	7.8	0.24	35.2	10.4	128	37.3	180	35.2	375	63.8	427	1130			TT206#41	0	33.3333	2.52632	9.63597	50.9804	4.13793	171.29	278.075	503.937	659.011	1087.61	1380.39	2205.88	2511.81		0.0442809	503.2
TT206#42	0.605	0.047	0.0803	0.002	0.0555	0.0045		479	31	497	12	330	170		6.4		0.59	0.95	0.74	3.7	2.13	22.6	9.8	41.8	10.7	140	31.7	84.9	122.6			TT206#42	0	10.4575	0	1.26338	6.20915	12.7586	18.0049	56.9519	88.9764	173.145	252.568	419.608	823.529	1248.03		1.20668	497
TT206#43	0.2561	0.0092	0.03617	0.00081	0.0514	0.0019		231.1	7.5	229	5	234	80	0.24	112	2.24	32.2	53.2	17.3	211	54.8	574	184	756	140	1330	235	2270	1448			TT206#43	1.01266	183.007	23.5789	68.9507	347.712	298.276	1026.76	1465.24	2259.84	3250.88	4567.98	5490.2	7823.53	9251.97		0.499198	229
TT206#44	0.354	0.016	0.0442	0.0017	0.0579	0.0024		306	12	279	11	501	97	1.74	15.8	1.48	16.1	24.3	11.4	82	23.6	202	47.6	201	36.3	353	62.1	296	920			TT206#44	7.34177	25.817	15.5789	34.4754	158.824	196.552	399.027	631.016	795.276	840.989	1214.5	1423.53	2076.47	2444.88		0.780762	279
TT206#45	0.41	0.042	0.0529	0.0035	0.0562	0.0042		341	30	332	22	370	160		19.3	0.104	1.37	4.9	1.88	23.9	10.1	110	50.6	253	54.2	550	109	79.5	287			TT206#45	0	31.5359	1.09474	2.93362	32.0261	32.4138	116.302	270.053	433.071	893.993	1528.7	2125.49	3235.29	4291.34		0.53111	332
TT206#46	0.322	0.011	0.04205	0.00099	0.0557	0.0018		282.6	8.8	265.5	6.1	415	71	9.7	43	7.4	49	49	14.4	98	35.8	297	90	390	78.7	960	177	1110	2250			TT206#46	40.9283	70.2614	77.8947	104.925	320.261	248.276	476.886	957.219	1169.29	1590.11	2356.5	3086.27	5647.06	6968.5		0.635294	265.5
TT206#47	0.256	0.025	0.0362	0.0011	0.0521	0.0054		228	20	229.4	7.1	170	200		8.2			0.18		4.5	2.01	40.5	15.8	77	16.5	179	34.5	43.5	206			TT206#47	0	13.3987	0	0	1.17647	0	21.8978	53.7433	159.449	279.152	465.257	647.059	1052.94	1358.27		0	229.4
TT206#48	0.406	0.033	0.0526	0.0037	0.055	0.002		346	25	330	23	398	84			0.018	0.08	0.71	0.41	2	3.6	67	29.6	132	26.2	266	48.7	24.3	1300			TT206#48	0	0	0.189474	0.171306	4.64052	7.06897	9.73236	96.2567	263.78	522.968	797.583	1027.45	1564.71	1917.32		1.05187	330
TT206#49	0.307	0.053	0.038	0.0017	0.059	0.01		263	41	240	11	330	350		24.1	0.068	3.1	4.9	2.1	25.1	8.7	114	43.5	204	38.9	417	78	92	72			TT206#49	0	39.3791	0.715789	6.63812	32.0261	36.2069	122.141	232.62	448.819	768.551	1232.63	1525.49	2452.94	3070.87		0.578906	240
TT206#50	0.348	0.019	0.0463	0.0015	0.0541	0.0029		302	14	291.7	8.9	320	110	0.06	13.2	0.47	6.6	11.2	0.23	71	21.4	239	97	392	82	719	132	219	580			TT206#50	0.253165	21.5686	4.94737	14.1328	73.2026	3.96552	345.499	572.193	940.945	1713.78	2368.58	3215.69	4229.41	5196.85		0.0249352	291.7
TT206#51	0.295	0.017	0.04133	0.00092	0.0512	0.0029		261	13	261	5.7	230	130		10.2		1.31	3.7	0.13	19.1	9.1	125	48.8	238	46.4	482	87	171	491			TT206#51	0	16.6667	0	2.80514	24.183	2.24138	92.944	243.316	492.126	862.191	1438.07	1819.61	2835.29	3425.2		0.0472769	261
TT206#52	0.289	0.019	0.0397	0.001	0.0532	0.0036		256	15	251	6.3	260	130		8.2	0.069	1.47	4.2	0.21	20.6	6.4	87	43.4	188	36.7	418	77	302	495			TT206#52	0	13.3987	0.726316	3.14775	27.451	3.62069	100.243	171.123	342.52	766.784	1135.95	1439.22	2458.82	3031.5		0.0690215	251
TT206#53	0.296	0.015	0.04045	0.00074	0.0532	0.0025		263	12	255.6	4.6	300	100		47.2	0.61	14.1	25.2	3.67	168	66.7	715	270	1040	205	1740	293	1210	1180			TT206#53	0	77.1242	6.42105	30.1927	164.706	63.2759	817.518	1783.42	2814.96	4770.32	6283.99	8039.22	10235.3	11535.4		0.172439	255.6
TT206#54	0.672	0.02	0.0855	0.0016	0.0569	0.0017		521	12	529	9.6	478	68				0.33	2.04		18	11.5	139	49.1	200	38.1	378	64	64.7	1040			TT206#54	0	0	0	0.706638	13.3333	0	87.5912	307.487	547.244	867.491	1208.46	1494.12	2223.53	2519.69		0	529
TT206#55	0.229	0.027	0.032	0.0015	0.052	0.006		206	22	203	9.3	180	230						0.13	1.3	1.87	20.4	4.9	16.9	2.4	18.2	3.1	2.2	183			TT206#55	0	0	0	0	0	2.24138	6.32603	50	80.315	86.5724	102.115	94.1176	107.059	122.047		#DIV/0!	203
TT206#56	0.244	0.014	0.0344	0.0011	0.0521	0.0031		220	12	218.2	6.8	240	130	1.18	9.3	0.64	3.9	2.5	1.31	9.9	4.6	62	24.4	139	32.7	355	60.7	136	539			TT206#56	4.9789	15.1961	6.73684	8.35118	16.3399	22.5862	48.1752	122.995	244.094	431.095	839.879	1282.35	2088.24	2389.76		0.805021	218.2
TT206#57	0.266	0.013	0.0307	0.0011	0.0636	0.0026		239	10	194.6	6.8	688	89	10	76	10	54	45.4	15.4	96	28.2	242	70.1	323	83	890	173	1260	1440			TT206#57	42.1941	124.183	105.263	115.632	296.732	265.517	467.153	754.011	952.756	1238.52	1951.66	3254.9	5235.29	6811.02		0.71315	194.6
TT206#58	0.219	0.012	0.03188	0.00075	0.0502	0.0022		200.5	9.6	202.3	4.7	176	94	0.15	19.8	0.44	4.8	6.9	1.12	45	18	210	78.2	372	76	741	130	210	970			TT206#58	0.632911	32.3529	4.63158	10.2784	45.098	19.3103	218.978	481.283	826.772	1381.63	2247.73	2980.39	4358.82	5118.11		0.194317	202.3
TT206#59	0.237	0.016	0.03468	0.00071	0.0494	0.0033		217	14	219.8	4.4	150	150		5.2	0.11	1.7	4.1	0.17	51	16.2	198	84	391	71	730	133	183	526			TT206#59	0	8.49673	1.15789	3.64026	26.7974	2.93103	248.175	433.155	779.528	1484.1	2362.54	2784.31	4294.12	5236.22		0.0359414	219.8
TT206#60	0.579	0.032	0.0738	0.0026	0.0564	0.0028		461	20	459	16	430	110	0.18	14.2	0.101	4.9	7.6	1.45	39	11.4	142	48.5	222	38	399	77.7	202	413			TT206#60	0.759494	23.2026	1.06316	10.4925	49.6732	25	189.781	304.813	559.055	856.89	1341.39	1490.2	2347.06	3059.06		0.257485	459
TT206#61	0.289	0.012	0.03957	0.0008	0.0534	0.0024		256.9	9.1	250.1	5	311	97		13.8	0.035	1.9	4.2	0.52	17.6	7.4	106	44.8	219	44.7	480	91.2	276	621			TT206#61	0	22.549	0.368421	4.06852	27.451	8.96552	85.6448	197.861	417.323	791.519	1323.26	1752.94	2823.53	3590.55		0.184904	250.1
TT206#62	0.699	0.024	0.0849	0.0015	0.0595	0.002		537	14	525.3	8.7	558	76	1.87	11.2	0.57	3.6	3	0.52	8.4	5.1	68	33.1	184	41.8	444	114	225	1270			TT206#62	7.8903	18.3007	6	7.70878	19.6078	8.96552	40.8759	136.364	267.717	584.806	1111.78	1639.22	2611.76	4488.19		0.316684	525.3
TT206#63	0.307	0.033	0.043	0.0043	0.0523	0.002		267	25	271	26	272	83	5.5	5.3	1.72	9.3	6.8	1.9	30.8	11.4	113	30.2	73	11	113	20.6	91	1900			TT206#63	23.2068	8.66013	18.1053	19.9143	44.4444	32.7586	149.878	304.813	444.882	533.569	441.088	431.373	664.706	811.024		0.401372	271
TT206#64	0.309	0.024	0.0429	0.0013	0.052	0.0037		270	18	270.4	8.3	220	150		17.4	0.034	1.2	1.04	1.17	12.5	4.4	68	28.2	128	31.6	372	74.8	172	306			TT206#64	0	28.4314	0.357895	2.56959	6.79739	20.1724	60.8273	117.647	267.717	498.233	773.414	1239.22	2188.24	2944.88		0.99206	270.4
TT206#65	0.304	0.022	0.0369	0.0013	0.0593	0.0033		267	16	233.7	7.8	510	120	1.88	22.7	1.63	9.8	10.9	2.81	33.2	13.1	142	54.7	290	62.4	607	113	531	1090			TT206#65	7.93249	37.0915	17.1579	20.985	71.2418	48.4483	161.557	350.267	559.055	966.431	1752.27	2447.06	3570.59	4448.82		0.451593	233.7
TT206#66	0.301	0.015	0.04136	0.00095	0.0525	0.0025		266	12	261.2	5.9	290	110	37	120	10.6	62	14.9	0.59	45	11.1	135	58	255	48	544	119	378	780			TT206#66	156.118	196.078	111.579	132.762	97.3856	10.1724	218.978	296.791	531.496	1024.73	1540.79	1882.35	3200	4685.04		0.0696588	261.2
TT206#67	0.494	0.045	0.0641	0.0021	0.0561	0.0052		400	30	400	12	330	190		3.5		1.5	2.7	0.38	23.2	6.7	88	33.1	149	27	261	54.4	98	259			TT206#67	0	5.71895	0	3.21199	17.6471	6.55172	112.895	179.144	346.457	584.806	900.302	1058.82	1535.29	2141.73		0.146785	400
TT206#68	0.328	0.02	0.04409	0.00096	0.054	0.0034		286	15	278.1	5.9	310	130		14.3	0.081	1.7	4.8	0.14	27.2	8.9	117	42.1	229	43.4	447	91	254	558			TT206#68	0	23.366	0.852632	3.64026	31.3725	2.41379	132.36	237.968	460.63	743.816	1383.69	1701.96	2629.41	3582.68		0.0374582	278.1
TT206#69	0.296	0.018	0.0421	0.0012	0.0514	0.0033		261	14	266	7.6	200	130		12	0.119	1.5	2.9	0.18	19.2	5.3	96	39.1	192	41.3	451	87	240	654			TT206#69	0	19.6078	1.25263	3.21199	18.9542	3.10345	93.4307	141.711	377.953	690.813	1160.12	1619.61	2652.94	3425.2		0.0737474	266
TT206#70	0.656	0.06	0.0834	0.0053	0.0558	0.0038		501	38	515	32	400	160	34	83	6.5	35	7.9	0.86	24.5	7.9	62	29.1	135	26.9	307	66	135	293			TT206#70	143.46	135.621	68.4211	74.9465	51.634	14.8276	119.221	211.23	244.094	514.134	815.71	1054.9	1805.88	2598.43		0.188984	515
TT206#71	0.741	0.045	0.0892	0.0036	0.0605	0.0028		562	27	550	21	577	98		3.5		0.56	0.66	0.43	7.9	5.7	87	40.8	185	45.3	491	120	63	605			TT206#71	0	5.71895	0	1.19914	4.31373	7.41379	38.4428	152.406	342.52	720.848	1117.82	1776.47	2888.24	4724.41		0.575714	550
TT206#72	0.39	0.13	0.043	0.0048	0.066	0.025		275	86	271	29	-240	580		2.8		2.2	2.3	1.46	17.4	4	50.7	15.2	61.2	17	120	34	6.2	19.6			TT206#72	0	4.57516	0	4.71092	15.0327	25.1724	84.6715	106.952	199.606	268.551	369.789	666.667	705.882	1338.58		0.705566	271
TT206#73	0.57	0.029	0.0757	0.0019	0.0546	0.0029		458	18	470	12	370	110		0.72			2.3	0.14	15.6	7.4	64	22	86	11.8	104	15	101	800			TT206#73	0	1.17647	0	0	15.0327	2.41379	75.9124	197.861	251.969	388.693	519.637	462.745	611.765	590.551		0.0714538	470
TT206#74	0.225	0.014	0.032	0.00091	0.0508	0.0032		208	13	203	5.7	220	140	3.6	39	4	24	17.6	5.3	50	14.2	113	35.5	164	31.5	390	65	440	1320			TT206#74	15.1899	63.7255	42.1053	51.3919	115.033	91.3793	243.309	379.679	444.882	627.208	990.937	1235.29	2294.12	2559.06		0.546208	203
TT206#75	0.572	0.04	0.0703	0.0017	0.059	0.0041		454	26	438	10	480	150		7.9			0.68		4.2	2.51	34	12.6	68	17.4	200	51	101	348			TT206#75	0	12.9085	0	0	4.44444	0	20.438	67.1123	133.858	222.615	410.876	682.353	1176.47	2007.87		0	438
TT206#76	0.529	0.04	0.0679	0.003	0.0555	0.0029		426	26	423	18	380	110		9.4		0.11	1.27		17.1	3.4	65	34.1	175	43.4	538	102	135	597			TT206#76	0	15.3595	0	0.235546	8.30065	0	83.2117	90.9091	255.906	602.473	1057.4	1701.96	3164.71	4015.75		0	423
TT206#77	0.517	0.03	0.0695	0.0025	0.0537	0.0023		420	20	433	15	319	94		6.2	0.073	2.4	3.7	0.29	19.5	9	108	44.3	185	39.7	386	73	279	1050			TT206#77	0	10.1307	0.768421	5.13919	24.183	5	94.8905	240.642	425.197	782.686	1117.82	1556.86	2270.59	2874.02		0.104377	433
TT206#78	0.249	0.012	0.03593	0.00074	0.0501	0.0022		224.9	9.9	227.5	4.6	171	94	0.97	25.8	1.21	12.4	12.7	2.34	60	21.2	245	86	385	76	740	139	1150	1810			TT206#78	4.09283	42.1569	12.7368	26.5525	83.0065	40.3448	291.971	566.845	964.567	1519.43	2326.28	2980.39	4352.94	5472.44		0.259156	227.5
TT206#79	0.517	0.027	0.0658	0.0028	0.0571	0.0023		420	18	410	17	464	91		8.1		2.3	1.9	0.44	18.8	8.8	78	28.8	133	31.5	301	68	207	840			TT206#79	0	13.2353	0	4.92505	12.4183	7.58621	91.4842	235.294	307.087	508.834	803.625	1235.29	1770.59	2677.17		0.225072	410
TT206#80	0.642	0.041	0.0813	0.0025	0.0576	0.0033		498	26	503	15	450	130		9.1	0.076	1.8	6.7	0.48	35.1	11.2	117	50.6	204	39.1	394	76	188	410			TT206#80	0	14.8693	0.8	3.85439	43.7908	8.27586	170.803	299.465	460.63	893.993	1232.63	1533.33	2317.65	2992.13		0.0956916	503
TT206#81	0.584	0.036	0.072	0.0037	0.0583	0.0019		462	24	447	22	514	74		1.9	0.022	0.11	2	0.24	10.1	4.6	86	38.4	182	39.8	337	60.8	135	1220			TT206#81	0	3.10458	0.231579	0.235546	13.0719	4.13793	49.1484	122.995	338.583	678.445	1099.7	1560.78	1982.35	2393.7		0.163252	447
TT206#82	0.233	0.013	0.03438	0.00087	0.0496	0.0031		212	11	217.9	5.4	160	130		16.6		1	2.4	0.11	28.2	10.9	136	58.3	281	66.5	638	141	310	705			TT206#82	0	27.1242	0	2.14133	15.6863	1.89655	137.226	291.444	535.433	1030.04	1697.89	2607.84	3752.94	5551.18		0.0408777	217.9
TT206#83	0.325	0.082	0.0492	0.0035	0.046	0.012		253	61	309	21	-230	420					1.7	1.04	13.9	4.9	47	16.2	85	16.7	160	37.7	7	36			TT206#83	0	0	0	0	11.1111	17.931	67.6399	131.016	185.039	286.219	513.595	654.902	941.176	1484.25		0.654071	309
TT206#84	0.252	0.018	0.03007	0.00089	0.0608	0.0041		226	15	190.9	5.6	570	140	0.022	0.5				0.12	3.2	2.13	28.1	12.7	82	26.2	276	58	22.5	607			TT206#84	0.092827	0.816993	0	0	0	2.06897	15.5718	56.9519	110.63	224.382	495.468	1027.45	1623.53	2283.46		#DIV/0!	190.9
TT206#85	0.652	0.034	0.0806	0.002	0.0586	0.003		506	21	500	12	500	110					1.8	0.08	18.9	6.9	102	42.9	228	47.6	560	134	22.1	398			TT206#85	0	0	0	0	11.7647	1.37931	91.9708	184.492	401.575	757.951	1377.64	1866.67	3294.12	5275.59		0.0419321	500
TT206#86	0.283	0.025	0.043	0.0018	0.0485	0.0043		250	20	271	11	80	180		10	0.02	3.4	5.8	1	24.6	9.8	121	50.2	206	48.1	453	87	120	339			TT206#86	0	16.3399	0.210526	7.28051	37.9085	17.2414	119.708	262.032	476.378	886.926	1244.71	1886.27	2664.71	3425.2		0.255942	271
TT206#87	0.418	0.046	0.0565	0.0047	0.0536	0.0039		352	34	359	30	270	150		2		0.97	2.9	0.028	15.9	6.6	86	34.7	189	47.5	509	105	63	433			TT206#87	0	3.26797	0	2.07709	18.9542	0.482759	77.3723	176.471	338.583	613.074	1141.99	1862.75	2994.12	4133.86		0.0126062	359
TT206#88	0.27	0.03	0.0356	0.0011	0.0559	0.0067		238	24	225.2	7	270	240		3.1		0.19	1.4	0.21	23.7	6.3	80	38.4	213	44.2	399	91	77	264			TT206#88	0	5.06536	0	0.406852	9.15033	3.62069	115.328	168.449	314.961	678.445	1287.01	1733.33	2347.06	3582.68		0.111456	225.2
TT206#89	0.343	0.025	0.047	0.0025	0.0531	0.0029		296	19	296	16	330	110		13.6		1.29	1.8	0.13	16.8	12.5	141	76	320	80	900	190	184	1350			TT206#89	0	22.2222	0	2.76231	11.7647	2.24138	81.7518	334.225	555.118	1342.76	1933.53	3137.25	5294.12	7480.31		0.072273	296
TT206#90	0.258	0.023	0.0377	0.0014	0.0497	0.0046		230	18	238.5	8.4	100	180		14.6		0.46	2.8	0.039	21.2	7.6	110	51.1	219	46.3	461	92	75	285			TT206#90	0	23.8562	0	0.985011	18.3007	0.672414	103.163	203.209	433.071	902.827	1323.26	1815.69	2711.76	3622.05		0.0154754	238.5
TT206#91	0.267	0.026	0.0348	0.0014	0.0556	0.0055		238	20	220.4	8.9	390	210	0.17	3.8	0.22	2.4	2.1	0.31	8	4.3	48	13.1	55	14	134	30.9	72	547			TT206#91	0.7173	6.20915	2.31579	5.13919	13.7255	5.34483	38.9294	114.973	188.976	231.449	332.326	549.02	788.235	1216.54		0.231223	220.4
TT206#92	0.265	0.016	0.037	0.0011	0.051	0.0024		237	13	234.4	6.6	230	110		19.1		2.5	3.2	0.64	16.3	5.7	72	36.3	177	41.7	401	80	439	1220			TT206#92	0	31.2092	0	5.35332	20.915	11.0345	79.3187	152.406	283.465	641.343	1069.49	1635.29	2358.82	3149.61		0.270916	234.4
TT206#93	0.449	0.028	0.0609	0.0027	0.0539	0.003		374	19	381	16	340	110		3.6	0.017	0.5	2.8	0.49	12	6.1	58	22.7	117	21.6	181	36.5	109	549			TT206#93	0	5.88235	0.178947	1.07066	18.3007	8.44828	58.3942	163.102	228.346	401.06	706.949	847.059	1064.71	1437.01		0.258434	381
TT206#94	0.321	0.024	0.0424	0.0022	0.0562	0.004		280	18	267	14	370	150	0.07	2.9				0.09	5.6	3.48	39.7	12.3	52	8.7	80	15.8	35.1	662			TT206#94	0.295359	4.73856	0	0	0	1.55172	27.2506	93.0481	156.299	217.314	314.199	341.176	470.588	622.047		#DIV/0!	267
TT206#95	0.258	0.018	0.0358	0.0014	0.0524	0.0028		234	15	226.6	8.8	250	110	4.5	18.2	3.86	20.1	20.4	5.3	42.4	14.9	149	53	276	64	730	151	387	1210			TT206#95	18.9873	29.7386	40.6316	43.0407	133.333	91.3793	206.326	398.396	586.614	936.396	1667.67	2509.8	4294.12	5944.88		0.550936	226.6
TT206#96	0.247	0.019	0.0364	0.0013	0.0495	0.0042		222	16	230.3	8.1	110	160		10.2		0.37	1.72	0.64	13.9	5.7	79	32.9	182	42.8	460	113	138	521			TT206#96	0	16.6667	0	0.792291	11.2418	11.0345	67.6399	152.406	311.024	581.272	1099.7	1678.43	2705.88	4448.82		0.400158	230.3
TT206#97	0.689	0.025	0.0811	0.0015	0.0609	0.0019		530	15	502.8	8.9	624	71		1.6		1.1	3.5		45	17.8	214	73	266	58	400	60	138	1250			TT206#97	0	2.61438	0	2.35546	22.8758	0	218.978	475.936	842.52	1289.75	1607.25	2274.51	2352.94	2362.2		0	502.8
TT206#98	0.229	0.019	0.0331	0.0011	0.0503	0.0039		207	15	209.9	6.8	150	160	1.6	21.1	1.05	8.9	11.5	0.22	69	24.2	268	92	434	79	710	132	310	661			TT206#98	6.75105	34.4771	11.0526	19.0578	75.1634	3.7931	335.766	647.059	1055.12	1625.44	2622.36	3098.04	4176.47	5196.85		0.0238766	209.9
TT206#99	0.231	0.022	0.032	0.0012	0.0539	0.0054		208	18	203	7.7	250	200								0.99	23.5	10.4	53	6.6	101	17.8	1.74	342			TT206#99	0	0	0	0	0	0	0	26.4706	92.5197	183.746	320.242	258.824	594.118	700.787		#DIV/0!	203
TT206#100	1.384	0.036	0.1393	0.0022	0.0721	0.0016		880	15	841	12	977	46		9.6	0.015	2.3	4.9	0.39	30.9	15.6	182	82	351	73	635	133	421	1160			TT206#100	0	15.6863	0.157895	4.92505	32.0261	6.72414	150.365	417.112	716.535	1448.76	2120.85	2862.75	3735.29	5236.22		0.0968971	841
TT206#101	1.108	0.057	0.1189	0.0049	0.0672	0.0019		751	29	723	28	823	61	0.19	4.3	0.27	1.8	4.6	1.56	41	19.8	269	98	459	115	900	183	202	880			TT206#101	0.801688	7.02614	2.84211	3.85439	30.0654	26.8966	199.513	529.412	1059.06	1731.45	2773.41	4509.8	5294.12	7204.72		0.347278	723
TT206#102	0.565	0.036	0.0708	0.0035	0.0579	0.0029		450	23	441	21	470	110		12.9		0.94	2.1	0.041	28.3	8.6	114	52	242	62	491	103	209	557			TT206#102	0	21.0784	0	2.01285	13.7255	0.706897	137.713	229.947	448.819	918.728	1462.24	2431.37	2888.24	4055.12		0.0162594	441
TT206#103	1.69	0.17	0.1681	0.0092	0.0736	0.0059		986	62	999	51	900	170		11.5	0.053	0.11	2.5	0.09	15.1	5.3	75	26	134	26.5	278	53.2	9	176			TT206#103	0	18.7908	0.557895	0.235546	16.3399	1.55172	73.4793	141.711	295.276	459.364	809.668	1039.22	1635.29	2094.49		0.0447824	999
TT206#104	0.401	0.016	0.0516	0.0012	0.0565	0.0025		341	12	324.4	7.4	432	93	1.11	7.9	0.71	4.1	5.6	1.23	23.8	11.9	130	53	266	75	688	133	242	1130			TT206#104	4.68354	12.9085	7.47368	8.77944	36.6013	21.2069	115.815	318.182	511.811	936.396	1607.25	2941.18	4047.06	5236.22		0.325721	324.4
TT206#105	0.282	0.035	0.041	0.002	0.0506	0.006		252	29	259	12	130	230						0.29	2.4	1.23	18.6	12.5	55	13.4	141	35	14.7	203			TT206#105	0	0	0	0	0	5	11.6788	32.8877	73.2283	220.848	332.326	525.49	829.412	1377.95		#DIV/0!	259
TT206#106	0.313	0.013	0.0413	0.0013	0.0552	0.0024		276	10	260.9	8	382	92	5.6	41	3.7	27	24.5	8.2	115	37	440	151	570	109	960	167	1060	2140			TT206#106	23.6287	66.9935	38.9474	57.8158	160.131	141.379	559.611	989.305	1732.28	2667.84	3444.11	4274.51	5647.06	6574.8		0.472286	260.9
TT206#107	0.432	0.019	0.0586	0.0012	0.054	0.0026		363	14	367.3	7.1	330	100	4.3	27.6	0.26	3.4	7.5	1.71	50	21.3	314	143	590	140	1450	275	510	1330			TT206#107	18.1435	45.098	2.73684	7.28051	49.0196	29.4828	243.309	569.519	1236.22	2526.5	3564.95	5490.2	8529.41	10826.8		0.269963	367.3
TT206#108	0.6	0.03	0.0748	0.0018	0.058	0.0027		474	19	465	11	484	99		3.6	0.076	3.6	8.1		35	7	58	12.5	22.5	3.4	25.3	3.2	305	710			TT206#108	0	5.88235	0.8	7.70878	52.9412	0	170.316	187.166	228.346	220.848	135.952	133.333	148.824	125.984		0	465
TT206#109	0.216	0.021	0.0291	0.0011	0.0542	0.0051		196	17	185	6.6	300	190							0.34	0.88	6.5	2.3	8.5	0.6	14.8	2.2	3.5	500			TT206#109	0	0	0	0	0	0	1.6545	23.5294	25.5906	40.636	51.3595	23.5294	87.0588	86.6142		#DIV/0!	185
TT206#110	0.286	0.014	0.0388	0.001	0.0534	0.0026		254	11	245.4	6.2	310	110	2.49	23.8	1.64	8.1	8.8	1.72	26.4	10	104	37.8	216	47.9	549	99	568	1240			TT206#110	10.5063	38.8889	17.2632	17.3448	57.5163	29.6552	128.467	267.38	409.449	667.845	1305.14	1878.43	3229.41	3897.64		0.344992	245.4
TT206#111	0.252	0.014	0.0342	0.001	0.0534	0.0032		227	11	217	6.3	310	130	1.53	9.1	1.11	8	3.1	1.24	15.4	4.8	67	29.7	161	41.9	421	90	175	940			TT206#111	6.4557	14.8693	11.6842	17.1306	20.2614	21.3793	74.9392	128.342	263.78	524.735	972.81	1643.14	2476.47	3543.31		0.548661	217
TT206#112	0.34	0.026	0.0446	0.0029	0.0582	0.004		299	21	281	18	460	150	0.12	6.5	0.058	1.19	0.8	0.031	8.1	2.07	45	25	165	45.2	483	98	133	652			TT206#112	0.506329	10.6209	0.610526	2.54818	5.22876	0.534483	39.4161	55.3476	177.165	441.696	996.979	1772.55	2841.18	3858.27		0.0372304	281
Dating results of standards (PleŠovice).
PLE#01	0.399	0.023	0.0533	0.0014	0.014983	0.0542	0.0035	339	17	334.8	8.7	320	140
PLE#02	0.393	0.02	0.0529	0.0013	0.36651	0.0543	0.0029	338	16	332	8	330	120
PLE#03	0.383	0.017	0.0539	0.0011	0.094675	0.0517	0.0025	328	13	338.3	6.9	240	100
PLE#04	0.379	0.018	0.05268	0.00093	0.33337	0.0518	0.0024	325	14	330.9	5.7	240	100
PLE#05	0.404	0.022	0.0539	0.0011	0.21337	0.0541	0.0028	345	16	338.5	6.6	340	120
PLE#06	0.394	0.021	0.0537	0.0014	0.32081	0.0539	0.0029	336	15	337.1	8.3	330	120
PLE#07	0.403	0.023	0.0543	0.0012	0.037795	0.0541	0.0033	342	16	342	7.1	310	130
PLE#08	0.395	0.019	0.05343	0.00098	0.068837	0.0542	0.003	336	14	335.5	6	320	120
PLE#09	0.4	0.023	0.0538	0.0011	0.31472	0.0543	0.003	342	17	337.7	6.6	330	120
PLE#10	0.388	0.023	0.0545	0.0013	0.24689	0.0515	0.0028	330	17	341.7	7.8	220	120
PLE#11	0.386	0.019	0.0533	0.0011	0.13376	0.0525	0.0026	333	14	334.8	6.8	290	110
PLE#12	0.398	0.02	0.0537	0.0011	0.24715	0.0535	0.0027	338	15	337.2	6.4	300	110
PLE#13	0.401	0.026	0.0538	0.0012	0.1917	0.0539	0.0036	340	19	337.9	7.2	310	140
PLE#14	0.377	0.023	0.053	0.0013	0.33322	0.0514	0.0029	324	17	332.9	8.2	230	130
PLE#15	0.403	0.024	0.0542	0.0014	0.17415	0.0555	0.0039	342	17	339.9	8.8	380	150
PLE#16	0.39	0.022	0.0547	0.0011	0.057388	0.0509	0.0028	333	16	343.1	6.4	220	120
PLE#17	0.406	0.027	0.054	0.0014	0.57844	0.0549	0.0033	343	19	338.7	8.6	350	130
PLE#18	0.409	0.02	0.0546	0.00097	0.059958	0.0543	0.0029	347	15	342.7	5.9	330	120
PLE#19	0.392	0.023	0.0538	0.0011	0.26808	0.0526	0.003	334	17	337.8	6.7	270	130
PLE#20	0.386	0.021	0.0547	0.0013	0.17437	0.0518	0.0029	330	15	343.2	7.7	270	130
PLE#21	0.386	0.022	0.0532	0.0011	0.053337	0.0518	0.0029	329	16	334.2	6.8	280	130
PLE#22	0.381	0.023	0.0542	0.0014	0.06764	0.0514	0.0034	326	17	340	8.3	230	140
PLE#23	0.393	0.024	0.054	0.0016	0.11766	0.0531	0.0034	335	17	338.8	9.9	280	140
PLE#24	0.405	0.022	0.0539	0.0015	0.29227	0.055	0.003	347	16	338.4	9	350	110
PLE#25	0.414	0.025	0.0538	0.0015	0.1292	0.057	0.004	350	18	337.4	9.4	420	140
PLE#26	0.411	0.025	0.0536	0.0013	0.26599	0.0565	0.0037	347	18	336.4	8.2	420	130
PLE#27	0.398	0.021	0.0539	0.0013	0.37247	0.0538	0.0027	344	17	338.1	7.7	340	110
PLE#28	0.404	0.021	0.0535	0.0012	0.10578	0.0549	0.0029	343	15	336.2	7.5	350	120
PLE#29	0.405	0.02	0.0541	0.0012	0.18879	0.0545	0.0026	344	14	339.5	7.2	350	100
PLE#30	0.383	0.019	0.0535	0.0011	0.28422	0.0519	0.0025	330	13	336.2	6.5	250	110
PLE#31	0.405	0.017	0.0546	0.001	0.29427	0.0534	0.0021	345	12	342.9	6.1	326	86
PLE#32	0.393	0.017	0.05452	0.00095	0.3532	0.0519	0.0021	336	12	342.2	5.8	255	88
PLE#33	0.39	0.013	0.0544	0.001	0.29212	0.0522	0.002	336	11	341.4	6.3	273	85
PLE#34	0.389	0.017	0.0539	0.0011	0.12741	0.0519	0.0023	333	12	338.2	7	264	97
PLE#35	0.41	0.017	0.0541	0.0011	0.15818	0.0549	0.0024	348	12	339.4	6.8	392	99
PLE#36	0.405	0.016	0.0547	0.001	0.37036	0.0535	0.0019	346	12	343.1	6.3	339	83
PLE#37	0.399	0.019	0.0543	0.0011	0.43721	0.0529	0.0023	339	14	341	6.7	295	93
PLE#38	0.398	0.018	0.0541	0.0012	0.25091	0.0533	0.0024	339	13	339.7	7.6	309	98
PLE#39	0.394	0.015	0.05379	0.00085	0.45234	0.0527	0.002	337	11	337.7	5.2	291	84
PLE#40	0.396	0.02	0.05421	0.00087	0.25237	0.0525	0.0026	337	15	340.3	5.3	280	110
PLE#41	0.403	0.017	0.05477	0.00093	0.16806	0.0532	0.0026	345	13	343.7	5.7	300	100
PLE#42	0.396	0.015	0.05428	0.00091	0.17065	0.0528	0.002	338	11	340.7	5.6	291	84
PLE#43	0.413	0.018	0.0544	0.0011	0.21055	0.0543	0.0023	350	13	341.4	6.4	370	95
PLE#44	0.389	0.018	0.05407	0.00099	0.27188	0.0519	0.0023	333	13	339.4	6	259	99
PLE#45	0.396	0.016	0.0545	0.0012	0.33293	0.0525	0.002	337	12	342.1	7.1	283	83
PLE#46	0.4	0.015	0.0541	0.001	0.32377	0.0537	0.0021	343	12	339.8	6.4	330	86
PLE#47	0.389	0.017	0.0543	0.0011	0.34124	0.0524	0.0024	332	12	340.8	7	274	97
PLE#48	0.407	0.018	0.05408	0.00094	0.39562	0.0542	0.0022	346	13	339.5	5.8	348	90
PLE#49	0.406	0.018	0.0548	0.0011	0.20485	0.0536	0.0025	345	13	343.9	6.7	317	99
PLE#50	0.396	0.017	0.0543	0.0011	0.11327	0.0529	0.0023	337	12	340.5	6.9	295	96
PLE#51	0.418	0.019	0.0546	0.0012	0.008121	0.0553	0.0026	353	13	342.9	7.1	400	100
PLE#52	0.414	0.02	0.0541	0.0012	0.036626	0.0553	0.0029	351	14	339.8	7.3	390	120
PLE#53	0.407	0.022	0.0537	0.0011	0.072887	0.0547	0.0031	346	16	337.3	6.6	360	130
PLE#54	0.396	0.017	0.0542	0.0013	0.024063	0.0527	0.0024	341	13	340.1	7.8	290	100
PLE#55	0.407	0.018	0.054	0.0011	0.43566	0.0548	0.0024	346	13	338.9	6.5	373	96
PLE#56	0.394	0.016	0.0545	0.0013	0.31464	0.0519	0.002	340	13	342.1	7.7	291	98
PLE#57	0.407	0.014	0.0547	0.0011	0.028013	0.0535	0.002	346	10	343	7	346	88
PLE#58	0.403	0.014	0.0543	0.00091	0.36333	0.0537	0.0017	343	9.8	340.8	5.6	338	71
PLE#59	0.391	0.013	0.0536	0.001	0.19222	0.0528	0.0019	334.2	9.4	336.8	6.4	294	77
PLE#60	0.386	0.017	0.05362	0.00099	0.23681	0.052	0.0023	330	12	336.7	6	255	96
Dating results of samples TT211 and TT213 have been submited to Lithos (Liu Kai et al., 2023; in review), but the trace elements are first published in this study.
TT211#001	0.2629	0.0081	0.03788	0.00064	0.23004	0.0501	0.0016	236.5	6.5	239.6	4	182	70	0.171	56.4	0.126	1.45	4.25	1.46	20.5	7.15	77.2	32.4	157.9	39.7	414	88.2	788	813			TT211#001	0.721519	92.1569	1.32632	3.10493	27.7778	25.1724	99.7567	191.176	303.937	572.438	954.079	1556.86	2435.29	3472.44		0.478195	239.6
TT211#002	0.306	0.025	0.0402	0.0015	0.16173	0.0551	0.005	269	19	254.1	9.5	330	190	0.39	3.6	0.169	3.67	6.3	0.52	26.7	10.3	114	44	207	49.7	396	79	65.9	171			TT211#002	1.64557	5.88235	1.77895	7.85867	41.1765	8.96552	129.927	275.401	448.819	777.385	1250.76	1949.02	2329.41	3110.24		0.122575	254.1
TT211#004	0.587	0.032	0.0764	0.0036	0.87264	0.0551	0.0014	465	20	474	21	393	59	0.008	3.45	0.072	1.13	3.16	0.193	18.3	5.62	81.4	29	145	34.1	343	66.9	129.9	634			TT211#004	0.0337553	5.63725	0.757895	2.4197	20.6536	3.32759	89.0511	150.267	320.472	512.367	876.133	1337.25	2017.65	2633.86		0.0775911	474
TT211#005	1.184	0.039	0.1288	0.0034	0.70878	0.0661	0.0015	789	19	780	19	792	49	0.26	1.68	0.216	2.82	6.09	0.264	38.2	11.6	132	35.1	141	26.6	223	41.9	76.3	521			TT211#005	1.09705	2.7451	2.27368	6.03854	39.8039	4.55172	185.888	310.16	519.685	620.141	851.964	1043.14	1311.76	1649.61		0.052916	780
TT211#007	0.274	0.015	0.0377	0.00074	0.15605	0.0528	0.0031	245	12	238.6	4.6	260	120		32.5	0.215	2.97	3.93	1.62	16.5	4.07	53.2	19.8	111	24.4	242	60.8	298	264			TT211#007	0	53.1046	2.26316	6.35974	25.6863	27.931	80.292	108.824	209.449	349.823	670.695	956.863	1423.53	2393.7		0.615036	238.6
TT211#009	0.289	0.023	0.0405	0.001	0.018636	0.0518	0.0043	254	18	256.1	6.3	170	160	0.286	27.7	0.41	3.74	5.8	2.18	24.2	6.07	77.4	28.4	140	28.7	248	50.8	169	177			TT211#009	1.20675	45.2614	4.31579	8.00857	37.9085	37.5862	117.762	162.299	304.724	501.767	845.921	1125.49	1458.82	2000		0.562547	256.1
TT211#010	0.2809	0.0064	0.03954	0.00053	0.34166	0.0512	0.0012	251.1	5.1	249.9	3.3	237	51	0.45	51.3	0.66	8.8	16.7	1.79	94.8	29.5	352	121.9	583	99.2	887	164	1880	1589			TT211#010	1.89873	83.8235	6.94737	18.8437	109.15	30.8621	461.314	788.77	1385.83	2153.71	3522.66	3890.2	5217.65	6456.69		0.137535	249.9
TT211#011	0.285	0.011	0.03995	0.00068	0.042539	0.0511	0.0021	253.7	8.6	252.5	4.2	228	89		18.6	0.054	0.94	2.24	0.88	9.6	3.05	42.8	17	82.5	20.3	242	61.9	497	714			TT211#011	0	30.3922	0.568421	2.01285	14.6405	15.1724	46.7153	81.5508	168.504	300.353	498.489	796.078	1423.53	2437.01		0.580159	252.5
TT211#013	0.261	0.026	0.0349	0.0014	0.16941	0.055	0.0057	234	21	220.9	8.6	320	220	1.88	59.7	1.68	13.8	11.9	3.96	29.7	7.3	80	26.8	121	24	271	55.7	284	239			TT211#013	7.93249	97.549	17.6842	29.5503	77.7778	68.2759	144.526	195.187	314.961	473.498	731.118	941.176	1594.12	2192.91		0.643972	220.9
TT211#014	0.284	0.011	0.03896	0.00074	0.089439	0.0532	0.0024	253.4	8.7	246.3	4.6	310	100	2.09	25.4	1.42	9	7.3	0.96	24.1	8.7	95	34.8	194	36.7	346	62.3	344	672			TT211#014	8.81857	41.5033	14.9474	19.2719	47.7124	16.5517	117.275	232.62	374.016	614.841	1172.21	1439.22	2035.29	2452.76		0.221271	246.3
TT211#015	1.462	0.037	0.1537	0.003	0.68747	0.0685	0.0012	913	16	921	17	881	33	0.082	17.1	0.104	2.1	5.33	0.122	30.9	10.1	141	52.7	255	55.8	454	88.4	346	660			TT211#015	0.345992	27.9412	1.09474	4.49679	34.8366	2.10345	150.365	270.053	555.118	931.095	1540.79	2188.24	2670.59	3480.31		0.029063	921
TT211#016	1.503	0.036	0.1389	0.0021	0.6689	0.0782	0.0013	929	14	838	12	1145	33	14.4	29	3.9	13.1	4.7	0.88	19.3	7.71	98	36.9	199	46.7	489	91	148	1453			TT211#016	60.7595	47.3856	41.0526	28.0514	30.719	15.1724	93.9173	206.15	385.827	651.943	1202.42	1831.37	2876.47	3582.68		0.282474	838
TT211#017	0.236	0.018	0.0329	0.0011	0.35398	0.0518	0.0038	214	15	208.5	6.6	220	150	1.05	40.7	1.04	9.5	10.1	3.29	34.9	10.8	114	28.2	121	22.8	178	39.6	288	306			TT211#017	4.43038	66.5033	10.9474	20.3426	66.0131	56.7241	169.83	288.77	448.819	498.233	731.118	894.118	1047.06	1559.06		0.53573	208.5
TT211#018	0.615	0.044	0.0822	0.0023	0.060695	0.0549	0.0041	479	27	509	13	300	150		0.68	0.083	2.62	5.5	0.77	31.6	11.46	158	57.8	287	51.2	469	84.1	41.4	87.1			TT211#018	0	1.11111	0.873684	5.61028	35.9477	13.2759	153.771	306.417	622.047	1021.2	1734.14	2007.84	2758.82	3311.02		0.178562	509
TT211#019	0.248	0.023	0.0341	0.0013	0.16468	0.0536	0.0052	222	19	216.2	7.9	230	190	3.9	43.9	0.45	5.01	5.3	2.24	16	4.78	42.5	13.7	61.5	12	118	27.3	196	130			TT211#019	16.4557	71.732	4.73684	10.7281	34.6405	38.6207	77.8589	127.807	167.323	242.049	371.601	470.588	694.118	1074.8		0.743659	216.2
TT211#020	0.283	0.012	0.03928	0.00076	0.27103	0.0526	0.0023	251.7	9.8	248.3	4.7	272	91	0.023	130	0.58	8.7	20.3	8.62	106.5	29.9	301	100.1	413	71.6	569	108.8	999	527			TT211#020	0.0970464	212.418	6.10526	18.6296	132.68	148.621	518.248	799.465	1185.04	1768.55	2495.47	2807.84	3347.06	4283.46		0.566772	248.3
TT211#021	0.317	0.019	0.0439	0.0011	0.31895	0.0543	0.0021	285	11	276.8	7	383	99	3.9	26.4	3.3	17.2	10.7	1	31.2	8.56	111	40.4	216	43.2	444	90.7	369	651			TT211#021	16.4557	43.1373	34.7368	36.8308	69.9346	17.2414	151.825	228.877	437.008	713.781	1305.14	1694.12	2611.76	3570.87		0.167323	276.8
TT211#022	0.267	0.013	0.0372	0.00063	0.047887	0.0532	0.0029	239	11	235.4	3.9	280	110		58	0.075	1.47	3.21	1.42	17.9	6.03	70.6	23.3	108.5	22.3	208	42.8	590	382			TT211#022	0	94.7712	0.789474	3.14775	20.9804	24.4828	87.1046	161.23	277.953	411.661	655.589	874.51	1223.53	1685.04		0.572708	235.4
TT211#023	0.294	0.024	0.0399	0.0014	0.164	0.0541	0.0043	266	19	252.2	8.8	350	150		57.7	0.114	2.6	6.1	3.04	37.2	11	130	43.6	194	35.8	328	70.1	302	235			TT211#023	0	94.281	1.2	5.56745	39.8693	52.4138	181.022	294.118	511.811	770.318	1172.21	1403.92	1929.41	2759.84		0.616965	252.2
TT211#024	0.327	0.028	0.0426	0.0013	0.015427	0.056	0.0048	282	21	268.9	8.3	370	190		24.7	0.025	1.52	3.43	1.45	15.3	4.2	51.1	15.8	82.5	16.5	137	28.2	79.8	121.8			TT211#024	0	40.3595	0.263158	3.25482	22.4183	25	74.4526	112.299	201.181	279.152	498.489	647.059	805.882	1110.24		0.611926	268.9
TT211#025	0.263	0.011	0.03787	0.0006	0.18909	0.0506	0.0021	236.2	8.8	239.6	3.7	210	92		17.4	0.133	2.26	5.4	0.7	39.2	14.8	189	73.6	365	68.1	626	116.8	318	527			TT211#025	0	28.4314	1.4	4.8394	35.2941	12.069	190.754	395.722	744.094	1300.35	2205.44	2670.59	3682.35	4598.43		0.14709	239.6
TT211#026	0.395	0.017	0.0547	0.00099	0.1944	0.0532	0.0023	336	12	343.2	6	298	91		17.3	0.228	4.83	9.5	1.88	44.4	14.4	175	58.8	293	57.3	521	97.7	347	439			TT211#026	0	28.268	2.4	10.3426	62.0915	32.4138	216.058	385.027	688.976	1038.87	1770.39	2247.06	3064.71	3846.46		0.279852	343.2
TT211#027	0.28	0.017	0.0384	0.0026	0.50227	0.0552	0.0037	253	14	242	16	360	140	17.9	142	13.6	61	56	16.2	139	32.3	262	66.5	275	50.9	416	80	940	664			TT211#027	75.5274	232.026	143.158	130.621	366.013	279.31	676.399	863.636	1031.5	1174.91	1661.63	1996.08	2447.06	3149.61		0.561355	242
TT211#030	0.284	0.01	0.04095	0.00069	0.1675	0.0514	0.0019	253.1	8.3	258.7	4.3	233	83	0.25	23.2	0.53	6	9.9	1.54	37.2	13.6	186	66.4	332	61.9	579	114.3	612	910			TT211#030	1.05485	37.9085	5.57895	12.848	64.7059	26.5517	181.022	363.636	732.283	1173.14	2006.04	2427.45	3405.88	4500		0.245333	258.7
TT211#031	0.302	0.014	0.04346	0.00091	0.21727	0.0516	0.0025	267	11	274.2	5.6	230	100	0.006	11.2	0.239	3.81	6.6	1.07	33.4	10.24	127.7	44.9	235	41.1	364	70.7	248	370			TT211#031	0.0253165	18.3007	2.51579	8.15846	43.1373	18.4483	162.53	273.797	502.756	793.286	1419.94	1611.76	2141.18	2783.46		0.220324	274.2
TT211#032	0.627	0.025	0.082	0.0017	0.21194	0.0575	0.0026	493	16	508	10	478	98	0.057	75.6	0.341	4.64	11.1	3.34	48.9	16	217	74.1	358	69.3	615	126.9	536	468			TT211#032	0.240506	123.529	3.58947	9.93576	72.549	57.5862	237.956	427.807	854.331	1309.19	2163.14	2717.65	3617.65	4996.06		0.438283	508
TT211#033	0.27	0.015	0.03795	0.00088	0.0049425	0.0533	0.0034	243	12	240	5.5	270	130		78.8	0.158	2.4	5	2.41	27.6	8.34	96.1	30.6	152	28.3	280	61.9	340	288			TT211#033	0	128.758	1.66316	5.13919	32.6797	41.5517	134.307	222.995	378.346	540.636	918.429	1109.8	1647.06	2437.01		0.627193	240
TT211#034	0.29	0.029	0.039	0.0015	0.14043	0.0564	0.0059	253	23	246.3	9.5	290	210	0.013	31	0.15	2.91	5.4	1.59	29.5	7.42	80.6	29.1	134	25.3	237	46.8	111.7	92			TT211#034	0.0548523	50.6536	1.57895	6.23126	35.2941	27.4138	143.552	198.396	317.323	514.134	809.668	992.157	1394.12	1842.52		0.385135	246.3
TT211#036	0.279	0.022	0.0387	0.002	0.37486	0.0549	0.0039	250	17	245	13	400	130	2.63	38	3.67	23.6	21	4.8	37.5	12	107	36.2	183	37.6	386	94	179	307			TT211#036	11.097	62.0915	38.6316	50.5353	137.255	82.7586	182.482	320.856	421.26	639.576	1105.74	1474.51	2270.59	3700.79		0.522925	245
TT211#037	0.267	0.012	0.03927	0.00067	0.067177	0.0506	0.0023	239.8	9.2	248.3	4.2	190	94		134.7	0.229	4.57	9.4	2.33	55.8	18.3	228	75.3	387	67.1	590	114.7	1134	550			TT211#037	0	220.098	2.41053	9.78587	61.4379	40.1724	271.533	489.305	897.638	1330.39	2338.37	2631.37	3470.59	4515.75		0.311027	248.3
TT211#038	0.278	0.01	0.04047	0.00072	0.14783	0.0507	0.002	248.3	8.2	255.7	4.5	218	86	0.49	62.1	0.62	6	7.4	2.59	29.6	8.8	93	31.3	151	33.9	323	77.5	1272	888			TT211#038	2.06751	101.471	6.52632	12.848	48.366	44.6552	144.039	235.294	366.142	553.004	912.387	1329.41	1900	3051.18		0.53501	255.7
TT211#039	0.335	0.015	0.045	0.0013	0.1631	0.0554	0.0032	292	12	283.5	7.7	370	120	0.99	21.3	1.32	9.1	9.3	1.53	26.5	7.2	73	29.5	152	34.3	328	78.4	376	620			TT211#039	4.17722	34.8039	13.8947	19.4861	60.7843	26.3793	128.954	192.513	287.402	521.201	918.429	1345.1	1929.41	3086.61		0.297955	283.5
TT211#040	0.311	0.027	0.0415	0.001	0.055183	0.056	0.0049	271	20	262.4	6.4	320	180	0.012	11.9	0.032	1.07	2.6	1.01	13.8	4.62	56.2	24.6	118.7	23.1	221	50.1	98.9	128.7			TT211#040	0.0506329	19.4444	0.336842	2.29122	16.9935	17.4138	67.1533	123.529	221.26	434.629	717.221	905.882	1300	1972.44		0.515488	262.4
TT211#041	0.28	0.013	0.03834	0.00078	0.21295	0.054	0.0026	251	11	242.5	4.8	320	100	0.48	28.1	0.6	6.5	10.7	2.93	43.2	10.21	105	32.7	142	28.4	247	54.4	350	410			TT211#041	2.02532	45.915	6.31579	13.9186	69.9346	50.5172	210.219	272.995	413.386	577.739	858.006	1113.73	1452.94	2141.73		0.416637	242.5
TT211#042	0.745	0.035	0.0936	0.0027	0.7306	0.0579	0.0018	561	20	576	16	504	73		1.72	0.141	1.03	2.8	0.146	20.7	7.96	100	34.7	162	32.7	290	56.4	114.4	482			TT211#042	0	2.81046	1.48421	2.20557	18.3007	2.51724	100.73	212.834	393.701	613.074	978.852	1282.35	1705.88	2220.47		0.058629	576
TT211#043	1.056	0.038	0.1201	0.0023	0.10669	0.0643	0.0025	728	19	731	13	735	81		4.37	0.313	5.08	7.6	0.7	40.7	12.22	137	51.7	219	39.3	359	64.7	59.3	210			TT211#043	0	7.14052	3.29474	10.8779	49.6732	12.069	198.054	326.738	539.37	913.428	1323.26	1541.18	2111.76	2547.24		0.12168	731
TT211#044	0.313	0.024	0.0444	0.0015	0.50471	0.0508	0.0035	275	18	280	9.2	200	150		3.8		0.23	0.27	0.033	7.8	2.44	22.2	12.9	68	13.5	110	28.1	87	453			TT211#044	0	6.20915	0	0.492505	1.76471	0.568966	37.9562	65.2406	87.4016	227.915	410.876	529.412	647.059	1106.3		0.0695198	280
TT211#045	0.301	0.017	0.0412	0.001	0.19471	0.0542	0.003	265	13	259.9	6.3	320	120	0.209	347	1.84	33.8	62.5	6.39	263	63	655	185	686	109.7	814	145.9	1046	354			TT211#045	0.881857	566.993	19.3684	72.3769	408.497	110.172	1279.81	1684.49	2578.74	3268.55	4145.02	4301.96	4788.24	5744.09		0.152373	259.9
TT211#046	0.296	0.019	0.0405	0.0009	0.15032	0.0533	0.0035	264	15	255.9	5.6	290	140	0.076	30.9	0.065	1.36	2.54	1.46	17.9	5.22	51.7	19.9	101.3	19.7	200	42.8	227	232			TT211#046	0.320675	50.4902	0.684211	2.91221	16.6013	25.1724	87.1046	139.572	203.543	351.59	612.085	772.549	1176.47	1685.04		0.661962	255.9
TT211#047	1.286	0.029	0.1377	0.0023	0.58376	0.0679	0.0012	838	13	832	13	856	37	0.0038	6.2	0.046	0.39	1.4		8.9	3.29	57.1	24.1	131	28	297	61.9	121.5	835			TT211#047	0.0160338	10.1307	0.484211	0.835118	9.15033	0	43.309	87.9679	224.803	425.795	791.541	1098.04	1747.06	2437.01		0	832
TT211#048	0.33	0.024	0.046	0.0015	0.24096	0.0527	0.0035	287	18	289.8	9.2	240	140		55.3	0.081	0.94	3.18	0.81	19.8	7.77	94.8	41.6	199	38.8	404	82	134.2	257			TT211#048	0	90.3595	0.852632	2.01285	20.7843	13.9655	96.3504	207.754	373.228	734.982	1202.42	1521.57	2376.47	3228.35		0.312078	289.8
TT211#049	0.295	0.013	0.04	0.0015	0.038901	0.0547	0.0026	264	11	252.9	9	350	100	4.3	21.3	2.54	15.7	12.2	2.34	39.7	12.5	153	62.3	331	80.4	851	195	411	1015			TT211#049	18.1435	34.8039	26.7368	33.6188	79.7386	40.3448	193.187	334.225	602.362	1100.71	2000	3152.94	5005.88	7677.17		0.325061	252.9
TT211#050	0.291	0.012	0.04103	0.00077	0.28831	0.0515	0.0021	258.5	9.1	259.2	4.8	242	89	0.169	50.4	0.292	2.93	5.09	2.34	23.4	6.51	71.6	28.1	126	26.6	274	64.2	699	602			TT211#050	0.71308	82.3529	3.07368	6.27409	33.268	40.3448	113.869	174.064	281.89	496.466	761.329	1043.14	1611.76	2527.56		0.6555	259.2
TT211#051	0.315	0.021	0.0415	0.0012	0.29503	0.0551	0.0042	275	17	262.2	7.6	380	140	0.008	4.57	0.127	2.87	6.3	0.79	35.5	11.4	126	40.9	201	37.3	352	71.6	105.8	203			TT211#051	0.0337553	7.46732	1.33684	6.14561	41.1765	13.6207	172.749	304.813	496.063	722.615	1214.5	1462.75	2070.59	2818.9		0.161498	262.2
TT211#052	0.295	0.029	0.0401	0.0012	0.3661	0.0559	0.0052	255	25	253.1	7.5	370	180	1.84	17.7	0.99	7.1	5.7	1.97	22.4	6.23	71.4	24.9	128	25.3	268	57	165	175.8			TT211#052	7.76371	28.9216	10.4211	15.2034	37.2549	33.9655	109.002	166.578	281.102	439.929	773.414	992.157	1576.47	2244.09		0.533001	253.1
TT211#053	0.255	0.011	0.0372	0.00067	0.20011	0.0495	0.0023	229.6	9.3	235.4	4.2	149	97	0.179	20.5	0.32	4.38	8.5	1.1	38	12	142	48.8	242	44.5	418	86.4	560	752			TT211#053	0.755274	33.4967	3.36842	9.37901	55.5556	18.9655	184.915	320.856	559.055	862.191	1462.24	1745.1	2458.82	3401.57		0.187118	235.4
TT211#054	5.09	0.17	0.328	0.012	0.67527	0.1152	0.002	1831	29	1821	56	1889	35	4.15	13.4	3.13	16.4	12.7	2.75	30.6	9.6	87	27.3	131	28.7	308	68.3	122.3	825			TT211#054	17.5105	21.8954	32.9474	35.1178	83.0065	47.4138	148.905	256.684	342.52	482.332	791.541	1125.49	1811.76	2688.98		0.426475	1821
TT211#055	0.28	0.017	0.03936	0.00083	0.035202	0.0523	0.0036	249	13	248.8	5.2	240	140	0.016	32	0.334	5.43	7.96	3.19	39.1	10.64	119	40.5	190	39.8	372	80.3	184	225.3			TT211#055	0.0675105	52.2876	3.51579	11.6274	52.0261	55	190.268	284.492	468.504	715.548	1148.04	1560.78	2188.24	3161.42		0.552802	248.8
TT211#056	0.351	0.025	0.0476	0.0012	0.22375	0.0536	0.0038	302	18	299.8	7.3	260	140		17.3	0.0029	0.68	2	0.32	18.3	5.74	77.7	38.3	191	41.4	420	89.1	117.9	173.5			TT211#056	0	28.268	0.0305263	1.4561	13.0719	5.51724	89.0511	153.476	305.906	676.678	1154.08	1623.53	2470.59	3507.87		0.161709	299.8
TT211#057	0.603	0.022	0.0793	0.0023	0.3299	0.0563	0.0022	478	14	492	14	439	87		5.7	0.295	4.5	6.4	0.49	33.3	10.8	136	49	243	48.6	435	91	336	504			TT211#057	0	9.31373	3.10526	9.63597	41.8301	8.44828	162.044	288.77	535.433	865.724	1468.28	1905.88	2558.82	3582.68		0.102614	492
TT211#058	0.283	0.015	0.03971	0.00085	0.25713	0.0524	0.0028	252	12	251	5.3	270	110		14.7	0.023	0.66	0.66	0.39	4.6	1.21	19.6	6.9	41.3	10.7	125	36.6	266	381			TT211#058	0	24.0196	0.242105	1.41328	4.31373	6.72414	22.3844	32.3529	77.1654	121.908	249.547	419.608	735.294	1440.94		0.684286	251
TT211#059	0.2805	0.0095	0.03862	0.00068	0.28328	0.053	0.0018	250.4	7.5	244.2	4.2	313	72	0.01	184	0.167	2.56	4.58	0.98	25.4	7.56	96.5	43.5	209	52.3	485	106.6	1295	657			TT211#059	0.0421941	300.654	1.75789	5.4818	29.9346	16.8966	123.601	202.139	379.921	768.551	1262.84	2050.98	2852.94	4196.85		0.277779	244.2
TT211#060	0.316	0.017	0.04395	0.0008	0.027078	0.0529	0.0029	277	13	277.3	5	270	120		19.2	0.277	5.8	13.3	2.03	102	32.3	367	139.5	642	122.6	1061	208	290	357			TT211#060	0	31.3725	2.91579	12.4197	86.9281	35	496.35	863.636	1444.88	2464.66	3879.15	4807.84	6241.18	8188.98		0.168498	277.3
TT211#061	0.406	0.021	0.0554	0.0012	0.259	0.0534	0.0026	344	15	347.4	7.1	310	100	0.34	19.2	0.239	3.33	6	0.89	36.6	11.8	156	68.9	312	73.4	673	143	339	370			TT211#061	1.4346	31.3725	2.51579	7.13062	39.2157	15.3448	178.102	315.508	614.173	1217.31	1885.2	2878.43	3958.82	5629.92		0.18361	347.4
TT211#062	1.353	0.035	0.1425	0.0023	0.36964	0.0694	0.0017	867	15	859	13	899	52	0.08	8.9	0.47	7.42	15.8	1.57	83.4	27.7	308	104.8	455	87.7	728	139.1	174	299			TT211#062	0.337553	14.5425	4.94737	15.8887	103.268	27.069	405.839	740.642	1212.6	1851.59	2749.24	3439.22	4282.35	5476.38		0.132224	859
TT211#063	0.292	0.025	0.039	0.0012	0.35529	0.0563	0.0052	256	20	246.6	7.3	310	190	0.021	58.2	0.389	8.5	14.9	6.47	57.7	12.7	103.1	32.4	103.4	18.1	143	25.6	230	118.9			TT211#063	0.0886076	95.098	4.09474	18.2013	97.3856	111.552	280.779	339.572	405.906	572.438	624.773	709.804	841.176	1007.87		0.674601	246.6
TT211#064	0.289	0.014	0.04027	0.00087	0.044396	0.0533	0.0028	257	11	254.5	5.4	290	110	2.37	20	0.98	8.7	6.1	1.51	27	6.6	68	23.6	102	21	209	47.5	283	410			TT211#064	10	32.6797	10.3158	18.6296	39.8693	26.0345	131.387	176.471	267.717	416.961	616.314	823.529	1229.41	1870.08		0.359711	254.5
TT211#065	0.293	0.03	0.0423	0.0016	0.033965	0.0519	0.0055	258	23	267	10	190	210		41	0.16	2.43	5.2	1.45	26.4	6.8	91	35.3	157	32.2	314	72.7	139	134			TT211#065	0	66.9935	1.68421	5.20343	33.9869	25	128.467	181.818	358.268	623.675	948.64	1262.75	1847.06	2862.2		0.378345	267
TT211#066	0.266	0.021	0.0396	0.0012	0.21406	0.0505	0.0043	240	18	250.1	7.3	150	160	0.013	42.2	0.129	3.1	3.87	1.62	17.9	4.71	51.4	20.5	81.2	17.1	151	31.7	196	122.7			TT211#066	0.0548523	68.9542	1.35789	6.63812	25.2941	27.931	87.1046	125.936	202.362	362.191	490.634	670.588	888.235	1248.03		0.595054	250.1
TT211#067	0.284	0.0097	0.0394	0.001	0.50351	0.0539	0.0019	254.6	8.2	249.9	6.1	335	76	3.15	194	2.46	19.9	20.5	6.48	84.6	24.4	256	82.1	348	71.8	632	127.4	1347	726			TT211#067	13.2911	316.993	25.8947	42.6124	133.987	111.724	411.679	652.406	1007.87	1450.53	2102.72	2815.69	3717.65	5015.75		0.475704	249.9
TT211#068	0.271	0.03	0.0388	0.0018	0.024242	0.0536	0.0061	238	24	245	11	180	220	0.8	38.5	0.96	9.3	11.2	3.35	37	9.4	82.3	30.1	120.4	24.6	227	44.9	172	112			TT211#068	3.37553	62.9085	10.1053	19.9143	73.2026	57.7586	180.049	251.337	324.016	531.802	727.492	964.706	1335.29	1767.72		0.503105	245
TT211#069	0.282	0.021	0.0397	0.0011	0.15727	0.0529	0.0045	249	16	251.1	6.7	240	170		38.8	0.094	0.99	2.74	0.48	13.7	4.23	54.2	21	101.4	24.6	238	52.2	144	148.6			TT211#069	0	63.3987	0.989474	2.11991	17.9085	8.27586	66.6667	113.102	213.386	371.025	612.689	964.706	1400	2055.12		0.239513	251.1
TT211#070	0.285	0.021	0.03916	0.00088	0.10894	0.0538	0.0041	252	16	247.5	5.5	290	160	0.013	18.1	0.09	1.88	2.81	1.43	13.5	3.28	35.1	12.6	56.1	13.7	161	40.9	146	219			TT211#070	0.0548523	29.5752	0.947368	4.0257	18.366	24.6552	65.6934	87.7005	138.189	222.615	338.973	537.255	947.059	1610.24		0.709806	247.5
TT211#071	0.295	0.02	0.0409	0.0015	0.10512	0.0524	0.0037	262	16	258.6	9.1	260	150	1.1	56.9	1.63	10.4	11.5	3.12	34.9	7.5	69	25.2	103	25	218	56	739	622			TT211#071	4.64135	92.9739	17.1579	22.2698	75.1634	53.7931	169.83	200.535	271.654	445.23	622.356	980.392	1282.35	2204.72		0.47612	258.6
TT211#072	0.358	0.053	0.0462	0.0023	0.14478	0.0581	0.0088	300	39	291	14	280	290		7.3		0.28	0.57	0.37	4.5	1.65	19.2	9.3	46.9	10.3	123	27.5	23.6	49.1			TT211#072	0	11.9281	0	0.599572	3.72549	6.37931	21.8978	44.1176	75.5906	164.311	283.384	403.922	723.529	1082.68		0.706288	291
TT211#074	0.2848	0.0083	0.04131	0.0007	0.08239	0.0506	0.0017	255.3	6.9	260.9	4.4	201	74	0.25	17.7	0.235	3.92	6	0.71	35.5	12.8	136	56.2	241	49.7	475	103.9	486	941			TT211#074	1.05485	28.9216	2.47368	8.394	39.2157	12.2414	172.749	342.246	535.433	992.933	1456.19	1949.02	2794.12	4090.55		0.148728	260.9
TT211#075	0.288	0.012	0.04181	0.00087	0.34674	0.0505	0.002	258	9.7	264	5.4	191	88		25.1	0.094	1.48	2.33	1.1	10.6	3.46	34.6	12.5	64.4	15	180	45	441	508			TT211#075	0	41.0131	0.989474	3.16916	15.2288	18.9655	51.5815	92.5134	136.22	220.848	389.124	588.235	1058.82	1771.65		0.676683	264
TT211#076	0.268	0.013	0.03912	0.00097	0.22987	0.0509	0.0023	244	10	247.3	6	203	94	0.178	33.9	0.42	7.1	8.2	3.19	31.2	7.2	67	21.5	82.9	18.2	201	47.8	391	549			TT211#076	0.751055	55.3922	4.42105	15.2034	53.5948	55	151.825	192.513	263.78	379.859	500.906	713.725	1182.35	1881.89		0.60972	247.3
TT211#077	0.296	0.013	0.04205	0.00075	0.011532	0.0513	0.0025	262	11	265.5	4.7	220	110		18.1	0.206	3.27	7.1	0.91	41.1	12.9	152	59	233	47.5	411	87.5	337	482			TT211#077	0	29.5752	2.16842	7.00214	46.4052	15.6897	200	344.92	598.425	1042.4	1407.85	1862.75	2417.65	3444.88		0.16286	265.5
TT211#078	0.284	0.014	0.03973	0.00071	0.072924	0.0519	0.0027	253	11	251.1	4.4	230	100		15.3		0.21	0.86	0.53	4.3	1.36	18.4	6.7	38.9	8.7	101.8	29.7	179	293			TT211#078	0	25	0	0.449679	5.62092	9.13793	20.9246	36.3636	72.4409	118.375	235.045	341.176	598.824	1169.29		0.84259	251.1
TT211#079	1.581	0.043	0.1596	0.0027	0.33535	0.0717	0.002	960	17	954	15	953	58	0.019	9.5	0.49	8.8	14.2	1.16	81.8	25.7	272	116.3	449	82.8	691	134.5	147	271			TT211#079	0.0801688	15.5229	5.15789	18.8437	92.8105	20	398.054	687.166	1070.87	2054.77	2712.99	3247.06	4064.71	5295.28		0.104054	954
TT211#081	0.295	0.019	0.04232	0.00089	0.02999	0.0509	0.0035	260	15	267.1	5.5	170	140	0.01	7.6	0.236	4.81	9.4	1.51	55.5	20.2	212	77.9	331	68.6	581	113	146.6	202.4			TT211#081	0.0421941	12.4183	2.48421	10.2998	61.4379	26.0345	270.073	540.107	834.646	1376.33	2000	2690.2	3417.65	4448.82		0.202111	267.1
TT211#082	0.271	0.012	0.03756	0.0007	0.19089	0.0521	0.0024	242.3	9.8	237.7	4.3	244	98		175	0.188	4.93	8.9	1.45	58.3	16.5	169	69.4	284	56.2	511	99	952	474			TT211#082	0	285.948	1.97895	10.5567	58.1699	25	283.698	441.176	665.354	1226.15	1716.01	2203.92	3005.88	3897.64		0.194609	237.7
TT211#083	0.285	0.017	0.0412	0.0012	0.21105	0.0502	0.0029	253	13	260	7.2	160	120		62	0.154	3	5.8	2.23	33.4	9.8	102.3	41.8	168	35.4	312	59.4	290	246			TT211#083	0	101.307	1.62105	6.42398	37.9085	38.4483	162.53	262.032	402.756	738.516	1015.11	1388.24	1835.29	2338.58		0.489825	260
TT211#084	0.277	0.013	0.03994	0.00068	0.087843	0.0504	0.0025	247	11	252.4	4.2	190	100		42.4		0.39	1.37	0.94	11.9	4.32	49.4	21.4	109.3	23.9	269	61.6	398	475			TT211#084	0	69.281	0	0.835118	8.95425	16.2069	57.9075	115.508	194.488	378.092	660.423	937.255	1582.35	2425.2		0.711734	252.4
TT211#085	0.272	0.014	0.03873	0.00073	0.080053	0.0512	0.0028	243	11	244.9	4.5	200	110		121.6	0.063	2.32	4.98	0.53	27	9.25	105.4	41.3	177	37.8	346	66.5	623	373			TT211#085	0	198.693	0.663158	4.96788	32.549	9.13793	131.387	247.326	414.961	729.682	1069.49	1482.35	2035.29	2618.11		0.139734	244.9
TT211#086	0.302	0.015	0.04374	0.00097	0.14467	0.0499	0.0025	267	12	275.9	6	170	110		53	0.037	1.07	2.58	0.87	20.8	6.34	83.3	35.6	179	36.8	390	88.5	358	383			TT211#086	0	86.6013	0.389474	2.29122	16.8627	15	101.217	169.519	327.953	628.975	1081.57	1443.14	2294.12	3484.25		0.363079	275.9
TT211#087	0.2822	0.0099	0.03919	0.0006	0.44755	0.0521	0.0017	251.8	7.9	247.8	3.7	263	72	0.0041	64.7	0.052	1.34	3.31	0.78	21.5	8.95	112.1	47.7	229	57.4	553	116	393	753			TT211#087	0.0172996	105.719	0.547368	2.86938	21.634	13.4483	104.623	239.305	441.339	842.756	1383.69	2250.98	3252.94	4566.93		0.282673	247.8
TT211#088	0.298	0.05	0.0413	0.0017	0.20953	0.061	0.012	257	38	260	11	260	300	0.066	22.4	0.122	2.17	4.06	1.48	27.2	7.15	87	36.5	150	31	265	56.4	143	156			TT211#088	0.278481	36.6013	1.28421	4.64668	26.5359	25.5172	132.36	191.176	342.52	644.876	906.344	1215.69	1558.82	2220.47		0.430564	260
TT211#089	0.273	0.02	0.04003	0.00099	0.23527	0.0492	0.0036	242	16	252.9	6.1	90	150		7.1	0.091	1.74	2.82	0.92	20	7.4	75.6	33.1	154	30	278	59.4	86.4	175			TT211#089	0	11.6013	0.957895	3.72591	18.4314	15.8621	97.3236	197.861	297.638	584.806	930.514	1176.47	1635.29	2338.58		0.374517	252.9
TT211#090	0.257	0.023	0.0371	0.0014	0.23494	0.0505	0.0047	229	18	235	8.4	150	180	0.045	45.2	0.248	4.7	6.1	2.21	25.4	7.64	64.6	23.7	95.6	17.2	156	32	146	138			TT211#090	0.189873	73.8562	2.61053	10.0642	39.8693	38.1034	123.601	204.278	254.331	418.728	577.644	674.51	917.647	1259.84		0.542793	235
TT211#091	0.622	0.016	0.0784	0.0012	0.2943	0.0571	0.0016	490	10	486.6	7	474	60	0.08	21.5	0.57	7.7	14	0.93	75.3	22.8	257	83.8	392	72.4	628	124.2	679	719			TT211#091	0.337553	35.1307	6	16.4882	91.5033	16.0345	366.423	609.626	1011.81	1480.57	2368.58	2839.22	3694.12	4889.76		0.0875679	486.6
TT211#092	0.68	0.027	0.0826	0.0019	0.25027	0.0597	0.0025	525	17	512	11	581	84	3.5	26.1	4.4	23	11.3	0.32	30.3	9.7	113	47.5	218	42.9	414	79.6	154	454			TT211#092	14.7679	42.6471	46.3158	49.2505	73.8562	5.51724	147.445	259.358	444.882	839.223	1317.22	1682.35	2435.29	3133.86		0.0528705	512
TT211#093	0.685	0.025	0.0847	0.0011	0.20712	0.0582	0.0021	528	15	524.3	6.5	496	82	0.041	6.7	0.542	10.7	20.2	2.01	111	34	370	145	588	109.8	934	184	349	348			TT211#093	0.172996	10.9477	5.70526	22.9122	132.026	34.6552	540.146	909.091	1456.69	2561.84	3552.87	4305.88	5494.12	7244.09		0.129772	524.3
TT211#094	0.306	0.014	0.04161	0.00071	0.09486	0.053	0.0025	270	11	262.8	4.4	290	100		10.2	0.117	2.09	4.37	0.66	25.6	9.74	99.4	39.1	187	36.2	362	73.3	200	399			TT211#094	0	16.6667	1.23158	4.47537	28.5621	11.3793	124.574	260.428	391.339	690.813	1129.91	1419.61	2129.41	2885.83		0.190769	262.8
TT211#095	0.31	0.031	0.0414	0.0012	0.10251	0.0552	0.0057	271	25	261.4	7.4	290	200		21.9	0.031	0.68	2.63	1.38	16.9	5.58	70.6	30.6	145	27.6	273	62.7	119.9	126.7			TT211#095	0	35.7843	0.326316	1.4561	17.1895	23.7931	82.2384	149.198	277.953	540.636	876.133	1082.35	1605.88	2468.5		0.632822	261.4
TT211#096	0.282	0.011	0.03996	0.00063	0.23556	0.0507	0.002	251.7	8.7	252.6	3.9	203	83	4.15	27	1.53	11.5	12.6	3.18	76.8	24.2	256	110.2	490	95.4	869	179	477	558			TT211#096	17.5105	44.1176	16.1053	24.6253	82.3529	54.8276	373.723	647.059	1007.87	1947	2960.73	3741.18	5111.76	7047.24		0.312525	252.6
TT211#097	0.323	0.023	0.044	0.0012	0.15823	0.0532	0.0039	281	17	277.4	7.4	270	150		5.4	0.096	1.7	4.84	0.5	20.6	6.42	68.3	26.6	123.8	24.3	215	47.4	93.8	150.3			TT211#097	0	8.82353	1.01053	3.64026	31.634	8.62069	100.243	171.658	268.898	469.965	748.036	952.941	1264.71	1866.14		0.153087	277.4
TT211#098	0.289	0.026	0.0384	0.0019	0.32138	0.0591	0.0054	265	20	243	12	470	180	1.71	60.8	2.48	23.6	20.7	7.8	59.2	13.4	94	26.9	101	19.8	200	42.3	237	170			TT211#098	7.21519	99.3464	26.1053	50.5353	135.294	134.483	288.078	358.289	370.079	475.265	610.272	776.471	1176.47	1665.35		0.681196	243
TT211#099	0.2801	0.0098	0.04003	0.00068	0.21924	0.0504	0.0018	250.1	7.8	253	4.2	190	78	0.057	17.7	0.274	3.54	5.4	1.11	32.8	10.8	126	52.6	233	45.6	438	87.4	401	719			TT211#099	0.240506	28.9216	2.88421	7.5803	35.2941	19.1379	159.611	288.77	496.063	929.329	1407.85	1788.24	2576.47	3440.94		0.254984	253
TT211#100	0.347	0.024	0.0461	0.0012	0.23047	0.0543	0.0038	299	18	290.4	7.4	300	150	0.16	11	0.07	2.45	3.21	0.69	20.4	7.16	79.7	32.8	144	30.6	287	62.8	92.2	159.3			TT211#100	0.675105	17.9739	0.736842	5.24625	20.9804	11.8966	99.2701	191.444	313.78	579.505	870.091	1200	1688.24	2472.44		0.260678	290.4
TT211#101	0.315	0.019	0.0422	0.001	0.023532	0.0541	0.0036	276	15	266.2	6.2	290	140		9.4	0.203	3.28	5.69	0.9	31.3	10.2	109	41.5	184	32.6	294	58.7	149.8	220.3			TT211#101	0	15.3595	2.13684	7.02355	37.1895	15.5172	152.311	272.727	429.134	733.216	1111.78	1278.43	1729.41	2311.02		0.206176	266.2
TT211#102	0.27	0.019	0.03895	0.00099	0.32582	0.0497	0.0034	240	15	246.3	6.2	140	140	0.13	62.6	0.204	4.43	6.1	2.94	40.9	12.1	124	45.5	196	38.6	333	63.5	268	197			TT211#102	0.548523	102.288	2.14737	9.48608	39.8693	50.6897	199.027	323.529	488.189	803.887	1184.29	1513.73	1958.82	2500		0.569042	246.3
TT211#103	0.2598	0.0088	0.03789	0.00072	0.033955	0.0496	0.0019	235.2	7.4	239.7	4.5	163	84		32.5	0.0037	0.63	1.12	0.7	8.9	2.97	33.2	11.8	66.8	16.1	179	49	565	700			TT211#103	0	53.1046	0.0389474	1.34904	7.32026	12.069	43.309	79.4118	130.709	208.481	403.625	631.373	1052.94	1929.13		0.677825	239.7
TT211#104	0.299	0.044	0.0399	0.002	0.10717	0.0564	0.0086	265	36	252	13	230	290		4.52		0.4	0.98	0.168	8.6	3.1	38.5	15	78.1	15.8	178	34.4	16.8	36.2			TT211#104	0	7.38562	0	0.856531	6.40523	2.89655	41.8491	82.8877	151.575	265.018	471.903	619.608	1047.06	1354.33		0.176917	252
TT211#105	0.284	0.018	0.03848	0.00092	0.2154	0.0519	0.0033	255	14	243.3	5.7	270	130		13.4		0.049	0.042	0.25	1.59	0.66	9.9	4.37	30.3	7.2	100.5	33.2	164	337			TT211#105	0	21.8954	0	0.104925	0.27451	4.31034	7.73723	17.6471	38.9764	77.2085	183.082	282.353	591.176	1307.09		2.95761	243.3
TT211#106	1.88	0.11	0.1796	0.0058	0.1518	0.0755	0.0048	1063	38	1069	30	1010	130		24.5	0.077	2.31	4.53	1.1	23.9	7	74.9	30.7	124	23.5	196	45.6	21.5	33.6			TT211#106	0	40.0327	0.810526	4.94647	29.6078	18.9655	116.302	187.166	294.882	542.403	749.245	921.569	1152.94	1795.28		0.323198	1069
TT211#107	0.43	0.014	0.0588	0.0011	0.17563	0.0529	0.0018	364	9.4	368.3	6.7	297	75	0.063	64.4	0.042	1.27	2.07	0.81	17.2	7.67	104	51.1	329	76.6	873	199	317	549			TT211#107	0.265823	105.229	0.442105	2.71949	13.5294	13.9655	83.6983	205.08	409.449	902.827	1987.92	3003.92	5135.29	7834.65		0.415011	368.3
TT211#108	0.278	0.028	0.0388	0.0012	0.47027	0.0502	0.0046	247	23	245.1	7.3	160	190	0.044	77	0.4	6.5	10.5	2.09	49.6	17	197	74.7	344	66.2	609	123.3	263	228			TT211#108	0.185654	125.817	4.21053	13.9186	68.6275	36.0345	241.363	454.545	775.591	1319.79	2078.55	2596.08	3582.35	4854.33		0.279985	245.1
TT211#109	0.557	0.02	0.0711	0.0013	0.19662	0.0566	0.0021	448	13	442.7	7.7	438	81		12.9	0.041	0.37	2.03	0.023	11.4	5.1	59.8	25.5	122.4	24.8	249	53	120.1	326			TT211#109	0	21.0784	0.431579	0.792291	13.268	0.396552	55.4745	136.364	235.433	450.53	739.577	972.549	1464.71	2086.61		0.0146168	442.7
TT211#110	0.303	0.02	0.0412	0.0013	0.41923	0.0541	0.0031	269	15	260	7.8	300	120	0.0033	117	0.122	1.91	2.34	0.88	16.7	5.72	67.9	33.1	170	35.6	367	81	316	265			TT211#110	0.0139241	191.176	1.28421	4.08994	15.2941	15.1724	81.2652	152.941	267.323	584.806	1027.19	1396.08	2158.82	3188.98		0.430368	260
TT211#111	0.295	0.022	0.0395	0.0012	0.24526	0.0548	0.004	259	16	249.4	7.3	320	150	0.065	54.8	0.353	6.03	11.2	1.63	57.4	17.5	199	67.2	295	56.2	491	95.2	189	164			TT211#111	0.274262	89.5425	3.71579	12.9122	73.2026	28.1034	279.319	467.914	783.465	1187.28	1782.48	2203.92	2888.24	3748.03		0.196538	249.4
TT211#112	0.302	0.018	0.04152	0.00093	0.19014	0.0531	0.0033	268	15	262.2	5.8	260	130		10.2	0.038	1.34	2.66	0.76	11.5	3.83	43.3	19.2	95.3	19.7	219	53.8	131.6	202.2			TT211#112	0	16.6667	0.4	2.86938	17.3856	13.1034	55.9611	102.406	170.472	339.223	575.831	772.549	1288.24	2118.11		0.420095	262.2
TT211#113	0.304	0.033	0.0406	0.0013	0.025211	0.0551	0.0061	263	25	256.3	8	230	210		10.7	0.049	1.01	2.59	0.97	15.9	4.26	47	18.7	92.2	17.2	181	42.3	62.6	86.1			TT211#113	0	17.4837	0.515789	2.16274	16.9281	16.7241	77.3723	113.904	185.039	330.389	557.1	674.51	1064.71	1665.35		0.462112	256.3
TT211#114	0.305	0.011	0.04302	0.00068	0.34745	0.0505	0.0018	269.8	8.6	271.5	4.2	199	77	0.0049	17.2	0.186	4.17	7.4	0.81	39.9	12.4	138	58.6	277	50.8	517	102.3	374	567			TT211#114	0.0206751	28.1046	1.95789	8.92934	48.366	13.9655	194.161	331.551	543.307	1035.34	1673.72	1992.16	3041.18	4027.56		0.144114	271.5
TT211#115	0.26	0.011	0.0363	0.00067	0.049435	0.0511	0.0024	234	9.1	229.8	4.2	220	100	5.19	38.9	3.11	21.7	14.4	3.65	23.2	5.31	40.5	10.9	53.9	11.3	120	32.8	723	785			TT211#115	21.8987	63.5621	32.7368	46.4668	94.1176	62.931	112.895	141.979	159.449	192.58	325.68	443.137	705.882	1291.34		0.610508	229.8
TT211#116	0.262	0.017	0.0391	0.001	0.17509	0.049	0.0036	237	14	247.3	6.3	90	140		83.7	0.18	3.29	6.4	1.62	24.8	8.31	79.9	29.8	130.7	23.6	236	45.7	317	202.6			TT211#116	0	136.765	1.89474	7.04497	41.8301	27.931	120.681	222.193	314.567	526.502	789.728	925.49	1388.24	1799.21		0.393118	247.3
TT211#117	0.2999	0.0089	0.04224	0.00066	0.042292	0.0513	0.0017	265.8	6.9	267.4	3.9	231	73	0.107	27.4	0.071	1.22	1.67	0.61	14.3	5.12	52.5	21.9	106	21.7	224	45.4	269	797			TT211#117	0.451477	44.7712	0.747368	2.61242	10.915	10.5172	69.5864	136.898	206.693	386.926	640.483	850.98	1317.65	1787.4		0.381617	267.4
TT211#118	0.273	0.024	0.0393	0.0011	0.25053	0.0509	0.005	241	19	248.1	6.9	120	190	6	60.8	1.2	6	5.8	1.63	26.9	6.89	78.9	29.5	140	30.4	288	65.2	299	162			TT211#118	25.3165	99.3464	12.6316	12.848	37.9085	28.1034	130.9	184.225	310.63	521.201	845.921	1192.16	1694.12	2566.93		0.398952	248.1
TT211#119	0.285	0.027	0.0381	0.0013	0.15374	0.0538	0.0053	250	21	240.7	7.8	240	190	0.065	76.9	0.435	7.38	12.5	3.01	48.7	13.7	129	45.4	190	33.9	316	61.1	218	105.4			TT211#119	0.274262	125.654	4.57895	15.803	81.6993	51.8966	236.983	366.31	507.874	802.12	1148.04	1329.41	1858.82	2405.51		0.372967	240.7
TT211#120	0.27	0.01	0.03741	0.00078	0.25217	0.0521	0.0019	241.9	8.1	236.7	4.8	261	81	2.99	96	2.7	17.4	19.6	5.7	66	18	152	57.8	238	48.7	487	111.1	1150	699			TT211#120	12.616	156.863	28.4211	37.2591	128.105	98.2759	321.168	481.283	598.425	1021.2	1438.07	1909.8	2864.71	4374.02		0.484505	236.7
TT211#121	0.289	0.014	0.03992	0.00073	0.097274	0.0524	0.0026	256	11	252.3	4.5	260	110	0.006	25.2	0.017	0.28	0.86	0.48	6.8	2.04	25.3	12.5	59.4	15	185	45.7	261	442			TT211#121	0.0253165	41.1765	0.178947	0.599572	5.62092	8.27586	33.09	54.5455	99.6063	220.848	358.912	588.235	1088.24	1799.21		0.606822	252.3
TT211#122	0.3	0.018	0.04057	0.00088	0.083909	0.0541	0.0034	264	14	256.3	5.5	300	140		30.2	0.03	1.06	2.88	0.95	16.1	6.06	82.1	31.2	153	32.7	328	75.8	204	213			TT211#122	0	49.3464	0.315789	2.26981	18.8235	16.3793	78.3455	162.032	323.228	551.237	924.471	1282.35	1929.41	2984.25		0.426519	256.3
TT211#123	0.278	0.027	0.0385	0.0012	0.00013951	0.0528	0.0052	244	21	243.2	7.3	210	200		19.3	0.072	1.63	2.21	0.89	10.1	2.46	27.1	10.3	42.7	8.8	104	24.1	121.5	100.2			TT211#123	0	31.5359	0.757895	3.49036	14.4444	15.3448	49.1484	65.7754	106.693	181.979	258.006	345.098	611.765	948.819		0.575913	243.2
TT211#124	0.294	0.012	0.04111	0.00085	0.21657	0.0518	0.0021	260.9	9.5	259.7	5.3	246	87	0.009	30.7	0.163	4.49	7.08	2.32	43.5	15.2	193	81.7	379	76.8	714	139	432	507			TT211#124	0.0379747	50.1634	1.71579	9.61456	46.2745	40	211.679	406.417	759.843	1443.46	2290.03	3011.76	4200	5472.44		0.404157	259.7
TT211#125	0.304	0.014	0.0411	0.001	0.040351	0.0528	0.0025	272	12	259.7	6.2	340	100	1.99	12.5	2.03	11.3	8.3	1.76	18.8	6.59	77	32.4	168	38.1	393	87.5	157	682			TT211#125	8.39662	20.4248	21.3684	24.197	54.2484	30.3448	91.4842	176.203	303.15	572.438	1015.11	1494.12	2311.76	3444.88		0.430743	259.7
TT211#126	0.285	0.012	0.03953	0.00086	0.19211	0.0523	0.0024	253.7	9.8	249.9	5.4	290	100	1.73	21.2	0.3	1.9	1.01	0.42	5.9	1.91	21.8	10.6	52.7	12.5	160	44.7	301	522			TT211#126	7.29958	34.6405	3.15789	4.06852	6.60131	7.24138	28.7105	51.0695	85.8268	187.279	318.429	490.196	941.176	1759.84		0.526001	249.9
TT211#127	0.315	0.027	0.0408	0.0011	0.037247	0.057	0.0051	278	19	257.8	7	420	160	2.64	59.3	0.77	6.9	5.8	2.29	23.9	6.53	63.8	22.5	106.3	24.4	223	54.1	393	219.8			TT211#127	11.1392	96.8954	8.10526	14.7752	37.9085	39.4828	116.302	174.599	251.181	397.527	642.296	956.863	1311.76	2129.92		0.594629	257.8
TT211#128	0.316	0.031	0.0414	0.0012	0.10747	0.055	0.0053	274	24	261.4	7.7	270	200		14.6	0.048	1.09	2.03	0.97	15.7	3.7	47.7	19.4	90.3	20.2	199	46.3	60.8	86.3			TT211#128	0	23.8562	0.505263	2.33405	13.268	16.7241	76.399	98.9305	187.795	342.756	545.619	792.157	1170.59	1822.83		0.525288	261.4
TT211#130	0.2753	0.0092	0.0386	0.0012	0.30397	0.0524	0.0017	246.3	7.3	244.3	7.3	286	74	4.19	70.4	2.74	18	12.3	4.1	24.1	6.11	46.3	14.1	52.8	10.7	105	21.6	778	949			TT211#130	17.6793	115.033	28.8421	38.5439	80.3922	70.6897	117.275	163.369	182.283	249.117	319.033	419.608	617.647	850.394		0.728025	244.3
TT211#131	0.286	0.024	0.03852	0.00087	0.055438	0.0551	0.0049	252	19	243.6	5.4	310	190		25.5	0.069	1.72	2.94	1.04	12.7	4.04	45.8	20	99	23.2	212	46.2	146	174.6			TT211#131	0	41.6667	0.726316	3.68308	19.2157	17.931	61.8005	108.021	180.315	353.357	598.187	909.804	1247.06	1818.9		0.520333	243.6
TT213#001	0.345	0.023	0.045	0.0015	0.098508	0.0561	0.0044	299	17	283.4	9.2	370	160		24.1		0.27	1.09	0.39	9.2	3.52	45.1	21.9	135	30.2	351	84.3	118	198			TT213#001	0	39.3791	0	0.578158	7.12418	6.72414	44.7689	94.1176	177.559	386.926	815.71	1184.31	2064.71	3318.9		0.376514	283.4
TT213#002	0.267	0.011	0.0372	0.00096	0.58054	0.0516	0.002	239.5	8.9	235.4	5.9	239	83		13.9	0.293	4.9	7.4	1.47	36.6	12.4	128	50.2	220	52	480	94.7	436	713			TT213#002	0	22.7124	3.08421	10.4925	48.366	25.3448	178.102	331.551	503.937	886.926	1329.31	2039.22	2823.53	3728.35		0.273077	235.4
TT213#003	0.265	0.012	0.0363	0.00094	0.359	0.0514	0.0024	237.7	9.7	229.8	5.8	228	96	0.006	159	0.41	8.3	16.6	4.3	92.8	28.9	338	135	546	108.6	1083	216	939	592			TT213#003	0.0253165	259.804	4.31579	17.773	108.497	74.1379	451.582	772.727	1330.71	2385.16	3299.09	4258.82	6370.59	8503.94		0.334938	229.8
TT213#004	0.62	0.027	0.0782	0.0018	0.40239	0.0568	0.0023	490	17	485	11	454	89	0.0046	5.5	0.033	0.63	2.03	0.281	8.6	4.01	34.3	15.3	72	13.8	146	27.5	62.1	356			TT213#004	0.0194093	8.98693	0.347368	1.34904	13.268	4.84483	41.8491	107.219	135.039	270.318	435.045	541.176	858.824	1082.68		0.205605	485
TT213#005	0.639	0.024	0.0791	0.0019	0.43727	0.0574	0.0019	502	14	490	11	505	73	57	119	13.5	55	8.6	0.35	12.6	3.95	42.4	16.1	78.5	21.1	209	41.6	179	426			TT213#005	240.506	194.444	142.105	117.773	56.2092	6.03448	61.3139	105.615	166.929	284.452	474.32	827.451	1229.41	1637.8		0.102791	490
TT213#006	0.296	0.021	0.041	0.0012	0.37824	0.0507	0.0033	261	17	258.7	7.6	200	140	0.0041	4.7	0.259	4.35	10	0.21	60.8	19.9	226	90.1	343	71	640	132	138	251			TT213#006	0.0172996	7.67974	2.72632	9.31478	65.3595	3.62069	295.864	532.086	889.764	1591.87	2072.51	2784.31	3764.71	5196.85		0.026037	258.7
TT213#007	0.299	0.011	0.04116	0.00084	0.2287	0.0522	0.002	266.4	8.7	260	5.2	264	83	0.92	11.5	0.29	2.36	2.18	0.145	18	6.26	83	35.2	167	35.6	317	63.8	252	550			TT213#007	3.88186	18.7908	3.05263	5.05353	14.2484	2.5	87.5912	167.38	326.772	621.908	1009.06	1396.08	1864.71	2511.81		0.0707664	260
TT213#008	0.289	0.034	0.037	0.0016	0.074083	0.0553	0.0063	252	26	234	10	280	230	0.133	28.3	0.172	2.69	4.22	1.23	18.1	4.66	43.5	17.3	74.6	15.5	160	26.1	91	66.6			TT213#008	0.561181	46.2418	1.81053	5.76017	27.5817	21.2069	88.0779	124.599	171.26	305.654	450.755	607.843	941.176	1027.56		0.430262	234
TT213#009	0.631	0.014	0.0791	0.0014	0.51714	0.057	0.0011	496.1	8.4	490.9	8.6	481	43		11.2	0.055	1.68	3.13	0.23	17.3	4.76	61.3	23.7	101	21.8	207	40.8	636	1810			TT213#009	0	18.3007	0.578947	3.59743	20.4575	3.96552	84.1849	127.273	241.339	418.728	610.272	854.902	1217.65	1606.3		0.0955556	490.9
TT213#010	0.286	0.018	0.0407	0.0012	0.29564	0.0506	0.0031	254	14	257.3	7.3	190	130		37.9	0.132	2.62	5.33	3.74	48.3	16.1	190	75.6	353	75.2	719	141	246	252			TT213#010	0	61.9281	1.38947	5.61028	34.8366	64.4828	235.036	430.481	748.031	1335.69	2132.93	2949.02	4229.41	5551.18		0.71262	257.3
TT213#011	0.893	0.052	0.1028	0.0032	0.68509	0.0632	0.003	647	26	630	18	720	110		1.14	0.048	1.35	4.32	0.021	35.8	15.7	209	91	394	80.4	807	146	74.1	273			TT213#011	0	1.86275	0.505263	2.89079	28.2353	0.362069	174.209	419.786	822.835	1607.77	2380.66	3152.94	4747.06	5748.03		0.00516249	630
TT213#012	0.665	0.017	0.0823	0.0024	0.46722	0.0583	0.0019	517	10	509	14	522	71	0.182	5.3	0.48	6.6	9.8	0.35	50.7	20.3	213	82.2	334	68.8	553	102.3	490	1107			TT213#012	0.767932	8.66013	5.05263	14.1328	64.0523	6.03448	246.715	542.781	838.583	1452.3	2018.13	2698.04	3252.94	4027.56		0.0480037	509
TT213#013	0.492	0.032	0.0648	0.0014	0.39127	0.0542	0.0032	402	21	404.4	8.7	310	120		61.1	0.15	3.18	6.4	2.06	34.2	12.6	139	56	260	54.4	508	97.4	244	208			TT213#013	0	99.8366	1.57895	6.80942	41.8301	35.5172	166.423	336.898	547.244	989.399	1571	2133.33	2988.24	3834.65		0.425684	404.4
TT213#014	1.127	0.033	0.1255	0.0028	0.63258	0.0639	0.0015	764	16	762	16	721	50	0.012	13.5	0.57	9.6	15	0.085	72.8	24.3	253	97.2	397	78.7	663	118	583	554			TT213#014	0.0506329	22.0588	6	20.5567	98.0392	1.46552	354.258	649.733	996.063	1717.31	2398.79	3086.27	3900	4645.67		0.00786378	762
TT213#015	0.639	0.028	0.081	0.0018	0.67482	0.0569	0.0028	498	17	502	10	430	100		4.87		0.44	1.67	0.171	10.3	3.43	44.8	17	68.5	15.1	147	29.3	83.1	224			TT213#015	0	7.95752	0	0.942184	10.915	2.94828	50.1217	91.7112	176.378	300.353	413.897	592.157	864.706	1153.54		0.12605	502
TT213#016	0.3	0.034	0.0397	0.0017	0.022443	0.0551	0.0061	268	29	251	11	300	230	0.131	34	0.176	2.52	4.47	2.77	29.3	8.3	98	41	211	40.3	400	87	93.1	145			TT213#016	0.552743	55.5556	1.85263	5.39615	29.2157	47.7586	142.579	221.925	385.827	724.382	1274.92	1580.39	2352.94	3425.2		0.739973	251
TT213#017	0.272	0.022	0.0373	0.0012	0.37243	0.0515	0.0038	241	17	236.2	7.7	230	160	0.014	21.1	0.296	6.2	6.7	1.82	27.1	8.34	77.3	29.9	120	23.3	221	44.4	196	172			TT213#017	0.0590717	34.4771	3.11579	13.2762	43.7908	31.3793	131.873	222.995	304.331	528.269	725.076	913.725	1300	1748.03		0.412927	236.2
TT213#018	0.658	0.02	0.0815	0.002	0.52292	0.0584	0.0018	512	12	505	12	514	66		1.58		0.27	1.57		15.6	8.5	96	34.1	127	26	235	34	73	990			TT213#018	0	2.5817	0	0.578158	10.2614	0	75.9124	227.273	377.953	602.473	767.372	1019.61	1382.35	1338.58		0	505
TT213#019	0.676	0.031	0.0831	0.0021	0.66843	0.059	0.0024	524	18	515	13	521	89	0.024	2.72	0.159	2.66	6	0.32	20.7	6.9	60.5	20.2	90	18.5	153	29.3	104	413			TT213#019	0.101266	4.44444	1.67368	5.69593	39.2157	5.51724	100.73	184.492	238.189	356.89	543.807	725.49	900	1153.54		0.0877835	515
TT213#020	0.683	0.026	0.0839	0.0021	0.37183	0.0581	0.0023	526	15	519	12	521	93		0.48		0.66	2.33	0.006	22.9	8.33	84.8	32.4	110	20.2	162	24.7	44.3	400			TT213#020	0	0.784314	0	1.41328	15.2288	0.103448	111.436	222.727	333.858	572.438	664.653	792.157	952.941	972.441		0.00251119	519
TT213#021	0.308	0.024	0.0426	0.0014	0.14428	0.0529	0.0036	273	17	268.7	8.3	352	96	0.37	14.7	0.31	1.97	2.18	0.35	13.7	4.1	51	23.8	122	29.9	309	73	231	699			TT213#021	1.56118	24.0196	3.26316	4.21842	14.2484	6.03448	66.6667	109.626	200.787	420.495	737.16	1172.55	1817.65	2874.02		0.195796	268.7
TT213#022	0.659	0.021	0.0819	0.0019	0.3789	0.0574	0.0018	513	13	507	11	489	71	1.33	32.2	0.53	3	4.39	0.54	23.3	7.4	81.9	34.6	165	31.7	340	69.2	410	590			TT213#022	5.61181	52.6144	5.57895	6.42398	28.6928	9.31034	113.382	197.861	322.441	611.307	996.979	1243.14	2000	2724.41		0.163233	507
TT213#023	0.708	0.032	0.086	0.0026	0.54468	0.0591	0.0028	546	21	532	15	530	100		10		0.83	1.02	0.25	5.3	2.39	32.5	13.7	69.5	17.7	228	48.2	178	295			TT213#023	0	16.3399	0	1.7773	6.66667	4.31034	25.7908	63.9037	127.953	242.049	419.94	694.118	1341.18	1897.64		0.32872	532
TT213#024	0.428	0.051	0.0525	0.0021	0.12554	0.0568	0.0063	348	36	329	13	350	240	0.25	12.7	0.161	2.4	3.21	1.47	21.2	6.45	67	31.2	146	32.2	361	71.4	54.3	63			TT213#024	1.05485	20.7516	1.69474	5.13919	20.9804	25.3448	103.163	172.46	263.78	551.237	882.175	1262.75	2123.53	2811.02		0.544779	329
TT213#026	0.661	0.026	0.0817	0.0023	0.5323	0.0575	0.0017	513	16	506	14	499	69		12.7		0.17	1.15	0.2	10.1	3.42	40	20.9	99	22.8	234	53.3	161	636			TT213#026	0	20.7516	0	0.364026	7.51634	3.44828	49.1484	91.4439	157.48	369.258	598.187	894.118	1376.47	2098.43		0.179409	506
TT213#027	0.652	0.019	0.081	0.0015	0.58391	0.0569	0.0014	509	12	502.3	8.8	469	54		15.5	0.183	4.42	8.7	0.26	40.1	14.9	158	58.3	245	46.1	419	79.3	403	1063			TT213#027	0	25.3268	1.92632	9.46467	56.8627	4.48276	195.134	398.396	622.047	1030.04	1480.36	1807.84	2464.71	3122.05		0.0425564	502.3
TT213#028	0.677	0.027	0.0813	0.0026	0.1221	0.0589	0.0025	522	16	504	15	516	91		2.9	0.113	3.1	7.2	0.022	46.7	17.4	195	66.6	317	62.5	549	100.8	221	448			TT213#028	0	4.73856	1.18947	6.63812	47.0588	0.37931	227.251	465.241	767.717	1176.68	1915.41	2450.98	3229.41	3968.5		0.00366793	504
TT213#029	0.359	0.021	0.0471	0.0011	0.23439	0.0535	0.0031	309	16	296.8	6.6	290	130	0.21	16.7	0.095	1.12	2.03	0.34	20.1	6.43	86	39.3	188	50	438	96.2	124	241			TT213#029	0.886076	27.2876	1	2.39829	13.268	5.86207	97.8102	171.925	338.583	694.346	1135.95	1960.78	2576.47	3787.4		0.162726	296.8
TT213#030	0.671	0.032	0.081	0.0022	0.14315	0.0584	0.0027	517	19	502	13	520	100		9.5	0.61	8.7	10	1.35	42.7	10.1	98	32.7	122	20.1	195	31.3	164	337			TT213#030	0	15.5229	6.42105	18.6296	65.3595	23.2759	207.786	270.053	385.827	577.739	737.16	788.235	1147.06	1232.28		0.19973	502
TT213#031	0.314	0.04	0.0437	0.0019	0.19573	0.0533	0.0057	273	31	275	12	240	210	0.01	38.1	0.159	1.82	2.28	1.35	14.7	5.33	55.4	25.6	122	31.8	270	61	209	223			TT213#031	0.0421941	62.2549	1.67368	3.89722	14.902	23.2759	71.5328	142.513	218.11	452.297	737.16	1247.06	1588.24	2401.57		0.712904	275
TT213#032	0.618	0.03	0.0761	0.0021	0.28992	0.0573	0.0028	486	19	473	13	460	110		9.5	0.11	2.21	3.21	1.11	24.8	8.7	113	50.5	268	52.1	593	125	177	306			TT213#032	0	15.5229	1.15789	4.73233	20.9804	19.1379	120.681	232.62	444.882	892.226	1619.34	2043.14	3488.24	4921.26		0.380337	473
TT213#033	0.312	0.018	0.0421	0.0014	0.3538	0.0529	0.0029	274	14	265.5	8.4	300	130	0.22	12.1	0.262	4.33	7.4	0.87	44.8	14.8	157	68.1	303	57	548	105.6	199	244			TT213#033	0.92827	19.7712	2.75789	9.27195	48.366	15	218.005	395.722	618.11	1203.18	1830.82	2235.29	3223.53	4157.48		0.146079	265.5
TT213#034	0.301	0.02	0.0412	0.0011	0.04422	0.0521	0.0037	265	16	260.1	7.1	240	150		26.5	0.142	3.77	7.7	1.24	35.4	12.2	149	58.1	255	55.2	502	92	257	218			TT213#034	0	43.3007	1.49474	8.07281	50.3268	21.3793	172.263	326.203	586.614	1026.5	1540.79	2164.71	2952.94	3622.05		0.229614	260.1
TT213#035	0.256	0.012	0.03728	0.00093	0.14469	0.0493	0.0024	230.6	9.6	235.9	5.8	140	100	0.009	12.2	0.0042	0.26	0.94	0.129	9.5	3.76	45.6	21	118	28.5	312	58.2	215	717			TT213#035	0.0379747	19.9346	0.0442105	0.556745	6.14379	2.22414	46.2287	100.535	179.528	371.025	712.991	1117.65	1835.29	2291.34		0.131974	235.9
TT213#036	0.525	0.052	0.0644	0.0022	0.34596	0.0587	0.0057	423	36	402	13	390	200		10.9			0.4	0.153	4.2	1.79	21.4	11	59.6	13.2	149	34.4	40.4	99.3			TT213#036	0	17.8105	0	0	2.61438	2.63793	20.438	47.861	84.252	194.346	360.121	517.647	876.471	1354.33		0.360878	402
TT213#037	0.268	0.015	0.0395	0.00091	0.011253	0.0491	0.003	240	12	249.7	5.7	110	120		4.6	0.0026	0.68	1.56	0.199	13.8	4.73	56.5	24.3	122	27.2	282	61	113.1	349			TT213#037	0	7.51634	0.0273684	1.4561	10.1961	3.43103	67.1533	126.471	222.441	429.329	737.16	1066.67	1658.82	2401.57		0.131122	249.7
TT213#038	0.288	0.032	0.0378	0.0012	0.38325	0.0548	0.0059	251	25	238.9	7.7	230	210		23.4	0.017	0.66	2.2	0.91	14.1	4.74	45.3	18.3	71.8	16.8	161	30.4	75.2	104.7			TT213#038	0	38.2353	0.178947	1.41328	14.3791	15.6897	68.6131	126.738	178.346	323.322	433.837	658.824	947.059	1196.85		0.49951	238.9
TT213#039	0.294	0.013	0.04121	0.0008	0.039556	0.0516	0.0025	261	10	260.3	5	226	98	0.005	9.4	0.057	0.96	1.79	0.27	16.9	5.79	70.8	31.5	124	27.2	290	54.8	195	503			TT213#039	0.021097	15.3595	0.6	2.05567	11.6993	4.65517	82.2384	154.813	278.74	556.537	749.245	1066.67	1705.88	2157.48		0.150078	260.3
TT213#040	0.649	0.016	0.0817	0.0012	0.0037367	0.0572	0.0014	507	9.9	506.2	7.3	479	55		4.08	0.0021	0.35	1.23	0.017	8.2	3.52	50.8	20.9	103.6	24.8	242	47.9	195	947			TT213#040	0	6.66667	0.0221053	0.749465	8.03922	0.293103	39.9027	94.1176	200	369.258	625.982	972.549	1423.53	1885.83		0.0163649	506.2
TT213#041	0.679	0.044	0.0822	0.0022	0.14161	0.0593	0.0036	518	27	509	13	510	140		7.2		0.2	0.72	0.026	5.9	2.24	32.4	13.8	67.5	17.5	153	31	47.6	127.6			TT213#041	0	11.7647	0	0.428266	4.70588	0.448276	28.7105	59.893	127.559	243.816	407.855	686.275	900	1220.47		0.038566	509
TT213#042	0.637	0.021	0.081	0.0016	0.35188	0.0565	0.0014	499	13	502.1	9.3	452	57		11.1	0.25	3.83	9.3	0.44	35.4	10.8	121	42.4	163	32.4	287	47	384	592			TT213#042	0	18.1373	2.63158	8.20128	60.7843	7.58621	172.263	288.77	476.378	749.117	984.894	1270.59	1688.24	1850.39		0.0741367	502.1
TT213#043	0.29	0.02	0.03931	0.00094	0.092451	0.0537	0.0036	256	15	248.5	5.8	270	140		60.6	0.239	6	9.2	3.63	45.6	14.2	155	63	234	53.9	489	98.2	509	305			TT213#043	0	99.0196	2.51579	12.848	60.1307	62.5862	221.898	379.679	610.236	1113.07	1413.9	2113.73	2876.47	3866.14		0.541819	248.5
TT213#044	0.698	0.029	0.0869	0.0023	0.37458	0.0579	0.002	534	17	537	14	513	70		8		0.28	1.98	0.008	14.5	5.67	71.8	28.8	129	28.2	224	44.6	176	420			TT213#044	0	13.0719	0	0.599572	12.9412	0.137931	70.5596	151.604	282.677	508.834	779.456	1105.88	1317.65	1755.91		0.00456454	537
TT213#045	0.32	0.017	0.04346	0.00094	0.18318	0.0532	0.0026	280	13	274.2	5.8	320	100		8.4	0.021	1.18	2.03	0.61	13.2	4.89	62.5	24.9	106	24.3	250	59.4	192	493			TT213#045	0	13.7255	0.221053	2.52677	13.268	10.5172	64.2336	130.749	246.063	439.929	640.483	952.941	1470.59	2338.58		0.360262	274.2
TT213#046	0.681	0.026	0.0842	0.0018	0.36349	0.0589	0.0023	528	16	521	11	533	84		2.31	0.116	1.8	5.25	0.195	38	12	103	27.3	96	16.2	133	24.7	105.3	310			TT213#046	0	3.77451	1.22105	3.85439	34.3137	3.36207	184.915	320.856	405.512	482.332	580.06	635.294	782.353	972.441		0.0422072	521
TT213#047	0.535	0.018	0.069	0.0015	0.29766	0.057	0.002	436	13	430	8.8	457	76	0.5	21.7	0.238	1.45	2.27	0.82	14.5	4.79	56.1	21.1	80.3	20.1	199	45.7	192	438			TT213#047	2.1097	35.4575	2.50526	3.10493	14.8366	14.1379	70.5596	128.075	220.866	372.792	485.196	788.235	1170.59	1799.21		0.436959	430
TT213#048	0.263	0.027	0.0366	0.0011	0.055263	0.0525	0.0057	232	21	231.4	7	210	210	0.053	4.83	0.48	9.5	14.1	2.67	51.5	12.6	118	44.1	189	38.3	368	69.4	125	163.4			TT213#048	0.223629	7.89216	5.05263	20.3426	92.1569	46.0345	250.608	336.898	464.567	779.152	1141.99	1501.96	2164.71	2732.28		0.302916	231.4
TT213#049	0.685	0.022	0.0841	0.0033	0.74859	0.0593	0.0017	529	13	520	20	560	61	10.3	24	7.4	41	26.8	6.6	45	15.7	130	48.1	202	50.3	493	104	112	1370			TT213#049	43.4599	39.2157	77.8947	87.7944	175.163	113.793	218.978	419.786	511.811	849.823	1220.54	1972.55	2900	4094.49		0.581024	520
TT213#050	0.658	0.025	0.084	0.0016	0.31484	0.0564	0.002	513	16	520.2	9.6	454	78		3.9	0.026	1	4.1	0.15	32.6	11.4	139	55.2	264	56.7	520	101	177	684			TT213#050	0	6.37255	0.273684	2.14133	26.7974	2.58621	158.637	304.813	547.244	975.265	1595.17	2223.53	3058.82	3976.38		0.0396656	520.2
TT213#051	0.296	0.021	0.0421	0.001	0.061174	0.0517	0.0039	260	17	265.7	6.4	200	160		6.75		0.58	1.82	0.123	11.9	4.26	53.4	23.2	99.8	24.5	222	46.2	60.2	179.7			TT213#051	0	11.0294	0	1.24197	11.8954	2.12069	57.9075	113.904	210.236	409.894	603.021	960.784	1305.88	1818.9		0.0808015	265.7
TT213#052	0.315	0.017	0.04333	0.00081	0.36521	0.0541	0.0032	277	13	273.4	5	310	120		7.5	0.197	3.16	6	0.34	30.5	11.3	120	49.3	217	47.9	414	75.3	223	345			TT213#052	0	12.2549	2.07368	6.7666	39.2157	5.86207	148.418	302.139	472.441	871.025	1311.18	1878.43	2435.29	2964.57		0.0768382	273.4
TT213#053	0.666	0.023	0.0818	0.0019	0.2023	0.0595	0.0019	518	14	507	11	550	74		32.7		0.45	0.91	0.84	8.6	3.28	46.1	23	139	41.1	465	124.6	161	329			TT213#053	0	53.4314	0	0.963597	5.94771	14.4828	41.8491	87.7005	181.496	406.36	839.879	1611.76	2735.29	4905.51		0.91798	507
TT213#054	0.623	0.012	0.0795	0.0011	0.61154	0.05687	0.00098	492.6	8	493	6.7	476	38		7.1		0.63	2.47	0.007	19.8	8.09	97.1	42.9	206	46.1	418	84.8	380	1953			TT213#054	0	11.6013	0	1.34904	16.1438	0.12069	96.3504	216.31	382.283	757.951	1244.71	1807.84	2458.82	3338.58		0.00306014	493
TT213#055	0.281	0.023	0.0383	0.0013	0.067062	0.0544	0.0048	252	18	242.2	8.2	310	170		96.8	0.141	1.59	4.81	0.99	28	9.8	120	49	211	47.2	416	84.1	128.2	134.2			TT213#055	0	158.17	1.48421	3.40471	31.4379	17.069	136.253	262.032	472.441	865.724	1274.92	1850.98	2447.06	3311.02		0.2608	242.2
TT213#056	0.628	0.01	0.07922	0.00098	0.5409	0.05701	0.00084	494.2	6.5	491.4	5.9	484	33		11.1		0.56	2.56		19.7	6.13	78.1	27.1	123	26.4	245	47.8	444	2143			TT213#056	0	18.1373	0	1.19914	16.732	0	95.8637	163.904	307.48	478.799	743.202	1035.29	1441.18	1881.89		0	491.4
TT213#057	0.632	0.017	0.0803	0.0014	0.32411	0.0566	0.0014	498	11	497.9	8.5	455	57		4.32	0.088	2.15	5.05	0.38	22.7	7.4	76.6	28	123	25.1	216	43.7	212	519			TT213#057	0	7.05882	0.926316	4.60385	33.0065	6.55172	110.462	197.861	301.575	494.7	743.202	984.314	1270.59	1720.47		0.108505	497.9
TT213#058	0.616	0.021	0.079	0.0012	0.1898	0.0564	0.002	486	13	490.3	7.1	430	79	0.028	7.4	0.61	9.9	13.6	2.51	66.2	21	196	70	272	54.8	426	86.4	252	346			TT213#058	0.118143	12.0915	6.42105	21.1991	88.8889	43.2759	322.141	561.497	771.654	1236.75	1643.5	2149.02	2505.88	3401.57		0.25574	490.3
TT213#059	0.299	0.023	0.0399	0.0013	0.0091973	0.0532	0.0044	265	18	252.3	7.8	300	180		4.3		1.47	2.8	0.42	24.5	8.1	94	41.2	165	38	348	73.6	186	438			TT213#059	0	7.02614	0	3.14775	18.3007	7.24138	119.221	216.578	370.079	727.915	996.979	1490.2	2047.06	2897.64		0.155028	252.3
TT213#060	1.228	0.047	0.1318	0.0033	0.19253	0.0682	0.0031	815	23	798	19	815	89		35.7	0.038	1.19	3.58	1.05	23.3	9.9	123.9	55.1	262	60	612	137.2	109.9	125.8			TT213#060	0	58.3333	0.4	2.54818	23.3987	18.1034	113.382	264.706	487.795	973.498	1583.08	2352.94	3600	5401.57		0.351474	798
TT213#061	0.654	0.027	0.082	0.0015	0.024469	0.0572	0.0025	511	17	508.1	8.8	451	94		5.7	0.216	3.7	8.6	0.27	22	4.2	25.8	5.86	14.1	1.8	15.9	2.43	294	223			TT213#061	0	9.31373	2.27368	7.92291	56.2092	4.65517	107.056	112.299	101.575	103.534	85.1964	70.5882	93.5294	95.6693		0.0600104	508.1
TT213#062	0.618	0.027	0.0788	0.0012	0.28296	0.0566	0.0022	489	17	488.8	7.1	434	87		14.9		0.69	3.04	0.07	14.3	5.37	65.4	23.7	108	23	181	38.4	203	216.2			TT213#062	0	24.3464	0	1.47752	19.8693	1.2069	69.5864	143.583	257.48	418.728	652.568	901.961	1064.71	1511.81		0.0324576	488.8
TT213#063	0.632	0.034	0.0802	0.0018	0.21244	0.0567	0.0031	493	21	497	11	440	130		7.4	0.205	3.47	6	0.78	21.2	7.1	88.5	31	141	28	245	47.7	99.7	157.8			TT213#063	0	12.0915	2.15789	7.43041	39.2157	13.4483	103.163	189.84	348.425	547.703	851.964	1098.04	1441.18	1877.95		0.211434	497
TT213#064	0.272	0.019	0.0372	0.00094	0.076499	0.0535	0.004	244	15	235.5	5.9	300	160	0.39	36.1	0.34	4.1	4.58	1.81	16.4	4.27	37.4	11.5	52.2	13.6	136	35.2	348	388			TT213#064	1.64557	58.9869	3.57895	8.77944	29.9346	31.2069	79.8054	114.171	147.244	203.18	315.408	533.333	800	1385.83		0.63848	235.5
TT213#065	0.311	0.018	0.0418	0.00078	0.22283	0.0544	0.0033	275	14	264	4.8	320	130	0.028	7.9	0.419	6.9	15.1	1.91	68.2	21.6	226	89.1	340	64.6	573	116.2	196	283			TT213#065	0.118143	12.9085	4.41053	14.7752	98.6928	32.931	331.873	577.54	889.764	1574.2	2054.38	2533.33	3370.59	4574.8		0.18196	264
TT213#066	0.327	0.021	0.04353	0.00085	0.15787	0.0546	0.0035	287	16	274.6	5.2	340	140	0.051	13.1	0.101	1.47	3.9	0.131	22.7	8.26	98.3	37.9	167	36.2	318	64.2	134.5	210.6			TT213#066	0.21519	21.4052	1.06316	3.14775	25.4902	2.25862	110.462	220.856	387.008	669.611	1009.06	1419.61	1870.59	2527.56		0.0425647	274.6
TT213#067	0.307	0.026	0.0405	0.0013	0.081175	0.0558	0.0048	271	21	255.7	8.3	330	180	0.026	9.4	0.035	0.47	2.16	0.36	12.9	4.54	60.9	25.6	111.2	26.2	229	51.1	66.3	116.1			TT213#067	0.109705	15.3595	0.368421	1.00642	14.1176	6.2069	62.7737	121.39	239.764	452.297	671.903	1027.45	1347.06	2011.81		0.208499	255.7
TT213#068	0.385	0.024	0.053	0.0024	0.13511	0.0546	0.0038	328	18	333	15	310	140	0.6	103	1.85	24.6	29.3	7.5	87.1	21.5	185	57.6	208	43	364	74	244	225			TT213#068	2.53165	168.301	19.4737	52.6767	191.503	129.31	423.844	574.866	728.346	1017.67	1256.8	1686.27	2141.18	2913.39		0.453881	333
TT213#069	0.3	0.017	0.04081	0.00083	0.15976	0.053	0.0028	265	13	257.8	5.1	290	120		18	0.072	0.94	1.86	0.71	11.4	3.69	49.4	21.2	103.7	25.7	258	58.1	118.1	220			TT213#069	0	29.4118	0.757895	2.01285	12.1569	12.2414	55.4745	98.6631	194.488	374.558	626.586	1007.84	1517.65	2287.4		0.471382	257.8
TT213#070	0.295	0.01	0.04211	0.00072	0.2492	0.0513	0.0017	262.2	8.1	265.9	4.4	232	75	0.48	13.5	0.305	1.67	3.66	0.237	17.6	8.73	108	46.1	220	53.3	497	108.2	324	850			TT213#070	2.02532	22.0588	3.21053	3.57602	23.9216	4.08621	85.6448	233.422	425.197	814.488	1329.31	2090.2	2923.53	4259.84		0.0902766	265.9
TT213#071	0.609	0.021	0.077	0.0012	0.037685	0.0577	0.002	481	13	478.2	7.2	496	77	0.071	14.4	0.293	4.44	8.5	0.69	39.4	12.37	146	56.8	250	51.9	497	98.5	117.9	260.3			TT213#071	0.299578	23.5294	3.08421	9.50749	55.5556	11.8966	191.727	330.749	574.803	1003.53	1510.57	2035.29	2923.53	3877.95		0.11527	478.2
TT213#072	0.284	0.022	0.0407	0.0011	0.15232	0.0523	0.0043	254	19	257.1	7.1	210	170		4.24	0.036	1.44	4.07	0.84	22.1	5.88	76.6	27.8	122	27.5	237	49.1	51.8	118.6			TT213#072	0	6.9281	0.378947	3.08351	26.6013	14.4828	107.543	157.219	301.575	491.166	737.16	1078.43	1394.12	1933.07		0.270776	257.1
TT213#073	0.314	0.021	0.04178	0.00081	0.14339	0.0551	0.0038	276	16	263.8	5	350	150		9.5	0.035	1.16	2.73	0.35	16	5.87	71.2	27.5	122	30	303	58.8	124.5	286			TT213#073	0	15.5229	0.368421	2.48394	17.8431	6.03448	77.8589	156.952	280.315	485.866	737.16	1176.47	1782.35	2314.96		0.161901	263.8
TT213#074	0.2721	0.0071	0.03887	0.00059	0.28829	0.0513	0.0014	244	5.7	245.8	3.6	234	60	0.018	15	0.022	0.66	1.83	0.42	10.8	3.56	41.5	19.7	94.1	23.4	217	51.6	497	1089			TT213#074	0.0759494	24.5098	0.231579	1.41328	11.9608	7.24138	52.5547	95.1872	163.386	348.057	568.58	917.647	1276.47	2031.5		0.288825	245.8
TT213#075	0.622	0.02	0.0803	0.0013	0.49864	0.0566	0.0015	490	12	497.6	7.7	463	58		6.17	0.012	0.61	0.86		4.4	2.07	28.5	12.2	60.3	13.7	129	26.8	227	635			TT213#075	0	10.0817	0.126316	1.30621	5.62092	0	21.4112	55.3476	112.205	215.548	364.35	537.255	758.824	1055.12		0	497.6
TT213#076	0.2953	0.0091	0.04173	0.00054	0.28806	0.0516	0.0016	262.2	7.1	263.5	3.3	244	67		25.2	0.127	2.11	6.7	0.25	52.1	17.9	220	85.9	381	75.5	633	123.7	741	911			TT213#076	0	41.1765	1.33684	4.5182	43.7908	4.31034	253.528	478.61	866.142	1517.67	2302.11	2960.78	3723.53	4870.08		0.0409079	263.5
TT213#077	0.649	0.023	0.0828	0.0012	0.20931	0.0573	0.002	506	14	512.8	6.9	469	77	32	103	14.7	83	26.3	0.34	46.9	11.4	126	43.1	168	36.1	299	58.1	124.7	321			TT213#077	135.021	168.301	154.737	177.73	171.895	5.86207	228.224	304.813	496.063	761.484	1015.11	1415.69	1758.82	2287.4		0.0295964	512.8
TT213#078	0.661	0.022	0.0822	0.0011	0.37629	0.0582	0.0017	513	14	509	6.4	524	67		10.8	0.05	0.84	2.87	0.181	12.1	3.46	42.2	17.4	71.1	16.9	155	33.1	175	684			TT213#078	0	17.6471	0.526316	1.79872	18.7582	3.12069	58.8808	92.5134	166.142	307.42	429.607	662.745	911.765	1303.15		0.0939006	509
TT213#079	0.606	0.034	0.0794	0.0017	0.20516	0.0558	0.0031	477	21	492	10	390	120		6.4	0.191	2.28	3.8	0.93	15.5	5.7	64.9	24.4	119.3	26.4	239	54.9	93.1	168			TT213#079	0	10.4575	2.01053	4.88223	24.8366	16.0345	75.4258	152.406	255.512	431.095	720.846	1035.29	1405.88	2161.42		0.370466	492
TT213#080	0.304	0.012	0.04255	0.00072	0.30138	0.052	0.0019	270.6	9.7	268.6	4.5	268	82		3.48	0.058	0.28	1.52	0.115	9.9	4.46	60.1	27.2	143	35.8	374	80.3	139	601			TT213#080	0	5.68627	0.610526	0.599572	9.93464	1.98276	48.1752	119.251	236.614	480.565	864.048	1403.92	2200	3161.42		0.0906321	268.6
TT213#081	0.293	0.025	0.0388	0.0014	0.091542	0.0546	0.0046	258	20	245.4	8.5	350	180	0.6	5.6	0.16	1.45	1.57	0.63	11.2	3.45	39.7	13.6	68.4	17.4	150	35.7	59.8	199			TT213#081	2.53165	9.15033	1.68421	3.10493	10.2614	10.8621	54.5012	92.246	156.299	240.283	413.293	682.353	882.353	1405.51		0.459309	245.4
TT213#082	0.64	0.027	0.0808	0.0016	0.10812	0.0584	0.0027	502	17	500.7	9.5	486	97		20.7	0.281	4.58	8.1	1.9	27.9	8.62	90.9	30.7	139.2	25.2	231	45.7	144.6	222			TT213#082	0	33.8235	2.95789	9.80728	52.9412	32.7586	135.766	230.481	357.874	542.403	841.088	988.235	1358.82	1799.21		0.386396	500.7
TT213#083	1.062	0.022	0.1205	0.0014	0.41781	0.0637	0.0012	734	11	733.1	8.2	728	41	0.077	11.8	0.63	8.3	14.2	4.29	64.6	18.5	205	73	325	67.8	562	115.7	511	661			TT213#083	0.324895	19.281	6.63158	17.773	92.8105	73.9655	314.355	494.652	807.087	1289.75	1963.75	2658.82	3305.88	4555.12		0.433033	733.1
TT213#084	0.652	0.019	0.0818	0.0013	0.11114	0.0582	0.0019	508	12	506.8	7.6	503	72		1.19	0.075	1.05	3.49	0.08	31.4	12.2	157	59.2	260	53.4	436	86.5	103.4	410			TT213#084	0	1.94444	0.789474	2.24839	22.8105	1.37931	152.798	326.203	618.11	1045.94	1571	2094.12	2564.71	3405.51		0.0233634	506.8
TT213#085	0.298	0.011	0.04165	0.00067	0.2527	0.0519	0.0019	263.7	8.5	263	4.2	249	80	0.093	14.1	0.143	2.12	5.55	0.148	41.5	14.7	195	76.4	342	70	591	119.2	265	583			TT213#085	0.392405	23.0392	1.50526	4.53961	36.2745	2.55172	201.946	393.048	767.717	1349.82	2066.47	2745.1	3476.47	4692.91		0.0298136	263
TT213#086	0.32	0.034	0.0414	0.0016	0.2154	0.0561	0.0046	274	26	261.5	9.9	410	180	283	560	66	271	44.1	5.52	68.3	17.8	205	72.1	345	73.3	683	141.5	225	208.7			TT213#086	1194.09	915.033	694.737	580.3	288.235	95.1724	332.36	475.936	807.087	1273.85	2084.59	2874.51	4017.65	5570.87		0.307491	261.5
TT213#087	0.648	0.023	0.0834	0.0015	0.28952	0.0562	0.002	505	14	516.4	8.8	425	79		3.39	0.06	2.35	4.02	0.208	15.8	5.44	60.5	21.5	84	17.3	140.4	26.5	87.8	293			TT213#087	0	5.53922	0.631579	5.03212	26.2745	3.58621	76.8856	145.455	238.189	379.859	507.553	678.431	825.882	1043.31		0.0797894	516.4
TT213#088	0.278	0.011	0.03956	0.00067	0.16464	0.0509	0.002	248.3	8.6	250.1	4.1	207	85		69.5		0.97	2.65	0.61	19.3	7.79	126.4	52.6	253	64.3	637	136.4	304	738			TT213#088	0	113.562	0	2.07709	17.3203	10.5172	93.9173	208.289	497.638	929.329	1528.7	2521.57	3747.06	5370.08		0.260767	250.1
TT213#089	0.3144	0.0096	0.043	0.0011	0.38554	0.0533	0.0016	277	7.3	271.6	7	343	73	0.59	10.1	0.303	2.18	2.43	0.206	11.9	5.27	85	34.8	168	40.8	394	88.6	239	783			TT213#089	2.48945	16.5033	3.18947	4.66809	15.8824	3.55172	57.9075	140.909	334.646	614.841	1015.11	1600	2317.65	3488.19		0.117115	271.6
TT213#090	0.304	0.018	0.04148	0.00094	0.30645	0.0525	0.0029	267	14	261.9	5.8	270	120		3.63	0.081	1.62	4.53	0.56	16.8	4.9	62.4	23.3	89.9	21.8	200	45.3	68.7	215.5			TT213#090	0	5.93137	0.852632	3.46895	29.6078	9.65517	81.7518	131.016	245.669	411.661	543.202	854.902	1176.47	1783.46		0.196249	261.9
TT213#091	0.69	0.016	0.0872	0.0012	0.52301	0.0572	0.0012	532.1	9.7	539	7	485	46	0.86	10.4	0.35	2.27	3.81	0.042	19.6	7.72	107.6	41.9	178	37.8	337	66.8	396	1180			TT213#091	3.62869	16.9935	3.68421	4.86081	24.902	0.724138	95.3771	206.417	423.622	740.283	1075.53	1482.35	1982.35	2629.92		0.0148588	539
TT213#092	0.651	0.018	0.0822	0.0012	0.35298	0.0572	0.0015	508	11	509.4	7.4	479	57		4.63	0.23	5.2	8.5	0.46	39.4	12.4	135	51.9	202	38.1	335	64.8	273	596			TT213#092	0	7.56536	2.42105	11.1349	55.5556	7.93103	191.727	331.551	531.496	916.961	1220.54	1494.12	1970.59	2551.18		0.0768465	509.4
TT213#093	0.658	0.037	0.0836	0.0016	0.20282	0.0569	0.0031	509	22	517.6	9.6	420	120		1.77	0.103	1.27	4.47	0.44	28.7	12.2	171	67.1	307	60.5	535	109.3	59.2	159			TT213#093	0	2.89216	1.08421	2.71949	29.2157	7.58621	139.659	326.203	673.228	1185.51	1854.98	2372.55	3147.06	4303.15		0.118763	517.6
TT213#094	0.632	0.027	0.0797	0.0013	0.39525	0.0571	0.0022	494	17	494.5	8	464	89		54.9	0.067	1.78	4.87	0.62	29.9	9.43	124	49.5	204	43.2	374	75.8	238	303.7			TT213#094	0	89.7059	0.705263	3.81156	31.8301	10.6897	145.499	252.139	488.189	874.558	1232.63	1694.12	2200	2984.25		0.157078	494.5
TT213#095	0.679	0.019	0.0861	0.0014	0.14194	0.0569	0.0017	525	11	532.6	8.2	461	67		0.68	0.03	1.31	4.48	0.066	37.2	14.8	182	71.7	278	58.7	466	89.4	121.5	505			TT213#095	0	1.11111	0.315789	2.80514	29.281	1.13793	181.022	395.722	716.535	1266.78	1679.76	2301.96	2741.18	3519.69		0.0156299	532.6
TT213#096	1.499	0.048	0.1516	0.0047	0.49051	0.0724	0.0026	927	19	909	26	973	72		1.23	0.056	1.16	3.9	0.16	34.6	11.2	117	43.3	175	36	324	62.4	59.3	364			TT213#096	0	2.0098	0.589474	2.48394	25.4902	2.75862	168.37	299.465	460.63	765.018	1057.4	1411.76	1905.88	2456.69		0.0421088	909
TT213#097	0.554	0.031	0.0687	0.0014	0.06941	0.0573	0.0031	443	20	428.1	8.5	440	120		12.3	0.028	0.36	1.13	0.41	6.9	3.06	44.5	19.9	109.7	29.6	308	83.9	98.8	168.6			TT213#097	0	20.098	0.294737	0.770878	7.38562	7.06897	33.5766	81.8182	175.197	351.59	662.84	1160.78	1811.76	3303.15		0.448894	428.1
TT213#098	0.251	0.016	0.0355	0.001	0.12693	0.0503	0.003	225	13	224.7	6.3	180	120	0.115	89.3	0.85	13.1	22.8	7.3	97	26.3	292	99.9	383	75.3	637	129	346	215			TT213#098	0.485232	145.915	8.94737	28.0514	149.02	125.862	472.019	703.209	1149.61	1765.02	2314.2	2952.94	3747.06	5078.74		0.474562	224.7
TT213#099	0.283	0.019	0.03892	0.00094	0.081681	0.0528	0.0038	251	15	246.1	5.8	230	140		34.2	0.048	1.21	2.65	1.01	10.1	3.05	34.6	15.5	75.7	16.7	160	40.2	156	187.3			TT213#099	0	55.8824	0.505263	2.59101	17.3203	17.4138	49.1484	81.5508	136.22	273.852	457.402	654.902	941.176	1582.68		0.596845	246.1
TT213#100	0.233	0.025	0.0359	0.0012	0.1885	0.0477	0.0048	212	21	227.5	7.7	0	190		13.6	0.054	0.97	2.34	1.62	14.6	5.54	74.5	28	122.6	30.5	272	62.8	41.4	92.2			TT213#100	0	22.2222	0.568421	2.07709	15.2941	27.931	71.0462	148.128	293.307	494.7	740.785	1196.08	1600	2472.44		0.847333	227.5
TT213#101	0.643	0.03	0.0802	0.0014	0.050472	0.0579	0.0029	500	18	497.5	8.4	460	110		10.5	0.293	4.98	6.7	0.131	28.3	7.86	91.1	33.2	131	31.2	266	58.6	107.3	179			TT213#101	0	17.1569	3.08421	10.6638	43.7908	2.25862	137.713	210.16	358.661	586.572	791.541	1223.53	1564.71	2307.09		0.0290847	497.5
TT213#102	0.62	0.017	0.0792	0.0018	0.31687	0.0575	0.0013	489	10	491	11	493	53		27.7	0.073	1.77	5	1.04	26.2	9.9	115	47.2	202	49.7	483	105.4	568	944			TT213#102	0	45.2614	0.768421	3.79015	32.6797	17.931	127.494	264.706	452.756	833.922	1220.54	1949.02	2841.18	4149.61		0.277793	491
TT213#103	0.664	0.015	0.0831	0.001	0.40091	0.0573	0.0012	517.9	8.7	514.8	6.2	488	47	0.011	0.8	0.063	0.65	3.41	0.047	29.1	11.2	131	43.9	172	32.5	255	48.4	66.6	858			TT213#103	0.0464135	1.30719	0.663158	1.39186	22.2876	0.810345	141.606	299.465	515.748	775.618	1039.27	1274.51	1500	1905.51		0.0144244	514.8
TT213#104	0.935	0.072	0.1091	0.0066	0.2205	0.0634	0.0033	662	35	665	37	713	85		4.17		0.31	1.24	0.095	8.3	4.41	57.5	23	110.4	25	259	52	44.8	358			TT213#104	0	6.81373	0	0.663812	8.10458	1.63793	40.3893	117.914	226.378	406.36	667.069	980.392	1523.53	2047.24		0.090531	665
TT213#105	0.648	0.026	0.0803	0.0014	0.39508	0.058	0.0022	505	16	497.7	8.1	493	83		8.2	0.17	4.3	11.4	0.48	53.2	15	168	49.7	201	40.3	326	65.8	118.7	259			TT213#105	0	13.3987	1.78947	9.20771	74.5098	8.27586	258.881	401.07	661.417	878.092	1214.5	1580.39	1917.65	2590.55		0.0595877	497.7
TT213#106	0.265	0.017	0.03906	0.0008	0.063459	0.0499	0.0034	237	13	247	5	140	140		26.4		0.022	0.8	0.43	5.9	2.41	29.3	13.3	74.1	17.6	200	48.8	147.5	277			TT213#106	0	43.1373	0	0.0471092	5.22876	7.41379	28.7105	64.4385	115.354	234.982	447.734	690.196	1176.47	1921.26		0.605092	247
TT213#107	0.305	0.011	0.04235	0.00058	0.052057	0.0523	0.002	270.8	8.6	267.4	3.6	268	84	0.018	22.8	0.403	6.86	14.2	1.1	81.5	26.9	296	118	483	96.3	776	141.9	526	658			TT213#107	0.0759494	37.2549	4.24211	14.6895	92.8105	18.9655	396.594	719.251	1165.35	2084.81	2918.43	3776.47	4564.71	5586.61		0.0988538	267.4
TT213#108	0.304	0.016	0.04183	0.00089	0.051683	0.0529	0.0031	268	13	264.1	5.5	260	120	0.037	6.9	0.307	5.88	10.7	1.03	56.2	17.5	184	69.8	281	55.9	444	89.3	139.8	233			TT213#108	0.156118	11.2745	3.23158	12.591	69.9346	17.7586	273.479	467.914	724.409	1233.22	1697.89	2192.16	2611.76	3515.75		0.128411	264.1
TT213#109	0.287	0.024	0.0404	0.00093	0.035187	0.0518	0.0044	253	18	255.2	5.8	170	170	3.6	18.7	1.14	5.8	3.28	0.36	15.7	4.53	52.3	18.4	93.6	18.8	176	37.8	85	186.1			TT213#109	15.1899	30.5556	12	12.4197	21.4379	6.2069	76.399	121.123	205.906	325.088	565.559	737.255	1035.29	1488.19		0.15337	255.2
TT213#110	0.301	0.011	0.04119	0.00065	0.20587	0.0535	0.0021	266.8	8.6	260.2	4	313	81		18.9	0.246	3.2	7	0.59	37.9	13.27	178	61.2	266	57.2	528	106.8	370	555			TT213#110	0	30.8824	2.58947	6.85225	45.7516	10.1724	184.428	354.813	700.787	1081.27	1607.25	2243.14	3105.88	4204.72		0.110741	260.2
TT213#111	0.655	0.03	0.0805	0.0015	0.35812	0.0583	0.0024	508	18	498.9	8.8	507	92		8.4	0.077	1.36	4.42	0.56	20.1	6.44	92.3	37	157	35	311	63.1	143	267			TT213#111	0	13.7255	0.810526	2.91221	28.8889	9.65517	97.8102	172.193	363.386	653.71	948.64	1372.55	1829.41	2484.25		0.181636	498.9
TT213#112	0.529	0.044	0.0679	0.0022	0.19304	0.0571	0.0049	423	28	423	13	350	170		7.2		0.5	1.19	0.31	7.5	2.17	30.9	12.8	59.2	13.4	130	32.6	25.3	56.5			TT213#112	0	11.7647	0	1.07066	7.77778	5.34483	36.4964	58.0214	121.654	226.148	357.704	525.49	764.706	1283.46		0.317235	423
TT213#113	0.653	0.02	0.0823	0.0013	0.49683	0.0576	0.0017	509	13	510	7.8	501	62		14.7	0.122	2.18	3.64	0.4	16.7	4.04	41.6	15.4	59.4	11.9	104.2	19.8	150.2	345			TT213#113	0	24.0196	1.28421	4.66809	23.7908	6.89655	81.2652	108.021	163.78	272.085	358.912	466.667	612.941	779.528		0.156846	510
TT213#114	0.298	0.012	0.04159	0.00073	0.15505	0.0517	0.0022	263.9	9.6	262.6	4.5	254	93		13.9	0.0044	0.86	2.56	0.179	18.5	7.09	94.8	36.1	166	37.8	330	71.8	179	475			TT213#114	0	22.7124	0.0463158	1.84154	16.732	3.08621	90.0243	189.572	373.228	637.809	1003.02	1482.35	1941.18	2826.77		0.079519	262.6
TT213#115	0.275	0.029	0.0364	0.0016	0.20937	0.0555	0.0061	241	23	230.1	9.9	330	230	0.032	21.5	0.204	2.78	2.46	1.53	8.6	1.73	22.8	6.9	31.9	7.62	79	21	76.2	72.9			TT213#115	0.135021	35.1307	2.14737	5.95289	16.0784	26.3793	41.8491	46.2567	89.7638	121.908	192.749	298.824	464.706	826.772		1.01695	230.1
TT213#116	0.26	0.012	0.03736	0.00094	0.18199	0.0508	0.0023	233.6	9.3	236.4	5.8	201	99		13.9	0.025	0.3	1.18	0.55	10.6	4.59	70.2	32.7	169	46.6	449	109.6	114.7	466			TT213#116	0	22.7124	0.263158	0.642398	7.71242	9.48276	51.5815	122.727	276.378	577.739	1021.15	1827.45	2641.18	4314.96		0.475436	236.4
TT213#117	0.267	0.049	0.0386	0.0023	0.20734	0.0508	0.009	239	42	244	14	30	320		30.1	0.193	2.2	2.46	1.7	13.9	4.33	41.2	16.4	64.9	13.7	140	29.2	55	28.9			TT213#117	0	49.183	2.03158	4.71092	16.0784	29.3103	67.6399	115.775	162.205	289.753	392.145	537.255	823.529	1149.61		0.888787	244
TT213#118	0.302	0.011	0.0419	0.00082	0.3399	0.0522	0.0018	266.9	8.7	264.5	5.1	265	77		10	0.126	2.96	5.9	0.89	35.3	10.6	153	58.2	261	58.9	522	103	362	722			TT213#118	0	16.3399	1.32632	6.33833	38.5621	15.3448	171.776	283.422	602.362	1028.27	1577.04	2309.8	3070.59	4055.12		0.188539	264.5
TT213#119	0.265	0.02	0.036	0.0011	0.21423	0.0532	0.004	236	16	228.1	6.6	250	150	0.011	10.7	0.232	3.48	6.2	0.98	35.2	11.5	134	48.5	205	42.8	346	72.3	99.5	143.4			TT213#119	0.0464135	17.4837	2.44211	7.45182	40.5229	16.8966	171.29	307.487	527.559	856.89	1238.67	1678.43	2035.29	2846.46		0.202807	228.1
TT213#120	0.632	0.013	0.0798	0.0011	0.36615	0.0568	0.0012	496.5	7.9	494.6	6.3	484	48		22.9	0.08	1.86	4.41	0.87	23.2	8.02	91.8	39.6	176	39	343	79.1	389	697			TT213#120	0	37.4183	0.842105	3.98287	28.8235	15	112.895	214.439	361.417	699.647	1063.44	1529.41	2017.65	3114.17		0.262954	494.6
TT213#121	0.324	0.043	0.0434	0.0016	0.031284	0.0539	0.007	274	32	273.7	9.7	170	240	0.033	12.7	0.271	3.34	4.95	0.53	30.1	9	105.4	41.8	162	32.7	292	57.5	99	70.8			TT213#121	0.139241	20.7516	2.85263	7.15203	32.3529	9.13793	146.472	240.642	414.961	738.516	978.852	1282.35	1717.65	2263.78		0.132744	273.7
TT213#122	0.631	0.014	0.0805	0.0013	0.35527	0.0567	0.0013	495.8	9	499.2	7.8	463	52	0.038	8.3	0.079	1.34	2.39	0.181	11.4	4.01	51	18.7	80.6	17.2	159	31	192	869			TT213#122	0.160338	13.5621	0.831579	2.86938	15.6209	3.12069	55.4745	107.219	200.787	330.389	487.009	674.51	935.294	1220.47		0.106011	499.2
TT213#123	0.313	0.021	0.04262	0.00097	0.01195	0.0528	0.0037	274	16	269	6	260	150		13.3	0.0034	0.85	2.73	0.34	12.9	4.94	68.6	27.3	123	29.6	266	58.6	106.1	217			TT213#123	0	21.732	0.0357895	1.82013	17.8431	5.86207	62.7737	132.086	270.079	482.332	743.202	1160.78	1564.71	2307.09		0.175157	269
TT213#124	0.28	0.012	0.04048	0.00062	0.096177	0.0499	0.0023	249.8	9.8	255.8	3.8	180	100		7.8	0.273	4.69	8	1.12	47.1	16	198	73.8	325	73.9	613	128.4	278	475			TT213#124	0	12.7451	2.87368	10.0428	52.2876	19.3103	229.197	427.807	779.528	1303.89	1963.75	2898.04	3605.88	5055.12		0.176395	255.8
TT213#125	0.298	0.032	0.0385	0.0014	0.040424	0.0563	0.0068	258	25	243.6	8.6	260	230	0.011	40.7	0.46	7.2	9.4	2.96	34.8	8.21	76	23.7	79.7	17.1	149	26.3	125	93			TT213#125	0.0464135	66.5033	4.84211	15.4176	61.4379	51.0345	169.343	219.519	299.213	418.728	481.571	670.588	876.471	1035.43		0.500336	243.6
TT213#126	0.2929	0.0092	0.04107	0.0007	0.1252	0.0516	0.0018	264.3	7.6	259.4	4.3	253	80	1.76	20.4	0.94	7.3	7.8	0.37	40.2	13.2	166	64.5	309	71.1	598	127	319	605			TT213#126	7.42616	33.3333	9.89474	15.6317	50.9804	6.37931	195.62	352.941	653.543	1139.58	1867.07	2788.24	3517.65	5000		0.06388	259.4
TT213#127	0.664	0.025	0.0848	0.0013	0.17417	0.0565	0.0022	517	15	524.6	8	432	86		3.57	0.126	2.25	6.9		34.3	10	124	38.9	147	27	218	41.9	158	372			TT213#127	0	5.83333	1.32632	4.81799	45.098	0	166.91	267.38	488.189	687.279	888.218	1058.82	1282.35	1649.61		0	524.6
TT213#128	0.385	0.031	0.0497	0.0014	0.27551	0.056	0.0044	329	22	312.5	8.3	360	160	0.098	7.8	0.087	1.17	3.75	1.22	19.4	7.05	107.3	44.3	211	55.5	547	121.3	44.1	116.6			TT213#128	0.413502	12.7451	0.915789	2.50535	24.5098	21.0345	94.4039	188.503	422.441	782.686	1274.92	2176.47	3217.65	4775.59		0.437287	312.5
TT213#129	0.299	0.02	0.04	0.0012	0.046139	0.0554	0.0041	266	15	252.6	7.1	380	140	1.05	12.8	1.17	9.1	11.6	1.62	47	13.5	172	59.1	227	49.2	394	81	189	252			TT213#129	4.43038	20.915	12.3158	19.4861	75.817	27.931	228.71	360.963	677.165	1044.17	1371.6	1929.41	2317.65	3188.98		0.21211	252.6
TT213#130	1.112	0.064	0.1249	0.0052	0.68759	0.0649	0.0025	748	30	757	30	751	77		0.53	0.03	0.93	2.34	0.031	22.6	12	159	64.9	277	56.4	490	99.8	45.2	352			TT213#130	0	0.866013	0.315789	1.99143	15.2941	0.534483	109.976	320.856	625.984	1146.64	1673.72	2211.76	2882.35	3929.13		0.0130324	757
TT213#131	0.311	0.019	0.0426	0.001	0.29302	0.0528	0.003	273	14	268.8	6.3	280	130		7.4	0.022	0.93	2.9	0.46	18.1	6.04	84.6	29.4	132	31	270	60.2	91.8	258			TT213#131	0	12.0915	0.231579	1.99143	18.9542	7.93103	88.0779	161.497	333.071	519.435	797.583	1215.69	1588.24	2370.08		0.194108	268.8
TT213#132	0.307	0.055	0.0373	0.0021	0.18266	0.06	0.011	258	41	236	13	210	350	0.043	36.1	0.52	9.2	11.8	5.13	51.6	11.8	112	35	122.9	23.4	193	38	71.3	34.4			TT213#132	0.181435	58.9869	5.47368	19.7002	77.1242	88.4483	251.095	315.508	440.945	618.375	742.598	917.647	1135.29	1496.06		0.635587	236
TT213#133	0.666	0.014	0.08454	0.00093	0.14194	0.0569	0.0014	519.5	9.1	523.1	5.5	480	53	0.28	7.4	0.193	2.62	3.21	0.3	26.3	10.1	117	42.4	171	40.3	330	71.4	210	773			TT213#133	1.18143	12.0915	2.03158	5.61028	20.9804	5.17241	127.981	270.053	460.63	749.117	1033.23	1580.39	1941.18	2811.02		0.0998193	523.1
TT213#134	0.266	0.017	0.03883	0.00086	0.15885	0.0507	0.0035	237	14	245.6	5.4	160	140		18.2		0.56	1.76	1.03	9	3.29	37.6	15.3	69.5	18	155	37	136	221			TT213#134	0	29.7386	0	1.19914	11.5033	17.7586	43.7956	87.9679	148.031	270.318	419.94	705.882	911.765	1456.69		0.791195	245.6
The following data is compiled from Dong et al., 2018
16GW024-01	0.62118	0.01548	0.07818	0.00179	0.05816	0.00154		491	10	485	11	536	24	0.047364	16.8131	0.568401	10.997	21.4082	0.67923	109.242	34.2692	417.1	138.462	624.813	124.64	1313.09	203.656	903.215	2843.63			16GW024-01	0.199848	27.4724	5.98317	23.5482	139.923	11.7109	531.59	916.289	1642.12	2446.33	3775.31	4887.83	7724.04	8017.95		0.0429394	485
16GW024-02	0.93219	0.01988	0.10825	0.00103	0.06197	0.00132		669	10	663	6	673	29	0.0337232	111.62	0.240047	4.73931	12.3669	3.90218	65.1204	19.6185	236.844	85.2555	416.551	93.1037	1061.56	180.72	1374.81	1713.95			16GW024-02	0.142292	182.386	2.52681	10.1484	80.8295	67.279	316.888	524.558	932.456	1506.28	2516.93	3651.13	6244.46	7114.94		0.42038	663
16GW024-03	0.32735	0.04638	0.0407	0.00188	0.05873	0.00884		288	35	257	12	557	231	40.7137	153.328	15.7701	105.166	46.0033	2.94413	152.749	40.5653	464.133	152.687	693.713	133.571	1462.55	245.682	311.539	546.052			16GW024-03	171.788	250.536	166.001	225.195	300.675	50.7608	743.306	1084.63	1827.3	2697.65	4191.62	5238.08	8603.22	9672.53		0.107373	257
16GW024-04	0.30721	0.01503	0.04627	0.00068	0.04823	0.00236		272	12	292	4	111	84	1.89165	53.8585	0.968509	12.6116	24.5033	8.75324	161.311	49.5119	647.692	228.423	1019.54	195.048	2000.74	321.929	714.997	933.574			16GW024-04	7.98163	88.004	10.1948	27.0056	160.153	150.918	784.97	1323.85	2549.97	4035.74	6160.37	7648.93	11769	12674.4		0.425645	292
16GW024-05	0.31502	0.01577	0.04411	0.00067	0.05301	0.00277		278	12	278	4	329	86	1.63263	40.9311	1.83568	27.4226	41.4146	5.56048	187.258	54.0173	658.387	213.659	950.384	185.927	1911.36	300.718	678.686	565.989			16GW024-05	6.88872	66.8809	19.323	58.7207	270.683	95.8704	911.232	1444.31	2592.08	3774.9	5742.5	7291.26	11243.3	11839.3		0.193036	278
16GW024-06	0.22287	0.00925	0.03218	0.00043	0.05009	0.00207		204	8	204	3	199	72	0.31476	103.23	0.528528	7.44285	19.0651	2.92564	116.009	39.2428	527.004	191.842	915.195	188.487	2064.82	337.816	790.209	1425.02			16GW024-06	1.3281	168.676	5.56345	15.9376	124.608	50.4421	564.52	1049.27	2074.82	3389.43	5529.88	7391.65	12146	13299.8		0.190187	204
16GW024-07	1.06082	0.02549	0.12049	0.00164	0.06361	0.00141		734	13	733	9	729	29	1.64293	18.8817	2.03804	12.0499	13.3547	1.92748	77.6101	33.1655	419.678	131.391	576.252	114.249	1204.54	188.686	164.317	1955.8			16GW024-07	6.93219	30.8525	21.4531	25.8029	87.2859	33.2323	377.665	886.777	1652.27	2321.39	3481.89	4480.36	7085.54	7428.6		0.183036	733
16GW024-08	0.61016	0.0157	0.07751	0.00074	0.05678	0.00146		484	10	481	4	483	40	3.13618	36.2903	2.63844	22.4791	21.1529	2.96313	97.7494	28.7677	353.186	122.729	561.08	112.493	1216.01	194.619	880.147	1793.62			16GW024-08	13.2328	59.2979	27.773	48.1351	138.254	51.0884	475.666	769.191	1390.5	2168.36	3390.21	4411.5	7153.01	7662.18		0.19922	481
16GW024-09	0.8912	0.02023	0.10529	0.00104	0.06089	0.00138		647	11	645	6	635	32	0.0313481	1.3743	0.111472	1.74582	7.5357	0.112033	59.4963	28.6183	488.261	195.897	1019.75	218.572	2295.31	369	152.268	2582.91			16GW024-09	0.132271	2.24559	1.17339	3.73838	49.2529	1.9316	289.52	765.194	1922.29	3461.07	6161.6	8571.46	13501.8	14527.6		0.0161756	645
16GW024-10	0.67387	0.02176	0.08467	0.00101	0.0579	0.002		523	13	524	6	526	50	0.26932	16.8809	0.696264	10.3835	18.5715	6.07975	99.2789	29.7453	379.313	130.873	601.296	120.558	1256.52	209.498	401.291	654.717			16GW024-10	1.13637	27.5831	7.32909	22.2344	121.383	104.823	483.109	795.329	1493.36	2312.24	3633.21	4727.77	7391.28	8247.95		0.432869	524
16GW024-11	0.22058	0.01129	0.03191	0.00057	0.05177	0.00308		202	9	202	4	275	85	0.200863	75.4544	0.938347	15.4449	28.6156	8.06617	136.963	42.855	553.866	197.035	937.053	196.273	2142.86	358.068	525.914	600.585			16GW024-11	0.847523	123.292	9.87733	33.0727	187.03	139.072	666.488	1145.85	2180.57	3481.18	5661.95	7696.98	12605.1	14097.2		0.393901	202
16GW024-12	0.27616	0.01069	0.03888	0.00053	0.05157	0.00214		248	9	246	3	266	64	0.0156466	54.2874	0.2107	3.87592	8.00832	3.04792	38.0541	12.3593	167.958	65.0021	343.059	83.7229	1027.65	194.914	1120.86	1658.23			16GW024-12	0.0660193	88.7049	2.21789	8.29961	52.342	52.5504	185.178	330.462	661.253	1148.45	2072.86	3283.25	6045	7673.77		0.533772	246
16GW024-13	0.6675	0.03325	0.08308	0.00131	0.0587	0.0031		519	20	514	8	556	81	0.0141713	27.2532	0.107648	2.83035	5.44028	1.22424	35.4342	11.9146	167.42	63.014	310.394	67.7813	750.451	123.283	219.772	355.101			16GW024-13	0.0597946	44.5313	1.13313	6.06071	35.5574	21.1075	172.429	318.573	659.134	1113.32	1875.49	2658.09	4414.42	4853.66		0.269567	514
16GW024-14	1.44105	0.05317	0.14984	0.00217	0.06894	0.00212		906	22	900	12	897	52	0.355026	31.7642	0.421684	6.39639	11.7958	0.346902	80.0096	27.7458	376.121	134.896	631.601	126.968	1337.95	201.14	729.725	1516.33			16GW024-14	1.498	51.9024	4.43877	13.6968	77.0964	5.98107	389.341	741.866	1480.79	2383.32	3816.32	4979.14	7870.3	7918.92		0.0345221	900
16GW024-15	1.45839	0.03236	0.15073	0.00151	0.06934	0.00151		913	13	905	8	909	29	0.0767563	3.32123	0.255383	4.04781	16.2782	0.346041	140.816	55.7581	711.153	218.301	887.779	157.621	1501.85	209.223	284.261	1126.1			16GW024-15	0.323866	5.42685	2.68824	8.66769	106.393	5.96622	685.234	1490.86	2799.81	3856.92	5364.23	6181.22	8834.43	8237.13		0.0220964	905
16GW024-16	0.65862	0.01503	0.08071	0.00075	0.05869	0.00138		514	9	500	4	556	34	2.00186	30.0534	1.61076	15.99	27.3535	1.2716	158.714	51.568	670.725	235.851	1095.86	213.262	2196.4	342.063	1169.79	1929.57			16GW024-16	8.44666	49.1068	16.9554	34.2399	178.781	21.9241	772.33	1378.82	2640.65	4166.98	6621.53	8363.23	12920	13467.1		0.0590011	500
16GW024-17	0.29191	0.00783	0.04118	0.00039	0.05099	0.0014		260	6	260	2	240	44	0.0419762	38.6884	0.326134	7.13202	12.1444	1.95017	74.4006	25.891	349.525	130.218	663.284	146.451	1659.83	284.045	1077.7	2452.4			16GW024-17	0.177115	63.2163	3.43299	15.272	79.3752	33.6236	362.047	692.272	1376.08	2300.67	4007.76	5743.19	9763.69	11182.9		0.198344	260
16GW024-18	0.32592	0.01439	0.04105	0.0006	0.05753	0.00261		286	11	259	4	512	71	15.9614	135.375	4.98857	32.7887	23.3832	7.00066	111.665	36.5395	465.896	172.938	828.626	173.592	1938.05	319.338	793.246	899.597			16GW024-18	67.3478	221.201	52.5113	70.2114	152.832	120.701	543.382	976.991	1834.24	3055.44	5006.8	6807.53	11400.3	12572.4		0.418843	259
16GW024-19	0.33696	0.01324	0.04451	0.00056	0.05453	0.0021		295	10	281	3	393	65	1.32805	46.494	0.591068	6.87759	12.1857	1.8793	89.4858	31.1326	428.101	157.864	750.36	154.113	1682.64	267.408	725.316	870.937			16GW024-19	5.60357	75.9705	6.22177	14.7272	79.6448	32.4017	435.454	832.423	1685.44	2789.12	4533.89	6043.65	9897.89	10527.9		0.173988	281
16GW024-20	1.33853	0.03847	0.14302	0.00169	0.06757	0.00205		863	17	862	10	855	40	0.0608001	112.308	0.673114	8.73408	14.3867	7.88924	55.0341	17.4976	212.602	78.4339	406.971	91.6122	1141.37	214.703	787.087	1051.97			16GW024-20	0.256541	183.51	7.08541	18.7025	94.031	136.021	267.806	467.851	837.016	1385.76	2459.04	3592.63	6713.94	8452.88		0.857159	862
16GW024-21	0.32387	0.01716	0.04343	0.00078	0.05461	0.00313		285	13	274	5	396	86	0.0178238	17.9436	0.0676914	1.34459	2.28131	0.552416	24.2031	8.81009	131.715	53.0394	278.068	62.0882	722.301	123.361	342.949	658.45			16GW024-21	0.0752061	29.3196	0.712541	2.8792	14.9105	9.52442	117.776	235.564	518.563	937.092	1680.17	2434.83	4248.83	4856.72		0.227281	274
16GW024-22	0.60111	0.01645	0.07707	0.00084	0.05634	0.00159		478	10	479	5	466	41	0.0408563	42.8918	0.278084	5.49362	10.2415	0.512299	58.8213	18.801	252.819	88.055	418.526	82.4659	884.921	142.868	709.223	1096.31			16GW024-22	0.172389	70.0847	2.9272	11.7636	66.9379	8.83273	286.235	502.701	995.349	1555.74	2528.86	3233.96	5205.42	5624.72		0.0638113	479
16GW024-23	1.67568	0.03079	0.16634	0.00314	0.0724	0.00212		999	12	992	17	997	17	0	4.87831	0.886349	17.4493	37.8405	0.510091	216.659	109.365	1657.32	629.463	3220.13	676.748	6868.68	1070.88	214.732	1574.03			16GW024-23	0	7.9711	9.32999	37.3646	247.323	8.79467	1054.3	2924.2	6524.88	11121.3	19457	26539.1	40404	42160.7		0.0172228	992
16GW024-24	0.67659	0.01936	0.08417	0.00116	0.05807	0.00157		525	12	521	7	533	39	16.3713	68.3257	5.59638	30.0553	15.0699	1.00245	50.671	15.862	201.763	68.8532	327.674	69.0394	754.345	117.913	569.904	1948.77			16GW024-24	69.0773	111.643	58.9092	64.3582	98.496	17.2837	246.574	424.118	794.342	1216.49	1979.9	2707.43	4437.32	4642.26		0.110906	521
16GW024-25	0.28366	0.00826	0.0399	0.00048	0.05134	0.00145		254	7	252	3	256	45	5.80865	95.0636	2.23564	22.0104	24.2756	6.18865	115.743	34.6064	432.334	158.208	771.745	171.133	2004.75	346.638	2799.2	3243.68			16GW024-25	24.5091	155.333	23.5331	47.1316	158.664	106.701	563.224	925.304	1702.1	2795.19	4663.11	6711.12	11792.6	13647.2		0.356934	252
16GW024-26	0.23049	0.00894	0.03286	0.00043	0.05136	0.00205		211	7	208	3	257	65	2.11859	71.7176	0.772573	4.4249	6.8741	0.819458	38.513	15.1393	212.851	82.745	441.941	99.1492	1170.83	199.483	612.371	1321.62			16GW024-26	8.93918	117.186	8.13235	9.47516	44.9288	14.1286	187.411	404.795	837.994	1461.93	2670.34	3888.21	6887.25	7853.65		0.153971	208
16GW024-27	0.81042	0.02792	0.08765	0.00145	0.06659	0.00212		603	16	542	9	825	45	0.856719	13.5068	1.02844	7.5286	13.2644	1.17603	97.4912	40.3947	486.919	155.169	696.517	144.007	1630.1	287.365	287.578	2292.45			16GW024-27	3.61485	22.07	10.8257	16.1212	86.6954	20.2763	474.41	1080.07	1917	2741.51	4208.56	5647.32	9588.83	11313.6		0.0999802	542
16GW024-28	0.23019	0.01098	0.03314	0.00053	0.05017	0.00241		210	9	210	3	203	81	0.0296269	31.9742	0.279569	4.6328	9.24056	2.2611	53.8298	18.8488	264.441	102.981	546.818	124.918	1455.32	269.85	554.968	1056.46			16GW024-28	0.125008	52.2455	2.94283	9.92035	60.3958	38.9845	261.946	503.98	1041.11	1819.45	3304.04	4898.75	8560.69	10624		0.309944	210
16GW024-29	0.35189	0.01461	0.0472	0.00406	0.0587	0.0026		306	11	297	25	556	116	0.986521	27.3605	0.645252	3.32472	2.68111	0.815001	14.5618	4.64132	68.5102	29.1584	184.808	49.4673	687.264	134.446	279.496	953.494			16GW024-29	4.16254	44.7068	6.79213	7.11931	17.5236	14.0517	70.8605	124.099	269.725	515.167	1116.67	1939.9	4042.73	5293.16		0.398765	297
16GW024-30	0.33697	0.01873	0.04687	0.00105	0.05221	0.00298		295	14	295	6	295	86	0.0608725	1.73539	0.0700494	1.11802	5.57324	0.181638	44.8102	12.1875	111.124	26.6171	94.683	15.5034	143.894	20.4494	29.9218	886.043			16GW024-30	0.256846	2.83561	0.737362	2.39405	36.4264	3.13169	218.055	325.868	437.497	470.267	572.103	607.977	846.436	805.093		0.0351388	295
16GW024-31	0.22992	0.01124	0.03249	0.0005	0.05214	0.00275		210	9	206	3	292	84	0.0788567	75.6782	0.282138	6.48442	13.2956	3.35705	87.3067	28.3872	395.949	148.829	731.453	156.526	1726.25	291.058	441.164	681.181			16GW024-31	0.332729	123.657	2.96988	13.8853	86.8995	57.8802	424.85	759.015	1558.85	2629.49	4419.65	6138.26	10154.4	11459		0.301234	206
16GW024-32	0.31462	0.01347	0.04227	0.0006	0.05352	0.00236		278	10	267	4	351	71	1.41461	35.4178	1.99991	13.5606	7.91903	1.8314	45.1965	13.2269	178.574	62.1956	315.227	70.9211	831.11	144.809	670.533	1991			16GW024-32	5.96883	57.8723	21.0517	29.0377	51.7584	31.5759	219.934	353.661	703.046	1098.86	1904.7	2781.22	4888.88	5701.13		0.29595	267
16GW024-33	0.94688	0.02186	0.10737	0.00112	0.06307	0.00143		676	11	657	7	711	31	0	2.07154	0.045786	2.02949	10.4206	0.217533	88.1371	31.8647	347.902	97.8249	376.508	67.2481	656.092	97.6808	236.947	1528.52			16GW024-33	0	3.38487	0.481958	4.34581	68.1086	3.75057	428.891	851.996	1369.69	1728.36	2274.97	2637.18	3859.36	3845.7		0.0219444	657
16GW024-34	0.21882	0.01053	0.03017	0.00045	0.05203	0.00262		201	9	192	3	287	83	146.893	411.407	29.9212	116.53	40.0794	3.06206	197.425	64.9011	856.579	302.664	1379.7	270.281	2784.97	423.917	964.894	1993.18			16GW024-34	619.802	672.234	314.96	249.529	261.957	52.7942	960.707	1735.32	3372.36	5347.42	8336.55	10599.2	16382.2	16689.6		0.105239	192
16GW024-35	0.33604	0.03033	0.04003	0.00138	0.0598	0.00535		294	23	253	9	596	136	1.15883	28.5308	1.17344	11.9801	6.11504	1.99162	15.895	8.53995	110.622	52.8228	343.995	103.174	1409.28	257.07	177.066	1187.11			16GW024-35	4.88957	46.619	12.352	25.6533	39.9676	34.3383	77.3482	228.341	435.521	933.266	2078.52	4046.03	8289.89	10120.9		0.617589	253
16GW024-36	0.30022	0.01817	0.04193	0.00082	0.05294	0.00348		267	14	265	5	326	102	0.0243018	3.88526	0.0587238	0.966962	1.95191	0.652308	13.3067	5.04886	65.816	26.0842	131.449	29.897	357.384	64.3974	150.974	350.683			16GW024-36	0.102539	6.34846	0.618145	2.07058	12.7576	11.2467	64.7529	134.996	259.118	460.852	794.254	1172.43	2102.26	2535.33		0.391301	265
16GW024-37	0.27367	0.01272	0.03836	0.00058	0.05064	0.00234		246	10	243	4	224	79	0.0947355	74.2264	0.632249	11.8578	21.1014	3.39096	118.718	37.8121	496.837	178.379	820.2	167.106	1766.59	294.73	1727.96	2315.01			16GW024-37	0.399728	121.285	6.65525	25.3915	137.918	58.4649	577.701	1011.02	1956.05	3151.57	4955.89	6553.18	10391.7	11603.5		0.207126	243
16GW024-38	0.62194	0.01491	0.07906	0.00094	0.05598	0.00137		491	9	491	6	451	32	0.0446761	12.3469	0.387975	7.17896	18.9202	0.28162	113.733	38.0014	498.614	169.047	782.16	153.585	1562.87	244.286	806.92	1834.05			16GW024-38	0.188507	20.1746	4.08394	15.3725	123.661	4.85551	553.444	1016.08	1963.05	2986.7	4726.04	6022.95	9193.33	9617.55		0.0185601	491
16GW024-39	0.23037	0.00878	0.03116	0.00042	0.05284	0.0021		211	7	198	3	322	62	50.2359	152.064	13.1017	42.938	8.40378	1.39186	40.6299	14.9099	220.021	93.9767	563.63	139.497	1855.34	359.451	991.582	2241.74			16GW024-39	211.966	248.47	137.913	91.9444	54.9267	23.9976	197.712	398.661	866.223	1660.36	3405.62	5470.46	10913.8	14151.6		0.230281	198
16GW024-40	0.29504	0.00878	0.03956	0.00046	0.05301	0.00166		263	7	250	3	329	46	15.2641	95.775	8.28031	41.4956	20.5004	5.01877	63.6597	19.8138	250.451	93.8447	490.465	112.131	1322.33	243.983	1415.33	3490.78			16GW024-40	64.4054	156.495	87.1611	88.8557	133.99	86.5306	309.78	529.78	986.026	1658.03	2963.54	4397.29	7778.4	9605.65		0.424725	250
16GW024-41	0.24349	0.00721	0.03156	0.00038	0.05495	0.00173		221	6	200	2	410	45	2.43597	68.3762	2.70004	20.2555	19.8291	5.38382	82.9115	28.7179	384.014	143.913	746.73	167.992	1971.36	345.755	2018.66	2419.73			16GW024-41	10.2784	111.726	28.4214	43.3738	129.602	92.8245	403.462	767.857	1511.86	2542.62	4511.96	6587.93	11596.2	13612.4		0.405933	200
16GW024-42	0.71981	0.03534	0.08355	0.00121	0.06104	0.00309		551	21	517	7	641	81	0.327631	8.79417	0.527768	5.12272	11.5283	1.04263	84.5444	34.8911	495.48	175.46	833.826	161.013	1725.63	274.946	291.697	2831.28			16GW024-42	1.38241	14.3696	5.55545	10.9694	75.3483	17.9764	411.408	932.918	1950.71	3099.99	5038.22	6314.22	10150.8	10824.7		0.102101	517
16GW024-43	0.69329	0.03679	0.08144	0.00167	0.06179	0.00354		535	22	505	10	667	78	0.190482	8.5691	0.544919	6.43637	14.2292	1.35218	79.6474	25.7885	328.514	119.376	548.73	107.743	1162.73	190.701	178.56	285.859			16GW024-43	0.80372	14.0018	5.73598	13.7824	93.0013	23.3134	387.578	689.531	1293.36	2109.11	3315.59	4225.21	6839.61	7507.92		0.122795	505
16GW024-44	1.1526	0.03018	0.12586	0.00138	0.06523	0.00181		778	14	764	8	782	37	0.0649353	8.68356	0.275372	4.58312	8.38178	0.719692	39.9849	12.9781	169.584	57.7485	276.97	55.347	613.227	103.861	371.654	1049.04			16GW024-44	0.273989	14.1888	2.89865	9.81396	54.7829	12.4085	194.574	347.007	667.653	1020.29	1673.54	2170.47	3607.22	4089.01		0.120186	764
16GW024-45	0.2652	0.01119	0.0361	0.00049	0.05229	0.00223		239	9	229	3	298	72	10.5683	58.9766	4.04916	18.8793	11.6949	0.397404	48.0389	17.916	251.819	105.007	565.063	136.749	1697.73	275.331	787.56	2197.26			16GW024-45	44.592	96.367	42.6227	40.4267	76.4371	6.8518	233.766	479.038	991.415	1855.25	3414.28	5362.72	9986.64	10839.8		0.0512581	229
16GW024-46	0.32913	0.01029	0.04066	0.00046	0.05823	0.0019		289	8	257	3	539	49	0.2389	26.164	0.451703	6.37988	14.554	1.44255	86.7998	30.2837	408.757	153.281	756.542	161.109	1785.14	300.824	650.329	1541.24			16GW024-46	1.00802	42.7516	4.75477	13.6614	95.1243	24.8716	422.383	809.725	1609.28	2708.14	4571.25	6318.01	10500.8	11843.5		0.124081	257
16GW024-47	0.21466	0.0134	0.03086	0.0006	0.04984	0.00315		197	11	196	4	188	107	1.45071	22.0456	0.591779	6.05886	10.0353	1.00363	64.3258	23.0475	303.486	116.491	589.645	126.747	1372.85	223.455	542.799	1148.64			16GW024-47	6.12114	36.0223	6.22925	12.974	65.5899	17.3039	313.021	616.242	1194.83	2058.14	3562.81	4970.46	8075.59	8797.46		0.120765	196
16GW024-48	0.24424	0.01359	0.03372	0.00059	0.0527	0.00316		222	11	214	4	316	95	0.366636	90.5155	1.02177	13.2619	24.9843	5.21985	132.908	46.2695	627.73	243.261	1226.4	268.247	3064.79	524.279	962.964	1399.36			16GW024-48	1.54699	147.901	10.7555	28.3981	163.296	89.9975	646.753	1237.15	2471.38	4297.9	7410.24	10519.5	18028.2	20640.9		0.276932	214
16GW024-49	0.30113	0.0096	0.0427	0.00053	0.05099	0.00159		267	7	270	3	240	50	0.350042	47.8297	0.72217	7.05106	7.65952	1.50845	41.5484	14.7786	215.139	85.0767	479.737	116.323	1491.3	264.119	884.487	2415.25			16GW024-49	1.47697	78.1531	7.60179	15.0986	50.0622	26.0078	202.182	395.151	847.004	1503.12	2898.71	4561.68	8772.34	10398.4		0.25851	270
16GW024-50	0.2898	0.00895	0.03936	0.00039	0.05361	0.00178		258	7	249	2	355	52	51.1632	160.88	13.1186	61.0744	19.0058	1.05607	53.0495	18.7419	255.355	100.868	525.262	118.519	1408.75	240.756	856.061	2075.67			16GW024-50	215.879	262.875	138.091	130.78	124.221	18.208	258.149	501.121	1005.34	1782.12	3173.79	4647.8	8286.79	9478.57		0.101679	249
16GW024-51	0.22194	0.00919	0.03201	0.00042	0.05003	0.00206		204	8	203	3	197	72	5.52162	68.9508	2.45374	18.222	19.5357	4.91776	102.313	33.0716	424.887	152.798	755.58	157.786	1769.43	291.755	1572.26	1736.97			16GW024-51	23.298	112.665	25.8289	39.0193	127.684	84.7889	497.874	884.267	1672.78	2699.62	4565.44	6187.68	10408.4	11486.4		0.336288	203
16GW024-52	0.21812	0.01001	0.03009	0.00042	0.0534	0.00259		200	8	191	3	346	78	4.94324	238.037	4.78116	32.5682	21.873	4.32408	118.887	42.6517	610.428	234.474	1159.37	238.933	2567.12	412.759	737.317	1028.1			16GW024-52	20.8575	388.95	50.328	69.7392	142.961	74.5531	578.527	1140.42	2403.26	4142.65	7005.25	9369.92	15100.7	16250.3		0.259236	191
16GW024-53	0.27921	0.01204	0.03727	0.00049	0.05397	0.00229		250	10	236	3	370	73	3.22057	60.1113	2.64614	13.0373	12.4915	1.20071	64.4485	19.3765	293.568	110.122	591.891	133.293	1645.15	290.235	788.076	1854.9			16GW024-53	13.5889	98.221	27.8541	27.9171	81.6439	20.702	313.618	518.089	1155.78	1945.61	3576.38	5227.16	9677.38	11426.6		0.129375	236
16GW024-54	0.26744	0.01095	0.03822	0.00051	0.05087	0.00203		241	9	242	3	235	70	1.01481	32.6445	1.33098	12.935	21.3067	2.70996	108.723	35.3111	426.912	139.071	635.684	133.808	1542.79	240.285	686.159	1559.71			16GW024-54	4.28191	53.3407	14.0103	27.6981	139.26	46.7234	529.067	944.147	1680.75	2457.09	3840.99	5247.36	9075.24	9460.05		0.172134	242
16GW024-55	0.31529	0.01454	0.04161	0.00058	0.05495	0.00247		278	11	263	4	410	78	1.85212	226.598	2.65571	22.5415	28.4064	7.58573	108.581	34.1375	443.079	154.686	755.534	160.245	1802.43	299.129	1184.11	1128.47			16GW024-55	7.81484	370.259	27.9548	48.2688	185.663	130.788	528.377	912.766	1744.41	2732.98	4565.16	6284.11	10602.5	11776.7		0.417576	263
16GW024-56	1.46178	0.04399	0.15307	0.00198	0.06877	0.00188		915	18	918	11	892	41	5.90341	38.3476	1.66534	9.04981	7.08118	0.80979	35.0802	14.4891	218.257	88.9805	477.709	112.704	1349.71	228.389	374.024	1035.04			16GW024-56	24.9089	62.6594	17.5299	19.3786	46.2822	13.9619	170.707	387.41	859.278	1572.09	2886.46	4419.78	7939.48	8991.68		0.157077	918
16GW024-57	0.20758	0.00987	0.02998	0.00047	0.05079	0.00241		192	8	190	3	231	81	0.0116358	52.3379	0.309222	6.22858	12.4695	3.44565	72.0398	25.0179	355.271	138.397	741.192	169.964	2043.09	348.035	545.914	773.63			16GW024-57	0.0490964	85.5195	3.25497	13.3374	81.4997	59.4078	350.558	668.929	1398.71	2445.18	4478.5	6665.27	12018.2	13702.1		0.351468	190
16GW024-58	0.27539	0.00832	0.03917	0.00047	0.05088	0.00154		247	7	248	3	235	47	34.4524	90.8056	5.82775	21.1232	7.42018	0.762553	34.3198	12.5034	186.368	73.8996	396.433	92.3888	1124.68	184.168	943.158	2794.26			16GW024-58	145.369	148.375	61.3447	45.2318	48.4979	13.1475	167.007	334.315	733.733	1305.65	2395.36	3623.09	6615.75	7250.71		0.146088	248
16GW024-59	0.25019	0.00914	0.03536	0.00044	0.05139	0.00194		227	7	224	3	259	61	0.104659	38.2329	0.129273	2.11597	5.18665	0.565883	32.6008	12.5238	186.311	75.4888	420.979	101.728	1296.35	221.777	696.608	2261.88			16GW024-59	0.441601	62.4721	1.36077	4.53099	33.8997	9.7566	158.642	334.861	733.507	1333.72	2543.68	3989.34	7625.56	8731.39		0.133043	224
16GW024-60	0.2643	0.00854	0.0359	0.00042	0.05267	0.0017		238	7	227	3	314	52	15.8803	107.818	5.21795	25.8153	18.2963	1.73241	81.0063	27.2091	385.502	143.656	767.823	181.063	2281.53	360.94	1570.42	3201.02			16GW024-60	67.0054	176.173	54.9258	55.2791	119.584	29.8692	394.191	727.515	1517.73	2538.09	4639.41	7100.51	13420.8	14210.2		0.137573	227
16GW024-61	0.22444	0.01829	0.03162	0.00076	0.05424	0.0055		206	15	201	5	381	140	0.652726	26.0384	0.347776	4.58687	6.83037	1.10337	42.1494	16.2732	237.477	93.7068	488.611	113.515	1366.66	227.237	192.549	411.789			16GW024-61	2.75412	42.5464	3.6608	9.822	44.6429	19.0237	205.107	435.111	934.948	1655.6	2952.33	4451.57	8039.16	8946.32		0.198805	201
16GW024-62	0.65991	0.02092	0.08261	0.00109	0.05751	0.00187		515	13	512	6	511	46	1.14167	44.6025	0.599702	4.90655	6.35389	1.72264	40.1914	14.3949	195.515	73.0879	368.578	82.8283	981.328	156.183	567.767	930.155			16GW024-62	4.81719	72.88	6.31265	10.5065	41.5287	29.7006	195.579	384.89	769.745	1291.31	2227.06	3248.17	5772.52	6148.95		0.329557	512
16GW024-63	0.64323	0.02233	0.08137	0.00098	0.05667	0.00195		504	14	504	6	479	55	10.7832	59.0455	4.6511	26.6534	16.3162	0.451349	69.2421	23.4221	299.237	106.845	499.397	101.03	1075.82	156.359	335.965	753.914			16GW024-63	45.4987	96.4796	48.959	57.0738	106.642	7.78188	336.945	626.258	1178.1	1887.71	3017.5	3961.97	6328.36	6155.85		0.0410527	504
16GW024-64	0.26303	0.02597	0.03443	0.00092	0.0546	0.00517		237	21	218	6	396	175	1.22433	27.9934	0.845043	8.42926	9.90988	1.07797	74.7033	25.9508	395.664	167.276	1028.01	262.163	3339.78	569.648	575.715	2195.84			16GW024-64	5.16595	45.7409	8.89519	18.0498	64.7704	18.5858	363.52	693.872	1557.73	2955.41	6211.57	10280.9	19645.8	22427.1		0.121123	218
16GW024-65	0.27453	0.00867	0.03905	0.00051	0.05052	0.00169		246	7	247	3	219	49	0.0518505	29.4796	0.604723	9.24476	21.2992	2.97115	105.698	37.2355	484.751	169.348	817.185	166.644	1853.18	275.949	1541.96	3534.41			16GW024-65	0.218778	48.1693	6.36551	19.7961	139.211	51.2267	514.345	995.601	1908.47	2992.01	4937.67	6535.06	10901	10864.1		0.19144	247
16GW024-66	0.21944	0.00752	0.03098	0.00043	0.05172	0.00183		201	6	197	3	273	53	6.36941	91.4371	2.7979	18.717	17.3154	1.17023	83.9115	29.65	416.615	156.639	815.859	192.447	2348.41	338.119	1141.09	3114.46			16GW024-66	26.8751	149.407	29.4516	40.0791	113.173	20.1763	408.329	792.78	1640.22	2767.47	4929.66	7546.94	13814.2	13311.8		0.0938569	197
16GW024-67	0.69685	0.02143	0.08209	0.00131	0.06143	0.00159		537	13	509	8	654	39	0.460206	54.8462	0.832031	10.5091	20.0543	2.98806	87.5207	29.4416	374.807	128.451	679.399	170.589	2299.29	364.032	194.425	3968.02			16GW024-67	1.9418	89.6179	8.75823	22.5035	131.074	51.5183	425.891	787.209	1475.62	2269.44	4105.13	6689.75	13525.2	14332		0.218049	509
16GW024-68	0.28113	0.0165	0.03943	0.00073	0.05378	0.00332		252	13	249	5	362	99	8.07974	59.8328	2.07268	11.9651	6.82371	1.81841	28.0262	9.3106	132.861	50.9081	277.624	67.0261	879.695	144.443	318.819	534.931			16GW024-68	34.0917	97.7661	21.8177	25.6211	44.5994	31.352	136.38	248.947	523.074	899.436	1677.49	2628.47	5174.68	5686.72		0.401998	249
16GW024-69	0.20767	0.01193	0.03078	0.00062	0.04963	0.00295		192	10	195	4	178	95	1.50597	56.5939	1.55584	21.5046	28.461	7.03815	119.84	38.5807	488.58	171.204	842.727	184.56	2187.8	311.278	599.554	1022.81			16GW024-69	6.35429	92.4738	16.3772	46.0485	186.02	121.347	583.162	1031.57	1923.54	3024.8	5092	7237.66	12869.4	12255.1		0.368432	195
16GW024-70	0.22075	0.01694	0.03145	0.00088	0.05359	0.00476		203	14	200	6	354	123	0.439148	97.9478	0.924705	13.2943	21.8939	8.31978	115.553	35.7775	468.216	164.938	827.945	168.096	1940.79	332.104	482.881	459.052			16GW024-70	1.85295	160.045	9.73374	28.4674	143.098	143.444	562.303	956.616	1843.37	2914.1	5002.69	6591.99	11416.4	13074.9		0.505688	200
16GW024-71	0.27467	0.00873	0.03858	0.0005	0.05198	0.00161		246	7	244	3	284	49	0.405827	39.4637	0.51156	6.12788	8.73486	0.703401	62.7001	23.008	329.22	127.324	650.096	141.781	1666.3	252.884	869.146	2972.27			16GW024-71	1.71235	64.4831	5.38484	13.1218	57.0906	12.1276	305.11	615.188	1296.14	2249.54	3928.08	5560.03	9801.74	9956.06		0.0918893	244
16GW024-72	0.22003	0.01185	0.03063	0.00058	0.05163	0.00257		202	10	194	4	269	89	8.98436	86.3398	3.15671	17.7304	19.5081	3.80441	86.4273	28.5899	423.631	157.649	814.614	180.57	2168.83	336.507	1031.34	1924.68			16GW024-72	37.9087	141.078	33.2285	37.9665	127.504	65.5932	420.571	764.437	1667.84	2785.32	4922.14	7081.17	12757.8	13248.3		0.283255	194
16GW024-73	2.31007	0.08867	0.20669	0.0038	0.08183	0.0031		1215	27	1211	20	1241	47	0.00701489	7.74826	0.449323	8.03322	17.3811	1.61663	97.5062	30.1327	376.325	128.804	598.648	116.65	1295.87	193.372	77.6728	204.723			16GW024-73	0.0295987	12.6606	4.72972	17.2018	113.602	27.8729	474.483	805.686	1481.6	2275.68	3617.21	4574.52	7622.79	7613.07		0.120054	1211
16GW024-74	1.4364	0.08827	0.1477	0.00408	0.07449	0.00563		904	37	888	23	1055	79	0.290192	25.8508	0.142761	2.07698	2.42974	1.53455	15.2586	4.6847	55.2514	19.9326	100.314	23.2191	286.141	51.3836	71.2027	110.649			16GW024-74	1.22444	42.2399	1.50275	4.44749	15.8806	26.4577	74.2511	125.259	217.525	352.166	606.126	910.551	1683.18	2022.97		0.77049	888
16GW024-75	0.26583	0.01846	0.03802	0.00098	0.05052	0.0039		239	15	241	6	219	111	1.50773	128.201	1.34327	13.9167	16.7864	7.84557	49.9997	10.1446	105.718	33.7658	164.754	33.8697	430.711	72.7151	621.307	576.28			16GW024-75	6.36172	209.479	14.1397	29.8001	109.715	135.268	243.308	271.246	416.212	596.57	995.491	1328.22	2533.59	2862.8		0.827914	241
16GW024-76	1.27421	0.06159	0.13561	0.00238	0.06755	0.00376		834	27	820	14	855	71	0.0640409	7.27356	0.167172	2.35726	8.5373	0.366299	78.5238	29.6497	445.944	174.247	898.215	189.389	2108.58	328.702	431.062	2012.3			16GW024-76	0.270215	11.8849	1.75971	5.04767	55.7993	6.31549	382.111	792.773	1755.69	3078.57	5427.28	7427.01	12403.4	12941		0.0432512	820
16GW024-77	0.24203	0.01162	0.03334	0.00054	0.05272	0.00261		220	9	211	3	317	79	0.575666	40.9765	0.676354	7.48632	11.3633	2.32901	54.0556	18.7347	265.406	100.507	528.93	120.512	1476.68	238.389	452.819	1049.91			16GW024-77	2.42897	66.9551	7.11951	16.0307	74.27	40.1554	263.044	500.928	1044.91	1775.74	3195.95	4725.98	8686.37	9385.38		0.287292	211
16GW024-78	0.64031	0.01952	0.08246	0.00146	0.05567	0.00154		502	12	511	9	439	38	126.317	290.359	27.1019	114.039	28.6155	1.77319	91.5343	28.53	347.765	114.962	560.317	116.342	1335.41	191.023	1828.72	5160.13			16GW024-78	532.985	474.443	285.283	244.194	187.03	30.5723	445.422	762.833	1369.15	2031.12	3385.6	4562.42	7855.38	7520.6		0.105922	511
16GW024-79	0.27867	0.04004	0.03902	0.00212	0.05122	0.00638		250	32	247	13	251	223	0.920937	34.7383	0.927026	19.702	41.6847	6.34431	169.846	48.471	522.825	191.669	877.284	198.007	2312.2	304.317	685.55	1558.19			16GW024-79	3.88581	56.762	9.75817	42.1885	272.449	109.385	826.5	1296.02	2058.37	3386.39	5300.81	7764.97	13601.2	11981		0.230511	247
16GW024-80	0.20549	0.00977	0.02981	0.00048	0.0499	0.00249		190	8	189	3	190	81	0.0376539	54.0379	0.0829878	1.69399	5.12348	0.971171	30.0647	12.1783	173.915	69.512	377.522	91.4108	1131.46	180.467	480.173	1236.39			16GW024-80	0.158877	88.2972	0.873555	3.62739	33.4868	16.7443	146.3	325.622	684.703	1228.13	2281.1	3584.74	6655.64	7104.99		0.239226	189
16GW005-01	0.33615	0.01452	0.04646	0.00077	0.05218	0.00225		294	11	293	5	293	68	0.00948287	1.83038	0.039601	1.98711	5.43574	0.428306	37.0201	9.96212	103.003	24.3582	88.5485	15.3218	145.49	20.4136	42.8195	926.426			16GW005-01	0.0400121	2.99082	0.416853	4.25506	35.5277	7.38458	180.146	266.367	405.523	430.357	535.036	600.854	855.826	803.684		0.0923059	293
16GW005-02	0.91887	0.02693	0.10797	0.00222	0.06103	0.00129		662	14	661	13	640	31	0	2.33321	0.0479999	1.24756	5.25082	0.674678	36.393	15.2819	230.704	82.1668	384.236	76.3875	802.647	122.723	110.671	1135.61			16GW005-02	0	3.81243	0.505262	2.67143	34.3191	11.6324	177.095	408.607	908.282	1451.71	2321.67	2995.59	4721.45	4831.62		0.14921	661
16GW005-03	0.35454	0.01173	0.04908	0.00058	0.05273	0.0019		308	9	309	4	317	53	0.066715	2.05813	0.127694	1.45396	4.50821	0.664108	35.2869	15.2411	248.214	94.069	505.407	111.729	1266.12	212.17	43.9905	776.925			16GW005-03	0.281498	3.36295	1.34415	3.1134	29.4654	11.4501	171.712	407.517	977.222	1662	3053.82	4381.54	7447.75	8353.14		0.160973	309
16GW005-04	0.99272	0.0229	0.11381	0.00168	0.06305	0.0013		700	12	695	10	710	25	0.0072222	19.1441	0.0201069	1.61058	4.77937	0.311556	35.196	12.3157	177.199	63.4443	312.562	68.3706	745.717	113.513	387.382	1293.59			16GW005-04	0.0304734	31.2812	0.211651	3.44878	31.2377	5.37165	171.27	329.297	697.632	1120.92	1888.59	2681.2	4386.57	4469		0.0734392	695
16GW005-05	0.332	0.04509	0.04423	0.00187	0.05696	0.00829		291	34	279	12	490	227	7.42874	29.0485	2.10133	13.0467	19.2536	2.59691	72.5756	22.2479	262.524	82.2453	366.896	69.5521	706.781	114.196	139.654	291.357			16GW005-05	31.3449	47.4648	22.1193	27.9373	125.84	44.7742	353.166	594.862	1033.56	1453.1	2216.89	2727.53	4157.54	4495.91		0.212387	279
16GW005-06	0.30274	0.01224	0.0426	0.00073	0.05166	0.00208		269	10	269	5	270	61	0	3.75711	0.157437	3.3629	11.8958	0.584358	44.914	8.81656	71.8414	14.9779	49.8413	8.56627	79.3951	11.0387	110.558	1429.72			16GW005-06	0	6.13906	1.65723	7.20107	77.7503	10.0751	218.56	235.737	282.84	264.627	301.156	335.932	467.03	434.596		0.0772885	269
16GW005-07	0.70077	0.01598	0.08581	0.00098	0.05896	0.00134		539	10	531	6	566	30	0.019859	21.1958	0.118475	2.30059	8.02531	0.202321	60.7679	21.8825	326.929	122.957	602.547	129.868	1453.45	210.318	790.061	2508.56			16GW005-07	0.0837931	34.6336	1.2471	4.92632	52.453	3.48829	295.708	585.093	1287.12	2172.38	3640.77	5092.86	8549.71	8280.22		0.0280089	531
16GW005-08	0.52971	0.01638	0.06741	0.0007	0.05672	0.00175		432	11	421	4	481	50	0.0715612	41.8666	0.0972428	2.11398	6.71757	1.42166	46.4721	15.0952	206.527	69.6886	344.846	72.3297	840.371	140.052	610.696	1201.85			16GW005-08	0.301946	68.4095	1.02361	4.52672	43.9057	24.5114	226.142	403.614	813.098	1231.25	2083.66	2836.46	4943.36	5513.84		0.24599	421
16GW005-09	0.50322	0.01376	0.06571	0.0009	0.05646	0.00174		414	9	410	5	471	36	0.00514091	1.87598	0.0440347	2.08445	8.52913	0.657806	47.75	12.0974	96.944	19.3366	57.1822	8.1423	70.2827	8.03613	30.9845	938.772			16GW005-09	0.0216916	3.06533	0.463524	4.46348	55.7459	11.3415	232.36	323.461	381.669	341.636	345.512	319.306	413.428	316.383		0.0996512	410
16GW005-10	0.49721	0.01084	0.06416	0.00071	0.05595	0.00116		410	7	401	4	450	29	0.0224699	6.85652	0.0860159	1.37937	5.73323	0.95479	36.6481	11.6821	138.606	43.3461	208.577	45.2877	501.697	80.0236	123.791	2101.79			16GW005-10	0.0948097	11.2035	0.905431	2.95369	37.4721	16.4619	178.336	312.355	545.694	765.833	1260.28	1775.99	2951.16	3150.53		0.201375	401
16GW005-11	0.42531	0.01349	0.05647	0.0007	0.0548	0.00179		360	10	354	4	404	49	0.0562286	2.65073	0.149427	2.79801	9.83852	0.565039	45.2241	8.83586	66.7089	12.2815	34.6576	4.71457	39.6227	4.72174	48.6421	846.574			16GW005-11	0.237251	4.33126	1.57292	5.99145	64.3041	9.74205	220.068	236.253	262.634	216.988	209.412	184.885	233.075	185.895		0.081894	354
16GW005-12	0.59415	0.01455	0.07569	0.00072	0.05642	0.00131		474	9	470	4	469	37	0.0343658	3.9602	0.23321	4.9466	17.9775	0.66726	78.1513	14.5239	100.911	17.8386	52.3497	7.76281	61.9669	8.25847	190.744	2043.69			16GW005-12	0.145003	6.47091	2.45484	10.5923	117.5	11.5045	380.298	388.338	397.286	315.169	316.313	304.424	364.511	325.137		0.0544234	470
16GW005-13	1.09047	0.03419	0.12199	0.00248	0.06403	0.00156		749	17	742	14	743	34	0.0110299	41.2585	0.161216	4.26555	12.4013	1.64372	84.0476	27.8105	387.974	138.541	662.654	134.376	1391.61	217	274.116	890.491			16GW005-13	0.0465399	67.4159	1.69701	9.13393	81.0546	28.34	408.991	743.596	1527.46	2447.72	4003.95	5269.66	8185.94	8543.3		0.155652	742
16GW005-14	0.58746	0.02474	0.07517	0.00112	0.05681	0.00238		469	16	467	7	484	67	0.0392545	15.0669	0.0364286	2.16849	5.97595	1.81964	45.4249	17.9054	251.437	95.8069	497.735	102.379	1102.45	178.643	67.51	634.382			16GW005-14	0.165631	24.6191	0.383459	4.64345	39.0585	31.373	221.046	478.754	989.909	1692.7	3007.46	4014.85	6485.01	7033.21		0.337643	467
16GW005-15	0.29183	0.0077	0.04329	0.00041	0.04908	0.00135		260	6	273	3	152	44	0.0248202	2.73147	0.162386	2.67693	9.25357	0.31271	34.0756	9.35254	102.924	29.106	117.951	22.4465	229.214	34.6785	82.6958	1749.44			16GW005-15	0.104727	4.46318	1.70932	5.73219	60.4808	5.39155	165.818	250.068	405.212	514.24	712.692	880.257	1348.32	1365.3		0.053838	273
16GW005-16	0.59455	0.01124	0.07544	0.00075	0.05718	0.00109		474	7	469	4	498	24	4.10119	35.3598	6.6213	53.3794	48.643	7.40413	141.484	29.7452	215.421	32.8382	90.3846	11.7171	100.001	13.0245	169.13	3954.98			16GW005-16	17.3046	57.7775	69.6979	114.303	317.928	127.657	688.486	795.325	848.114	580.18	546.13	459.494	588.242	512.775		0.272856	469
16GW005-17	0.94784	0.03246	0.1097	0.00291	0.06198	0.00127		677	17	671	17	673	34	19.1314	85.1702	4.48024	23.0926	12.5957	1.59391	56.8962	18.2502	238.449	87.2927	461.452	106.106	1271.26	202.439	821.23	2667.87			16GW005-17	80.7233	139.167	47.1604	49.4489	82.3248	27.4811	276.867	487.974	938.774	1542.27	2788.23	4161.04	7478	7970.05		0.182026	671
16GW005-18	0.43888	0.00899	0.05746	0.00053	0.05522	0.00113		369	6	360	3	421	29	4.56501	38.0506	5.95607	50.775	44.6262	4.83142	141.702	28.3286	209.911	40.2853	118.812	19.1666	183.039	27.4181	279.819	6755.79			16GW005-18	19.2617	62.1742	62.6955	108.726	291.674	83.3003	689.546	757.449	826.419	711.754	717.898	751.63	1076.7	1079.45		0.185744	360
16GW005-19	1.27167	0.04386	0.13003	0.00288	0.07049	0.00198		833	20	788	16	943	37	0.141566	10.0481	0.546401	8.41208	16.746	1.48377	100.494	30.6231	383.848	127.072	575.383	113.572	1214.79	182.636	389.743	1604.75			16GW005-19	0.597323	16.4184	5.75159	18.013	109.451	25.5823	489.021	818.8	1511.21	2245.1	3476.63	4453.81	7145.83	7190.4		0.110577	788
16GW005-20	0.90702	0.02414	0.10121	0.00121	0.06483	0.00174		655	13	621	7	769	36	0.780023	142.25	0.390889	7.21095	17.4158	2.08183	95.7201	36.3058	512.486	186.879	939.138	193.91	2116.98	341.981	1894.61	2056.51			16GW005-20	3.29124	232.434	4.11463	15.441	113.829	35.8936	465.791	970.745	2017.66	3301.75	5674.55	7604.3	12452.8	13463.8		0.155882	621
16GW005-21	0.29725	0.01215	0.04152	0.00053	0.05222	0.00215		264	10	262	3	295	70	0.181331	2.61786	0.147959	2.58337	9.61552	0.639106	55.9714	11.8377	94.4168	19.1958	57.555	8.67235	74.9445	10.0197	43.6535	728.082			16GW005-21	0.765109	4.27754	1.55746	5.53184	62.8465	11.0191	272.367	316.517	371.72	339.149	347.764	340.092	440.85	394.476		0.0842223	262
16GW005-22	1.34056	0.2338	0.14193	0.00285	0.07302	0.01382		863	101	856	16	1014	340	0	29.8701	0.184535	2.57164	5.40003	1.78096	31.6456	11.427	160.227	64.9871	364.842	89.2702	1117.73	202.644	180.744	352.257			16GW005-22	0	48.8073	1.94248	5.50672	35.2943	30.7063	153.993	305.534	630.814	1148.18	2204.48	3500.79	6574.9	7978.12		0.416509	856
16GW005-23	0.55638	0.01319	0.07074	0.0007	0.05685	0.00139		449	9	441	4	486	35	0	2.24037	0.0401645	1.571	9.41259	2.08709	66.7712	26.1216	321.88	81.8626	308.258	50.7285	465.3	69.8036	30.6865	1806.56			16GW005-23	0	3.66074	0.422784	3.36403	61.5202	35.9842	324.921	698.439	1267.25	1446.34	1862.59	1989.35	2737.06	2748.17		0.254516	441
16GW005-24	1.60975	0.03627	0.15801	0.00163	0.07351	0.00165		974	14	946	9	1028	29	0.0538012	45.5482	0.229358	4.52649	7.33385	1.64665	47.0465	15.3997	213.396	73.8363	373.156	78.4579	883.273	142.126	525.697	923.932			16GW005-24	0.227009	74.4252	2.41429	9.69271	47.9336	28.3904	228.937	411.758	840.144	1304.53	2254.72	3076.78	5195.73	5595.53		0.271015	946
16GW005-25	1.55477	0.04006	0.1534	0.0018	0.07312	0.00182		952	16	920	10	1017	33	0	39.3541	0.0284998	1.16219	2.45887	0.952534	15.4281	5.24605	75.5443	29.6796	168.842	42.4803	564.031	105.039	310.133	513.92			16GW005-25	0	64.3041	0.299998	2.48862	16.071	16.423	75.0757	140.269	297.419	524.374	1020.19	1665.89	3317.83	4135.38		0.472804	920
16GW005-26	0.77593	0.01865	0.08756	0.00121	0.0639	0.00158		583	11	541	7	738	28	0.042302	49.0357	0.166842	3.38809	9.65989	1.67599	69.7681	27.5635	408.303	143.55	719.828	154.683	1757.14	263.57	740.068	2337.18			16GW005-26	0.17849	80.1237	1.75623	7.25501	63.1365	28.8964	339.504	736.991	1607.49	2536.21	4349.42	6066	10336.1	10376.8		0.19737	541
16GW005-27	0.65034	0.02694	0.07762	0.0021	0.0595	0.00169		509	17	482	13	586	46	0	10.2554	0.162856	2.99841	7.08089	1.74987	43.7876	17.5462	248.576	90.8094	463.679	104.04	1168.21	191.421	63.2041	904.264			16GW005-27	0	16.7571	1.71428	6.42059	46.2804	30.1701	213.078	469.15	978.644	1604.41	2801.69	4080.01	6871.83	7536.27		0.303815	482
16GW005-28	1.02856	0.02282	0.11131	0.00137	0.06664	0.00156		718	11	680	8	827	26	2.03024	27.0237	2.97602	27.3153	36.2702	3.42465	194.911	60.0009	763.067	260.74	1152.16	221.274	2311.14	319.333	1167.14	2157.24			16GW005-28	8.56642	44.1564	31.3265	58.4911	237.06	59.0457	948.472	1604.3	3004.2	4606.72	6961.7	8677.41	13594.9	12572.2		0.124522	680
16GW005-29	0.62351	0.01866	0.07629	0.001	0.05873	0.00173		492	12	474	6	557	42	0.028681	9.62305	0.183938	2.80205	6.66084	0.933414	46.5008	15.4945	202.234	71.6455	336.759	68.9024	746.452	123.211	376.529	2108.73			16GW005-29	0.121017	15.7239	1.93619	6.00012	43.5349	16.0933	226.281	414.291	796.195	1265.82	2034.8	2702.05	4390.9	4850.82		0.162145	474
16GW005-30	0.60526	0.01812	0.07799	0.001	0.05564	0.00159		481	11	484	6	438	44	0.02591	1.99675	0.025144	1.36692	5.6655	1.32354	43.3169	14.7643	184.28	56.862	256.769	53.6787	567.532	89.6947	47.1282	1780.33			16GW005-30	0.109325	3.26267	0.264674	2.92703	37.0294	22.8196	210.788	394.766	725.51	1004.63	1551.47	2105.05	3338.43	3531.29		0.258292	484
16GW005-31	1.10817	0.02811	0.12477	0.00151	0.06363	0.00153		757	14	758	9	729	33	0.0143296	3.73681	0.244352	5.11291	13.2893	0.74089	85.8912	30.2627	455.968	172.436	875.62	187.651	2056.83	331.017	230.637	972.815			16GW005-31	0.0604624	6.1059	2.57212	10.9484	86.8582	12.774	417.962	809.162	1795.15	3046.58	5290.76	7358.86	12099	13032.2		0.0670428	758
16GW005-32	0.73531	0.02847	0.08705	0.00243	0.0609	0.00179		560	17	538	14	636	40	0.459887	88.6921	1.20032	9.64971	12.0992	3.78534	55.0763	20.0726	280.694	108.098	567.32	130.623	1486.19	257.604	302.294	1134.39			16GW005-32	1.94045	144.922	12.635	20.6632	79.0797	65.2645	268.011	536.701	1105.1	1909.85	3427.92	5122.47	8742.3	10141.9		0.448299	538
16GW005-33	0.34678	0.01122	0.04726	0.00064	0.05306	0.00186		302	8	298	4	331	49	0	3.56425	0.113074	2.63485	8.67766	0.372614	35.7441	7.23625	65.5886	15.2672	54.2098	9.19584	80.1204	10.1312	222.242	1913.35			16GW005-33	0	5.82394	1.19025	5.64208	56.7167	6.42438	173.937	193.483	258.223	269.738	327.552	360.621	471.296	398.867		0.0646814	298
16GW005-34	0.60027	0.01412	0.07588	0.00079	0.05707	0.00138		477	9	471	5	494	34	0.0134323	1.97999	0.0979614	2.4236	11.2365	0.343257	49.9167	12.2536	113.647	24.9766	82.284	12.7603	107.965	14.802	51.1072	1344.35			16GW005-34	0.0566764	3.23528	1.03117	5.18973	73.4411	5.91822	242.904	327.636	447.427	441.283	497.184	500.406	635.09	582.757		0.0443103	471
16GW005-35	7.6254	0.21221	0.35117	0.00512	0.15628	0.00421		2188	25	1940	24	2416	28	0.0453734	33.0533	0.157902	2.51429	3.66519	0.215721	24.12	8.64605	115.042	41.0054	205.912	41.3453	459.689	72.8391	129.48	252.238			16GW005-35	0.191449	54.0087	1.66212	5.38392	23.9555	3.71932	117.372	231.178	452.923	724.478	1244.18	1621.38	2704.05	2867.68		0.070142	1940
16GW005-36	0.71273	0.02479	0.08417	0.00145	0.06095	0.00199		546	15	521	9	638	45	0	19.0972	0.201354	2.89338	9.03019	1.15765	50.6961	14.3338	162.676	49.2896	216.086	42.7137	443.102	64.48	198.913	863.66			16GW005-36	0	31.2045	2.11951	6.19568	59.0209	19.9594	246.696	383.257	640.458	870.84	1305.66	1675.05	2606.48	2538.58		0.165411	521
16GW005-37	0.31774	0.01234	0.04283	0.00065	0.05435	0.0022		280	10	270	4	385	60	0.00595919	1.52793	0.0414765	1.2806	5.60986	0.240822	34.1672	8.61938	79.0118	17.9161	62.7644	10.2958	96.1216	12.8887	34.6294	780.883			16GW005-37	0.0251442	2.49661	0.436595	2.74218	36.6657	4.1521	166.264	230.465	311.07	316.539	379.241	403.757	565.421	507.43		0.0531789	270
16GW005-38	2.53863	0.05954	0.18081	0.00206	0.10153	0.00246		1283	17	1071	11	1652	27	0.121965	118.414	0.832976	12.8639	19.681	4.13159	69.7731	17.1607	202.834	63.1871	289.604	59.4631	633.5	101.963	429.796	453.441			16GW005-38	0.514622	193.487	8.76816	27.5457	128.634	71.2343	339.528	458.843	798.558	1116.38	1749.87	2331.89	3726.47	4014.29		0.340858	1071
16GW005-39	1.49498	0.03379	0.14987	0.00176	0.07202	0.00165		928	14	900	10	987	27	0.0279554	28.7099	0.113431	1.81357	8.07738	0.697774	60.6123	23.1724	361.033	136.623	686.939	146.46	1644.27	258.206	529.008	1237.14			16GW005-39	0.117955	46.9116	1.19401	3.88346	52.7934	12.0306	294.951	619.582	1421.39	2413.84	4150.69	5743.53	9672.18	10165.6		0.0964101	900
16GW005-40	0.92542	0.05361	0.08524	0.00321	0.07416	0.00196		665	28	527	19	1046	60	0.0329077	10.8716	0.100778	1.89468	3.28189	1.03281	25.119	9.53205	134.437	48.0171	245.562	53.6567	580.603	92.9997	76.1946	1323.13			16GW005-40	0.138851	17.764	1.06082	4.05713	21.4502	17.8071	122.234	254.868	529.278	848.358	1483.76	2104.19	3415.31	3661.4		0.347762	527
16GW005-41	0.35034	0.0089	0.04785	0.00066	0.05294	0.00132		305	7	301	4	326	33	0.0358642	7.77003	0.269588	5.20589	12.0674	0.8014	27.5546	4.93806	35.907	7.58266	22.3827	3.58891	32.2221	4.22615	182.832	2620.69			16GW005-41	0.151326	12.6961	2.83777	11.1475	78.872	13.8172	134.086	132.034	141.366	133.969	135.243	140.741	189.542	166.384		0.13436	301
16GW005-42	0.71606	0.02439	0.0846	0.00105	0.06112	0.00211		548	14	524	6	643	52	0.101015	11.8263	0.147007	1.45215	5.04999	0.185556	36.4513	13.4032	196.078	73.7245	368.79	77.9218	815.934	130.419	359.178	900.44			16GW005-42	0.426225	19.3241	1.54744	3.10952	33.0065	3.19924	177.379	358.375	771.96	1302.55	2228.34	3055.76	4799.61	5134.61		0.0418115	524
16GW005-43	0.64102	0.01702	0.07928	0.00086	0.0584	0.00158		503	11	492	5	545	39	0	16.7692	0.0411833	1.60476	3.443	1.09719	25.7225	9.52092	139.479	50.8579	269.667	59.906	701.032	111.623	48.9638	1332.07			16GW005-43	0	27.4006	0.433508	3.43631	22.5033	18.917	125.17	254.57	549.129	898.549	1629.41	2349.26	4123.72	4394.6		0.356433	492
16GW005-44	1.01408	0.04591	0.11225	0.00187	0.06628	0.00324		711	23	686	11	815	67	2.37563	81.1141	2.98096	21.201	14.713	2.15976	75.7174	26.0948	394.422	156.198	783.952	173.34	1962.45	313.477	147.561	228.56			16GW005-44	10.0238	132.539	31.3785	45.3982	96.1633	37.2373	368.454	697.722	1552.84	2759.69	4736.87	6797.67	11543.8	12341.6		0.197825	686
16GW005-45	0.74495	0.01781	0.08654	0.00115	0.0621	0.00136		565	10	535	7	678	29	0.0457568	11.2142	0.152867	2.70869	8.27376	0.391578	54.9493	22.128	329.057	124.199	638.634	139.781	1577.79	248.596	675.293	2692.78			16GW005-45	0.193067	18.3239	1.60912	5.8002	54.0768	6.75135	267.393	591.656	1295.5	2194.34	3858.82	5481.61	9281.13	9787.24		0.0561449	535
16GW005-46	0.9461	0.02207	0.1091	0.00113	0.06264	0.00143		676	12	668	7	696	32	0.0300579	52.878	0.137026	2.93755	7.70692	1.46953	52.1475	16.3893	232.016	84.4232	429.362	95.8215	1057.14	180.157	720.364	1472.31			16GW005-46	0.126827	86.4019	1.44238	6.29027	50.372	25.3368	253.759	438.216	913.449	1491.58	2594.33	3757.7	6218.48	7092.8		0.224102	668
16GW005-47	0.684885	0.0200978	0.0803999	0.00135909	0.0613572	0.00150279		529.723	12.1172	498.509	8.11373	651.56	52.615	0.237421	8.82597	0.48556	8.61575	17.4449	2.75241	122.914	46.8501	726.857	262.583	1254.53	250.128	2651.75	412.289	476.519	1435.84			16GW005-47	1.00178	14.4215	5.11116	18.4491	114.019	47.4554	598.122	1252.68	2861.64	4639.27	7580.22	9808.92	15598.5	16231.8		0.18172	498.509
16GW005-48	0.2814	0.01774	0.03971	0.00055	0.05203	0.00334		252	14	251	3	287	119	0.0069096	2.46755	0.100713	2.47963	8.75927	0.501314	42.7027	10.8294	93.5924	21.347	73.5963	11.2358	107.639	13.0529	54.5446	531.068			16GW005-48	0.0291544	4.03195	1.06013	5.3097	57.2501	8.64335	207.799	289.556	368.474	377.156	444.691	440.621	633.169	513.895		0.079245	251
16GW005-49	0.354752	0.0172275	0.0453747	0.000988758	0.0562106	0.00244926		308.289	12.9137	286.062	6.09924	461.155	96.2875	0.0254897	2.30184	0.101574	1.77029	6.42843	1.00079	39.2202	12.0804	128.556	35.6742	148.76	26.2931	262.779	39.1511	30.5626	790.633			16GW005-49	0.107552	3.76117	1.0692	3.79078	42.0159	17.2551	190.853	323.005	506.127	630.287	898.851	1031.1	1545.76	1541.38		0.192691	286.062
16GW005-50	0.58667	0.02311	0.07466	0.00112	0.05706	0.0023		469	15	464	7	494	60	0.0194859	1.55638	0.0620826	2.14444	8.41413	0.308068	39.7126	9.63373	81.0875	18.4998	62.4677	9.6786	84.3306	11.334	32.4758	1084			16GW005-50	0.0822189	2.5431	0.653501	4.59194	54.9943	5.31152	193.248	257.586	319.242	326.851	377.448	379.553	496.062	446.222		0.0515231	464
16GW005-51	1.35942	0.05208	0.14441	0.00263	0.06875	0.0024		872	22	870	15	891	49	0.00762427	7.68719	0.264538	6.67025	13.9403	2.52009	90.3811	27.2523	336.757	117.492	545.634	108.869	1176.19	182.32	195.944	363.482			16GW005-51	0.0321699	12.5608	2.78461	14.2832	91.1132	43.4499	439.811	728.671	1325.82	2075.82	3296.88	4269.36	6918.77	7177.93		0.217052	870
16GW005-52	0.65268	0.0359	0.06582	0.00209	0.07133	0.00321		510	22	411	13	967	62	0.141285	9.85058	0.423001	7.86031	12.5927	4.23279	59.8911	24.3505	327.095	101.554	466.929	97.5605	1085.19	157.023	132.933	1757.17			16GW005-52	0.596139	16.0957	4.45265	16.8315	82.3053	72.9791	291.441	651.083	1287.77	1794.24	2821.33	3825.9	6383.45	6182.02		0.471204	411
16GW005-53	0.99653	0.02758	0.11053	0.00143	0.0653	0.00177		702	14	676	8	784	36	0.0119288	39.8722	0.165533	1.92352	8.44036	0.553005	64.4053	28.4906	421.597	171.857	919.339	198.606	2245.14	366.194	432.896	1261.69			16GW005-53	0.0503324	65.1507	1.74246	4.1189	55.1658	9.53457	313.408	761.78	1659.83	3036.34	5554.92	7788.47	13206.7	14417.1		0.0725123	676
16GW005-54	0.33375	0.01527	0.04387	0.00069	0.05524	0.00253		292	12	277	4	422	74	0.0377934	2.3549	0.131085	2.33578	10.7202	1.0329	46.2038	12.1278	91.5764	22.4117	76.7244	13.8211	145.801	23.0721	38.9226	845.044			16GW005-54	0.159466	3.84788	1.37984	5.00167	70.0665	17.8086	224.836	324.274	360.537	395.966	463.591	542.005	857.655	908.349		0.141886	277
16GW005-55	0.834	0.03035	0.08695	0.00165	0.06921	0.00227		616	17	537	10	905	44	0.0270938	16.9887	0.128394	3.98731	6.70404	0.199981	37.3616	9.85888	128.647	46.1679	234.151	47.0023	533.285	83.7505	229.541	1487.7			16GW005-55	0.11432	27.7593	1.35152	8.53813	43.8172	3.44795	181.808	263.606	506.485	815.688	1414.81	1843.23	3136.97	3297.26		0.0386306	537
16GW005-56	0.89017	0.02265	0.10447	0.00122	0.06145	0.00156		646	12	641	7	655	35	0.123162	42.0482	0.148693	2.57343	8.32197	1.22996	61.0762	24.988	331.985	127.881	665.151	139.331	1550.72	263.632	554.097	1639.84			16GW005-56	0.519671	68.7062	1.56519	5.51056	54.3919	21.2061	297.208	668.129	1307.03	2259.38	4019.04	5463.98	9121.9	10379.2		0.166788	641
16GW005-57	0.92866	0.01927	0.10696	0.00097	0.06251	0.00131		667	10	655	6	691	29	0.00632982	11.3435	0.171211	3.52039	10.6485	1	72.3477	31.1266	438.411	166.071	872.138	190.906	2199.28	353.794	384.532	2464.53			16GW005-57	0.0267081	18.5351	1.80223	7.5383	69.5978	17.2414	352.057	832.262	1726.03	2934.12	5269.72	7486.52	12937	13928.9		0.110146	655
16GW005-58	0.60408	0.01682	0.07718	0.00087	0.05628	0.00155		480	11	479	5	463	42	0	1.56118	0.0318761	0.912535	2.60579	0.809774	16.907	4.20534	34.3758	8.5091	28.7758	4.37354	44.5969	5.72461	41.0041	1643.86			16GW005-58	0	2.55095	0.335538	1.95404	17.0313	13.9616	82.2724	112.442	135.338	150.337	173.872	171.512	262.334	225.378		0.372979	479
16GW005-59	1.00253	0.04579	0.10616	0.00385	0.06763	0.00211		705	23	650	22	857	44	2.34102	49.1594	4.28691	31.2261	29.7907	5.33577	108.573	32.0139	374.608	129.242	611.479	119.822	1291.64	204.061	403.318	1011.26			16GW005-59	9.87772	80.3259	45.1254	66.8653	194.71	91.996	528.336	855.987	1474.84	2283.42	3694.74	4698.9	7597.89	8033.91		0.286826	650
16GW005-60	1.0065	0.02759	0.1125	0.00149	0.06439	0.00179		707	14	687	9	754	36	0.0243547	30.1435	0.169776	4.19222	9.03298	1.69618	48.0569	17.7071	239.034	92.6912	484.202	109.958	1306.9	226.104	533.938	1180.85			16GW005-60	0.102763	49.2541	1.78712	8.97692	59.0391	29.2445	233.853	473.451	941.077	1637.65	2925.69	4312.09	7687.65	8901.73		0.248887	687
16GW005-61	0.31188	0.01113	0.04203	0.00068	0.05342	0.00182		276	9	265	4	347	52	0.0206465	1.71225	0.0715661	1.63595	5.28473	0.383943	32.3054	11.3021	141.422	45.007	204.515	38.0845	398.313	60.9286	59.282	1216.09			16GW005-61	0.0871159	2.79779	0.753328	3.50311	34.5407	6.6197	157.204	302.196	556.778	795.176	1235.74	1493.51	2343.02	2398.76		0.0898341	265
16GW005-62	1.06785	0.04074	0.11484	0.00324	0.0665	0.00187		738	20	701	19	822	38	0.884616	65.4715	1.54922	11.8175	16.4711	2.3761	73.8737	24.0838	330.821	125.851	625.553	132.691	1547.22	243.462	411.522	1059.43			16GW005-62	3.73256	106.98	16.3076	25.3051	107.654	40.9673	359.483	643.951	1302.45	2223.51	3779.78	5203.58	9101.27	9585.1		0.208249	701
16GW005-63	0.34003	0.01404	0.04602	0.0012	0.0536	0.00213		297	11	290	7	354	49	0	1.74638	0.0664695	1.75842	8.84266	0.295873	53.3981	11.5684	89.619	16.3724	49.8203	6.77027	59.4811	7.43532	32.0193	1073.13			16GW005-63	0	2.85357	0.699679	3.76534	57.7952	5.10125	259.845	309.316	352.831	289.265	301.029	265.501	349.889	292.729		0.0416269	290
16GW005-64	0.62998	0.0115	0.07853	0.00075	0.05718	0.00102		496	7	487	4	499	24	9.16667	54.2617	10.192	76.3224	62.4348	8.30099	172.053	39.0538	297.644	65.3523	223.919	37.4735	351.416	50.5009	220.683	9718.52			16GW005-64	38.678	88.6629	107.284	163.431	408.071	143.121	837.242	1044.22	1171.83	1154.63	1352.99	1469.55	2067.15	1988.22		0.244855	487
16GW005-65	0.311	0.02063	0.03961	0.00068	0.05548	0.00345		275	16	250	4	432	118	0.292802	2.95447	0.338214	3.1944	8.81701	1.01701	41.1542	12.3305	113.993	25.9431	83.6395	12.5603	120.678	16.1098	33.8688	789.879			16GW005-65	1.23545	4.82757	3.56015	6.84026	57.6275	17.5347	200.264	329.693	448.791	458.359	505.375	492.559	709.873	634.243		0.163223	250
16GW005-66	0.93218	0.03214	0.10388	0.00161	0.0643	0.00234		669	17	637	9	752	47	0.581034	15.9091	0.420107	7.81595	16.5023	0.50933	77.2797	22.2574	269.755	89.7444	429.597	80.8061	833.526	132.65	637.682	1193.29			16GW005-66	2.45162	25.9952	4.42218	16.7365	107.858	8.78155	376.057	595.119	1062.03	1585.59	2595.75	3168.87	4903.09	5222.43		0.0436032	637
16GW005-67	1.1156	0.04525	0.11039	0.00254	0.07184	0.00235		761	22	675	15	982	46	0.125856	48.7229	0.327001	6.12478	16.6465	4.31585	116.745	41.4136	562.39	205.325	985.265	185.592	1934.15	288.65	160.98	526.895			16GW005-67	0.531038	79.6126	3.44212	13.1152	108.801	74.4112	568.101	1107.31	2214.13	3627.64	5953.26	7278.12	11377.4	11364.2		0.299302	675
16GW005-68	1.02974	0.0275	0.11303	0.00147	0.06546	0.00174		719	14	690	9	789	34	0.0419775	33.2509	0.138141	2.78939	6.05951	0.995448	30.6807	9.9352	123.883	42.0755	195.937	39.2817	443.729	70.4378	272.638	418.896			16GW005-68	0.17712	54.3315	1.45412	5.973	39.6046	17.1629	149.298	265.647	487.728	743.383	1183.91	1540.46	2610.17	2773.14		0.223198	690
16GW005-69	0.75637	0.05079	0.08628	0.00199	0.06249	0.00381		572	29	534	12	691	104	5.20716	32.1041	2.12648	6.44958	4.56254	0.220426	42.2672	9.25774	143.839	51.6654	268.364	53.0736	635.164	95.2783	462.921	1469.7			16GW005-69	21.9711	52.4577	22.384	13.8107	29.8205	3.80045	205.68	247.533	566.296	912.816	1621.53	2081.32	3736.26	3751.12		0.0485268	534
16GW005-70	0.58601	0.01248	0.075	0.00191	0.0575	0.00167		468	8	466	11	511	25	0.00594693	2.6894	0.131824	1.89185	9.16712	0.399899	41.4004	7.74208	46.4551	7.53362	19.3688	2.51095	18.2665	2.01568	89.9629	2170.02			16GW005-70	0.0250925	4.39444	1.38762	4.05107	59.9158	6.89481	201.462	207.007	182.894	133.103	117.032	98.4686	107.45	79.3573		0.062756	466
16GW005-71	0.26716	0.01385	0.03633	0.00065	0.05434	0.00307		240	11	230	4	385	84	0.0133163	1.62411	0.0368948	1.12603	1.77706	0.505065	25.833	10.425	138.704	42.1832	186.02	33.5668	336.026	52.2114	27.4939	676.075			16GW005-71	0.0561871	2.65378	0.388366	2.4112	11.6148	8.70802	125.708	278.743	546.077	745.287	1123.99	1316.34	1976.62	2055.57		0.227894	230
16GW005-72	0.71586	0.01922	0.08301	0.00139	0.06153	0.00127		548	11	514	8	658	30	7.00743	33.7191	0.319937	3.63647	9.71452	1.04216	59.1536	21.5194	283.166	103.662	526.487	110.815	1242.17	189.085	795.13	2849.23			16GW005-72	29.5672	55.0966	3.36776	7.78686	63.4936	17.9683	287.852	575.386	1114.83	1831.49	3181.19	4345.69	7306.91	7444.29		0.13291	514
16GW005-73	0.668866	0.0198648	0.0799306	0.00152955	0.0598621	0.00134849		520.023	12.0914	495.708	9.13424	598.17	52.7675	0.0427152	33.6166	0.152786	3.90611	10.224	1.56149	61.4214	20.8727	279.386	104.732	536.096	116.836	1356.5	211.548	270.344	1426.13			16GW005-73	0.180233	54.9292	1.60827	8.36425	66.8236	26.9223	298.888	558.094	1099.94	1850.39	3239.25	4581.8	7979.41	8328.65		0.190499	495.708
16GW005-74	0.95068	0.01724	0.10892	0.0011	0.0628	0.00109		678	9	666	6	701	22	0.040495	4.68433	0.126177	2.47248	9.69326	1.24716	78.4571	34.5447	511.68	194.526	1021.7	218.755	2560.7	416.629	291.509	2912.32			16GW005-74	0.170865	7.65413	1.32817	5.29439	63.3546	21.5028	381.786	923.656	2014.49	3436.85	6173.43	8578.61	15062.9	16402.7		0.13826	666
16GW005-75	0.57751	0.0123	0.07478	0.00078	0.05578	0.00119		463	8	465	5	444	29	0.0065488	5.45624	0.0449964	0.632979	1.22458	0.2595	4.67513	1.50386	14.095	4.27204	16.8097	3.46816	33.0414	4.95749	379.562	1685.19			16GW005-75	0.0276321	8.91543	0.473646	1.35542	8.00381	4.47414	22.75	40.2102	55.4922	75.4777	101.569	136.006	194.361	195.177		0.331566	465
16GW005-76	4.92499	0.17957	0.32124	0.00589	0.11032	0.00377		1807	31	1796	29	1805	40	43.5698	261.885	13.0814	56.9223	10.5972	1.41605	22.9669	7.47858	91.2823	39.6381	236.466	59.967	840.656	172.831	208.542	274.371			16GW005-76	183.839	427.917	137.699	121.889	69.2629	24.4146	111.761	199.962	359.379	700.319	1428.8	2351.65	4945.03	6804.37		0.277494	1796
16GW005-77	0.59844	0.01381	0.07547	0.0008	0.05706	0.00126		476	9	469	5	494	32	0.0125031	2.22183	0.13416	2.31502	11.0816	0.999338	55.4603	12.9816	88.4848	16.7004	47.6999	6.78861	57.288	7.61242	35.8248	2252.26			16GW005-77	0.0527559	3.63044	1.41221	4.95722	72.4286	17.23	269.88	347.103	348.365	295.06	288.217	266.22	336.988	299.702		0.123238	469
16GW005-78	0.93806	0.03212	0.10834	0.00153	0.06249	0.00211		672	17	663	9	691	49	0.0561949	89.059	0.246605	4.35928	8.79481	1.63639	53.1427	19.6351	269.651	106.767	576.618	125.963	1528.77	268.721	665.966	787.774			16GW005-78	0.237109	145.521	2.59585	9.33465	57.4824	28.2137	258.602	525.003	1061.62	1886.35	3484.1	4939.71	8992.76	10579.5		0.231407	663
16GW005-79	0.46067	0.06552	0.07256	0.00114	0.04605	0.00659		385	46	452	7		260	0	4.1226	0.147935	3.56386	9.28188	0.758968	48.5267	13.2576	122.907	32.3473	121.977	20.1193	201.296	27.0109	60.9206	866.183			16GW005-79	0	6.73627	1.55721	7.63139	60.6659	13.0857	236.14	354.48	483.886	571.506	737.021	788.993	1184.09	1063.42		0.10933	452
16GW005-80	1.04549	0.02197	0.11794	0.00116	0.06394	0.00143		727	11	719	7	740	28	0.0312436	5.14361	0.272423	3.89758	12.8645	0.510225	77.3462	27.1798	354.952	128.62	612.367	119.176	1300.48	207.219	334.528	1032.18			16GW005-80	0.131829	8.40459	2.86762	8.346	84.0816	8.79698	376.38	726.733	1397.45	2272.44	3700.1	4673.55	7649.89	8158.22		0.0494504	719
16GW022-01	0.3015	0.00818	0.04201	0.00043	0.05138	0.00148		268	6	265	3	258	43	384.726	1053.96	130.118	587.812	117.784	2.40518	151.231	32.7467	341.104	110.054	510.556	103.699	1123.51	181.057	1105.76	1706.74			16GW022-01	1623.32	1722.15	1369.66	1258.7	769.83	41.4686	735.919	875.58	1342.93	1944.42	3084.93	4066.63	6608.9	7128.22		0.0550943	265
16GW022-02	1.15017	0.03944	0.12598	0.00313	0.06445	0.00148		777	19	765	18	756	35	19.6454	69.4336	6.20173	25.7521	10.6997	0.626372	39.206	12.8584	184.993	67.5726	366.434	83.4321	1007.24	167.594	265.035	1440.93			16GW022-02	82.8918	113.454	65.2814	55.1436	69.9325	10.7995	190.783	343.807	728.321	1193.86	2214.1	3271.85	5924.92	6598.19		0.0934963	765
16GW022-03	0.24795	0.00738	0.03512	0.00038	0.05063	0.00157		225	6	222	2	224	49	4.93917	36.0589	1.87854	11.9546	10.7688	1.05521	52.4466	19.0405	291.023	119.524	636.329	141.398	1629.71	285.183	944.393	1777.34			16GW022-03	20.8404	58.9197	19.7741	25.5988	70.3844	18.1932	255.215	509.104	1145.76	2111.73	3844.89	5545.01	9586.51	11227.7		0.135743	222
16GW022-04	0.30139	0.0099	0.04188	0.00047	0.05157	0.00176		267	8	264	3	267	55	2.83916	95.7983	1.62191	13.9418	19.7885	6.9429	88.657	24.7619	297.927	104.412	522.473	108.654	1264.29	226.055	1250.56	1368.21			16GW022-04	11.9796	156.533	17.0727	29.8539	129.336	119.705	431.421	662.082	1172.94	1844.73	3156.94	4260.93	7437	8899.79		0.50676	264
16GW022-05	0.22965	0.01627	0.03384	0.00079	0.05147	0.00449		210	13	215	5	262	119	0	25.5685	0.0902868	0.96342	4.26778	0.775301	25.7004	9.06675	124.925	48.6978	257.001	54.6473	628.411	112.724	98.5573	252.148			16GW022-05	0	41.7786	0.950387	2.063	27.894	13.3673	125.063	242.426	491.832	860.386	1552.87	2143.03	3696.54	4437.94		0.22632	215
16GW022-06	0.23082	0.00871	0.03322	0.00041	0.04965	0.00187		211	7	211	3	179	65	25.8267	95.2868	8.77709	41.053	11.9513	0.732527	38.588	13.6522	195.42	82.3512	456.876	105.401	1274.72	227.772	441.333	1318.39			16GW022-06	108.973	155.697	92.3904	87.908	78.1134	12.6298	187.776	365.032	769.368	1454.97	2760.58	4133.37	7498.35	8967.4		0.104283	211
16GW022-07	0.25992	0.00965	0.02669	0.00046	0.06933	0.00227		235	8	170	3	909	48	12.0898	84.6401	12.5951	91.9642	75.3715	17.9434	170.277	40.5178	440.765	156.43	804.898	175.448	1944.47	293.387	382.864	3624.71			16GW022-07	51.0117	138.301	132.58	196.925	492.624	309.369	828.599	1083.36	1735.3	2763.78	4863.43	6880.3	11438.1	11550.7		0.484224	170
16GW022-08	0.23102	0.00605	0.03135	0.00035	0.05269	0.00135		211	5	199	2	315	39	7.06145	86.2626	6.36031	41.9522	36.5364	6.96955	103.8	31.6253	386.907	144.032	747.872	158.944	1825.96	308.449	1464.94	3080.99			16GW022-08	29.7952	140.952	66.9506	89.8334	238.8	120.165	505.109	845.595	1523.25	2544.74	4518.87	6233.1	10740.9	12143.7		0.345992	199
16GW022-09	0.29043	0.01149	0.0396	0.00059	0.0525	0.00254		259	9	250	4	307	63	1.10401	24.7785	1.38248	9.86963	12.6993	2.49756	53.4369	18.2761	263.718	106.716	595.389	131.335	1527.39	269.686	630.458	1984.04			16GW022-09	4.65826	40.4878	14.5524	21.1341	83.002	43.0613	260.034	488.666	1038.26	1885.44	3597.51	5150.41	8984.62	10617.5		0.293108	250
16GW022-10	0.29572	0.0076	0.04039	0.00042	0.05235	0.00133		263	6	255	3	301	39	19.3459	128.389	8.03075	49.3708	21.7536	3.96781	81.0674	23.6723	307.794	111.24	570.113	122.337	1382.53	241.047	2045.11	4452.16			16GW022-10	81.6284	209.786	84.5342	105.719	142.181	68.4105	394.489	632.948	1211.79	1965.37	3444.79	4797.54	8132.53	9490.03		0.288859	255
16GW022-11	0.35899	0.02619	0.03579	0.00057	0.06489	0.00332		311	20	227	4	771	127	221.047	700.283	96.939	539.871	184.669	8.05839	329.304	76.9626	821.731	273.135	1253.92	245.259	2492.86	389.559	2379.6	4505.45			16GW022-11	932.686	1144.25	1020.41	1156.04	1206.99	138.938	1602.45	2057.82	3235.16	4825.71	7576.53	9617.99	14663.9	15337		0.0999025	227
16GW022-12	1.13378	0.03549	0.12473	0.0023	0.06518	0.00177		770	17	758	13	780	36	1.56554	32.3746	1.93466	13.6978	16.1362	2.02769	76.2285	23.9946	337.278	127.588	669.35	143.868	1627.94	263.204	556.002	1916.5			16GW022-12	6.60564	52.8997	20.3648	29.3315	105.465	34.9603	370.942	641.566	1327.87	2254.2	4044.41	5641.87	9576.14	10362.4		0.176753	758
16GW022-13	0.63166	0.0228	0.07942	0.00137	0.05778	0.00223		497	14	493	8	521	49	0.541379	20.0509	0.836706	7.98192	13.314	0.439881	64.0768	18.6769	220.676	74.5865	353.444	71.5765	757.145	120.138	611.148	2147.53			16GW022-13	2.2843	32.763	8.80743	17.0919	87.0198	7.58415	311.809	499.382	868.802	1317.78	2135.61	2806.92	4453.8	4729.83		0.0460419	493
16GW022-14	0.2531	0.01142	0.03448	0.00066	0.05396	0.00247		229	9	219	4	369	67	1.09907	29.1316	1.23291	8.72358	11.0883	1.52423	48.7411	16.1552	211.444	81.0544	450.632	110.917	1396.51	228.271	653.019	1659.41			16GW022-14	4.63742	47.6006	12.9779	18.68	72.4728	26.2799	237.183	431.958	832.456	1432.06	2722.85	4349.7	8214.75	8987.05		0.200445	219
16GW022-15	0.20475	0.01476	0.02974	0.00059	0.0503	0.00379		189	12	189	4	209	127	2.04802	29.885	0.915281	7.45169	8.5987	1.09662	47.7484	17.8495	305.957	137.461	896.985	229.072	2903.71	530.279	395.295	1871.72			16GW022-15	8.64144	48.8317	9.63454	15.9565	56.2007	18.9072	232.352	477.26	1204.56	2428.64	5419.85	8983.22	17080.7	20877.1		0.165456	189
16GW022-16	0.20907	0.00692	0.02976	0.00037	0.05118	0.00176		193	6	189	2	249	53	29.4349	115.256	15.3498	100.25	99.4431	5.88936	388.372	115.822	1381.81	447.671	1969.09	369.886	3618.28	549.088	1457.94	2315.52			16GW022-16	124.198	188.327	161.577	214.668	649.955	101.541	1889.89	3096.85	5440.2	7909.38	11897.8	14505.3	21284	21617.7		0.091618	189
16GW022-17	0.22044	0.01389	0.03224	0.00083	0.0496	0.00299		202	12	205	5	176	97	0.0450577	44.4663	0.211185	4.56272	11.568	3.0146	71.926	23.0185	322.394	123.878	626.736	131.957	1467.05	248.553	284.784	537.275			16GW022-17	0.190117	72.6574	2.223	9.77028	75.6075	51.9759	350.005	615.468	1269.27	2188.67	3786.92	5174.8	8629.73	9785.56		0.319508	205
16GW022-18	1.07372	0.06426	0.1205	0.00244	0.06889	0.00599		741	31	733	14	895	90	26.9067	111.415	14.7074	86.8574	47.252	0.49193	127.423	36.3247	445.702	154.66	749.986	146.887	1504.41	249.787	767.336	2609.65			16GW022-18	113.53	182.051	154.815	185.99	308.836	8.48156	620.063	971.25	1754.73	2732.5	4531.64	5760.29	8849.48	9834.13		0.0193818	733
16GW022-19	0.61287	0.02811	0.07747	0.0012	0.05839	0.00279		485	18	481	7	544	73	0.0537414	24.2999	0.111315	2.26616	4.10903	1.50985	20.9488	7.20547	94.8366	38.4669	209.399	48.7799	619.063	120.256	255.76	400.927			16GW022-19	0.226757	39.7057	1.17173	4.85258	26.8564	26.0319	101.941	192.66	373.373	679.627	1265.25	1912.94	3641.55	4734.49		0.497517	481
16GW022-20	1.07162	0.03727	0.12271	0.00198	0.06265	0.00192		740	18	746	11	696	47	0.0675128	1.58975	0.108735	1.81828	7.13825	0.436283	56.6913	19.7891	189.263	46.5622	175.56	33.5768	331.214	47.0467	76.6553	1404.58			16GW022-20	0.284864	2.59763	1.14458	3.89353	46.6552	7.52212	275.87	529.121	745.129	822.654	1060.79	1316.74	1948.32	1852.23		0.0663037	746
16GW189-01	0.50987	0.01465	0.06713	0.00094	0.05508	0.00164		418	10	419	6	415	39	4.82	18.16	3.53	22.85	23.45	2.1	74.76	19.29	191.31	56.83	210.6	40.3	352.08	60.46	416.33	853.44			16GW189-01	20.3376	29.6732	37.1579	48.9293	153.268	36.2069	363.796	515.775	753.189	1004.06	1272.51	1580.39	2071.06	2380.31		0.153333	419
16GW189-02	0.28662	0.00527	0.03972	0.00046	0.05232	0.00099		256	4	251	3	299	22	1.103	8.74	0.928	5.85	6.4	0.83	28.24	10.63	130.88	52.24	248.82	54.92	544.39	104.31	247.85	797.25			16GW189-02	4.65401	14.281	9.76842	12.5268	41.8301	14.3103	137.421	284.225	515.276	922.968	1503.44	2153.73	3202.29	4106.69		0.188747	251
16GW189-03	0.2497	0.01713	0.0347	0.00086	0.05219	0.00375		226	14	220	5	294	111	2.72	5.76	1.81	7.72	6.63	0.83	9.45	3.18	30.19	9.04	28.84	4.91	47.12	10.07	20.23	429.8			16GW189-03	11.4768	9.41176	19.0526	16.531	43.3333	14.3103	45.9854	85.0267	118.858	159.717	174.26	192.549	277.176	396.457		0.320575	220
16GW189-04	0.24916	0.01784	0.03349	0.00084	0.05395	0.00404		226	15	212	5	369	116	<0.00	4.05	0.064	1.09	2.13	0.483	12.33	4.21	53.67	21.3	99.22	21.1	206.76	43.4	39.49	100.05			16GW189-04	#VALUE!	6.61765	0.673684	2.33405	13.9216	8.32759	60	112.567	211.299	376.325	599.517	827.451	1216.24	1708.66		0.288137	212
16GW189-05	0.2687	0.01014	0.02891	0.00049	0.0674	0.00268		242	8	184	3	850	50	18.49	152.94	25.74	148.89	113.12	38.74	217.6	60.43	532.53	142.44	544.43	104.48	965.68	156.26	807.69	1861.04			16GW189-05	78.0169	249.902	270.947	318.822	739.346	667.931	1058.88	1615.78	2096.57	2516.61	3289.61	4097.25	5680.47	6151.97		0.754891	184
16GW189-06	0.25443	0.0056	0.03448	0.00042	0.05351	0.00121		230	5	219	3	350	28	2.54	78.46	3.95	22.97	18.01	6.47	46.98	14.56	160.24	55.22	250.01	55.86	580.45	109.01	633.17	688.8			16GW189-06	10.7173	128.203	41.5789	49.1863	117.712	111.552	228.613	389.305	630.866	975.618	1510.63	2190.59	3414.41	4291.73		0.680009	219
16GW189-07	0.28421	0.007	0.04006	0.00051	0.05145	0.00131		254	6	253	3	261	34	0.172	13.93	0.49	8.47	16.02	2.7	71.77	24.51	287.21	105.52	442.27	89.37	816.17	145.27	249.08	358.1			16GW189-07	0.725738	22.7614	5.15789	18.137	104.706	46.5517	349.246	655.348	1130.75	1864.31	2672.33	3504.71	4801	5719.29		0.243436	253
16GW189-08	0.29419	0.01717	0.03932	0.00079	0.05426	0.00328		262	13	249	5	382	95	0.05	53.94	0.534	8.56	9.59	3.33	32.14	8.17	79.29	25.61	103.09	20.58	190.53	36.62	85.31	58.8			16GW189-08	0.21097	88.1373	5.62105	18.3298	62.6797	57.4138	156.399	218.449	312.165	452.473	622.9	807.059	1120.76	1441.73		0.579877	249
16GW189-09	0.29139	0.00705	0.04018	0.00051	0.0526	0.00131		260	6	254	3	312	32	0.037	3.01	0.221	3.21	4.89	0.402	26.33	9.45	106.94	38	155.87	30.61	283.84	51.77	56.29	441.36			16GW189-09	0.156118	4.9183	2.32632	6.87366	31.9608	6.93103	128.127	252.674	421.024	671.378	941.813	1200.39	1669.65	2038.19		0.10831	254
16GW189-10	0.39119	0.01789	0.05157	0.00096	0.05501	0.00263		335	13	324	6	413	69	11.84	32.92	8.04	53	33.88	5.07	60.21	18.99	144.42	36.28	141.68	29.43	292.66	56.32	300.92	927.59			16GW189-10	49.9578	53.7908	84.6316	113.49	221.438	87.4138	292.993	507.754	568.583	640.989	856.073	1154.12	1721.53	2217.32		0.343183	324
16GW189-11	0.39139	0.00827	0.05277	0.00064	0.05379	0.00117		335	6	332	4	362	27	28.9	247.95	8.85	48.09	43.65	9.69	182.67	60.24	577.56	176.85	674.77	131.2	1173.52	195.6	969.16	678.56			16GW189-11	121.941	405.147	93.1579	102.976	285.294	167.069	888.905	1610.7	2273.86	3124.56	4077.16	5145.1	6903.06	7700.79		0.331758	332
16GW189-12	0.29466	0.01948	0.03957	0.00094	0.05401	0.00373		262	15	250	6	371	106	0.036	46.88	0.233	4.13	5.36	2.04	21.81	6	60.05	19.19	75.76	15.69	147.98	26.63	143.52	156.62			16GW189-12	0.151899	76.6013	2.45263	8.84368	35.0327	35.1724	106.131	160.428	236.417	339.046	457.764	615.294	870.471	1048.43		0.576824	250
16GW189-13	0.3649	0.01165	0.02992	0.0005	0.08846	0.00302		315.9	8.67	190	3.14	1392.4	64.05	23.5	103.48	15.2	80.51	57.57	19.15	111.06	31.4	256.95	65.36	221.41	41.5	359.84	61.11	520.26	1026.37			16GW189-13	99.1561	169.085	160	172.398	376.275	330.172	540.438	839.572	1011.61	1154.77	1337.82	1627.45	2116.71	2405.91		0.732176	190
16GW189-14	0.35637	0.00987	0.04904	0.00067	0.0527	0.00151		310	7	309	4	316	38	0.329	1.17	0.274	1.48	2.87	0.207	21	10.12	125.85	42.53	173.83	35.08	328.7	55.72	43.37	927.93			16GW189-14	1.38819	1.91176	2.88421	3.16916	18.7582	3.56897	102.19	270.588	495.472	751.413	1050.33	1375.69	1933.53	2193.7		0.0815161	309
16GW189-15	0.31089	0.01384	0.03731	0.0007	0.06043	0.00283		275	11	236	4	619	64	1.5	0.7	0.75	3.74	2.24	0.39	5.3	2.13	29.26	12.05	53.32	11.12	104.2	18.99	9.06	657.59			16GW189-15	6.32911	1.14379	7.89474	8.00857	14.6405	6.72414	25.7908	56.9519	115.197	212.898	322.175	436.078	612.941	747.638		0.34604	236
16GW189-16	0.30028	0.01172	0.03872	0.00065	0.05624	0.0023		267	9	245	4	462	57	0.073	31.47	0.179	2.81	5.55	2.32	27.63	9.02	105.98	38.25	180.33	39.05	379.94	73.19	184.8	471.87			16GW189-16	0.308017	51.4216	1.88421	6.01713	36.2745	40	134.453	241.176	417.244	675.795	1089.61	1531.37	2234.94	2881.5		0.572763	245
16GW189-17	0.25242	0.01249	0.03474	0.00067	0.05269	0.00272		229	10	220	4	315	77	1.2	15.92	1.2	6.94	8.25	0.79	31.74	9.87	114.98	43.04	180.76	36.58	352.46	61.54	236.07	447.66			16GW189-17	5.06329	26.0131	12.6316	14.8608	53.9216	13.6207	154.453	263.904	452.677	760.424	1092.21	1434.51	2073.29	2422.83		0.149252	220
16GW189-18	0.30651	0.00625	0.03906	0.00048	0.05691	0.00119		271	5	247	3	488	24	3.36	21.69	4.49	23.5	18.46	2.99	31.3	10.12	76.92	17.04	65.36	14.71	157.98	28.65	89.37	470.59			16GW189-18	14.1772	35.4412	47.2632	50.3212	120.654	51.5517	152.311	270.588	302.835	301.06	394.924	576.863	929.294	1127.95		0.380283	247
16GW189-19	0.37045	0.00621	0.03234	0.00039	0.08309	0.00143		320	4.6	205.1	2.41	1271.4	33.19	2.04	28.29	1.236	10.33	11.5	0.448	63.07	23.11	276.01	102.94	448.08	90.25	814.11	142.67	313.92	695.57			16GW189-19	8.60759	46.2255	13.0105	22.1199	75.1634	7.72414	306.91	617.914	1086.65	1818.73	2707.43	3539.22	4788.88	5616.93		0.0508559	205.1
16GW189-20	0.27642	0.00858	0.02711	0.00042	0.07395	0.00242		248	7	172	3	1040	38	12.58	96.16	5.9	32.39	11.61	2.6	24.85	7.27	86.32	31.72	149.47	34.97	354.23	75.66	390.46	1017.92			16GW189-20	53.0802	157.124	62.1053	69.3576	75.8824	44.8276	120.925	194.385	339.843	560.424	903.142	1371.37	2083.71	2978.74		0.46797	172
16GW189-21	0.33347	0.01106	0.0453	0.00068	0.05339	0.00184		292	8	286	4	345	48	5.22	50.98	4.34	20.35	13.07	2.85	31.78	9.8	105.83	38.75	184.6	41.68	426.28	85.61	254.97	975.31			16GW189-21	22.0253	83.3007	45.6842	43.576	85.4248	49.1379	154.647	262.032	416.654	684.629	1115.41	1634.51	2507.53	3370.47		0.427517	286
16GW189-22	0.30955	0.00826	0.03001	0.00043	0.07483	0.0021		274	6	191	3	1064	31	8.77	6.03	6.45	34.58	17.43	2.33	25.82	7.81	75.51	22.14	87.15	18.14	175.89	31.18	45.43	859.28			16GW189-22	37.0042	9.85294	67.8947	74.0471	113.922	40.1724	125.645	208.824	297.283	391.166	526.586	711.373	1034.65	1227.56		0.335778	191
16GW180-1	0.68595	0.01164	0.08503	0.00101	0.05849	0.00099		530	7	526	6	548	18	3.02	33.12	2.31	12.54	4.23	0.45	8.88	2.64	34.06	12.6	69.83	17.74	223.63	44.98	173.43	414.71			16GW180-1	12.7426	54.1176	24.3158	26.8522	27.6471	7.75862	43.2117	70.5882	134.094	222.615	421.934	695.686	1315.47	1770.87		0.224471	526
16GW180-2	0.59029	0.01046	0.07413	0.00089	0.05773	0.00102		471	7	461	5	520	19	0.057	5.13	0.123	1.16	2.17	0.088	11.79	4.59	60.21	21.88	102.55	20.81	208.54	32.89	132.19	479.74			16GW180-2	0.240506	8.38235	1.29474	2.48394	14.183	1.51724	57.3723	122.727	237.047	386.572	619.637	816.078	1226.71	1294.88		0.0531887	461
16GW180-3	0.61491	0.01295	0.07749	0.00098	0.05753	0.00123		487	8	481	6	512	25	0.58	7.71	0.33	2.47	3.29	0.23	14.6	5.13	65.71	24.04	108.94	21.89	222.43	34.44	132.32	266.21			16GW180-3	2.44726	12.598	3.47368	5.28908	21.5033	3.96552	71.0462	137.166	258.701	424.735	658.248	858.431	1308.41	1355.91		0.101456	481
16GW180-4	0.44863	0.01155	0.05986	0.00081	0.05434	0.00143		376	8	375	5	385	34	1.56	23.58	0.92	6.85	4.9	0.82	22.21	8.03	106.49	40.36	191.69	41.66	457.01	77.4	135.66	389.95			16GW180-4	6.58228	38.5294	9.68421	14.6681	32.0261	14.1379	108.078	214.706	419.252	713.074	1158.25	1633.73	2688.29	3047.24		0.240306	375
16GW180-5	0.63929	0.01559	0.07855	0.00105	0.05902	0.00147		501.9	9.66	487.4	6.27	567.7	53.41	<0.0052	1.96	0.031	0.55	1.79	0.24	8.93	3	35.04	12.17	55.16	11.59	115.93	18.7	44.5	211			16GW180-5	#VALUE!	3.20261	0.326316	1.17773	11.6993	4.13793	43.455	80.2139	137.953	215.018	333.293	454.51	681.941	736.22		0.18352	487.4
16GW180-6	0.54834	0.02111	0.07144	0.0012	0.05565	0.00222		444	14	445	7	438	56	2.4	20.3	2.8	12.23	11.67	1.16	29.92	8.82	79.83	20.98	81.83	18.19	189.36	32.07	191.06	702.41			16GW180-6	10.1266	33.1699	29.4737	26.1884	76.2745	20	145.596	235.829	314.291	370.671	494.441	713.333	1113.88	1262.6		0.189787	445
16GW180-7	13.1953	0.17157	0.51767	0.00619	0.18483	0.00229		2694	12	2689	26	2697	10	0.146	27.26	0.185	1.88	2.56	0.63	12.72	4.65	61.02	22.7	108.48	22.86	249.88	45.2	38.01	111.18			16GW180-7	0.616034	44.5425	1.94737	4.0257	16.732	10.8621	61.8978	124.332	240.236	401.06	655.468	896.471	1469.88	1779.53		0.337521	2689
16GW180-8	0.25156	0.00858	0.03496	0.00052	0.05217	0.00184		228	7	222	3	293	51	0.0064	9.96	0.138	2.67	5.63	0.39	27.72	9.22	113.37	39.67	172.31	33.38	327.9	53.62	106.64	188.82			16GW180-8	0.0270042	16.2745	1.45263	5.71734	36.7974	6.72414	134.891	246.524	446.339	700.883	1041.15	1309.02	1928.82	2111.02		0.0954415	222
16GW180-9	2.34993	0.0367	0.20749	0.00249	0.08212	0.00127		1228	11	1215	13	1248	14	0.0062	1.27	0.025	0.66	2.2	0.062	15.37	6.15	84.1	32.43	152.09	31.92	330.75	54.64	64.92	274.54			16GW180-9	0.0261603	2.07516	0.263158	1.41328	14.3791	1.06897	74.7932	164.439	331.102	572.968	918.973	1251.76	1945.59	2151.18		0.0325962	1215
16GW180-10	0.3015	0.00541	0.03944	0.00047	0.05544	0.001		268	4	249	3	430	20	2.08	21.46	3.08	15.02	15.3	2	34.01	12.99	137.49	41.95	178.29	36.4	363.41	59.52	264.34	1142.45			16GW180-10	8.77637	35.0654	32.4211	32.1627	100	34.4828	165.499	347.326	541.299	741.166	1077.28	1427.45	2137.71	2343.31		0.268043	249
16GW180-11	0.59385	0.01081	0.07448	0.0009	0.05782	0.00106		473	7	463	5	523	20	0.76	9.5	1.03	5.03	3.28	0.183	9.64	3.16	40.33	15.68	75.67	16.69	175.24	30.92	72.73	727.83			16GW180-11	3.20675	15.5229	10.8421	10.7709	21.4379	3.15517	46.91	84.492	158.78	277.032	457.221	654.51	1030.82	1217.32		0.0994945	463
16GW180-12	0.28177	0.01161	0.04095	0.00065	0.0499	0.00212		252	9	259	4	190	66	0.0091	4.67	0.034	0.57	1.53	0.2	7.61	2.77	35.46	12.65	60.1	12.88	128.06	21.27	43.09	112.07			16GW180-12	0.0383966	7.63072	0.357895	1.22056	10	3.44828	37.0316	74.0642	139.606	223.498	363.142	505.098	753.294	837.402		0.179191	259
16GW180-13	0.31646	0.00701	0.04376	0.00055	0.05244	0.00118		279	5	276	3	305	28	0.017	19.2	0.081	1.38	3.62	0.073	19.84	7.68	102.82	38.76	179.85	38.71	389.16	64.74	204.87	312.81			16GW180-13	0.07173	31.3725	0.852632	2.95503	23.6601	1.25862	96.545	205.348	404.803	684.806	1086.71	1518.04	2289.18	2548.82		0.0263343	276
16GW180-14	0.67116	0.0091	0.08433	0.00095	0.05771	0.00076		521	6	522	6	519	13	<0.0114	7.95	0.063	1.2	2.99	0.39	12.68	4.27	51.69	18.09	81.63	17.32	177.62	30.22	210.34	845.36			16GW180-14	#VALUE!	12.9902	0.663158	2.56959	19.5425	6.72414	61.7032	114.171	203.504	319.611	493.233	679.216	1044.82	1189.76		0.193639	522
[truncated: 446 more rows]
[truncated: 2 more columns]
