# Supplementary material
Source: MDPI journal article supplement (https://www.mdpi.com/2075-163X/13/9/1121)
Supplement: s1 [file s1 › Supplementary File 2. Data for Figure 7d and 7e.xlsx]

## Sheet: Sheet1
Sample	Geochemical sample number	Latitude	Longitude	Type	Lithology	Age	2sigma	Sr	Y	La	Yb	Sr/Y	La/Ybn	Reference
HYC10-1		47.7102	128.39	Intrusive	gabbro	182	2	558	17.8	8.8	1.47		4.29404	Yu et al., 2012, Lithos
HYC10-2		47.7102	128.39	Intrusive	gabbro	182	2	553	18.3	9.29	1.5		4.44248	Yu et al., 2012, Lithos
HYL1-1		46.3483	128.019	Intrusive	hornblendite	186	2	212	22.1	1.73	1.82		0.681829	Yu et al., 2012, Lithos
HYL1-4		46.3483	128.019	Intrusive	hornblendite	186	2	196	21	1.83	1.72		0.763173	Yu et al., 2012, Lithos
HYL1-6		46.3483	128.019	Intrusive	hornblendite	186	2	226	19.7	2.89	1.66		1.24879	Yu et al., 2012, Lithos
HWC1-1		45.1414	127.234	Intrusive	diorite	183	1	547	27.6	26.8	2.39		8.04336	Yu et al., 2012, Lithos
HWC1-2		45.1414	127.234	Intrusive	diorite	183	1	532	28.2	26.4	2.48		7.63577	Yu et al., 2012, Lithos
HWC1-3		45.1414	127.234	Intrusive	diorite	183	1	677	29.9	27.6	2.43		8.14711	Yu et al., 2012, Lithos
H15-08	H15-08-3	46.9167	128.183	Intrusive	Diorite	181	1	521	45.2	35.62	4.26	11.5265	5.9977	Ge et al., 2018, Lithos
H15-08	H15-08-4	46.9167	128.183	Intrusive	Diorite	181	1	539	43.2	27.36	4.68	12.4769	4.19344	Ge et al., 2018, Lithos
H15-08	H15-08-5	46.9167	128.183	Intrusive	Diorite	181	1	477	71.8	16.56	7.12	6.64345	1.66833	Ge et al., 2018, Lithos
H15-11	H15-11-2	46.9172	128.334	Intrusive	Granodiorite	178	2	506	13.4	39.7	1.24	37.7612	22.9652	Ge et al., 2018, Lithos
H15-11	H15-11-3	46.9172	128.334	Intrusive	Granodiorite	178	2	512	13.7	39.85	1.22	37.3723	23.4298	Ge et al., 2018, Lithos
H15-11	H15-11-4	46.9172	128.334	Intrusive	Granodiorite	178	2	526	14.3	40.09	1.24	36.7832	23.1908	Ge et al., 2018, Lithos
H15-14	H15-14-3	46.9514	128.7	Intrusive	Monzogranite	191	1	142	35.9	61.95	3.51	3.95543	12.66	Ge et al., 2018, Lithos
H15-14	H15-14-4	46.9514	128.7	Intrusive	Monzogranite	191	1	112	19.1	34.59	2.32	5.86387	10.6946	Ge et al., 2018, Lithos
H15-14	H15-14-5	46.9514	128.7	Intrusive	Monzogranite	191	1	134	18.4	35.35	2.16	7.28261	11.7391	Ge et al., 2018, Lithos
H15-16	H15-16-2	47.0344	129.1	Intrusive	Monzogranite	195	2	70.6	32.7	33.73	3.42	2.15902	7.07442	Ge et al., 2018, Lithos
H15-16	H15-16-3	47.0344	129.1	Intrusive	Monzogranite	195	2	60.9	20.9	20.5	2.56	2.91388	5.744	Ge et al., 2018, Lithos
H15-16	H15-16-4	47.0344	129.1	Intrusive	Monzogranite	195	2	58.4	27.1	33.28	3.19	2.15498	7.4833	Ge et al., 2018, Lithos
H15-39	H15-39-2	47.3833	129.968	Intrusive	Diorite	246	1	867	15.6	56.49	1.38		29.3625	Ge et al., 2018, Lithos
H15-39	H15-39-3	47.3833	129.968	Intrusive	Diorite	246	1	849	19.3	33.01	1.53		15.4759	Ge et al., 2018, Lithos
H15-39	H15-39-4	47.3833	129.968	Intrusive	Diorite	246	1	838	16.5	25.92	1.4		13.2803	Ge et al., 2018, Lithos
H15-40	H15-40-2	47.3833	129.968	Intrusive	Monzogranite	241	1	410	15.4	21.29	1.63	26.6234	9.3689	Ge et al., 2018, Lithos
H15-40	H15-40-3	47.3833	129.968	Intrusive	Monzogranite	241	1	374	15.5	14.2	1.7	24.129	5.99156	Ge et al., 2018, Lithos
H15-40	H15-40-4	47.3833	129.968	Intrusive	Monzogranite	241	1	397	14	19.36	1.52	28.3571	9.13613	Ge et al., 2018, Lithos
DHS	DHS-1	43.0664	126.291	Eruptive	Andesite	177	3	589	34.9	24.9	3.51		5.08854	Han et al., 2019, IGR
DHS	DHS-2	43.0664	126.291	Eruptive	Andesite	177	3	457.3	32.55	20.97	3.41		4.41108	Han et al., 2019, IGR
DHS	DHS-3	43.0664	126.291	Eruptive	Andesite	177	3	523.7	33.9	20.11	3.41		4.23017	Han et al., 2019, IGR
LK37	LK37-1	42.791	125.947	Intrusive	gabbro	258	1	558	4.77	0.91	0.32		2.03982	Cao et al., 2013, Lithos
LK37	LK37-2	42.791	125.947	Intrusive	gabbro	258	1	523	5.14	0.87	0.4		1.56013	Cao et al., 2013, Lithos
LK37	LK37-3	42.791	125.947	Intrusive	gabbro	258	1	486	5.91	0.9	0.35		1.84448	Cao et al., 2013, Lithos
LK37	LK37-5	42.791	125.947	Intrusive	gabbro	258	1	506	4.81	0.88	0.36		1.7534	Cao et al., 2013, Lithos
LK36	LK36-1	42.8625	125.762	Intrusive	syenogranite	259	2	298	19.2	32.8	0.56	15.5208	42.0133	Cao et al., 2013, Lithos
LK36	LK36-2	42.8625	125.762	Intrusive	syenogranite	259	2	320	10.3	34.4	0.64	31.068	38.5549	Cao et al., 2013, Lithos
11LK03	11LK03-1	42.8625	125.762	Intrusive	syenogranite	259	2	326	8.68	25.7	0.58	37.5576	31.7838	Cao et al., 2013, Lithos
11LK03	11LK03-4	42.8625	125.762	Intrusive	syenogranite	259	2	311	7.98	27.6	0.56	38.9724	35.3526	Cao et al., 2013, Lithos
H15-10	H15-10-2	46.9181	128.185	Intrusive	Syenogranite	190	2	29.9	31.4	27.3	2.95	0.952229	6.63806	Ge et al., 2019, Lithosphere
H15-10	H15-10-3	46.9181	128.185	Intrusive	Syenogranite	190	2	34.2	25.6	21.7	2.38	1.33594	6.54008	Ge et al., 2019, Lithosphere
H15-10	H15-10-4	46.9181	128.185	Intrusive	Syenogranite	190	2	39.4	31.1	31.4	2.93	1.26688	7.6871	Ge et al., 2019, Lithosphere
H15-55	H15-55-3	46.2017	128.653	Intrusive	Syenogranite	196	1	65.7	13.2	23.3	2.15	4.97727	7.77353	Ge et al., 2019, Lithosphere
H15-55	H15-55-4	46.2017	128.653	Intrusive	Syenogranite	196	1	75	15.6	28.3	2.36	4.80769	8.60152	Ge et al., 2019, Lithosphere
H15-55	H15-55-5	46.2017	128.653	Intrusive	Syenogranite	196	1					#DIV/0!	#DIV/0!	Ge et al., 2019, Lithosphere
H15-56	H15-56-2	46.2672	128.536	Intrusive	Syenogranite	196	1	104	30.1	35.5	3.7	3.45515	6.8822	Ge et al., 2019, Lithosphere
H15-56	H15-56-3	46.2672	128.536	Intrusive	Syenogranite	196	1	42.7	16.7	16	1.92	2.55689	5.9775	Ge et al., 2019, Lithosphere
H15-57	H15-57-2	46.4231	128.526	Intrusive	Tonalite (MME)	186	1	481	18.3	31.1	1.93	26.2842	11.5586	Ge et al., 2019, Lithosphere
H15-57	H15-57-3	46.4231	128.526	Intrusive	Tonalite (MME)	186	1	526	17.2	30.5	1.82	30.5814	12.0207	Ge et al., 2019, Lithosphere
H15-57	H15-57-4	46.4231	128.526	Intrusive	Tonalite (MME)	186	1					#DIV/0!	#DIV/0!	Ge et al., 2019, Lithosphere
H15-58	H15-58-3	46.4417	128.537	Intrusive	Granodiorite (MME)	181	1	386	14.1	30	1.68	27.3759	12.8089	Ge et al., 2019, Lithosphere
H15-58	H15-58-4	46.4417	128.537	Intrusive	Granodiorite (MME)	181	1	384	21.7	41.8	2.48	17.6959	12.09	Ge et al., 2019, Lithosphere
H15-59	H15-59-2	46.5617	128.677	Intrusive	Monzogranite	182	1	263	7.47	26.6	0.83	35.2075	22.9882	Ge et al., 2019, Lithosphere
H15-59	H15-59-3	46.5617	128.677	Intrusive	Monzogranite	182	1	276	9.22	28.2	0.95	29.9349	21.2925	Ge et al., 2019, Lithosphere
H15-59	H15-59-4	46.5617	128.677	Intrusive	Monzogranite	182	1					#DIV/0!	#DIV/0!	Ge et al., 2019, Lithosphere
CSC-1	D32	45.37	127.25	Intrusive	granite	176	1	423.2	17.38	28.1	2.05	24.3498	9.83225	Han et al., 2019, JGE
CSC-1	SJ-10a	45.37	127.25	Intrusive	granite	176	1	86	19.55	37.42	3.2	4.39898	8.38792	Han et al., 2019, JGE
CSC-1	WDL-1b	45.37	127.25	Intrusive	granite	176	1	41.7	23.59	37.79	3.74	1.7677	7.24779	Han et al., 2019, JGE
CSC-1	CSC-1c	45.37	127.25	Intrusive	granite	176	1	35.6	18.79	33.51	2.25	1.89462	10.683	Han et al., 2019, JGE
BL-1	BL-1c	45.37	127.25	Intrusive	granite	178	2	191.2	20.97	27.65	2.51	9.11779	7.90173	Han et al., 2019, JGE
BL-1	BL-2c	45.37	127.25	Intrusive	granite	178	2	288.1	18.37	27.53	2.25	15.6832	8.77656	Han et al., 2019, JGE
BL-1	BL-6c	45.37	127.25	Intrusive	granite	178	2	213.4	15.31	34.33	1.84	13.9386	13.3831	Han et al., 2019, JGE
BL-1	BL-7c	45.37	127.25	Intrusive	granite	178	2	139.7	19.98	29.81	2.47	6.99199	8.65696	Han et al., 2019, JGE
BL-1	BL-8c	45.37	127.25	Intrusive	granite	178	2	142	13	40.7	1.33	10.9231	21.9504	Han et al., 2019, JGE
YZM-1	YZM-1	45.3565	127.22	Intrusive	granite	196	2	33.8	11.58	14.42	2.74	2.91883	3.77499	Han et al., 2019, JGE
YZM-1	YZM-1a	45.3565	127.22	Intrusive	granite	196	2	34	10.98	15.28	2.68	3.09654	4.08968	Han et al., 2019, JGE
YZM-1	D18	45.3565	127.22	Intrusive	granite	196	2	34	14.26	20.2	2.33	2.38429	6.21865	Han et al., 2019, JGE
YZM-2	YZM-2	45.3182	127.261	Intrusive	granite	201	3	44.6	18.35	10.42	3.28	2.43052	2.27874	Han et al., 2019, JGE
YZM-2	YZM-2a	45.3182	127.261	Intrusive	granite	201	3	44.1	15.48	14.25	2.71	2.84884	3.77178	Han et al., 2019, JGE
YZM-2	D27	45.3182	127.261	Intrusive	granite	201	3	69.1	9.58	13.1	1.69	7.21294	5.56013	Han et al., 2019, JGE
YZM-3	YZM-3	45.3179	127.261	Intrusive	granite	205	4	39.6	16.61	11.15	3.2	2.38411	2.49934	Han et al., 2019, JGE
YZM-3	YZM-3a	45.3179	127.261	Intrusive	granite	205	4	33.9	13.88	20.02	2.48	2.44236	5.79046	Han et al., 2019, JGE
YZM-3	D38	45.3179	127.261	Intrusive	granite	205	4	45.1	13.83	24.7	1.62	3.26103	10.9366	Han et al., 2019, JGE
YZM-3	WDL-22b	45.3179	127.261	Intrusive	granite	205	4	62.9	20.31	23.49	3.16	3.097	5.33208	Han et al., 2019, JGE
15GW073	15GW070	46.4356	130.507	Intrusive	Granodiorite	278	2	756	22.1	57.8	1.91	34.2081	21.7068	Dong et al., 2017, GR
15GW073	15GW071	46.4356	130.507	Intrusive	Granodiorite	278	2	830	22.7	67.8	2.17	36.5639	22.4115	Dong et al., 2017, GR
15GW073	15GW072	46.4356	130.507	Intrusive	Granodiorite	278	2	744	22.1	54.4	2.12	33.6652	18.4062	Dong et al., 2017, GR
15GW073	15GW073	46.4356	130.507	Intrusive	Granodiorite	278	2	773	21.5	67.8	2.16	35.9535	22.5152	Dong et al., 2017, GR
15GW075	15GW075	46.3956	130.652	Intrusive	Monzogranite	272	2	761	6.85	52.5	0.665	111.095	56.6289	Dong et al., 2017, GR
15GW075	15GW076	46.3956	130.652	Intrusive	Monzogranite	272	2	423	17.2	44.5	1.9	24.593	16.7999	Dong et al., 2017, GR
15GW075	15GW077	46.3956	130.652	Intrusive	Monzogranite	272	2	452	11.8	47.5	1.35	38.3051	25.2383	Dong et al., 2017, GR
15GW075	15GW078	46.3956	130.652	Intrusive	Monzogranite	272	2	276	12.5	34.2	1.1	22.08	22.3015	Dong et al., 2017, GR
15GW235	15GW235	46.2389	130.766	Intrusive	Syenogranite	276	3	51.8	30.1	22.6	4.36	1.72093	3.71811	Dong et al., 2017, GR
15GW235	15GW236	46.2389	130.766	Intrusive	Syenogranite	276	3	58	30.2	23.4	3.62	1.92053	4.63669	Dong et al., 2017, GR
15GW235	15GW237	46.2389	130.766	Intrusive	Syenogranite	276	3	52.7	23.1	28.4	2.86	2.28139	7.12283	Dong et al., 2017, GR
15GW235	15GW238	46.2389	130.766	Intrusive	Syenogranite	276	3	60.2	38.9	21	5.95	1.54756	2.53165	Dong et al., 2017, GR
15GW235	15GW239	46.2389	130.766	Intrusive	Syenogranite	276	3	70.9	12.8	22.8	1.47	5.53906	11.1255	Dong et al., 2017, GR
15GW248	15GW248	46.6328	130.628	Intrusive	Monzogranite	267	3	398	10.3	47.7	0.833	38.6408	41.0747	Dong et al., 2017, GR
15GW248	15GW249	46.6328	130.628	Intrusive	Monzogranite	267	3	503	11.2	56.2	1.01	44.9107	39.9131	Dong et al., 2017, GR
15GW248	15GW250	46.6328	130.628	Intrusive	Monzogranite	267	3	360	12	53.3	1.05	30	36.4115	Dong et al., 2017, GR
15GW248	15GW251	46.6328	130.628	Intrusive	Monzogranite	267	3	499	10.2	52	0.817	48.9216	45.6543	Dong et al., 2017, GR
15GW248	15GW252	46.6328	130.628	Intrusive	Monzogranite	267	3	524	12.2	52.9	1.1	42.9508	34.4956	Dong et al., 2017, GR
15GW248	15GW253	46.6328	130.628	Intrusive	Monzogranite	267	3	547	14.7	54.6	1.11	37.2109	35.2834	Dong et al., 2017, GR
15GW261	15GW261	46.5325	130.646	Intrusive	Monzogranite	263	3	376	16.2	68.1	1.27	23.2099	38.4631	Dong et al., 2017, GR
15GW261	15GW262	46.5325	130.646	Intrusive	Monzogranite	263	3	401	16.1	69.6	1.5	24.9068	33.2827	Dong et al., 2017, GR
15GW261	15GW263	46.5325	130.646	Intrusive	Monzogranite	263	3	225	19.7	36.5	1.67	11.4213	15.6775	Dong et al., 2017, GR
15GW261	15GW264	46.5325	130.646	Intrusive	Monzogranite	263	3	411	16.9	69.8	1.46	24.3195	34.2928	Dong et al., 2017, GR
15GW265	15GW265	46.5128	130.642	Intrusive	Monzogranite	266	2	289	12.3	48.4	0.988	23.4959	35.139	Dong et al., 2017, GR
15GW265	15GW266	46.5128	130.642	Intrusive	Monzogranite	266	2	459	17.7	55.5	1.69	25.9322	23.5563	Dong et al., 2017, GR
15GW265	15GW267	46.5128	130.642	Intrusive	Monzogranite	266	2	320	13.8	68.9	1.02	23.1884	48.4529	Dong et al., 2017, GR
15GW265	15GW268	46.5128	130.642	Intrusive	Monzogranite	266	2	362	16	63.3	1.36	22.625	33.3861	Dong et al., 2017, GR
HJD13	HJD13-1	45.0639	131.498	Intrusive	gabbro	202	1	636	8.69	2.1	0.47		3.20496	Wang et al., 2015, JAES
HJD13	HJD13-2	45.0639	131.498	Intrusive	gabbro	202	1	712	5.02	3.5	0.35		7.173	Wang et al., 2015, JAES
HJD13	HJD13-3	45.0639	131.498	Intrusive	gabbro	202	1	696	5.38	3.24	0.37		6.28122	Wang et al., 2015, JAES
HJD13	HJD13-4	45.0639	131.498	Intrusive	gabbro	202	1	604	12.2	5.48	0.79		4.9757	Wang et al., 2015, JAES
HJD13	HJD13-5	45.0639	131.498	Intrusive	gabbro	202	1	611	9.43	3.65	0.76		3.44493	Wang et al., 2015, JAES
HJD13	HJD13-6	45.0639	131.498	Intrusive	gabbro	202	1	634	10.1	6.1	0.85		5.14768	Wang et al., 2015, JAES
13HJD1	13HJD1-1	45.1322	131.4	Intrusive	syenogranite	203	1	86.9	33.4	25.6	3.64	2.6018	5.04474	Wang et al., 2015, JAES
13HJD1	13HJD1-2	45.1322	131.4	Intrusive	syenogranite	203	1	87	32.7	24.9	3.65	2.66055	4.89336	Wang et al., 2015, JAES
13HJD1	13HJD1-3	45.1322	131.4	Intrusive	syenogranite	203	1	88.9	32.1	27.6	3.46	2.76947	5.72181	Wang et al., 2015, JAES
13HJD1	13HJD1-4	45.1322	131.4	Intrusive	syenogranite	203	1	76.2	38.8	33.6	4.43	1.96392	5.44047	Wang et al., 2015, JAES
13HJD1	13HJD1-5	45.1322	131.4	Intrusive	syenogranite	203	1	74.5	36.7	27.3	4.18	2.02997	4.68476	Wang et al., 2015, JAES
HB38-1	HB38-1	45.425	127.889	Eruptive	Andesite	173	3						#DIV/0!	Xu et al., 2013, JAES
HB13-1	HB13-1	45.5686	127.138	Eruptive	Basalt	174	2						#DIV/0!	Xu et al., 2013, JAES
HB13-1	HB13-3	45.5686	127.138	Eruptive	Basalt	174	2						#DIV/0!	Xu et al., 2013, JAES
HB28-1	HB28-1	45.5389	127.793	Eruptive	Dacite	190	1					#DIV/0!	#DIV/0!	Xu et al., 2013, JAES
HB28-1	HB28-2	45.5389	127.793	Eruptive	Dacite	190	1					#DIV/0!	#DIV/0!	Xu et al., 2013, JAES
HB10-1	HB10-6	45.7069	127.326	Eruptive	Rhyolite	175	1					#DIV/0!	#DIV/0!	Xu et al., 2013, JAES
HYC13-1	HYC13-2	47.5631	128.401	Eruptive	Rhyolite	185	1					#DIV/0!	#DIV/0!	Xu et al., 2013, JAES
HB10-1	HB10-4	45.7069	127.326	Eruptive	Rhyolite	175	1					#DIV/0!	#DIV/0!	Xu et al., 2013, JAES
HB4-1	HB4-1	45.5861	127.696	Eruptive	Rhyolite	190	1					#DIV/0!	#DIV/0!	Xu et al., 2013, JAES
HB4-1	HB4-2	45.5861	127.696	Eruptive	Rhyolite	190	1					#DIV/0!	#DIV/0!	Xu et al., 2013, JAES
HYL2-1	HYL2-1	46.1986	127.658	Eruptive	Andesite	179	2					#DIV/0!	#DIV/0!	Xu et al., 2013, JAES
HYL2-1	HYL2-2	46.1986	127.658	Eruptive	Andesite	179	2					#DIV/0!	#DIV/0!	Xu et al., 2013, JAES
HYL2-1	HYL2-6	46.1986	127.658	Eruptive	Andesite	179	2					#DIV/0!	#DIV/0!	Xu et al., 2013, JAES
HYL3-1	HYL3-1	46.1986	127.658	Eruptive	Rhyolite	184	2					#DIV/0!	#DIV/0!	Xu et al., 2013, JAES
HYL3-1	HYL3-2	46.1986	127.658	Eruptive	Rhyolite	184	2					#DIV/0!	#DIV/0!	Xu et al., 2013, JAES
14GW353	14GW350	48.2333	130.725	Intrusive	amphibolite	267	2	388	11.4	13.1	1.28		7.34111	Dong et al., 2017, IGR
14GW353	14GW351	48.2333	130.725	Intrusive	amphibolite	267	2	417	12.7	12	1.47		5.85551	Dong et al., 2017, IGR
14GW353	14GW352	48.2333	130.725	Intrusive	amphibolite	267	2	364	13.8	12.6	1.6		5.64873	Dong et al., 2017, IGR
14GW353	14GW353	48.2333	130.725	Intrusive	amphibolite	267	2	402	12.5	10.7	1.35		5.68526	Dong et al., 2017, IGR
14GW353	14GW354	48.2333	130.725	Intrusive	amphibolite	267	2	400	15.5	15	1.77		6.07881	Dong et al., 2017, IGR
14GW353	14GW355	48.2333	130.725	Intrusive	amphibolite	267	2	281	10.1	9.73	1.12		6.23154	Dong et al., 2017, IGR
14GW353	14GW356	48.2333	130.725	Intrusive	amphibolite	267	2	353	12.6	9.54	1.32		5.18412	Dong et al., 2017, IGR
14GW357	14GW357	48.2408	130.73	Intrusive	gabbro	264	2	341	30.4	28.8	3.44		6.0053	Dong et al., 2017, IGR
14GW357	14GW358	48.2408	130.73	Intrusive	gabbro	264	2	330	29	26.9	2.99		6.4533	Dong et al., 2017, IGR
14GW357	14GW359	48.2408	130.73	Intrusive	gabbro	264	2	327	29.2	26	3.17		5.88321	Dong et al., 2017, IGR
14GW357	14GW360	48.2408	130.73	Intrusive	gabbro	264	2	350	28.5	26.8	3.12		6.16142	Dong et al., 2017, IGR
LM-0101	LM-0101	47.1941	128.759	Intrusive	monzogranite	181	2	231	26	38.1	2.77	8.88462	9.86611	Hu et al., 2014, JAES
LM-0101	LM-0181	47.1941	128.759	Intrusive	monzogranite	181	2	251	21.6	46.2	2.03	11.6204	16.3247	Hu et al., 2014, JAES
LM-0101	LM-0182	47.1941	128.759	Intrusive	monzogranite	181	2	250	21	47.4	2.08	11.9048	16.3462	Hu et al., 2014, JAES
LM-0101	LM-0201	47.1941	128.759	Intrusive	monzogranite	181	2	222	21.8	46.5	2.45	10.1835	13.6141	Hu et al., 2014, JAES
LM-0101	LM-0202	47.1941	128.759	Intrusive	monzogranite	181	2	212	21.5	42.9	2.27	9.86047	13.556	Hu et al., 2014, JAES
XLJG-011	XLJ-011	47.17	127.431	Intrusive	monzogranite	181	1	250	26.9	33	2.91	9.29368	8.13433	Hu et al., 2014, JAES
XLJG-011	XLJ-021	47.17	127.431	Intrusive	monzogranite	181	1	567	7.78	21.6	0.73	72.8792	21.2242	Hu et al., 2014, JAES
XLJG-011	XLJ-022	47.17	127.431	Intrusive	monzogranite	181	1	560	9.1	28.9	0.91	61.5385	22.7802	Hu et al., 2014, JAES
XLJG-061	XLJ-061	47.17	127.431	Intrusive	monzogranite	180	1	434	8.89	22.5	0.89	48.8189	18.134	Hu et al., 2014, JAES
XLJG-061	XLJ-062	47.17	127.431	Intrusive	monzogranite	180	1	438	8.35	20.3	0.86	52.4551	16.9316	Hu et al., 2014, JAES
15YL10-1	15YL10-1	45.6833	127.483	Intrusive	granodiorite	186	1	421.9	13.41	24.3	1.48	31.4616	11.7773	Zhu et al., 2017, Lithosphere
15YL36-5	15YL36-2	43.8833	126.917	Intrusive	Monzogranite	191	1	256	20.54	33.08	2.04	12.4635	11.6315	Zhu et al., 2017, Lithosphere
15YL18-4	15YL18-2	46.9167	128.183	Intrusive	quartz diorite	183	1	564.11	13.87	51.16	1.16	40.6712	31.6354	Zhu et al., 2017, Lithosphere
15YL14-1	15YL14-4	47.6	128.5	Intrusive	granite	183	1	218.26	23.14	43.82	2.68	9.43215	11.7284	Zhu et al., 2017, Lithosphere
15YL36-5	15YL36-5	43.8833	126.917	Intrusive	Monzogranite	191	1	100.97	24.84	51.25	2.62	4.06481	14.0311	Zhu et al., 2017, Lithosphere
15YL40-1	15YL40-2	43.8167	126.717	Intrusive	Monzogranite	191	1	217.93	17.72	27.12	1.81	12.2985	10.7476	Zhu et al., 2017, Lithosphere
15YL40-1	15YL41-5	43.8167	126.717	Intrusive	Monzogranite	191	1	336.79	22.63	28.92	2.11	14.8825	9.83142	Zhu et al., 2017, Lithosphere
15YL10-1	15YL10-5	45.6833	127.483	Intrusive	granodiorite	186	1	435.3	12.32	25.37	1.4	35.3328	12.9985	Zhu et al., 2017, Lithosphere
15YL10-1	15YL10-6	45.6833	127.483	Intrusive	granodiorite	186	1	377.07	13.43	23.41	1.48	28.0767	11.3459	Zhu et al., 2017, Lithosphere
15YL14-1	15YL14-2	47.6	128.5	Intrusive	granite	183	1	335.33	25.57	38.19	2.53	13.1142	10.8275	Zhu et al., 2017, Lithosphere
15YL36-5	15YL36-4	43.8833	126.917	Intrusive	Monzogranite	191	1	135.04	21.17	35.35	2.1	6.37884	12.0745	Zhu et al., 2017, Lithosphere
15YL38-1	15YL38-2	44.35	127.017	Intrusive	granodiorite	163	1	409.51	16.4	27.83	1.47	24.9701	13.5799	Zhu et al., 2017, Lithosphere
15YL38-1	15YL38-3	44.35	127.017	Intrusive	granodiorite	163	1	330.78	20.31	32.92	1.97	16.2866	11.9865	Zhu et al., 2017, Lithosphere
15YL40-1	15YL40-4	43.8167	126.717	Intrusive	Monzogranite	191	1	502.55	13.72	58.13	1.42	36.629	29.3638	Zhu et al., 2017, Lithosphere
DH296	DH-296	43.4917	126.302	Intrusive	granodiorite	178	2	159	9.92	12.8	1.26	16.0282	7.28685	Zhou et al., 2014, IGR
DH296	DH-297	43.4917	126.302	Intrusive	granodiorite	178	2	161	8.76	12.1	1.11	18.379	7.81921	Zhou et al., 2014, IGR
DH296	DH-298	43.4917	126.302	Intrusive	granodiorite	178	2	148	7.07	9.86	0.945	20.9335	7.48421	Zhou et al., 2014, IGR
DH54	DH-96	43.4817	126.322	Intrusive	granodiorite	170	3	534	9.42	26.5	0.723	56.6879	26.2911	Zhou et al., 2014, IGR
DH54	DH-97	43.4817	126.322	Intrusive	granodiorite	170	3	533	8.86	29.5	0.731	60.158	28.9471	Zhou et al., 2014, IGR
DH54	DH-292	43.4817	126.322	Intrusive	granodiorite	170	3	502	8.25	26.3	0.723	60.8485	26.0926	Zhou et al., 2014, IGR
DH54	DH-293	43.4817	126.322	Intrusive	granodiorite	170	3	511	8.77	26.4	0.699	58.2668	27.0911	Zhou et al., 2014, IGR
DH54	DH-294	43.4817	126.322	Intrusive	granodiorite	170	3	507	9.36	30.2	0.677	54.1667	31.9977	Zhou et al., 2014, IGR
DH196	DH-192	43.4833	126.318	Intrusive	granodiorite	168	4	446	8.41	26.8	0.731	53.0321	26.2977	Zhou et al., 2014, IGR
DH196	DH-193	43.4833	126.318	Intrusive	granodiorite	168	4	342	6.96	24.4	0.616	49.1379	28.4125	Zhou et al., 2014, IGR
DH196	DH-194	43.4833	126.318	Intrusive	granodiorite	168	4	435	8.47	25.9	0.683	51.3577	27.2007	Zhou et al., 2014, IGR
DH196	DH-195	43.4833	126.318	Intrusive	granodiorite	168	4	474	8.22	28.2	0.689	57.6642	29.3583	Zhou et al., 2014, IGR
CLN	CL1-4	47.3862	128.69	Intrusive	Biotite monzogranite	178	1	432	9.14	34.46	0.79	47.2648	31.2888	Yang et al., 2012, Acta Petro. Sinica (CN)
CLN	CL1-4-1	47.3862	128.69	Intrusive	Biotite monzogranite	178	1	516	9.6	40.45	0.9	53.75	32.2386	Yang et al., 2012, Acta Petro. Sinica (CN)
CLN	CLN	47.3862	128.69	Intrusive	Biotite monzogranite	178	1	483	9.42	35.09	0.82	51.2739	30.6952	Yang et al., 2012, Acta Petro. Sinica (CN)
12GW001	12GW001	45.0944	131.274	Intrusive	syenogranite	213	2	115	47.4	38.2	5.74	2.42616	4.77367	Yang et al., 2015, Lithos
13GW012	13GW012	45.0128	131.107	Intrusive	syenogranite	210	2	65	37.1	30.2	4.25	1.75202	5.09705	Yang et al., 2015, Lithos
13GW012	13GW013	45.0128	131.107	Intrusive	syenogranite	210	2	60.6	34	23.5	3.74	1.78235	4.5071	Yang et al., 2015, Lithos
13GW012	13GW014	45.0128	131.107	Intrusive	syenogranite	210	2	51.5	37.7	29.3	3.69	1.36605	5.69563	Yang et al., 2015, Lithos
12GW016	13GW028	45.1264	131.537	Intrusive	syenogranite	209	2	224	24.7	20.2	2.67	9.06883	5.42676	Yang et al., 2015, Lithos
12GW016	13GW029	45.1264	131.537	Intrusive	syenogranite	209	2	257	30.7	20	3.44	8.37134	4.17035	Yang et al., 2015, Lithos
12GW016	13GW030	45.1264	131.537	Intrusive	syenogranite	209	2	241	24.2	19.5	2.84	9.95868	4.92512	Yang et al., 2015, Lithos
12GW016	13GW031	45.1264	131.537	Intrusive	syenogranite	209	2	286	16.3	18.7	1.77	17.546	7.57825	Yang et al., 2015, Lithos
13GW018	13GW015	45.0825	131.529	Intrusive	diorite (MME)	211	2	335	24.3	25.2	2.71	13.786	6.67009	Yang et al., 2015, Lithos
13GW018	13GW017	45.0825	131.529	Intrusive	diorite (MME)	211	2	321	19.1	22.6	2.25	16.8063	7.20488	Yang et al., 2015, Lithos
13GW018	13GW016	45.0825	131.529	Intrusive	diorite (MME)	211	2	336	48.9	18.8	5.74		2.34934	Yang et al., 2015, Lithos
13GW018	13GW018	45.0825	131.529	Intrusive	diorite (MME)	211	2	381	31.4	13.2	3.41	12.1338	2.77664	Yang et al., 2015, Lithos
13GW018	13GW025	45.0825	131.529	Intrusive	diorite (MME)	211	2	356	18	18.3	2.21		5.93963	Yang et al., 2015, Lithos
13GW018	13GW026	45.0825	131.529	Intrusive	diorite (MME)	211	2	335	16.5	13.9	1.97		5.06115	Yang et al., 2015, Lithos
13GW018	13GW027	45.0825	131.529	Intrusive	diorite (MME)	211	2	364	17.1	15	2.14		5.0278	Yang et al., 2015, Lithos
13GW010	13GW010	44.9934	131.243	Intrusive	diorite	204	2	367	37.9	23.1	3.98	9.68338	4.16322	Yang et al., 2015, Lithos
13GW010	13GW011	44.9934	131.243	Intrusive	diorite	204	2	356	35.8	24.2	3.88	9.94413	4.47388	Yang et al., 2015, Lithos
13GW010	13GW032	44.9934	131.243	Intrusive	diorite	204	2	576	14.6	5.83	1.34		3.12079	Yang et al., 2015, Lithos
13GW010	13GW033	44.9934	131.243	Intrusive	diorite	204	2	556	16	6.22	1.56		2.86	Yang et al., 2015, Lithos
13GW010	13GW034	44.9934	131.243	Intrusive	diorite	204	2	491	20.2	14.7	2.04		5.16878	Yang et al., 2015, Lithos
13GW010	13GW035	44.9934	131.243	Intrusive	diorite	204	2	447	17	14.4	1.66	26.2941	6.22236	Yang et al., 2015, Lithos
13GW010	13GW036	44.9934	131.243	Intrusive	diorite	204	2	544	29.4	19.6	3.16		4.44907	Yang et al., 2015, Lithos
11GW019	11GW018	45.4531	131.872	Intrusive	monzogranite	223	2	14	17	22.1	2.44	0.823529	6.49685	Yang et al., 2015, GR
11GW019	11GW019	45.4531	131.872	Intrusive	monzogranite	223	2	28	5	26.4	0.42	5.6	45.0874	Yang et al., 2015, GR
11GW019	11GW020	45.4531	131.872	Intrusive	monzogranite	223	2	31	12	15.8	1.77	2.58333	6.40301	Yang et al., 2015, GR
11GW019	11GW021	45.4531	131.872	Intrusive	monzogranite	223	2	35	15	10.8	2.31	2.33333	3.35361	Yang et al., 2015, GR
12GW041	11GW022	45.3225	131.972	Intrusive	granodiorite	257	3	748	5	16.9	0.39	149.6	31.083	Yang et al., 2015, GR
12GW041	11GW023	45.3225	131.972	Intrusive	granodiorite	257	3	779	4	22.1	0.37	194.75	42.8441	Yang et al., 2015, GR
12GW041	11GW024	45.3225	131.972	Intrusive	granodiorite	257	3	278	23	34	2.69	12.087	9.06624	Yang et al., 2015, GR
12GW041	11GW025	45.3225	131.972	Intrusive	granodiorite	257	3	271	12	18.3	1.67	22.5833	7.86023	Yang et al., 2015, GR
12GW049	11GW026	45.5711	132.405	Intrusive	syenogranite	218	2	58	19	20.7	2.38	3.05263	6.2387	Yang et al., 2015, GR
12GW049	11GW027	45.5711	132.405	Intrusive	syenogranite	218	2	143	26	22.4	3.47	5.5	4.63041	Yang et al., 2015, GR
12GW049	11GW028	45.5711	132.405	Intrusive	syenogranite	218	2	53	25	28.6	2.94	2.12	6.97781	Yang et al., 2015, GR
12GW022	12GW022	45.2277	131.575	Intrusive	granite	258	2	185	24	31.8	3.06	7.70833	7.45429	Yang et al., 2015, GR
12GW041	12GW041	45.3225	131.972	Intrusive	granodiorite	257	3	874	6	15.2	0.66	145.667	16.5196	Yang et al., 2015, GR
12GW047	12GW047	45.4765	132.194	Intrusive	granodiorite	262	3	884	12	28.2	1.2	73.6667	16.8565	Yang et al., 2015, GR
NE13-30	NE13-32	45.4786	132.203	Intrusive	granodiorite	249	2	810.9	9.1	20.9	0.61	89.1099	24.5763	Liu et al., 2017, Lithos
NE13-30	NE13-33	45.4786	132.203	Intrusive	granodiorite	249	2	766.9	6.9	17.7	0.8	111.145	15.8703	Liu et al., 2017, Lithos
NE13-30	NE13-34	45.4786	132.203	Intrusive	granodiorite	249	2	840.1	6.9	17.8	0.56	121.754	22.7999	Liu et al., 2017, Lithos
NE13-30	NE13-35	45.4786	132.203	Intrusive	granodiorite	249	2	742.9	9.8	26	0.85	75.8061	21.9409	Liu et al., 2017, Lithos
NE13-30	NE13-36	45.4786	132.203	Intrusive	granodiorite	249	2	836.2	9.6	21.7	0.72	87.1042	21.6186	Liu et al., 2017, Lithos
NE13-38	NE13-40	45.5092	132.041	Intrusive	syenogranite	209	3	66.7	15	13.2	2.34	4.44667	4.04631	Liu et al., 2017, Lithos
NE13-38	NE13-41	45.5092	132.041	Intrusive	syenogranite	209	3	63	13.9	15.9	1.66	4.53237	6.87052	Liu et al., 2017, Lithos
NE13-38	NE13-42	45.5092	132.041	Intrusive	syenogranite	209	3	52.7	16.2	14.5	2.12	3.25309	4.90606	Liu et al., 2017, Lithos
NE13-38	LJ-190	45.5092	132.041	Intrusive	syenogranite	209	3	67.57	15.45	16.8588	2.051	4.37346	5.89606	Liu et al., 2017, Lithos
NE13-38	LJ-191	45.5092	132.041	Intrusive	syenogranite	209	3	84.6	14.3	22.3128	1.831	5.91608	8.7411	Liu et al., 2017, Lithos
NE13-38	LJ-192	45.5092	132.041	Intrusive	syenogranite	209	3	74.6	16.12	22.8096	2.081	4.62779	7.86224	Liu et al., 2017, Lithos
NE13-38	LJ-193	45.5092	132.041	Intrusive	syenogranite	209	3	82.6	14.47	15.498	1.914	5.70836	5.8081	Liu et al., 2017, Lithos
NE13-38	LJ-194	45.5092	132.041	Intrusive	syenogranite	209	3	78.87	20.23	25.2828	2.822	3.89867	6.42641	Liu et al., 2017, Lithos
NE13-39	NE13-44	45.5092	132.041	Intrusive	syenogranite	199	3	54.4	15.7	17.7	2.06	3.46497	6.16321	Liu et al., 2017, Lithos
NE13-39	NE13-45	45.5092	132.041	Intrusive	syenogranite	199	3	58.4	16.5	19	1.83	3.53939	7.44737	Liu et al., 2017, Lithos
NE13-39	NE13-46	45.5092	132.041	Intrusive	syenogranite	199	3	58.7	16.5	16.8	2.12	3.55758	5.68426	Liu et al., 2017, Lithos
NE13-39	NE13-47	45.5092	132.041	Intrusive	syenogranite	199	3	88.7	17.6	16.8	2.26	5.03977	5.33214	Liu et al., 2017, Lithos
NE13-43	LJ-200	45.4903	132.104	Intrusive	syenogranite	208	2	42.91	15.69	13.0032	1.948	2.73486	4.78809	Liu et al., 2017, Lithos
NE13-43	LJ-201	45.4903	132.104	Intrusive	syenogranite	208	2	66.93	11.62	21.2976	1.829	5.7599	8.35252	Liu et al., 2017, Lithos
NE13-43	LJ-202	45.4903	132.104	Intrusive	syenogranite	208	2	69.18	15.93	14.094	2.159	4.34275	4.68255	Liu et al., 2017, Lithos
NE13-43	LJ-203	45.4903	132.104	Intrusive	syenogranite	208	2	103.9	20.26	24.4188	2.343	5.12833	7.47571	Liu et al., 2017, Lithos
NE13-43	LJ-204	45.4903	132.104	Intrusive	syenogranite	208	2	88.66	10.83	17.5392	1.651	8.18652	7.62015	Liu et al., 2017, Lithos
NE13-39	LJ-208	45.5092	132.041	Intrusive	syenogranite	199	3	127.6	7.794	5.00472	1.014	16.3716	3.54032	Liu et al., 2017, Lithos
NE13-39	LJ-209	45.5092	132.041	Intrusive	syenogranite	199	3	129.3	10.01	8.87652	1.253	12.9171	5.0815	Liu et al., 2017, Lithos
NE13-39	LJ-210	45.5092	132.041	Intrusive	syenogranite	199	3	126.3	10.05	17.3988	1.166	12.5672	10.7034	Liu et al., 2017, Lithos
NE13-39	LJ-211	45.5092	132.041	Intrusive	syenogranite	199	3	127.8	11.41	18.1764	1.215	11.2007	10.7308	Liu et al., 2017, Lithos
NE13-39	LJ-212	45.5092	132.041	Intrusive	syenogranite	199	3	78.5	7.864	6.78672	1.008	9.9822	4.82948	Liu et al., 2017, Lithos
JX1304	JX1302	44.9791	131.135	Intrusive	monzogranite	203	2	61.7	39.1	45.7	3.65	1.57801	8.98098	Jing et al., 2015, Earth Science (Journal of CUG)(CN)
JX1304	JX1304	44.9791	131.135	Intrusive	monzogranite	203	2	194.5	27.2	26.2	2.73	7.15074	6.88397	Jing et al., 2015, Earth Science (Journal of CUG)(CN)
JX1304	JX1305	44.9791	131.135	Intrusive	monzogranite	203	2	107.5	32.7	49	3.09	3.28746	11.3747	Jing et al., 2015, Earth Science (Journal of CUG)(CN)
1328x	JX1306	45.0651	131.244	Intrusive	monzogranite	204	2	66.4	34.4	32.4	3.32	1.93023	7.00015	Jing et al., 2015, Earth Science (Journal of CUG)(CN)
1328x	1328x	45.0651	131.244	Intrusive	monzogranite	204	2	31.7	49.6	34.5	4.84	0.639113	5.11298	Jing et al., 2015, Earth Science (Journal of CUG)(CN)
JX1304	1303x	44.9791	131.135	Intrusive	monzogranite	203	2	182	34.3	28.9	3.25	5.30612	6.37845	Jing et al., 2015, Earth Science (Journal of CUG)(CN)
Qingshan	Qingshan	45.4811	130.574	Intrusive	granodiorite	270	4	622	24.73	36.31	1.49	25.1516	17.48	Wu et al., 2001, Acta Petrologica Sinica (CN)
10_000	10_000	49.1667	131.934	Intrusive	Quartz	203.5	3.5			20.88	1.78	#DIV/0!	8.41417	Guryanov et al., 2020, RJPG
FAP-N1	FAP-N1-Q1	44.393	127.296	Intrusive	monzogranite	173	1	484.3	7.876	25.79	0.6658	61.4906	27.7849	Zhang et al., 2021, Acta Geologica Sinica (CN)
FAP-N1	FAP-N1-Q2	44.393	127.296	Intrusive	monzogranite	173	1	448.9	7.189	26.99	0.6637	62.4426	29.1697	Zhang et al., 2021, Acta Geologica Sinica (CN)
FAP-N1	FAP-N1-Q3	44.393	127.296	Intrusive	monzogranite	173	1	460.8	6.79	30.76	0.6481	67.8645	34.0443	Zhang et al., 2021, Acta Geologica Sinica (CN)
FAP-N1	FAP-N1-Q4	44.393	127.296	Intrusive	monzogranite	173	1	455.3	7.269	24.58	0.6579	62.6359	26.7992	Zhang et al., 2021, Acta Geologica Sinica (CN)
FAP-N1	FAP-N1-Q5	44.393	127.296	Intrusive	monzogranite	173	1	382.9	6.841	21.02	0.6476	55.9713	23.2823	Zhang et al., 2021, Acta Geologica Sinica (CN)
FAP-N2	FAP-N2-Q1	44.3992	127.298	Intrusive	Granodiorite	173	1	606	10.03	18.94	1.007	60.4187	13.4912	Zhang et al., 2021, Acta Geologica Sinica (CN)
FAP-N2	FAP-N2-Q2	44.3992	127.298	Intrusive	Granodiorite	173	1	497.7	8.127	15.94	0.8391	61.2403	13.6262	Zhang et al., 2021, Acta Geologica Sinica (CN)
FAP-N2	FAP-N2-Q3	44.3992	127.298	Intrusive	Granodiorite	173	1	437.8	7.646	12.27	0.7662	57.2587	11.4869	Zhang et al., 2021, Acta Geologica Sinica (CN)
FAP-N2	FAP-N2-Q4	44.3992	127.298	Intrusive	Granodiorite	173	1	531.7	8.428	12.93	0.8665	63.0873	10.7036	Zhang et al., 2021, Acta Geologica Sinica (CN)
FAP-N2	FAP-N2-Q5	44.3992	127.298	Intrusive	Granodiorite	173	1	533.1	9.815	17.12	0.9452	54.3148	12.9921	Zhang et al., 2021, Acta Geologica Sinica (CN)
FAP-N2	FAP-N2-Q6	44.3992	127.298	Intrusive	Granodiorite	173	1	530.4	8.885	14.79	0.9443	59.6961	11.2346	Zhang et al., 2021, Acta Geologica Sinica (CN)
H15-61	H15-61-2	45.3839	127.218	Intrusive	monzodiorite	179	3	1021.81	23.407	33.2316	2.03626		11.7063	Ge et al., 2017, Tecphy
H15-61	H15-61-3	45.3839	127.218	Intrusive	monzodiorite	179	3	960.089	22.4254	30.315	1.96153		11.0857	Ge et al., 2017, Tecphy
H15-61	H15-61-4	45.3839	127.218	Intrusive	monzodiorite	179	3	970.096	23.3902	33.1516	2.04019		11.6556	Ge et al., 2017, Tecphy
H15-63	H15-63-2	45.2833	127.485	Intrusive	Monzogranite	181	1	101.827	21.9065	37.0072	2.58867	4.64825	10.2544	Ge et al., 2017, Tecphy
H15-63	H15-63-3	45.2833	127.485	Intrusive	Monzogranite	181	1	94.362	23.7832	33.2886	2.71757	3.9676	8.78648	Ge et al., 2017, Tecphy
H15-63	H15-63-4	45.2833	127.485	Intrusive	Monzogranite	181	1	93.4735	20.5323	26.038	2.33737	4.55251	7.99064	Ge et al., 2017, Tecphy
H15-66	H15-66-2	45.3836	127.684	Intrusive	Monzogranite	180	1	70.084	17.679	12.0839	2.1953	3.96425	3.94833	Ge et al., 2017, Tecphy
H15-66	H15-66-3	45.3836	127.684	Intrusive	Monzogranite	180	1	84.2948	24.5206	17.5897	2.77362	3.43771	4.54896	Ge et al., 2017, Tecphy
H15-66	H15-66-4	45.3836	127.684	Intrusive	Monzogranite	180	1	91.7225	16.3948	12.2672	1.90317	5.59463	4.62348	Ge et al., 2017, Tecphy
H15-68	H15-68-2	45.3172	127.834	Intrusive	Granodiorite	174	1	350.376	8.54264	28.3513	1.02211	41.015	19.8965	Ge et al., 2017, Tecphy
H15-68	H15-68-3	45.3172	127.834	Intrusive	Granodiorite	174	1	322.551	6.59312	33.6361	0.869273	48.9223	27.7555	Ge et al., 2017, Tecphy
H15-68	H15-68-4	45.3172	127.834	Intrusive	Granodiorite	174	1	343.001	10.4903	21.7116	1.30853	32.6971	11.9017	Ge et al., 2017, Tecphy
RT-09	X01	44.2725	127.388	Intrusive	monzogranite	176	1	25.75	26.1	5.91	3.68	0.98659	1.15197	Zhao et al., 2021, Journal of Jilin Uni. (CN)
RT-09	X02	44.2725	127.388	Intrusive	monzogranite	176	1	23.56	27.9	6.07	4.27	0.844444	1.01967	Zhao et al., 2021, Journal of Jilin Uni. (CN)
RT-09	X03	44.2725	127.388	Intrusive	monzogranite	176	1	28.43	22.6	7.11	3.1	1.25796	1.64516	Zhao et al., 2021, Journal of Jilin Uni. (CN)
RT-09	X04	44.2725	127.388	Intrusive	monzogranite	176	1	27.39	30.8	9.4	4.31	0.889286	1.56441	Zhao et al., 2021, Journal of Jilin Uni. (CN)
RT-09	X05	44.2725	127.388	Intrusive	monzogranite	176	1	31.5	27.8	14	3.9	1.13309	2.57492	Zhao et al., 2021, Journal of Jilin Uni. (CN)
RT-09	X06	44.2725	127.388	Intrusive	monzogranite	176	1	26.18	28	7.68	3.86	0.935	1.42717	Zhao et al., 2021, Journal of Jilin Uni. (CN)
RT-09	X07	44.2725	127.388	Intrusive	monzogranite	176	1	60.05	26.7	14	3.41	2.24906	2.94492	Zhao et al., 2021, Journal of Jilin Uni. (CN)
RT-09	X08	44.2725	127.388	Intrusive	monzogranite	176	1	24.96	17.2	5.76	2.61	1.45116	1.58301	Zhao et al., 2021, Journal of Jilin Uni. (CN)
RT-09	X09	44.2725	127.388	Intrusive	monzogranite	176	1	24.55	18.2	5.76	2.42	1.3489	1.70729	Zhao et al., 2021, Journal of Jilin Uni. (CN)
RT-09	X10	44.2725	127.388	Intrusive	monzogranite	176	1	23.3	25.1	9.29	3.75	0.928287	1.77699	Zhao et al., 2021, Journal of Jilin Uni. (CN)
RT-09	X11	44.2725	127.388	Intrusive	monzogranite	176	1	30.32	29.6	16	3.92	1.02432	2.92775	Zhao et al., 2021, Journal of Jilin Uni. (CN)
RT-09	X12	44.2725	127.388	Intrusive	monzogranite	176	1	79.13	29.2	30.9	3.31	2.70993	6.69624	Zhao et al., 2021, Journal of Jilin Uni. (CN)
RT-09	X13	44.2725	127.388	Intrusive	monzogranite	176	1	30.82	25.6	23.3	3.56	1.20391	4.69469	Zhao et al., 2021, Journal of Jilin Uni. (CN)
RT-09	X14	44.2725	127.388	Intrusive	monzogranite	176	1	36.82	22.1	23.9	2.7	1.66606	6.34943	Zhao et al., 2021, Journal of Jilin Uni. (CN)
RT-09	X15	44.2725	127.388	Intrusive	monzogranite	176	1	18.07	39.7	19.5	4.57	0.455164	3.06069	Zhao et al., 2021, Journal of Jilin Uni. (CN)
RT-09	X16	44.2725	127.388	Intrusive	monzogranite	176	1	36.81	24.4	17	3.82	1.50861	3.19217	Zhao et al., 2021, Journal of Jilin Uni. (CN)
RT-09	X17	44.2725	127.388	Intrusive	monzogranite	176	1	15.08	42	23.2	5.35	0.359048	3.11053	Zhao et al., 2021, Journal of Jilin Uni. (CN)
RT-14	Z09	44.2793	127.414	Intrusive	monzogranite	178	1	58.49	21.1	22.5	2.42	2.77204	6.66911	Zhao et al., 2021, Journal of Jilin Uni. (CN)
RT-14	Z10	44.2793	127.414	Intrusive	monzogranite	178	1	42.75	25.3	32.9	3.07	1.68972	7.68702	Zhao et al., 2021, Journal of Jilin Uni. (CN)
RT-14	Z11	44.2793	127.414	Intrusive	monzogranite	178	1	36.68	33.8	30.1	3.87	1.08521	5.579	Zhao et al., 2021, Journal of Jilin Uni. (CN)
RT-14	Z12	44.2793	127.414	Intrusive	monzogranite	178	1	128.5	80.1	33.4	9.27	1.60424	2.58445	Zhao et al., 2021, Journal of Jilin Uni. (CN)
RT-14	Z13	44.2793	127.414	Intrusive	monzogranite	178	1	29	34.8	31.2	3.87	0.833333	5.78288	Zhao et al., 2021, Journal of Jilin Uni. (CN)
RT-04	C01	44.1899	127.308	Intrusive	monzogranite	180	2	9.7	19.1	17.8	2.66	0.507853	4.79997	Zhao et al., 2021, Journal of Jilin Uni. (CN)
RT-04	C02	44.1899	127.308	Intrusive	monzogranite	180	2	113.7	23	30.2	3.09	4.94348	7.0105	Zhao et al., 2021, Journal of Jilin Uni. (CN)
RT-04	C03	44.1899	127.308	Intrusive	monzogranite	180	2	6.8	6.71	26.5	1.06	1.01341	17.9325	Zhao et al., 2021, Journal of Jilin Uni. (CN)
RT-13	C04	44.2973	127.301	Intrusive	monzogranite	180	1	81.74	20.9	22.6	2.67	3.911	6.07152	Zhao et al., 2021, Journal of Jilin Uni. (CN)
RT-13	C05	44.2973	127.301	Intrusive	monzogranite	180	1	35	14.6	24.5	1.85	2.39726	9.49937	Zhao et al., 2021, Journal of Jilin Uni. (CN)
RT-13	C06	44.2973	127.301	Intrusive	monzogranite	180	1	122	26	17.1	4.22	4.69231	2.90659	Zhao et al., 2021, Journal of Jilin Uni. (CN)
RT-13	C07	44.2973	127.301	Intrusive	monzogranite	180	1	86.38	20.9	13.3	2.36	4.13301	4.04241	Zhao et al., 2021, Journal of Jilin Uni. (CN)
RT-13	C08	44.2973	127.301	Intrusive	monzogranite	180	1	161	15.3	22.3	1.91	10.5229	8.37475	Zhao et al., 2021, Journal of Jilin Uni. (CN)
RT-13	C09	44.2973	127.301	Intrusive	monzogranite	180	1	63.04	18.3	9.29	2.63	3.44481	2.53373	Zhao et al., 2021, Journal of Jilin Uni. (CN)
RT-13	C10	44.2973	127.301	Intrusive	monzogranite	180	1	134.7	16.5	28	2.01	8.16364	9.99223	Zhao et al., 2021, Journal of Jilin Uni. (CN)
RT-13	C11	44.2973	127.301	Intrusive	monzogranite	180	1	124.5	18.8	11.3	2.3	6.62234	3.52412	Zhao et al., 2021, Journal of Jilin Uni. (CN)
RT-13	C12	44.2973	127.301	Intrusive	monzogranite	180	1	175	16.1	24	1.78	10.8696	9.67145	Zhao et al., 2021, Journal of Jilin Uni. (CN)
RT-13	C13	44.2973	127.301	Intrusive	monzogranite	180	1	102.4	19.8	8.65	2.79	5.17172	2.22389	Zhao et al., 2021, Journal of Jilin Uni. (CN)
RT-13	C14	44.2973	127.301	Intrusive	monzogranite	180	1	101	21.82	15.69	2.97	4.62878	3.78937	Zhao et al., 2021, Journal of Jilin Uni. (CN)
RT-13	C15	44.2973	127.301	Intrusive	monzogranite	180	1	191	21.8	20.3	2.94	8.76147	4.95278	Zhao et al., 2021, Journal of Jilin Uni. (CN)
RT-13	C16	44.2973	127.301	Intrusive	monzogranite	180	1	67.86	17.7	18.6	2.29	3.8339	5.8261	Zhao et al., 2021, Journal of Jilin Uni. (CN)
RT-13	C17	44.2973	127.301	Intrusive	monzogranite	180	1	175.9	14.2	16.4	1.82	12.3873	6.46358	Zhao et al., 2021, Journal of Jilin Uni. (CN)
H15-09	H15-09-2	46.9167	128.183	Intrusive	monzogranite	188	1	32	39.6	36.1	3.72	0.808081	6.96089	Ge e tal., 2020, Acta Petrologica et Mineralogica (CN)
H15-09	H15-09-3	46.9167	128.183	Intrusive	monzogranite	188	1	329	9.56	25.5	1.18	34.4142	15.501	Ge e tal., 2020, Acta Petrologica et Mineralogica (CN)
H15-12	H15-12-4	46.9386	128.451	Intrusive	dolerite	187	2	538	20.9	13.2	2.05		4.61871	Ge e tal., 2020, Acta Petrologica Sinica (CN)
H15-12	H15-12-5	46.9386	128.451	Intrusive	dolerite	187	2	364	20.7	11	2.11		3.73948	Ge e tal., 2020, Acta Petrologica Sinica (CN)
H15-12	H15-12-6	46.9386	128.451	Intrusive	dolerite	187	2	492	19.3	13.6	1.99		4.90215	Ge e tal., 2020, Acta Petrologica Sinica (CN)
H15-12	H15-12-9	46.9386	128.451	Intrusive	dolerite	187	2	572	31.7	23.2	2.97		5.60315	Ge e tal., 2020, Acta Petrologica Sinica (CN)
1074TW	PM004-YH5	44.5048	127.598	Intrusive	Granodiorite	176	2	539	11.9	35.9	1.17	45.2941	22.0094	Ren, 2019, Acta Geologica Sinica (CN)
1074TW	PM004-YH6	44.5048	127.598	Intrusive	Granodiorite	176	2	584	18.5	31.2	1.92	31.5676	11.6561	Ren, 2019, Acta Geologica Sinica (CN)
1074TW	PM004-YH7	44.5048	127.598	Intrusive	Granodiorite	176	2	543	17.1	29	1.76	31.7544	11.8191	Ren, 2019, Acta Geologica Sinica (CN)
1074TW	PM006-YH9	44.5048	127.598	Intrusive	Granodiorite	176	2	591	11.9	30.1	1.31	49.6639	16.4815	Ren, 2019, Acta Geologica Sinica (CN)
BCG-01	BCG-1	43.0045	126.204	Intrusive	Granodiorite	173	2	345	15.6	27.5	1.69	22.1154	11.672	Feng et al., 2019, Acta Geologica Sinica (CN)
BCG-01	BCG-2	43.0045	126.204	Intrusive	Granodiorite	173	2	347	15.5	31.1	1.57	22.3871	14.2089	Feng et al., 2019, Acta Geologica Sinica (CN)
BCG-01	BCG-3	43.0045	126.204	Intrusive	Granodiorite	173	2	346	14.7	29.5	1.55	23.5374	13.6518	Feng et al., 2019, Acta Geologica Sinica (CN)
BCG-01	BCG-4	43.0045	126.204	Intrusive	Granodiorite	173	2	326	16.3	29.3	1.73	20	12.1485	Feng et al., 2019, Acta Geologica Sinica (CN)
BCG-01	BCG-5	43.0045	126.204	Intrusive	Granodiorite	173	2	324	16.1	32.1	1.75	20.1242	13.1573	Feng et al., 2019, Acta Geologica Sinica (CN)
BCG-01	BCG-6	43.0045	126.204	Intrusive	Granodiorite	173	2	358	14.2	27.6	1.52	25.2113	13.0247	Feng et al., 2019, Acta Geologica Sinica (CN)
BCGE-01	BCGE-10	43.0045	126.204	Intrusive	diorite (MME)	173	2	313	18.9	27.9	1.9		10.533	Feng et al., 2019, Acta Geologica Sinica (CN)
BCGE-01	BCGE-11	43.0045	126.204	Intrusive	diorite (MME)	173	2	341	18.5	33.1	2.03	18.4324	11.6959	Feng et al., 2019, Acta Geologica Sinica (CN)
BCGE-01	BCGE-12	43.0045	126.204	Intrusive	diorite (MME)	173	2	330	19.6	31.1	1.93	16.8367	11.5586	Feng et al., 2019, Acta Geologica Sinica (CN)
BCGE-01	BCGE-13	43.0045	126.204	Intrusive	diorite (MME)	173	2	298	13.2	27.3	1.36		14.3987	Feng et al., 2019, Acta Geologica Sinica (CN)
SFS	SFS-1	42.7938	125.907	Intrusive	Olivine gabbro	279	4	669	2.54	1.04	0.24		3.1083	Feng et al., 2018, Earth Science (CN)
SFS	SFS-2	42.7938	125.907	Intrusive	Olivine gabbro	279	4	729	2.94	1.26	0.26		3.47614	Feng et al., 2018, Earth Science (CN)
SFS	SFS-3	42.7938	125.907	Intrusive	Olivine gabbro	279	4	779	2.87	1.11	0.25		3.18481	Feng et al., 2018, Earth Science (CN)
SFS	SFS-4	42.7938	125.907	Intrusive	Olivine gabbro	279	4	711	2.94	1.04	0.25		2.98397	Feng et al., 2018, Earth Science (CN)
SFS	SFS-5	42.7938	125.907	Intrusive	Olivine gabbro	279	4	672	2.69	1.03	0.23		3.21225	Feng et al., 2018, Earth Science (CN)
SFS	SFS-6	42.7938	125.907	Intrusive	Olivine gabbro	279	4	657	2.64	0.94	0.24		2.80942	Feng et al., 2018, Earth Science (CN)
SFS	SFS-8	42.7938	125.907	Intrusive	Olivine gabbro	279	4	678	2.92	0.9	0.25		2.58228	Feng et al., 2018, Earth Science (CN)
SFS	SFS-9	42.7938	125.907	Intrusive	Olivine gabbro	279	4	695	3.13	1.06	0.26		2.92438	Feng et al., 2018, Earth Science (CN)
SFS	SFS-10	42.7938	125.907	Intrusive	Olivine gabbro	279	4	688	2.99	1.16	0.26		3.20026	Feng et al., 2018, Earth Science (CN)
SFS	SFS-11	42.7938	125.907	Intrusive	Olivine gabbro	279	4	711	2.95	1	0.25		2.8692	Feng et al., 2018, Earth Science (CN)
SFS	SFS-12	42.7938	125.907	Intrusive	Olivine gabbro	279	4	707	2.98	1.08	0.26		2.97955	Feng et al., 2018, Earth Science (CN)
SFS	SFS-13	42.7938	125.907	Intrusive	Olivine gabbro	279	4	682	3.11	1.12	0.27		2.97546	Feng et al., 2018, Earth Science (CN)
13HYL9		46.9259	129.599	Intrusive	Syenogranite	204	2	36.7	41.5	32.7	4.46	0.884337	5.25912	Guo et al., 2016, IGR
13HYL9		46.9259	129.599	Intrusive	Syenogranite	204	2	31.6	38.4	29	3.78	0.822917	5.50309	Guo et al., 2016, IGR
13HYL9		46.9259	129.599	Intrusive	Syenogranite	204	2	39.1	29.1	41.2	2.95	1.34364	10.0179	Guo et al., 2016, IGR
13HYL9		46.9259	129.599	Intrusive	Syenogranite	204	2	39.4	36.6	46.9	3.44	1.0765	9.77946	Guo et al., 2016, IGR
HYL2	HYL2-1	46.1986	127.658	Eruptive	trachyte	179	2	429	32.9	30.1	2.84	13.0395	7.60237	Tang et al., 2011, Global Geology (CN)
HYL2	HYL2-2	46.1986	127.658	Eruptive	trachyte	179	2	384	26.7	24.9	2.2	14.382	8.11853	Tang et al., 2011, Global Geology (CN)
HYL2	HYL2-6	46.1986	127.658	Eruptive	trachyte	179	2	458	29.5	27.9	2.6	15.5254	7.69718	Tang et al., 2011, Global Geology (CN)
HYL3	HYL3-1	46.1151	127.615	Eruptive	rhyolite	184	2	129	25.6	35.6	2.46	5.03906	10.3804	Tang et al., 2011, Global Geology (CN)
HYL3	HYL3-2	46.1151	127.615	Eruptive	rhyolite	184	2	133	25.5	37.3	2.39	5.21569	11.1947	Tang et al., 2011, Global Geology (CN)
7	007-Q-1	44.2097	127.362	Intrusive	granite	179	3	144	13.4	4.63	2.32	10.7463	1.43151	Sun, 2016, Master thesis of JLU(CN)
7	007-Q-2	44.2097	127.362	Intrusive	granite	179	3	135	12.8	7.48	2.05	10.5469	2.61727	Sun, 2016, Master thesis of JLU(CN)
7	007-Q-3	44.2097	127.362	Intrusive	granite	179	3	136	16.2	5.22	2.88	8.39506	1.30011	Sun, 2016, Master thesis of JLU(CN)
7	007-Q-4	44.2097	127.362	Intrusive	granite	179	3	54.3	34.4	3.51	7.59	1.57849	0.331716	Sun, 2016, Master thesis of JLU(CN)
7	007-Q-5	44.2097	127.362	Intrusive	granite	179	3	24.6	27	4.84	5.02	0.911111	0.69158	Sun, 2016, Master thesis of JLU(CN)
13	011-Q-1	44.3204	127.379	Intrusive	granite	182	3	192	21.5	32.4	2.64	8.93023	8.80322	Sun, 2016, Master thesis of JLU(CN)
13	011-Q-4	44.3204	127.379	Intrusive	granite	182	3	169	16.2	30.4	1.9	10.4321	11.4768	Sun, 2016, Master thesis of JLU(CN)
13	011-Q-5	44.3204	127.379	Intrusive	granite	182	3	181	16.6	27.7	1.98	10.9036	10.0349	Sun, 2016, Master thesis of JLU(CN)
13	013-Q-4	44.3204	127.379	Intrusive	granite	182	3	347	22.6	38.2	2.68	15.354	10.2242	Sun, 2016, Master thesis of JLU(CN)
14	014-Q-2	44.3227	127.369	Intrusive	granite	184	2	41.5	18.9	17.6	2.7	2.19577	4.67573	Sun, 2016, Master thesis of JLU(CN)
14	014-Q-3	44.3227	127.369	Intrusive	granite	184	2	42.1	14.7	8.85	2.3	2.86395	2.76004	Sun, 2016, Master thesis of JLU(CN)
14	014-Q-4	44.3227	127.369	Intrusive	granite	184	2	46	11.7	8.8	1.66	3.93162	3.80255	Sun, 2016, Master thesis of JLU(CN)
15GW013	15GW013	48.3331	130.753	Intrusive	garnet amphibolite	273	3	575	33.4	21.4	2.7		5.68526	Yang et al., 2019, Lithos
15GW013	15GW014	48.3331	130.753	Intrusive	garnet amphibolite	273	3	632	16.6	19.8	2.29		6.20198	Yang et al., 2019, Lithos
15GW013	15GW015	48.3331	130.753	Intrusive	garnet amphibolite	273	3	598	33.3	25.6	3.21		5.72052	Yang et al., 2019, Lithos
15GW013	15GW016	48.3331	130.753	Intrusive	garnet amphibolite	273	3	329	28	16.8	3.17		3.80146	Yang et al., 2019, Lithos
15GW013	15GW017	48.3331	130.753	Intrusive	garnet amphibolite	273	3	487	11.4	15	1.27	42.7193	8.47204	Yang et al., 2019, Lithos
15GW013	15GW018	48.3331	130.753	Intrusive	garnet amphibolite	273	3	317	17.8	8.86	2.11		3.01198	Yang et al., 2019, Lithos
15GW013	15GW019	48.3331	130.753	Intrusive	garnet amphibolite	273	3	543	33.2	26.5	3.46		5.49377	Yang et al., 2019, Lithos
15GW013	15GW020	48.3331	130.753	Intrusive	garnet amphibolite	273	3	372	18.8	8.88	2.07		3.07711	Yang et al., 2019, Lithos
15GW013	15GW021	48.3331	130.753	Intrusive	garnet amphibolite	273	3	680	15.8	19.6	2.08		6.75917	Yang et al., 2019, Lithos
15GW013	15GW022	48.3331	130.753	Intrusive	garnet amphibolite	273	3	637	42.8	36.5	4.26		6.14588	Yang et al., 2019, Lithos
15GW013	15GW025	48.3331	130.753	Intrusive	garnet amphibolite	273	3	413	64.4	24.4	7.26		2.41076	Yang et al., 2019, Lithos
15GW026	15GW026	48.2922	130.74	Intrusive	diorite	260	2	641	63.9	49.5	6.65		5.3393	Yang et al., 2019, Lithos
15GW026	15GW027	48.2922	130.74	Intrusive	diorite	260	2	574	65.7	47.8	6.42		5.34064	Yang et al., 2019, Lithos
15GW026	15GW028	48.2922	130.74	Intrusive	diorite	260	2	642	43.2	40.6	4.75		6.13102	Yang et al., 2019, Lithos
15GW026	15GW029	48.2922	130.74	Intrusive	diorite	260	2	552	72	48.2	6.9		5.0107	Yang et al., 2019, Lithos
15GW026	15GW030	48.2922	130.74	Intrusive	diorite	260	2	529	65.2	47.3	7.08		4.79213	Yang et al., 2019, Lithos
15GW026	15GW031	48.2922	130.74	Intrusive	diorite	260	2	743	31.4	37.2	3.43		7.77946	Yang et al., 2019, Lithos
15GW026	15GW032	48.2922	130.74	Intrusive	diorite	260	2	605	62	45.4	5.99		5.43663	Yang et al., 2019, Lithos
15GW036	15GW033	48.2367	130.726	Intrusive	metagabbro	264	2	511	36.5	42.5	3.55		8.58739	Yang et al., 2019, Lithos
15GW036	15GW034	48.2367	130.726	Intrusive	metagabbro	264	2	498	44.6	48.7	4.46		7.8324	Yang et al., 2019, Lithos
15GW036	15GW035	48.2367	130.726	Intrusive	metagabbro	264	2	538	45.4	46.9	4.12		8.16538	Yang et al., 2019, Lithos
15GW036	15GW036	48.2367	130.726	Intrusive	metagabbro	264	2	472	42.8	45.2	4.34		7.47049	Yang et al., 2019, Lithos
14GW051	14GW049	46.6269	130.805	Intrusive	gabbro	259	3	515	12.6	8.98	1.5		4.29423	Dong et al., 2017, Tecphy
14GW051	14GW050	46.6269	130.805	Intrusive	gabbro	259	3	484	8.3	6.29	0.967		4.66579	Dong et al., 2017, Tecphy
14GW051	14GW051	46.6269	130.805	Intrusive	gabbro	259	3	475	9.4	6.66	1.11		4.3038	Dong et al., 2017, Tecphy
14GW051	14GW052	46.6269	130.805	Intrusive	gabbro	259	3	461	16.8	14.7	1.71		6.16626	Dong et al., 2017, Tecphy
14GW051	14GW053	46.6269	130.805	Intrusive	gabbro	259	3	659	8.35	7.18	0.947		5.43845	Dong et al., 2017, Tecphy
14GW051	14GW054	46.6269	130.805	Intrusive	gabbro	259	3	570	7.11	5.55	0.8		4.97627	Dong et al., 2017, Tecphy
14GW051	14GW055	46.6269	130.805	Intrusive	gabbro	259	3	407	10.5	7.83	1.37		4.0996	Dong et al., 2017, Tecphy
14GW051	14GW056	46.6269	130.805	Intrusive	gabbro	259	3	484	9.6	5.9	1.07		3.9552	Dong et al., 2017, Tecphy
11GW097	11GW097	46.2042	132.991	Intrusive	Hornblende gabbro	282	2	174	14.8	4.78	1.65		2.078	Bi et al., 2015, Lithos
11GW097	11GW098	46.2042	132.991	Intrusive	Hornblende gabbro	282	2	471	18.8	6.53	2.01		2.33033	Bi et al., 2015, Lithos
11GW097	11GW099	46.2042	132.991	Intrusive	Hornblende gabbro	282	2	266	19	6.45	2.1		2.20313	Bi et al., 2015, Lithos
11GW097	12GW053	46.2042	132.991	Intrusive	Hornblende gabbro	282	2	354	19.8	6.27	2.02		2.22647	Bi et al., 2015, Lithos
13HHL-3	13GW047	46.2093	133.145	Intrusive	Gabbro	274	2	547	17.3	5.73	1.89		2.17467	Bi et al., 2015, Lithos
13HHL-3	13HHL3-1	46.2093	133.145	Intrusive	Gabbro	274	2	566	11.5	4.47	1.39		2.30671	Bi et al., 2015, Lithos
13HHL-3	13HHL3-2	46.2093	133.145	Intrusive	Gabbro	274	2	491	6.96	4.21	0.94		3.21259	Bi et al., 2015, Lithos
13GW044	13GW048	46.2093	133.145	Intrusive	Plagiogranite	277	2	137	8.05	69.5	0.81	17.0186	61.5461	Bi et al., 2015, Lithos
13GW044	13GW044	46.2093	133.145	Intrusive	Plagiogranite	277	2	70.1	23.5	19.3	3.35	2.98298	4.1325	Bi et al., 2015, Lithos
13GW044	13GW045	46.2093	133.145	Intrusive	Plagiogranite	277	2	170	17.3	9.95	2.59	9.82659	2.75565	Bi et al., 2015, Lithos
13GW044	13GW046	46.2093	133.145	Intrusive	Plagiogranite	277	2	82.6	11.8	20.4	1.26	7	11.6134	Bi et al., 2015, Lithos
13GW124	13GW122	46.1064	131.845	Intrusive	Graphic granite	270	2	19	24.7	7.25	3.73	0.769231	1.39421	Bi et al., 2016, Lithos
13GW124	13GW123	46.1064	131.845	Intrusive	Graphic granite	270	2	23.1	23.9	10.9	3.51	0.966527	2.22751	Bi et al., 2016, Lithos
13GW124	13GW124	46.1064	131.845	Intrusive	Graphic granite	270	2	40.6	28.7	23.8	3.87	1.41463	4.4113	Bi et al., 2016, Lithos
13GW104	13GW104	46.0475	132.096	Intrusive	Alkali feldspar granite	272	3	9.18	87.8	113	9.25	0.104556	8.76269	Bi et al., 2016, Lithos
13GW104	13GW105	46.0475	132.096	Intrusive	Alkali feldspar granite	272	3	9.31	76.5	70.9	8.83	0.121699	5.75952	Bi et al., 2016, Lithos
13GW104	13GW106	46.0475	132.096	Intrusive	Alkali feldspar granite	272	3	7.53	55.6	74.5	6.93	0.135432	7.71123	Bi et al., 2016, Lithos
13GW104	13GW107	46.0475	132.096	Intrusive	Alkali feldspar granite	272	3	5.52	41.2	27.7	4.93	0.133981	4.03026	Bi et al., 2016, Lithos
13GW104	13GW108	46.0475	132.096	Intrusive	Alkali feldspar granite	272	3	6.96	38.6	30.4	4.44	0.180311	4.91124	Bi et al., 2016, Lithos
13GW564	13GW564	46.26	132.432	Intrusive	Monzogranite	267	2	85.3	31.8	20.8	4.06	2.68239	3.67484	Bi et al., 2016, Lithos
13GW564	13GW565	46.26	132.432	Intrusive	Monzogranite	267	2	97.1	33.8	29.6	4.06	2.87278	5.22957	Bi et al., 2016, Lithos
13GW096	13GW096	46.1133	132.559	Intrusive	Monzogranite	282	2	253	11.9	79.1	1.2	21.2605	47.282	Bi et al., 2016, Lithos
13GW096	13GW097	46.1133	132.559	Intrusive	Monzogranite	282	2	130	9.97	48	1.01	13.0391	34.0895	Bi et al., 2016, Lithos
13GW090	13GW089	46.0469	132.598	Intrusive	Monzogranite	281	2	70	19.8	29.9	2.89	3.53535	7.4212	Bi et al., 2016, Lithos
13GW090	13GW090	46.0469	132.598	Intrusive	Monzogranite	281	2	53	22.4	38.8	2.37	2.36607	11.7431	Bi et al., 2016, Lithos
13GW110	11GW030	46.1061	131.944	Intrusive	Gabbro-diorite	275	2	476	22.5	20.8	2.81		5.30955	Bi et al., 2016, Lithos
13GW110	13GW110	46.1061	131.944	Intrusive	Gabbro-diorite	275	2	512	25.8	22.8	2.83		5.77895	Bi et al., 2016, Lithos
13GW110	13GW111	46.1061	131.944	Intrusive	Gabbro-diorite	275	2	547	27.6	24.6	3.07		5.74774	Bi et al., 2016, Lithos
13GW110	13GW115	46.1061	131.944	Intrusive	Gabbro-diorite	275	2	493	32.2	28.2	3.73		5.42302	Bi et al., 2016, Lithos
13GW110	13GW116	46.1061	131.944	Intrusive	Gabbro-diorite	275	2	565	32.2	27.2	3.6		5.4196	Bi et al., 2016, Lithos
13GW110	13GW117	46.1061	131.944	Intrusive	Gabbro-diorite	275	2	458	32.9	31.3	3.78		5.93954	Bi et al., 2016, Lithos
14GW516	14GW515	47.9917	133.183	Eruptive	Meta-rhyolite	279	2	35.7	16.6	12.9	2.03	2.1506	4.55821	Bi et al., 2017, JAES
14GW516	14GW516	47.9917	133.183	Eruptive	Meta-rhyolite	279	2	81.3	15.9	18.4	2.02	5.11321	6.53382	Bi et al., 2017, JAES
14GW516	14GW518	47.9917	133.183	Eruptive	Meta-rhyolite	279	2	50	22.4	25.9	2.79	2.23214	6.6588	Bi et al., 2017, JAES
14GW516	14GW532	47.9917	133.183	Eruptive	Meta-rhyolite	279	2	55	17.4	21.4	2.5	3.16092	6.14008	Bi et al., 2017, JAES
13GW186	13GW186	47.8578	132.915	Eruptive	rhyolite	279	5	90.5	31.2	35.5	3.63	2.90064	7.01491	Bi et al., 2017, JAES
13GW186	14GW174	47.8578	132.915	Eruptive	rhyolite	279	5	154	34.3	37.8	4.08	4.4898	6.64557	Bi et al., 2017, JAES
13GW186	14GW175	47.8578	132.915	Eruptive	rhyolite	279	5	105	28.2	30.7	3.63	3.7234	6.06642	Bi et al., 2017, JAES
13GW186	14GW176	47.8578	132.915	Eruptive	rhyolite	279	5	105	37.5	38.1	4.57	2.8	5.98011	Bi et al., 2017, JAES
13GW186	14GW177	47.8578	132.915	Eruptive	rhyolite	279	5	137	41.7	47.2	4.71	3.28537	7.18823	Bi et al., 2017, JAES
13GW186	13GW189	47.8578	132.915	Eruptive	rhyolite	279	5	113	28.1	31.6	3.25	4.02135	6.97436	Bi et al., 2017, JAES
13GW118	13GW118	46.1053	131.908	Eruptive	rhyolite	267	5	135	31.6	30.1	3.13	4.27215	6.89799	Bi et al., 2017, JAES
14GW515-532	14GW524	47.9917	133.183	Eruptive	Meta-basalt	279		389	25.3	18.6	2.21		6.037	Bi et al., 2017, JAES
14GW515-532	14GW526	47.9917	133.183	Eruptive	Meta-basalt	279		694	24.9	17.6	2.03		6.21895	Bi et al., 2017, JAES
14GW515-532	14GW528	47.9917	133.183	Eruptive	Meta-basalt	279		853	31.8	38.7	2.74		10.1312	Bi et al., 2017, JAES
14GW515-532	14GW529	47.9917	133.183	Eruptive	Meta-basalt	279		390	29.7	27.2	2.86		6.82187	Bi et al., 2017, JAES
14GW515-532	14GW530	47.9917	133.183	Eruptive	Meta-basalt	279		356	44	39.6	4.3	8.09091	6.60583	Bi et al., 2017, JAES
14GW542-550	14GW542	47.9208	133.059	Eruptive	basalt-andesite	279		560	34	18.2	4.37		2.98738	Bi et al., 2017, JAES
14GW542-550	14GW544	47.9208	133.059	Eruptive	basalt-andesite	279		207	35.1	27.4	4.21		4.66841	Bi et al., 2017, JAES
14GW542-550	14GW550	47.9208	133.059	Eruptive	basalt-andesite	279		592	39.9	13	4.28		2.17871	Bi et al., 2017, JAES
13GW100-102	13GW100	46.1847	132.073	Eruptive	basalt-andesite	265		580	22.6	13.8	2.38		4.15913	Bi et al., 2017, JAES
13GW100-102	13GW101	46.1847	132.073	Eruptive	basalt-andesite	265		513	21.7	13.2	2.28		4.15279	Bi et al., 2017, JAES
13GW100-102	13GW102	46.1847	132.073	Eruptive	basalt-andesite	265		596	26.3	15.7	2.57		4.38195	Bi et al., 2017, JAES
13GW166	13GW166	46.3719	132.111	Eruptive	basatic andesite	275	3	656	21.7	26.3	2.32	30.2304	8.13146	Bi et al., 2017, JAES
13GW166	13GW167	46.3719	132.111	Eruptive	basatic andesite	275	3	753	23.2	25.8	2.32		7.97687	Bi et al., 2017, JAES
13GW166	13GW168	46.3719	132.111	Eruptive	basatic andesite	275	3	718	21.1	24.6	2.23		7.91281	Bi et al., 2017, JAES
13GW166	13GW169	46.3719	132.111	Eruptive	basatic andesite	275	3	771	21.2	24.8	2.18		8.16011	Bi et al., 2017, JAES
10GW251	10GW250	47.0839	131.72	Intrusive	biotite monzogranite	260	8	487	7.96	22.8	0.73	61.1809	22.4033	Bi et al., 2014, Journal of Earth Sciences and Env. (CN)
10GW251	10GW251	47.0839	131.72	Intrusive	biotite monzogranite	260	8	394	10.3	21.1	0.95	38.2524	15.9316	Bi et al., 2014, Journal of Earth Sciences and Env. (CN)
11GW041	11GW041	47.0833	131.709	Intrusive	amphibolite biotite monzogranite	261	3	300	29.1	26.8	3.13	10.3093	6.14173	Bi et al., 2014, Journal of Earth Sciences and Env. (CN)
11GW041	11GW042	47.0833	131.709	Intrusive	amphibolite biotite monzogranite	261	3	283	28.1	24	3.22	10.0712	5.34633	Bi et al., 2014, Journal of Earth Sciences and Env. (CN)
13GW197	13GW197	47.0839	131.708	Intrusive	amphibolite biotite monzogranite	278	3	261	28.5	24.5	3.23	9.15789	5.44082	Bi et al., 2014, Journal of Earth Sciences and Env. (CN)
13GW197	13GW198	47.0839	131.708	Intrusive	amphibolite biotite monzogranite	278	3	329	30.4	24.7	3.19	10.8224	5.55401	Bi et al., 2014, Journal of Earth Sciences and Env. (CN)
13GW197	13GW199	47.0839	131.708	Intrusive	amphibolite biotite monzogranite	278	3	227	29.8	24.3	3.19	7.61745	5.46407	Bi et al., 2014, Journal of Earth Sciences and Env. (CN)
10GW240	11GW064	47.9194	133.069	Intrusive	granodiorite	284	2	418	19.1	12.2	1.8	21.8848	4.8617	Yu et al., 2013, Acta Petro. Sinica (CN)
10GW240	11GW065	47.9194	133.069	Intrusive	granodiorite	284	2	325	13.8	42	1.24	23.5507	24.2956	Yu et al., 2013, Acta Petro. Sinica (CN)
10GW240	10GW240	47.9194	133.069	Intrusive	granodiorite	284	2	205	5.67	18.9	0.55	36.1552	24.649	Yu et al., 2013, Acta Petro. Sinica (CN)
10GW240	10GW244	47.9194	133.069	Intrusive	granodiorite	284	2	330	26.8	9.11	2.84	12.3134	2.30092	Yu et al., 2013, Acta Petro. Sinica (CN)
10GW240	12GW074	47.9194	133.069	Intrusive	granodiorite	284	2	373	11.5	9.74	1.22	32.4348	5.72664	Yu et al., 2013, Acta Petro. Sinica (CN)
11GW070	11GW066	47.92	133.069	Intrusive	Hornblende gabbro(MME）	278	2	437	40.1	23	4.55		3.62591	Yu et al., 2013, Acta Petro. Sinica (CN)
11GW070	11GW068	47.92	133.069	Intrusive	Hornblende gabbro(MME）	278	2	365	55.1	18.3	6.75	6.62432	1.94468	Yu et al., 2013, Acta Petro. Sinica (CN)
11GW070	11GW067	47.92	133.069	Intrusive	Hornblende gabbro(MME）	278	2	399	49.7	23.1	5.71		2.90186	Yu et al., 2013, Acta Petro. Sinica (CN)
11GW070	11GW070	47.92	133.069	Intrusive	Hornblende gabbro(MME）	278	2	448	50.8	22.1	5.41		2.93019	Yu et al., 2013, Acta Petro. Sinica (CN)
11GW070	11GW071	47.92	133.069	Intrusive	Hornblende gabbro(MME）	278	2	339	21.2	12.5	2.3		3.89837	Yu et al., 2013, Acta Petro. Sinica (CN)
11GW070	10GW242	47.92	133.069	Intrusive	Hornblende gabbro(MME）	278	2	156	58.9	14.3	7.15		1.4346	Yu et al., 2013, Acta Petro. Sinica (CN)
RH02-03	RH02-1	46.1853	133.019	Intrusive	gabbro	274	3	499	8.1	3.84	0.82		3.35906	Sun et al., 2015, Tecphy
RH02-03	RH02-2	46.1853	133.019	Intrusive	gabbro	274	3	483	6.7	3.77	0.72		3.75586	Sun et al., 2015, Tecphy
RH02-03	RH02-3	46.1853	133.019	Intrusive	gabbro	274	3	498	7.1	3.78	0.74		3.66404	Sun et al., 2015, Tecphy
RH02-03	RH02-4	46.1853	133.019	Intrusive	gabbro	274	3	491	7	3.36	0.76		3.17122	Sun et al., 2015, Tecphy
RH02-03	RH02-5	46.1853	133.019	Intrusive	gabbro	274	3	477	7.8	3.67	0.83		3.17167	Sun et al., 2015, Tecphy
RH02-03	RH02-8	46.1853	133.019	Intrusive	gabbro	274	3	502	7	3.91	0.69		4.0647	Sun et al., 2015, Tecphy
RH02-03	RH02-9	46.1853	133.019	Intrusive	gabbro	274	3	466	9	4.05	0.87		3.33915	Sun et al., 2015, Tecphy
RH02-10	RH02-10	46.1853	133.019	Intrusive	gabbro	276	3	479	6.5	3.55	0.68		3.74473	Sun et al., 2015, Tecphy
RH02-10	RH02-11	46.1853	133.019	Intrusive	gabbro	276	3	466	6.5	3.45	0.73		3.38998	Sun et al., 2015, Tecphy
RH02-10	RH02-12	46.1853	133.019	Intrusive	gabbro	276	3	475	6.2	3.58	0.71		3.61681	Sun et al., 2015, Tecphy
RH02-10	RH02-13	46.1853	133.019	Intrusive	gabbro	276	3	476	6.2	3.23	0.71		3.26321	Sun et al., 2015, Tecphy
D5343	P15LT2	46.5094	128.426	Intrusive	Alkali feldspar granite	189	3	19	40.7	11.8	6.45	0.46683	1.31227	Yin et al., 2021, Journal of JLU (CN)
D5343	P8TC42	46.5094	128.426	Intrusive	Alkali feldspar granite	189	3	30	15.11	19.9	0.79	1.98544	18.0687	Yin et al., 2021, Journal of JLU (CN)
D5343	P9TC8	46.5094	128.426	Intrusive	Alkali feldspar granite	189	3	66	13.38	12.5	0.46	4.93274	19.4918	Yin et al., 2021, Journal of JLU (CN)
D5343	P10TC2	46.5094	128.426	Intrusive	Alkali feldspar granite	189	3	55	30.9	26.9	3.19	1.77994	6.0487	Yin et al., 2021, Journal of JLU (CN)
D5343	D4657	46.5094	128.426	Intrusive	Alkali feldspar granite	189	3	96	15.8	30.7	2.24	6.07595	9.83085	Yin et al., 2021, Journal of JLU (CN)
D5343	D5343	46.5094	128.426	Intrusive	Alkali feldspar granite	189	3	342	66	52.2	8.83	5.18182	4.24043	Yin et al., 2021, Journal of JLU (CN)
D2713	P7TC6	46.5125	128.304	Intrusive	syenogranite	191	3	140	8.58	22.9	1.21	16.317	13.5753	Yin et al., 2021, Journal of JLU (CN)
D2713	P12TC32	46.5125	128.304	Intrusive	syenogranite	191	3	33	30.1	28.3	3.46	1.09635	5.86693	Yin et al., 2021, Journal of JLU (CN)
D2713	P8TC12	46.5125	128.304	Intrusive	syenogranite	191	3	10	23.7	19.1	2.92	0.421941	4.69193	Yin et al., 2021, Journal of JLU (CN)
D2713	D2713	46.5125	128.304	Intrusive	syenogranite	191	3	52	12.7	27.2	1.99	4.09449	9.8043	Yin et al., 2021, Journal of JLU (CN)
HLJ-04	HLJ-4	46.1421	132.073	Eruptive	Andesite	280	3	775	20.4	26.6	2.54		7.51188	Li et al., 2020, GJ
HLJ-05	HLJ-5	46.2034	132.052	Eruptive	Andesite	282	3	416	20.5	25.2	2.53		7.14464	Li et al., 2020, GJ
HLJ-04	HLJ-6	46.1421	132.073	Eruptive	Andesite	280	3	780	22.5	23.3	2.88		5.80315	Li et al., 2020, GJ
HLJ-04	HLJ-7	46.1421	132.073	Eruptive	Andesite	280	3	817	22.1	24.4	2.82		6.20642	Li et al., 2020, GJ
HLJ-05	HLJ-8	46.2034	132.052	Eruptive	Andesite	282	3	839	20.7	23.7	2.79		6.09319	Li et al., 2020, GJ
HLJ-05	HLJ-9	46.2034	132.052	Eruptive	Andesite	282	3	579	22.6	20.9	2.83		5.29737	Li et al., 2020, GJ
HLJ-05	HLJ-10	46.2034	132.052	Eruptive	Andesite	282	3	725	22.7	23.9	2.53		6.77607	Li et al., 2020, GJ
